# Supplementary material for: Genetic and Molecular Characterization of Submergence Response Identifies Subtol6 as a Major Submergence Tolerance Locus in Maize
Source: PLoS One. 2015 Mar 25;10(3):e0120385. doi: 10.1371/journal.pone.0120385 (PMC4373911; doi:10.1371/journal.pone.0120385)
Supplement: S1 File — (XLSX) [file pone.0120385.s018.xlsx]

## Sheet: 24h Sub vs Control
FC=sub/control; p< 0.001	B73	B97	Mo18W	M162W		Maize Annotation		TF Family		Arabidopsis Best Hit				Rice Best Hit
GRMZM2G178005	-3	-10.8	-4.43065			hypothetical protein LOC100277137				AT5G16250				LOC_Os04g41900.1
GRMZM2G022253	-3.1	-8.7	-3.88699			Transcribed locus
GRMZM2G406951	-5.7	-8.5	-7.83491	-6.7		triglyceride lipase activity				AT1G05800	DGL	alpha/beta-Hydrolases superfamily protein		LOC_Os01g67430.1
GRMZM2G464011	-2.4	-8.5	-7.28643			hypothetical protein LOC100381321
GRMZM2G000825		-8.5				hypothetical protein LOC100273725				AT3G51280		Tetratricopeptide repeat (TPR)-like superfamily protein		LOC_Os09g36740.1
GRMZM2G012970	-3.4	-8.4				LOC100277584				AT2G38370		Plant protein of unknown function (DUF827)		LOC_Os03g22040.1
GRMZM2G107686		-8.4				serine-type endopeptidase activity				AT1G04110	SDD1	Subtilase family protein		LOC_Os03g04950.1
GRMZM2G050268	-3.8	-8.2				hypothetical protein LOC100384832				AT3G51280		Tetratricopeptide repeat (TPR)-like superfamily protein		LOC_Os09g36740.1
GRMZM2G030284		-8.1	-6.19741			LOC100191450				AT5G51600	ATMAP65-3,MAP65-3,PLE	Microtubule associated protein (MAP65/ASE1) family protein		LOC_Os01g49200.1
GRMZM2G042364		-7.9				membrane				AT5G07050		nodulin MtN21 /EamA-like transporter family protein		LOC_Os01g58910.1
GRMZM2G434098		-7.9				plant-specific domain TIGR01568 family protein				AT2G36026		Ovate family protein		LOC_Os01g64430.1
GRMZM2G132077	-4.2	-7.8	-6.07058			LOC100276911								LOC_Os12g38140.1
GRMZM5G812425		-7.7	-3.80687	-3		triglyceride lipase activity				AT1G05800	DGL	alpha/beta-Hydrolases superfamily protein		LOC_Os01g67430.1
GRMZM2G085661	-6.7	-7.7	-5.23384	-2.8		benzoxazinone synthesis2				AT3G26330	CYP71B37	cytochrome P450, family 71, subfamily B, polypeptide 37		LOC_Os08g01510.1
GRMZM2G333095	2.1	-7.4								AT2G40475				LOC_Os01g07240.1
GRMZM2G034647		-7.3				cyclin1				AT5G06150	CYC1BAT,CYCB1;2	Cyclin family protein		LOC_Os05g41390.1
GRMZM2G003368		-7.3				fatty acid metabolic process				AT3G02610		Plant stearoyl-acyl-carrier-protein desaturase family protein		LOC_Os08g09950.1
GRMZM2G034471	-7.8	-7.2	-5.70906	-3.6		monooxygenase activity				AT2G46660	CYP78A6	cytochrome P450, family 78, subfamily A, polypeptide 6		LOC_Os09g35940.1
GRMZM2G496319	-5.2	-7.2	-6.84232			Hypothetical protein LOC100278850
GRMZM2G100478		-7.2	-7.23783			SNAP receptor activity				AT1G08560	ATSYP111,KN,SYP111	syntaxin of plants 111		LOC_Os03g52650.1
GRMZM2G070115		-7.2								AT1G20930	CDKB2;2	cyclin-dependent kinase B2;2		LOC_Os08g40170.1
GRMZM2G089819	-4	-7.1	-3.90247			brassinosteroid LRR receptor kinase				AT3G56100	IMK3,MRLK	meristematic receptor-like kinase		LOC_Os11g01620.1
AC185478.4_FG005	-6.9	-7.1												LOC_Os02g51510.1
GRMZM2G113196		-7.1				LOC100277912				AT5G56120				LOC_Os08g38790.1
AC233916.1_FG002		-7.1								AT1G05800.1	DGL	alpha/beta-Hydrolases superfamily protein		LOC_Os01g67430.1
GRMZM2G047572		-7				hypothetical protein LOC100275865				AT2G24070		Family of unknown function (DUF566)		LOC_Os09g11440.2
GRMZM5G819523		-7				hypothetical protein LOC100216614				AT5G03870		Glutaredoxin family protein		LOC_Os04g33680.1
GRMZM2G159393	-4.4	-6.9				disulfide oxidoreductase/ monooxygenase/ oxidoreductase				AT4G28720	YUC8	Flavin-binding monooxygenase family protein		LOC_Os04g03980.1
GRMZM2G013688		-6.7				DNA binding		bHLH		AT1G32640	ATMYC2,JAI1,JIN1,MYC2,RD22BP1,ZBF1	Basic helix-loop-helix (bHLH) DNA-binding family protein		LOC_Os09g34330.1
GRMZM2G001508	-4.7	-6.6	-5.15454	-5.2		stem 28 kDa glycoprotein				AT4G29260		HAD superfamily, subfamily IIIB acid phosphatase		LOC_Os05g09740.1
GRMZM2G149624	-1.1	-6.6	-7.78724			proline-rich protein				AT2G21140	ATPRP2,PRP2	proline-rich protein 2		LOC_Os03g14130.1
GRMZM2G177110	-5	-6.6				seed specific protein Bn15D17A		LOB		AT3G49940	LBD38	LOB domain-containing protein 38		LOC_Os07g40000.1
GRMZM2G026664		-6.6				protein binding				AT2G39760	ATBPM3,BPM3	BTB/POZ/MATH-domains containing protein		LOC_Os08g41180.1
GRMZM2G103672		-6.6				beta-expansin 4				AT2G45110	ATEXPB4,ATHEXP BETA 1.1,EXPB4	expansin B4		LOC_Os03g44290.1
GRMZM2G106950	-6.5	-6.5	-3.90575	-2.8		indole-3-glycerol phosphate synthase				AT5G48220		Aldolase-type TIM barrel family protein		LOC_Os09g08130.2
GRMZM2G150011		-6.5				zinc finger, C2H2 type family protein		C2H2		AT1G13290	DOT5,WIP6	C2H2-like zinc finger protein		LOC_Os09g13680.1
GRMZM5G881969		-6.5								AT5G45480		Protein of unknown function (DUF594)		LOC_Os02g33890.1
GRMZM2G067238		-6.5				hypothetical protein LOC100275230				AT4G31330		Protein of unknown function, DUF599		LOC_Os08g40940.1
GRMZM2G013299	-5	-6.4	-3.68281			glutathione peroxidase activity				AT4G11600	ATGPX6,GPX6,LSC803,PHGPX	glutathione peroxidase 6		LOC_Os02g44500.1
GRMZM2G372156	-7.1	-6.3												LOC_Os05g07700.3
GRMZM2G059689		-6.3												LOC_Os04g50176.1
GRMZM2G327357	-7.3	-6.2	-5.85484			Full-length cDNA clone ZM_BFb0334E14
GRMZM2G070255		-6.2				hypothetical protein LOC100382175				AT5G16250				LOC_Os04g41900.1
GRMZM5G852794		-6.2				Clone 706472 mRNA sequence
GRMZM2G064406	-3.2	-6.1	-6.34909	-4.1		terpene synthase 3				AT1G61680	ATTPS14,TPS14	terpene synthase 14		LOC_Os02g02930.1
GRMZM2G078279	-3.1	-6	-2.03087			Putative uncharacterized protein								LOC_Os04g44780.1
GRMZM2G376957	-1.8	-6	-3.8221			Histone H3.2				AT1G09200		Histone superfamily protein		LOC_Os04g34240.1
GRMZM2G448701	-3.3	-6				homoiothermy				AT2G42110				LOC_Os03g03630.1
GRMZM2G066049		-6				agmatine coumaroyltransferase				AT1G31490		HXXXD-type acyl-transferase family protein		LOC_Os11g42480.1
GRMZM2G348863	-6	-5.9	-5.72754	-3.6						AT5G24860	ATFPF1,FPF1	flowering promoting factor 1		LOC_Os07g47450.1
GRMZM2G138589	-3.3	-5.9	-2.02119	-2.9		LOC100284344				AT3G18830	ATPLT5,ATPMT5,PMT5	polyol/monosaccharide transporter 5		LOC_Os03g10090.1
GRMZM5G864903	-7.4	-5.9	-7.7346			monooxygenase activity				AT2G46950	CYP709B2	cytochrome P450, family 709, subfamily B, polypeptide 2		LOC_Os01g24780.1
GRMZM2G012923	-3.5	-5.8	-3.72139	-3.2		transporter activity				AT4G35300	TMT2	tonoplast monosaccharide transporter2		LOC_Os02g13560.1
GRMZM2G001977	-5.9	-5.8	-8.71355	-3		metabolic process				AT1G47480		alpha/beta-Hydrolases superfamily protein		LOC_Os09g28690.1
GRMZM2G063909	-4.5	-5.8	-4.68626	-2.9		tricarboxylic acid cycle				AT2G44350	ATCS,CSY4	Citrate synthase family protein		LOC_Os11g33240.1
GRMZM2G044851	-1.7	-5.8	-4.10838	-2.6		transporter activity				AT1G32450	NRT1.5	nitrate transporter 1.5		LOC_Os02g46460.1
GRMZM2G172945	-3.5	-5.8				hypothetical protein LOC100277325								LOC_Os07g29190.1
GRMZM2G180547	-2.7	-5.7		-7.2		Clone 454332 mRNA sequence				AT5G09220	AAP2	amino acid permease 2		LOC_Os11g09020.1
GRMZM2G131937	-3.6	-5.6		-4.5		DNA binding		MYB		AT3G28910	ATMYB30,MYB30	myb domain protein 30		LOC_Os08g33940.1
GRMZM2G363520	-2.7	-5.6	-2.37217	-2.8		RING-H2 finger protein ATL2L				AT4G30370		RING/U-box superfamily protein		LOC_Os02g08200.1
GRMZM2G063756	-4.3	-5.6	-3.06685			monooxygenase activity				AT3G48280	CYP71A25	cytochrome P450, family 71, subfamily A, polypeptide 25		LOC_Os08g01510.1
GRMZM2G067624	-2.4	-5.6				DNA binding		SBP		AT1G53160	SPL4	squamosa promoter binding protein-like 4		LOC_Os07g32170.1
GRMZM2G066044		-5.6				Full-length cDNA clone ZM_BFc0183C09				AT5G62170				LOC_Os04g01610.1
GRMZM2G363971	-7.1	-5.5	-6.4502	-5.3		Transcribed locus, strongly similar to NP_001143295.1 hypothetical protein LOC100275836 [Zea mays]								LOC_Os08g09290.1
GRMZM2G058310	-5.7	-5.5	-4.35235	-4.8		beta amylase5				AT4G15210	AT-BETA-AMY,ATBETA-AMY,BAM5,BMY1,RAM1	beta-amylase 5		LOC_Os07g35940.1
GRMZM2G062531	-5.6	-5.5	-3.28163	-2.5		hypothetical protein LOC100217119				AT4G12110	ATSMO1,ATSMO1-1,SMO1-1	sterol-4alpha-methyl oxidase 1-1		LOC_Os10g39810.1
GRMZM2G157252	-2.9	-5.5				Full-length cDNA clone ZM_BFb0143M24				AT5G37010				LOC_Os02g42560.1
GRMZM2G029314		-5.5				hypothetical protein LOC100383269				AT4G17000				LOC_Os03g56070.1
GRMZM5G872392	-5	-5.4	-4.83177	-4.1		structural constituent of ribosome				AT5G13170	SAG29	senescence-associated gene 29		LOC_Os02g30910.1
GRMZM2G046615	-2.7	-5.4		-3.7		terpene synthase 2				AT1G61680	ATTPS14,TPS14	terpene synthase 14		LOC_Os02g02930.1
GRMZM2G056500	-3.8	-5.4	-3.17044	-2.7		Transcribed locus, strongly similar to NP_001143004.1 hypothetical protein LOC100275466 [Zea mays]
GRMZM2G125648	-1.2	-5.4	-2.23386			nucleosome/chromatin assembly factor D		HMG		AT5G23420	HMGB6	high-mobility group box 6		LOC_Os08g01100.1
GRMZM2G078472	-7.7	-5.4	-2.58726			asparagine synthase (glutamine-hydrolyzing) activity				AT5G65010	ASN2	asparagine synthetase 2		LOC_Os03g18130.1
GRMZM2G115329	-1.9	-5.4	-5.2946			hypothetical protein LOC100275144				AT3G18050				LOC_Os06g30210.1
GRMZM2G143253		-5.4				rac GTPase activating protein				AT4G03100		Rho GTPase activating protein with PAK-box/P21-Rho-binding domain		LOC_Os07g22580.1
GRMZM2G108698	-9.3	-5.3		-4.4		monooxygenase activity				AT5G07990	CYP75B1,D501,TT7	Cytochrome P450 superfamily protein		LOC_Os09g26960.1
GRMZM2G044882	-3.5	-5.3	-5.27121	2.2		hypothetical protein LOC100280267				AT5G18430		GDSL-like Lipase/Acylhydrolase superfamily protein		LOC_Os02g40440.1
GRMZM2G323499	-3.3	-5.3	-4.11386			nucleic acid binding				AT3G19090		RNA-binding protein		LOC_Os07g01260.1
GRMZM2G443332	-6.4	-5.3				hypothetical protein LOC100275268				AT4G21060		Galactosyltransferase family protein		LOC_Os04g53180.1
GRMZM2G088242		-5.3				AT-HSFB4		HSF		AT1G46264	AT-HSFB4,HSFB4,SCZ	heat shock transcription factor B4		LOC_Os09g28200.1
GRMZM2G085035		-5.3				G-protein coupled receptor activity				AT2G36026		Ovate family protein		LOC_Os01g64430.1
GRMZM2G341159		-5.3				RING-H2 finger protein ATL3C				AT1G49210		RING/U-box superfamily protein		LOC_Os01g64620.1
GRMZM2G161569	-3.3	-5.2		-3.6		inositol or phosphatidylinositol phosphatase activity		TRAF		AT5G19000	ATBPM1,BPM1	BTB-POZ and MATH domain 1		LOC_Os08g13030.1
GRMZM2G164945	-3.7	-5.2	-3.82147	-2.7		alpha-L-fucosidase activity				AT2G28100	ATFUC1,FUC1	alpha-L-fucosidase 1		LOC_Os09g34920.1
GRMZM5G898274	-10.4	-5.2	-3.59427											LOC_Os05g30500.1
GRMZM2G115825		-5.2	-4.27617							AT3G58650				LOC_Os03g19080.3
GRMZM2G116632	-2.7	-5.2	-5.29497			early nodulin 20				AT2G32300	UCC1	uclacyanin 1		LOC_Os01g57690.1
GRMZM2G130232	-2.9	-5.1	-3.07807	-5.6		hypothetical protein LOC100192612								LOC_Os10g25060.1
GRMZM2G150363	-8.2	-5.1	-7.17912	-3.3		ciliary or flagellar motility				AT4G19170	CCD4,NCED4	nine-cis-epoxycarotenoid dioxygenase 4		LOC_Os02g47510.1
GRMZM2G142345	-5.1	-5.1	-5.05649	-3.1		protein binding				AT5G07270	XBAT33	XB3 ortholog 3 in Arabidopsis thaliana		LOC_Os06g03800.1
GRMZM2G359298	-4	-5.1	-2.03483	-2.3		copper ion binding				AT4G12290		Copper amine oxidase family protein		LOC_Os04g20164.1
GRMZM5G864735	-1.4	-5.1	-2.5671			Histone H3.2				AT1G09200		Histone superfamily protein		LOC_Os04g34240.1
GRMZM2G333183	-2.7	-5.1	-3.19901			nucleotide binding				AT2G36910	ABCB1,ATPGP1,PGP1	ATP binding cassette subfamily B1		LOC_Os08g05690.1
AC233853.1_FG002		-5.1	-4.11386							AT3G58120.1	ATBZIP61,BZIP61	Basic-leucine zipper (bZIP) transcription factor family protein		LOC_Os01g11350.1
GRMZM2G030009	-1.8	-5.1	-4.17384			hypothetical protein LOC100275301								LOC_Os04g52880.1
GRMZM2G041352	-5.4	-5.1	-4.30364			nuclease PA3				AT1G68290	ENDO 2	endonuclease 2		LOC_Os01g03740.1
GRMZM2G073003	-2.4	-5.1	-7.76921			cyclin IaZm				AT5G06150	CYC1BAT,CYCB1;2	Cyclin family protein		LOC_Os01g59120.1
GRMZM2G168588	-2.8	-5.1				cell wall macromolecule catabolic process				AT2G17120	LYM2	lysm domain GPI-anchored protein 2 precursor		LOC_Os09g37600.1
GRMZM2G085381	-4.6	-5.1				benzoxazinless1				AT4G02610		Aldolase-type TIM barrel family protein		LOC_Os03g58300.1
GRMZM2G129403	-5.3	-5.1				transferase activity, transferring acyl groups other than amino-acyl groups				AT5G48930	HCT	hydroxycinnamoyl-CoA shikimate/quinate hydroxycinnamoyl transferase		LOC_Os09g25460.1
GRMZM2G077776	-7.5	-5.1				aspartic-type endopeptidase activity				AT3G54400		Eukaryotic aspartyl protease family protein		LOC_Os01g72510.1
GRMZM2G147544	-4.2	-5	-4.77742	-4.3		hypothetical protein LOC100275415				AT2G29670		Tetratricopeptide repeat (TPR)-like superfamily protein		LOC_Os01g63620.1
GRMZM2G070508	-2.3	-5	-3.40822	-2.8		hypothetical protein LOC100279319				AT2G26170	CYP711A1,MAX1	cytochrome P450, family 711, subfamily A, polypeptide 1		LOC_Os02g12890.1
GRMZM2G402417	-1.5	-5				Putative uncharacterized protein				AT1G19715		Mannose-binding lectin superfamily protein		LOC_Os12g09700.1
GRMZM5G815154	-4.5	-5				hypothetical protein LOC100384660
GRMZM2G343149	-3.9	-4.9	-2.75142	-4.4		dnaJ domain containing protein				AT5G23240		DNAJ heat shock N-terminal domain-containing protein		LOC_Os04g57880.1
GRMZM2G094990	-4.2	-4.9	-3.24354	-4.2		beta-expansin 1a				AT1G65680	ATEXPB2,ATHEXP BETA 1.4,EXPB2	expansin B2		LOC_Os10g40720.1
GRMZM2G179810	-7	-4.9	-7.02524	-4		Putative uncharacterized protein				AT1G80050	APT2,ATAPT2,PHT1.1	adenine phosphoribosyl transferase 2		LOC_Os02g40010.1
GRMZM2G105189	-2.9	-4.9		-3.6		anther-specific proline-rich protein APG				AT5G55050		GDSL-like Lipase/Acylhydrolase superfamily protein		LOC_Os03g38470.1
GRMZM2G168365	-4.8	-4.9	-3.08799	-2.6		LOC100282648				AT5G13170	SAG29	senescence-associated gene 29		LOC_Os02g30910.1
GRMZM2G172491	-4	-4.9	-3.30507	-1.9		Cytochrome P450 71C1				AT3G48290	CYP71A24	cytochrome P450, family 71, subfamily A, polypeptide 24		LOC_Os08g01450.1
GRMZM2G421463	-3.4	-4.9	-3.61067			magnesium ion binding				AT1G21880	LYM1	lysm domain GPI-anchored protein 1 precursor		LOC_Os09g27890.1
GRMZM2G153488	-1.5	-4.9				LOC100280611				AT2G02100	LCR69,PDF2.2	low-molecular-weight cysteine-rich 69		LOC_Os02g41904.1
GRMZM2G030768		-4.9				hypothetical protein LOC100383801		SNF2		AT5G43530		Helicase protein with RING/U-box domain		ChrUn.fgenesh.mRNA.85
GRMZM2G007057		-4.9				small conjugating protein ligase activity				AT3G20060	UBC19	ubiquitin-conjugating enzyme19		LOC_Os01g16650.1
GRMZM2G101818	-3.6	-4.8	-3.17526	-4.1		Full-length cDNA clone ZM_BFc0042M19				AT1G30260				LOC_Os08g09290.1
EF517601.1_FG016		-4.8	-4.16309	3.1										LOC_Os01g14850.1
GRMZM2G167649	-1.8	-4.8	-2.3217			hypothetical protein LOC100274631
GRMZM2G481194	-1.5	-4.8	-2.37044			extracellular region				AT5G66590		CAP (Cysteine-rich secretory proteins, Antigen 5, and Pathogenesis-related 1 protein) superfamily protein		LOC_Os01g28500.1
AC217910.3_FG004	-2.1	-4.8								AT5G54300.1		Protein of unknown function (DUF761)		LOC_Os08g31090.1
GRMZM2G138886		-4.8				cyclin B2				AT1G20610	CYCB2;3	Cyclin B2;3		LOC_Os04g47580.1
GRMZM2G039408		-4.8				transporter activity				AT3G18830	ATPLT5,ATPMT5,PMT5	polyol/monosaccharide transporter 5		LOC_Os11g41850.1
GRMZM2G047762		-4.8				zinc ion transmembrane transporter activity				AT3G12750	ZIP1	zinc transporter 1 precursor		LOC_Os05g39560.1
GRMZM2G129453	-2.9	-4.7	-3.3691	-2.3		hypothetical protein LOC100191970				AT2G46210		Fatty acid/sphingolipid desaturase		LOC_Os09g16920.1
GRMZM2G075260	-2.7	-4.7	-1.92518			hypothetical protein LOC100381837				AT1G70280		NHL domain-containing protein		LOC_Os02g49770.1
GRMZM2G105587	-1	-4.7	-2.6645			membrane								LOC_Os01g14850.1
GRMZM2G422641	-3.7	-4.7	-6.6328			nucleotide binding				AT2G22560		Kinase interacting (KIP1-like) family protein		LOC_Os05g39000.1
GRMZM2G060253	-3.5	-4.7				hypothetical protein LOC100277069		HMG		AT4G23800		HMG (high mobility group) box protein		LOC_Os02g15810.1
GRMZM2G169951	-4.8	-4.6	-4.63654	-4.9		integral to membrane				AT5G24030	SLAH3	SLAC1 homologue 3		LOC_Os01g12680.1
GRMZM2G345717	-2.7	-4.6	-3.41371	-4.2		anthocyaninless2				AT4G22880	ANS,LDOX,TDS4,TT18	leucoanthocyanidin dioxygenase		LOC_Os01g27490.1
GRMZM2G047124	-4.4	-4.6	-3.98855	-4		hypothetical protein LOC100381914 (LOC100381914), mRNA				AT5G57780				LOC_Os08g31950.1
GRMZM2G062577	-1.2	-4.6	-1.64404			anther-specific proline-rich protein APG				AT1G71691		GDSL-like Lipase/Acylhydrolase superfamily protein		LOC_Os05g34700.1
GRMZM2G076239	-3.5	-4.6	-2.15184			oxidoreductase activity				AT4G18360		Aldolase-type TIM barrel family protein		LOC_Os04g53210.1
GRMZM2G063550	-3.7	-4.6	-2.22094			anthocyanidin 5,3-O-glucosyltransferase				AT3G21790		UDP-Glycosyltransferase superfamily protein		LOC_Os07g32060.1
GRMZM2G345776	-2.8	-4.6												LOC_Os10g37290.1
GRMZM2G157616	-3.3	-4.6				ATP binding protein				AT1G18550		ATP binding microtubule motor family protein		LOC_Os01g42070.1
GRMZM2G032547		-4.6								AT5G57130		Clp amino terminal domain-containing protein		LOC_Os04g23220.1
GRMZM2G034958		-4.6				lipid metabolic process				AT1G71691		GDSL-like Lipase/Acylhydrolase superfamily protein		LOC_Os08g02094.1
GRMZM2G033785		-4.6				microtubule motor activity				AT1G59540	ZCF125	P-loop containing nucleoside triphosphate hydrolases superfamily protein		LOC_Os11g35090.1
GRMZM2G170400	-3.1	-4.5	-3.0989	-6.7		hypothetical protein LOC100383478				AT3G18000	NMT1,PEAMT,XPL1	S-adenosyl-L-methionine-dependent methyltransferases superfamily protein		LOC_Os05g47540.1
GRMZM2G133684	-4.7	-4.5	-3.56827	-4.9		Putative uncharacterized protein				AT5G62720		Integral membrane HPP family protein		LOC_Os03g48030.1
GRMZM2G168898	-2	-4.5	-1.51566	-3.8		hemoglobin 2				AT2G16060	AHB1,ARATH GLB1,ATGLB1,GLB1,HB1,NSHB1	hemoglobin 1		LOC_Os05g44140.1
GRMZM2G456422	-3.3	-4.5		-2.7		Hypothetical protein LOC100277241				AT3G05858				LOC_Os02g37070.1
GRMZM2G401581	-1.4	-4.5	-2.39344			Histone H3.2				AT1G09200		Histone superfamily protein		LOC_Os04g34240.1
GRMZM5G805382		-4.5	-3.47223			homoiothermy
GRMZM2G010912		-4.5				hypothetical protein LOC100280405 (LOC100280405), mRNA				AT5G10890		myosin heavy chain-related		LOC_Os02g55190.1
GRMZM2G006287	-3.4	-4.4	-3.70113	-4.3		LOC100192099				AT1G78160	APUM7,PUM7	pumilio 7		LOC_Os12g31000.1
GRMZM5G822829	-4.3	-4.4	-4.19959	-3.6		nucleus				AT1G63650	ATMYC-2,EGL1,EGL3	basic helix-loop-helix (bHLH) DNA-binding superfamily protein		LOC_Os04g47080.1
GRMZM2G108609	-5.7	-4.4		-3.4		Transcribed locus
GRMZM2G476523	-1.5	-4.4	-2.04652			LOC100281263				AT1G73620		Pathogenesis-related thaumatin superfamily protein		LOC_Os06g47600.1
GRMZM2G099642	-2.3	-4.4	-3.76315			zinc ion binding				AT5G17000		Zinc-binding dehydrogenase family protein		LOC_Os06g40070.1
GRMZM2G114948	-1.7	-4.4								AT3G50170		Plant protein of unknown function (DUF247)		LOC_Os11g34090.1
GRMZM2G006841		-4.4												LOC_Os04g24478.1
GRMZM2G440543		-4.4				F-box protein GID2				AT5G48170	SLY2	F-box family protein		LOC_Os03g10040.1
GRMZM2G026930	-1.4	-4.3	-2.85797	-4.2		dihydroflavonol-4-reductase				AT5G42800	DFR,M318,TT3	dihydroflavonol 4-reductase		LOC_Os01g44260.1
GRMZM2G049541	-4.3	-4.3	-5.10562	-3.1		phosphoenolpyruvate carboxylase kinase 4				AT1G08650	ATPPCK1,PPCK1	phosphoenolpyruvate carboxylase kinase 1		LOC_Os02g41580.1
GRMZM2G172734	-1.5	-4.3	-2.08212			hypothetical protein LOC100275711				AT5G45470		Protein of unknown function (DUF594)		LOC_Os06g02960.1
GRMZM2G123973		-4.3	-3.27593			hypothetical protein LOC100382128				AT5G19700		MATE efflux family protein		LOC_Os09g35600.1
GRMZM2G037545	-3.6	-4.3	-3.3335			hypothetical protein LOC100217043				AT2G15490	UGT73B4	UDP-glycosyltransferase 73B4		LOC_Os05g42040.1
GRMZM2G147346	-2.4	-4.3	-3.68766			hypothetical protein LOC100384616		MYB		AT3G23250	ATMYB15,ATY19,MYB15	myb domain protein 15		LOC_Os10g33810.1
GRMZM2G041636	-2.4	-4.3				hypothetical protein LOC100277082				AT1G09250		basic helix-loop-helix (bHLH) DNA-binding superfamily protein		LOC_Os03g19780.1
GRMZM2G130625	-2.7	-4.3				hypothetical protein LOC100217098				AT3G12870				LOC_Os03g56700.1
GRMZM5G885045	-3.1	-4.3				protein binding				AT1G20823		RING/U-box superfamily protein		LOC_Os02g58540.1
GRMZM2G114113		-4.3				calcium ion binding				AT5G17160				LOC_Os02g47130.1
GRMZM2G177596		-4.3				hypothetical protein LOC100191331				AT4G02800				LOC_Os04g15800.1
GRMZM2G009913		-4.3				Transcribed locus				AT2G33560	BUBR1	BUB1-related (BUB1: budding uninhibited by benzymidazol 1)		LOC_Os02g10020.1
GRMZM2G026346		-4.3				iron ion transmembrane transporter activity				AT1G47230	CYCA3;4	CYCLIN A3;4		LOC_Os03g41100.1
GRMZM2G165755		-4.3				hypothetical protein LOC100193114				AT2G42260	PYM,UVI4	uv-b-insensitive 4		LOC_Os04g39670.1
GRMZM2G081666	-6.5	-4.2	-5.2428	-6.2		potassium channel3				AT5G46240	KAT1	potassium channel in Arabidopsis thaliana 1		LOC_Os02g14840.1
GRMZM2G060311	-6	-4.2	-3.87173	-3.9		low temperature and salt responsive protein				AT4G28088		Low temperature and salt responsive protein family		LOC_Os06g44220.1
GRMZM2G135839	-4.5	-4.2	-4.82948	-3.1		hydrolase activity				AT4G11800		Calcineurin-like metallo-phosphoesterase superfamily protein		LOC_Os07g01540.1
GRMZM2G312732	-3.2	-4.2	-2.64111	-2.8		hypothetical protein LOC100279071								LOC_Os06g09600.1
GRMZM2G312736	-3.1	-4.2	-3.00198	-2.7		homoiothermy								LOC_Os06g09600.1
GRMZM2G109843	-2.6	-4.2	-2.74706	-2.4		LOC100280531				AT3G50530	CRK	CDPK-related kinase		LOC_Os07g42770.1
GRMZM2G071343	-5.1	-4.2	-1.95415			oxidoreductase activity				AT5G13700	APAO,ATPAO1,PAO1	polyamine oxidase 1		LOC_Os09g20284.1
GRMZM2G066153		-4.2	-2.51542			phosphoribosylanthranilate transferase				AT1G22610		C2 calcium/lipid-binding plant phosphoribosyltransferase family protein		LOC_Os05g35480.1
GRMZM2G361855	-5.1	-4.2	-3.45004							AT5G27740	EMB161,EMB251,EMB2775,RFC3	ATPase family associated with various cellular activities (AAA)		LOC_Os10g42400.1
GRMZM2G151913	-1.9	-4.2				lysosphingolipid and lysophosphatidic acid receptor activity				AT5G40250		RING/U-box superfamily protein		LOC_Os06g08820.1
GRMZM2G055435		-4.2				hypothetical protein LOC100384786				AT5G42860				LOC_Os02g44740.1
GRMZM2G082627		-4.2				hypothetical protein LOC100275021								LOC_Os02g24240.1
GRMZM2G478779		-4.2				protein binding				AT3G12110	ACT11	actin-11		LOC_Os03g50885.1
GRMZM5G883764		-4.2				nucleosome				AT1G54690	G-H2AX,GAMMA-H2AX,H2AXB,HTA3	gamma histone variant H2AX		LOC_Os03g51200.1
GRMZM2G131409		-4.2				hypothetical protein LOC100278076				AT1G56580	SVB	Protein of unknown function, DUF538		LOC_Os12g37650.1
GRMZM2G460544		-4.2				DNA binding				AT2G42200	SPL9	squamosa promoter binding protein-like 9		LOC_Os08g39890.1
GRMZM2G074631	-2.6	-4.1	-2.7899	-2.2		hypothetical protein LOC100382397				AT4G34131	UGT73B3	UDP-glucosyl transferase 73B3		LOC_Os05g42040.1
GRMZM2G163406	-4.5	-4.1	-2.7915	-2.1		Full-length cDNA clone ZM_BFc0047K05				AT1G19715		Mannose-binding lectin superfamily protein		LOC_Os12g14440.1
GRMZM2G085854	-3	-4.1		-2		hydroquinone glucosyltransferase				AT1G01420	UGT72B3	UDP-glucosyl transferase 72B3		LOC_Os11g38650.1
GRMZM2G007953	-4.5	-4.1	-3.15464			hypothetical protein LOC100279417				AT1G75500	WAT1	Walls Are Thin 1		LOC_Os08g44750.1
GRMZM2G162333	-3.2	-4.1	-3.7718			cell wall				AT5G47500		Pectin lyase-like superfamily protein		LOC_Os04g46740.1
GRMZM2G006505	-2.2	-4.1	-3.78207			DNA binding				AT1G68400		leucine-rich repeat transmembrane protein kinase family protein		LOC_Os07g38640.1
GRMZM2G145753	-1.8	-4.1	-3.91358			hypothetical protein LOC100274594				AT3G56370		Leucine-rich repeat protein kinase family protein		LOC_Os01g60670.1
GRMZM2G384780	-1.9	-4.1	-9.19402			lipid metabolic process				AT5G33370		GDSL-like Lipase/Acylhydrolase superfamily protein		LOC_Os02g57110.1
GRMZM2G086934	-1.9	-4.1				hypothetical protein LOC100273584				AT5G08020	ATRPA70B,RPA70B	RPA70-kDa subunit B		LOC_Os03g11540.1
GRMZM2G307588	-1.9	-4.1				DNA binding				AT2G42200	SPL9	squamosa promoter binding protein-like 9		LOC_Os09g31438.1
GRMZM2G066274	-2.4	-4.1				protein kinase activity				AT3G51740	IMK2	inflorescence meristem receptor-like kinase 2		LOC_Os03g18630.1
GRMZM2G333042		-4.1				hypothetical protein LOC100277794								LOC_Os09g36850.1
GRMZM2G301194		-4.1				hypothetical protein LOC100381510				AT3G44730	ATKP1,KP1	kinesin-like protein 1		LOC_Os12g36100.1
GRMZM2G004012		-4.1				LOC100273187				AT2G02850	ARPN	plantacyanin		LOC_Os03g50140.1
GRMZM2G117246	-8.1	-4		-6.9		iron ion binding				AT3G11180		2-oxoglutarate (2OG) and Fe(II)-dependent oxygenase superfamily protein		LOC_Os03g18030.1
GRMZM2G387394	-2.4	-4	-3.58492	-4.2		transferase				AT5G39050		HXXXD-type acyl-transferase family protein		LOC_Os02g28300.1
AC212023.4_FG004	-5.6	-4	-3.44265	-3.3						AT1G62760.1		Plant invertase/pectin methylesterase inhibitor superfamily protein		LOC_Os10g36500.1
GRMZM2G408038	-4.4	-4		-3.2		aminopeptidase activity				AT3G10450	SCPL7	serine carboxypeptidase-like 7		LOC_Os11g27264.1
AC197705.4_FG011	-4.7	-4	-4.73078	-3.1						AT3G56040.1	UGP3	UDP-glucose pyrophosphorylase 3		LOC_Os05g39230.1
GRMZM2G046163	-2.6	-4	-3.337	-2.2		LOC100273163				AT4G02610		Aldolase-type TIM barrel family protein		LOC_Os03g58300.1
GRMZM2G033915	-2.2	-4	-2.44223			hypothetical protein LOC100275489		Orphans		AT2G42040				LOC_Os02g53360.1
GRMZM2G158447	-2.1	-4	-2.52068			Putative uncharacterized protein								LOC_Os07g38470.1
GRMZM2G413943		-4	-2.59169							AT5G09220	AAP2	amino acid permease 2		LOC_Os12g08130.1
GRMZM2G014356	-2.6	-4	-2.9731			hypothetical protein LOC100275534								LOC_Os02g33790.1
GRMZM2G050561	-3.6	-4	-3.56943			LOC100191658				AT4G37680	HHP4	heptahelical protein 4		LOC_Os12g32640.1
GRMZM5G882078		-4	-3.69533			protein kinase activity				AT2G43850		Integrin-linked protein kinase family		LOC_Os01g66860.2
GRMZM2G354253	-2.5	-4	-3.73075			hypothetical protein LOC100280380								LOC_Os02g56490.1
GRMZM2G168603	-1.6	-4	-4.31814			protein kinase activity				AT4G28650		Leucine-rich repeat transmembrane protein kinase family protein		LOC_Os02g02140.1
AC210003.2_FG004	-1.5	-4	-4.65619							AT2G18980.1		Peroxidase superfamily protein		LOC_Os04g56180.1
GRMZM2G323679	-1.4	-4				hypothetical protein LOC100192012				AT3G27060	ATTSO2,TSO2	Ferritin/ribonucleotide reductase-like family protein		LOC_Os06g14620.1
GRMZM2G097989	-3	-4				glutathione transferase41				AT3G09270	ATGSTU8,GSTU8	glutathione S-transferase TAU 8		LOC_Os05g34150.1
AC209819.3_FG005	-3.3	-4								AT4G35150.1		O-methyltransferase family protein		LOC_Os12g25450.1
GRMZM2G005715		-4				hypothetical protein LOC100277515				AT5G36710				LOC_Os01g67110.1
GRMZM2G042013		-4				hypothetical protein LOC100277661 (LOC100277661), mRNA
GRMZM2G059088	-3.3	-3.9	-3.3817	-3.1		hypothetical protein LOC100275411				AT5G14010	KNU	C2H2 and C2HC zinc fingers superfamily protein		LOC_Os07g05900.1
GRMZM2G314094	-4	-3.9	-3.29476	-2.8		6-phosphofructokinase activity				AT1G76550		Phosphofructokinase family protein		LOC_Os06g22060.1
GRMZM2G344339	-2.8	-3.9	-2.8698	-2.7		hypothetical protein LOC100278865				AT1G22680
GRMZM2G021560	-3.4	-3.9	-3.34528	-2.4		ZCN25 protein				AT1G65480	FT	PEBP (phosphatidylethanolamine-binding protein) family protein		LOC_Os04g41130.1
GRMZM2G140805		-3.9		-1.9		nodulin-like protein				AT5G07050		nodulin MtN21 /EamA-like transporter family protein		LOC_Os05g41420.1
GRMZM2G179005		-3.9	-1.90405			Histone H3.2				AT1G09200		Histone superfamily protein		LOC_Os04g34240.1
GRMZM2G119071		-3.9	-2.37081			histone2b2				AT3G45980	H2B,HTB9	Histone superfamily protein		LOC_Os03g17084.1
GRMZM2G014009	-2.6	-3.9	-2.49374			hypothetical protein LOC100276205				AT5G47060		Protein of unknown function (DUF581)		LOC_Os04g49620.1
GRMZM2G019806	-3.4	-3.9	-3.48701			hypothetical protein LOC100194106		bHLH		AT4G37850		basic helix-loop-helix (bHLH) DNA-binding superfamily protein		LOC_Os03g51580.1
GRMZM2G107711		-3.9	-4.14987			hypothetical protein LOC100275512								LOC_Os04g52880.1
GRMZM2G126397	-1.1	-3.9	-4.37004			nonspecific lipid-transfer protein				AT5G01870		Bifunctional inhibitor/lipid-transfer protein/seed storage 2S albumin superfamily protein		LOC_Os01g60740.1
GRMZM2G333923	-1.7	-3.9	-4.97077							AT3G02430		Protein of unknown function (DUF679)		LOC_Os01g28089.1
GRMZM2G002830	-3.1	-3.9				ubiquitin-conjugating enzyme X				AT3G20060	UBC19	ubiquitin-conjugating enzyme19		LOC_Os01g16650.1
GRMZM2G149446		-3.9				glycine-rich cell wall structural protein 2								LOC_Os10g31540.1
GRMZM2G008406		-3.9				pathogenesis-related protein PR-1				AT4G25780		CAP (Cysteine-rich secretory proteins, Antigen 5, and Pathogenesis-related 1 protein) superfamily protein		LOC_Os02g54560.1
GRMZM2G056231		-3.9				hypothetical protein LOC100273753				AT3G54560	HTA11	histone H2A 11		LOC_Os03g53190.1
GRMZM2G078314		-3.9				nucleosome				AT1G09200		Histone superfamily protein		LOC_Os04g34240.1
GRMZM2G099802		-3.9				LOC100193489				AT3G04290	ATLTL1,LTL1	Li-tolerant lipase 1		LOC_Os04g42860.1
GRMZM2G476049		-3.9				gamma-glutamyltransferase activity				AT1G22400	ATUGT85A1,UGT85A1	UDP-Glycosyltransferase superfamily protein		LOC_Os02g28900.1
GRMZM2G031591	-1.9	-3.8	-2.49087	-3.2		hypothetical protein LOC100278465								LOC_Os07g42650.1
GRMZM2G117608	-3.3	-3.8		-3		cell death				AT4G02600	ATMLO1,MLO1	Seven transmembrane MLO family protein		LOC_Os01g66510.1
GRMZM5G832939	-4.4	-3.8	-3.29883	-2.5		hypothetical protein LOC100274796				AT5G20790				LOC_Os09g26670.1
GRMZM2G158328	-6.2	-3.8	-4.02386	-2.5		WRKY DNA binding domain containing protein		WRKY		AT1G66600	ABO3,ATWRKY63,WRKY63	ABA overly sensitive mutant 3		LOC_Os01g60600.1
GRMZM2G065088	-4	-3.8		-2.1		manganese ion binding				AT1G09560	GLP5	germin-like protein 5		LOC_Os01g72290.1
GRMZM2G338037	-2.3	-3.8	-2.26551	-2		Clone 1487327 mRNA sequence				AT2G37300				LOC_Os03g17500.1
GRMZM2G063342	-1.1	-3.8	-1.90637			metal ion binding protein				AT2G36950		Heavy metal transport/detoxification superfamily protein		LOC_Os03g05750.1
GRMZM2G176270		-3.8	-2.96799			LOC100193417				AT4G01730		DHHC-type zinc finger family protein		LOC_Os12g16210.1
GRMZM2G034797	-3.8	-3.8	-3.37043			protein binding				AT1G74620		RING/U-box superfamily protein		LOC_Os09g36500.1
GRMZM2G148536		-3.8	-3.47228			Putative uncharacterized protein								LOC_Os10g05600.1
GRMZM5G828488	-4.5	-3.8	-3.72382			ids4-like protein				AT2G45130	ATSPX3,SPX3	SPX domain gene 3		LOC_Os03g29250.1
GRMZM2G101872	-3.8	-3.8				copper ion binding				AT3G20570	AtENODL9,ENODL9	early nodulin-like protein 9		LOC_Os02g06690.1
GRMZM2G146034	-5.4	-3.8				nucleotide binding				AT3G28345		ABC transporter family protein		LOC_Os02g09720.1
GRMZM2G465208		-3.8				DNA binding				AT1G65710				LOC_Os04g44640.1
GRMZM2G042101		-3.8				DNA binding protein		bHLH		AT3G28857		basic helix-loop-helix (bHLH) DNA-binding family protein		LOC_Os02g51320.1
GRMZM2G107540		-3.8				nucleosome		CCAAT		AT1G54690	G-H2AX,GAMMA-H2AX,H2AXB,HTA3	gamma histone variant H2AX		LOC_Os12g34510.1
GRMZM2G077227		-3.8				calmodulin binding protein				AT2G26180	IQD6	IQ-domain 6		LOC_Os01g09790.1
GRMZM2G131525		-3.8				syntaxin-related protein KNOLLE				AT1G08560	ATSYP111,KN,SYP111	syntaxin of plants 111		LOC_Os03g52650.1
GRMZM2G117497	-4.8	-3.7	-7.57018	-5.1		LOC100286266				AT4G39250	ATRL1,RL1,RSM2	RAD-like 1		LOC_Os05g49240.1
GRMZM2G028535	-3.5	-3.7	-2.94728	-4.1		LOC100280719				AT3G55610	P5CS2	delta 1-pyrroline-5-carboxylate synthase 2		LOC_Os01g62900.1
GRMZM2G082184	-2.1	-3.7	-6.01644	-3.5		hypothetical protein LOC100192638				AT5G37810	NIP4;1,NLM4	NOD26-like intrinsic protein 4;1		LOC_Os02g51110.1
GRMZM2G140328	-3.2	-3.7	-3.39524	-3.3		catalytic activity				AT5G57110	ACA8,AT-ACA8	autoinhibited Ca2+ -ATPase, isoform 8		LOC_Os04g51610.1
GRMZM2G125072	-3.5	-3.7	-2.52648	-2.8		3Fe-4S ferredoxin				AT5G23240		DNAJ heat shock N-terminal domain-containing protein		LOC_Os06g28050.1
GRMZM2G063162	-4.3	-3.7	-2.36949	-2.5		protein binding				AT2G46240	ATBAG6,BAG6	BCL-2-associated athanogene 6		LOC_Os02g15930.1
GRMZM2G015892	-3.9	-3.7	-2.79336	-2.2		catalytic activity				AT4G02610		Aldolase-type TIM barrel family protein		LOC_Os03g58300.1
AC204611.4_FG001	-2.9	-3.7	-3.34281	-2						AT2G23520.1		Pyridoxal phosphate (PLP)-dependent transferases superfamily protein		LOC_Os11g29630.1
GRMZM2G175761		-3.7	-1.56347			pollen-specific protein SF3		LIM		AT1G10200	WLIM1	GATA type zinc finger transcription factor family protein		LOC_Os12g32620.1
GRMZM2G178229		-3.7	-2.11978			nucleus				AT5G65420	CYCD4;1	CYCLIN D4;1		LOC_Os09g29100.1
GRMZM2G036134	-1.2	-3.7	-2.64498			LOC100191400				AT3G54400		Eukaryotic aspartyl protease family protein		LOC_Os07g46480.1
GRMZM2G030850	-1.7	-3.7	-3.21874			glucan endo-1,3-beta-glucosidase 7				AT1G32860		Glycosyl hydrolase superfamily protein		LOC_Os10g07290.1
GRMZM2G432926	-1.7	-3.7	-3.67546			transporter activity				AT2G37170	PIP2;2,PIP2B	plasma membrane intrinsic protein 2		LOC_Os07g26690.1
GRMZM2G138756	-2.6	-3.7	-3.7168			nucleotide pyrophosphatase/phosphodiesterase				AT4G24890	ATPAP24,PAP24	purple acid phosphatase 24		LOC_Os01g58640.1
GRMZM2G161664	-2.4	-3.7	-3.9968			protein kinase activity				AT5G10020		Leucine-rich receptor-like protein kinase family protein		LOC_Os03g20450.1
GRMZM2G107003	-2.4	-3.7	-4.23598			LOC100280954				AT5G14920		Gibberellin-regulated family protein		LOC_Os04g39110.1
GRMZM2G178074	-2.5	-3.7	-4.52666			calcium-dependent protein kinase, isoform AK1				AT3G04530	ATPPCK2,PEPCK2,PPCK2	phosphoenolpyruvate carboxylase kinase 2		LOC_Os02g56310.1
GRMZM2G067921	-2.3	-3.7	-4.71177			delayed flowering1				AT4G35900	atbzip14,FD,FD-1	Basic-leucine zipper (bZIP) transcription factor family protein		LOC_Os09g36910.1
GRMZM2G104616	-1.7	-3.7	-4.87538			proline-rich protein				AT2G21140	ATPRP2,PRP2	proline-rich protein 2		LOC_Os03g14140.1
GRMZM2G079123	-2.1	-3.7	-5.34936			DNA binding		MYB		AT5G15310	ATMIXTA,ATMYB16,MYB16	myb domain protein 16		LOC_Os08g33660.1
GRMZM2G040965	-2.2	-3.7				AFH1				AT3G25500	AFH1,AHF1,ATFH1,FH1	formin homology 1		LOC_Os09g34180.1
GRMZM2G316778	-2.4	-3.7				hypothetical protein LOC100276859				AT1G64980		Nucleotide-diphospho-sugar transferases superfamily protein		LOC_Os07g23120.1
AC206425.3_FG002	-4.8	-3.7												LOC_Os04g24478.1
GRMZM2G113626	-6.3	-3.7								AT3G15550				LOC_Os01g08150.1
GRMZM2G077612		-3.7								AT3G05858				LOC_Os02g37070.1
GRMZM2G011951		-3.7				uclacyanin-2				AT1G48940	AtENODL6,ENODL6	early nodulin-like protein 6		LOC_Os02g49350.1
GRMZM2G131309		-3.7				catalytic activity				AT2G07560	AHA6,HA6	H(+)-ATPase 6		LOC_Os05g25550.1
GRMZM2G139834		-3.7				hypothetical protein LOC100274152				AT2G39510		nodulin MtN21 /EamA-like transporter family protein		LOC_Os03g05530.1
GRMZM2G467576	-2.8	-3.6	-3.10613	-3.8		protein binding				AT3G10910		RING/U-box superfamily protein		LOC_Os11g02424.1
GRMZM2G021106	-4.6	-3.6	-4.09127	-3.6		metabolic process				AT1G17710		Pyridoxal phosphate phosphatase-related protein		LOC_Os02g13290.1
GRMZM2G152777	-2.3	-3.6	-5.9222	-3.6		hypothetical protein LOC100272736				AT3G16370		GDSL-like Lipase/Acylhydrolase superfamily protein		LOC_Os06g05630.1
GRMZM2G092813	-3.6	-3.6	-2.6347	-3.5		acyl-activating enzyme 11				AT1G65880	BZO1	benzoyloxyglucosinolate 1		LOC_Os03g03790.1
GRMZM2G074083	-3.3	-3.6		-3.4		hypothetical protein LOC100192993								LOC_Os04g05010.1
GRMZM2G032219	-2.2	-3.6	-2.40651	-2.2		cell death				AT2G39200	ATMLO12,MLO12	Seven transmembrane MLO family protein		LOC_Os03g03700.1
GRMZM2G092947	-3.6	-3.6	-4.60127	-2.1		GTPase activator activity				AT4G02710		Kinase interacting (KIP1-like) family protein		LOC_Os12g41200.1
GRMZM2G134846		-3.6		-2.1										LOC_Os05g43860.1
GRMZM2G036918	-2.6	-3.6	-3.44526	-1.7		hypothetical protein LOC100381610				AT2G38650	GAUT7,LGT7	galacturonosyltransferase 7		LOC_Os12g02910.1
GRMZM2G159119	-3.1	-3.6	-2.15107			hypothetical protein LOC100216751		G2-like		AT1G68670		myb-like transcription factor family protein		LOC_Os02g22020.1
GRMZM2G016370	-3.3	-3.6	-2.28913			hypothetical protein LOC100193306		G2-like		AT1G68670		myb-like transcription factor family protein		LOC_Os02g22020.1
GRMZM2G047129	-1.5	-3.6	-2.3088			alpha-L-fucosidase 2				AT1G28600		GDSL-like Lipase/Acylhydrolase superfamily protein		LOC_Os01g42730.1
GRMZM2G165844	-4.3	-3.6	-2.54343			acyl carrier activity				AT1G20480		AMP-dependent synthetase and ligase family protein		LOC_Os04g39780.1
GRMZM2G004334		-3.6	-3.06678			transcription factor activity		HB		AT1G73360	ATHDG11,EDT1,HDG11	homeodomain GLABROUS 11		LOC_Os06g10600.1
GRMZM2G141376	-1.9	-3.6	-3.14502			hypothetical protein LOC100273169				AT5G21105		Plant L-ascorbate oxidase		LOC_Os06g37080.1
GRMZM2G014571	-4.2	-3.6	-3.28417			protein binding				AT2G42360		RING/U-box superfamily protein		LOC_Os01g11500.1
GRMZM2G319123	-1.1	-3.6	-3.49926							AT5G45530		Protein of unknown function (DUF594)		LOC_Os07g16930.1
GRMZM2G025718	-1.6	-3.6	-3.58187			cell adhesion
GRMZM2G076905	-3.2	-3.6	-3.7718			Transcribed locus, moderately similar to XP_002449446.1 hypothetical protein SORBIDRAFT_05g012520 [Sorghum bicolor]				AT3G25130				LOC_Os11g26990.1
GRMZM2G009818	-2.8	-3.6	-4.20752			protein kinase activity				AT4G28650		Leucine-rich repeat transmembrane protein kinase family protein		LOC_Os03g05140.1
GRMZM2G169967	-1.9	-3.6	-4.47154			beta-expansin 3				AT4G28250	ATEXPB3,ATHEXP BETA 1.6,EXPB3	expansin B3		LOC_Os02g42650.1
GRMZM2G127635	-2.4	-3.6	-5.15782			hypothetical protein LOC100192806				AT4G33800				LOC_Os03g10260.1
GRMZM2G025429	-2	-3.6				product:isopentenyl transferase IPT8				AT1G68460	ATIPT1,IPT1	isopentenyltransferase 1		LOC_Os05g47840.1
GRMZM2G305311		-3.6				hypothetical protein LOC100274528								LOC_Os04g35580.1
GRMZM2G450866		-3.6												LOC_Os01g24080.1
GRMZM5G817395		-3.6				kinesin-4								LOC_Os05g33030.1
GRMZM2G171248		-3.6				hypothetical protein LOC100277883				AT1G05440		C-8 sterol isomerases		LOC_Os03g53580.1
GRMZM2G135536		-3.6				transposon protein				AT1G64940	CYP89A6	cytochrome P450, family 87, subfamily A, polypeptide 6		LOC_Os10g05020.1
GRMZM2G084195		-3.6				histone H4				AT5G59970		Histone superfamily protein		LOC_Os04g49420.1
GRMZM2G028813		-3.6				Transcribed locus, moderately similar to XP_002463771.1 hypothetical protein SORBIDRAFT_01g005870 [Sorghum bicolor]				AT3G22190	IQD5	IQ-domain 5		LOC_Os03g57330.1
GRMZM2G038303		-3.6				nuclear transcription factor Y subunit A-3		CCAAT		AT1G72830	ATHAP2C,HAP2C,NF-YA3	nuclear factor Y, subunit A3		LOC_Os07g41720.1
AC216793.3_FG008		-3.6								AT1G30840.1	ATPUP4,PUP4	purine permease 4		LOC_Os01g48800.1
GRMZM2G100454	-4.5	-3.5	-3.39077	-3.1		protein kinase activity				AT5G56790		Protein kinase superfamily protein		LOC_Os01g65940.1
GRMZM2G147787	-4.8	-3.5	-4.40672	-3.1		dopamine receptor activity								LOC_Os03g13870.1
GRMZM2G150260	-3.4	-3.5	-2.42625	-3		LOC100284746		MYB-related		AT1G75250	ATRL6,RL6,RSM3	RAD-like 6		LOC_Os01g44390.2
GRMZM2G050234	-2	-3.5	-3.38621	-3		iron ion binding				AT4G10500		2-oxoglutarate (2OG) and Fe(II)-dependent oxygenase superfamily protein		LOC_Os04g49210.1
GRMZM2G045473	-3.4	-3.5	-2.55917	-2.7		hypothetical protein LOC100194162				AT2G32830	PHT1;5,PHT5	phosphate transporter 1;5		LOC_Os04g10690.1
GRMZM2G017894	-2.4	-3.5	-3.37877	-2.6		transferase activity, transferring glycosyl groups				AT5G47780	GAUT4	galacturonosyltransferase 4		LOC_Os07g48370.1
GRMZM2G371793	-5.4	-3.5	-2.20475	-2.4		acid phosphatase activity				AT4G29260		HAD superfamily, subfamily IIIB acid phosphatase		LOC_Os07g27580.1
GRMZM2G166976	-4.4	-3.5	-3.60785	-2.2		transmembrane transport				AT1G63010		Major Facilitator Superfamily with SPX (SYG1/Pho81/XPR1) domain-containing protein		LOC_Os02g45520.1
GRMZM5G850455		-3.5	-2.40453	2.9		hypothetical protein LOC100194231				AT2G44290		Bifunctional inhibitor/lipid-transfer protein/seed storage 2S albumin superfamily protein		LOC_Os03g07100.1
GRMZM2G167549	-3.6	-3.5	-1.60261			monooxygenase activity				AT3G48310	CYP71A22	cytochrome P450, family 71, subfamily A, polypeptide 22		LOC_Os08g01480.1
GRMZM2G177104	-1.9	-3.5	-1.67754			oxidoreductase activity				AT4G21200	ATGA2OX8,GA2OX8	gibberellin 2-oxidase 8		LOC_Os07g01340.1
GRMZM5G824920	-2	-3.5	-1.99374			glucan endo-1,3-beta-glucosidase 3				AT2G01630		O-Glycosyl hydrolases family 17 protein		LOC_Os03g12140.1
GRMZM2G125850	-2.1	-3.5	-2.03853			LOC100279907
GRMZM2G044107	-1.4	-3.5	-2.20159			nucleic acid binding				AT1G78060		Glycosyl hydrolase family protein		LOC_Os11g19210.1
GRMZM2G389944	-3	-3.5	-2.35407			hypothetical protein LOC100216716				AT2G36800	DOGT1,UGT73C5	don-glucosyltransferase 1		LOC_Os10g09990.1
GRMZM2G107065	-2.3	-3.5	-3.05398			hypothetical protein LOC100277591				AT5G01790				LOC_Os01g07240.1
GRMZM2G116167	-1.6	-3.5	-3.18909			lipid transport				AT1G62790		Bifunctional inhibitor/lipid-transfer protein/seed storage 2S albumin superfamily protein		LOC_Os06g49770.1
GRMZM2G113098	-2.5	-3.5	-3.29882			transcription factor activity		C2C2-GATA		AT2G45050	GATA2	GATA transcription factor 2		LOC_Os10g40810.1
GRMZM2G035790	-4.3	-3.5	-3.99004			transporter activity				AT1G52190		Major facilitator superfamily protein		LOC_Os01g55610.1
GRMZM5G886185		-3.5	-3.99453			LOC100284708				AT5G57530	AtXTH12,XTH12	xyloglucan endotransglucosylase/hydrolase 12		LOC_Os02g17880.1
GRMZM2G347717	-2.5	-3.5	-4.5398			catalytic activity				AT3G53520	ATUXS1,UXS1	UDP-glucuronic acid decarboxylase 1		LOC_Os03g17230.1
GRMZM2G172081	-4.9	-3.5	-4.87538			protein kinase activity				AT2G18470	PERK4	roline-rich extensin-like receptor kinase 4		LOC_Os10g01560.1
GRMZM2G331566	-1.7	-3.5	-6.09201			catalytic activity				AT4G02290	AtGH9B13,GH9B13	glycosyl hydrolase 9B13		LOC_Os01g21070.1
GRMZM2G134178	-1.6	-3.5	-6.34389			lipid metabolic process				AT1G33811		GDSL-like Lipase/Acylhydrolase superfamily protein		LOC_Os12g17570.1
GRMZM2G078806	-2.6	-3.5				Hypothetical protein LOC100274637				AT1G36070		Transducin/WD40 repeat-like superfamily protein		LOC_Os03g26870.1
GRMZM2G145589	-2.8	-3.5				hypothetical protein LOC100191892				AT4G10520		Subtilase family protein		LOC_Os04g03100.1
GRMZM2G020468		-3.5				Putative uncharacterized protein
GRMZM2G391795		-3.5				metabolic process				AT5G06570		alpha/beta-Hydrolases superfamily protein		LOC_Os07g06850.1
GRMZM2G141762		-3.5				lipid metabolic process				AT4G18970		GDSL-like Lipase/Acylhydrolase superfamily protein		LOC_Os05g44200.1
GRMZM2G455642		-3.5				LOC100216867				AT1G70710	ATGH9B1,CEL1,GH9B1	glycosyl hydrolase 9B1		LOC_Os06g14540.1
GRMZM2G168371		-3.5				hypothetical protein LOC100276429				AT1G07090	LSH6	Protein of unknown function (DUF640)		LOC_Os02g56610.1
GRMZM2G073244	-3.6	-3.4	-2.80299	-4.2		metabolic process				AT4G15480	UGT84A1	UDP-Glycosyltransferase superfamily protein		LOC_Os01g49230.1
GRMZM2G330945	-2.4	-3.4	-2.79352	-3.2		hypothetical protein LOC100193895				AT5G42900	COR27	cold regulated gene 27		LOC_Os03g08580.1
GRMZM2G164131	-2.9	-3.4	-3.21387	-3		HPP				AT5G62720		Integral membrane HPP family protein		LOC_Os03g48030.1
GRMZM2G130149	-3.2	-3.4	-2.81054	-2.9		LOC100194394		MYB		AT5G59780	ATMYB59,ATMYB59-1,ATMYB59-2,ATMYB59-3,MYB59	myb domain protein 59		LOC_Os12g37970.1
GRMZM2G116614	-2.3	-3.4		-2.9		TSA: Zea mays contig07054, mRNA sequence		Tify		AT1G19180	JAZ1,TIFY10A	jasmonate-zim-domain protein 1		LOC_Os09g26780.1
GRMZM2G051256	-2.6	-3.4	-2.87425	-2.6		R2R3 Myb transcription factor MYB-IF35		MYB		AT2G47460	ATMYB12,MYB12,PFG1	myb domain protein 12		LOC_Os01g19970.1
GRMZM2G348890	-2	-3.4	-3.48844	-2.3		hypothetical protein LOC100275398				AT3G27880		Protein of unknown function (DUF1645)		LOC_Os05g49350.1
GRMZM2G060886	-1.2	-3.4		-2.3		metabolic process				AT1G48600	AtPMEAMT,PMEAMT	S-adenosyl-L-methionine-dependent methyltransferases superfamily protein		LOC_Os01g50030.1
GRMZM2G351318	-1.7	-3.4	-2.53668	-1.9		hypothetical protein LOC100276169				AT3G45210		Protein of unknown function, DUF584		LOC_Os04g45834.1
GRMZM2G063896		-3.4	-1.7458	1.7		histone H4				AT3G53730		Histone superfamily protein		LOC_Os03g02780.1
GRMZM2G104610		-3.4	-2.77297	2.2		proline-rich protein				AT4G38770	ATPRP4,PRP4	proline-rich protein 4		LOC_Os03g14130.1
GRMZM2G032807	-1.9	-3.4	-1.4577			heavy metal-associated domain containing protein				AT5G48290		Heavy metal transport/detoxification superfamily protein		LOC_Os09g09930.1
GRMZM2G429842	-1.6	-3.4	-1.9106			serine-type endopeptidase activity				AT2G05920		Subtilase family protein		LOC_Os09g26920.1
GRMZM2G017110	-2	-3.4	-1.91951			glutamate decarboxylase activity				AT5G17330	GAD,GAD1	glutamate decarboxylase		LOC_Os08g36320.3
GRMZM2G479684		-3.4	-2.45415			histone H4				AT5G59970		Histone superfamily protein		LOC_Os09g38020.1
GRMZM2G054013	-2.9	-3.4	-2.50047			catalytic activity				AT1G65060	4CL3	4-coumarate:CoA ligase 3		LOC_Os02g46970.1
GRMZM2G065021	-2.3	-3.4	-2.89109			receptor-like protein kinase				AT5G66330		Leucine-rich repeat (LRR) family protein		LOC_Os02g43250.1
GRMZM2G091313	-1.7	-3.4	-5.27121			hypothetical protein LOC100275905								LOC_Os04g28805.1
GRMZM2G156307	-1.1	-3.4				LOC100284766				AT5G23100		Protein of unknown function, DUF617		LOC_Os02g47980.1
GRMZM2G323422	-1.6	-3.4				TSA: Zea mays contig39451, mRNA sequence								LOC_Os06g11760.1
GRMZM2G435475	-2.2	-3.4				hypothetical protein LOC100275252				AT1G29160		Dof-type zinc finger DNA-binding family protein		LOC_Os01g55340.1
GRMZM2G172758	-2.9	-3.4				LOC100274862				AT1G04030				LOC_Os03g04550.1
GRMZM2G334639	-3.5	-3.4								AT5G26230				LOC_Os08g36970.1
GRMZM2G033544		-3.4				rRNA modification				AT3G23510		Cyclopropane-fatty-acyl-phospholipid synthase		LOC_Os07g29220.1
GRMZM2G149178		-3.4				histone H4				AT5G59970		Histone superfamily protein		LOC_Os01g61920.1
GRMZM2G066345		-3.4				nucleotide binding				AT4G24670	TAR2	tryptophan aminotransferase related 2		LOC_Os01g07500.1
GRMZM2G438253	-3.6	-3.3	-1.96189	-3.5		Clone 496194 mRNA sequence				AT3G48880		RNI-like superfamily protein		LOC_Os03g43770.1
GRMZM2G417835	-4.2	-3.3		-3		alpha1-adrenergic receptor activity				AT3G56710	SIB1	sigma factor binding protein 1		LOC_Os01g59410.1
GRMZM2G002555	-2.1	-3.3	-3.06973	-2.9		protein kinase/ transmembrane receptor protein serine/threonine kinase				AT4G32300	SD2-5	S-domain-2 5		LOC_Os01g02310.1
GRMZM2G053298	-3.2	-3.3	-3.84176	-2.8		Transcribed locus				AT1G76350		Plant regulator RWP-RK family protein		LOC_Os09g37710.1
GRMZM2G010356		-3.3		-2.7		terpene synthase 7				AT1G70080		Terpenoid cyclases/Protein prenyltransferases superfamily protein		LOC_Os03g24640.1
GRMZM2G476685	-3.4	-3.3	-2.0963	-2.2		cyclin delta-2				AT1G70210	ATCYCD1;1,CYCD1;1	CYCLIN D1;1		LOC_Os08g32540.1
GRMZM2G050412	-3.8	-3.3	-3.37218	-2.2		hypothetical protein LOC100274518				AT1G19715		Mannose-binding lectin superfamily protein		LOC_Os12g14440.1
GRMZM2G368047	-1.5	-3.3		-2		protein binding				AT4G35070		SBP (S-ribonuclease binding protein) family protein		LOC_Os04g32980.1
GRMZM2G301885	-2.9	-3.3	-2.26001	-1.9		transporter activity				AT3G18830	ATPLT5,ATPMT5,PMT5	polyol/monosaccharide transporter 5		LOC_Os03g10090.1
GRMZM2G109566	-2	-3.3	-1.26902			protein serine/threonine kinase activity				AT1G20650		Protein kinase superfamily protein		LOC_Os03g03880.1
GRMZM2G421279		-3.3	-1.95717			histone H4				AT3G53730		Histone superfamily protein		LOC_Os09g26340.1
GRMZM2G101058	-1.8	-3.3	-2.05901			GATA transcription factor 9		C2C2-GATA		AT3G60530	GATA4	GATA transcription factor 4		LOC_Os10g40810.1
GRMZM2G012224	-1.2	-3.3	-2.30556			hypothetical protein LOC100277106				AT3G08030		Protein of unknown function, DUF642		LOC_Os03g59300.1
GRMZM2G357371		-3.3	-2.47602							AT3G57030		Calcium-dependent phosphotriesterase superfamily protein		LOC_Os09g20810.1
GRMZM2G117410	-2.5	-3.3	-2.48596			Putative uncharacterized protein				AT2G32760				LOC_Os05g41160.1
GRMZM2G152328	-1.7	-3.3	-2.92943			LOC100284092				AT3G12110	ACT11	actin-11		LOC_Os03g50885.1
GRMZM2G178136		-3.3	-2.93928							AT5G45480		Protein of unknown function (DUF594)		LOC_Os07g01520.1
AC149828.2_FG004	-4	-3.3	-2.94783							AT1G72510.1		Protein of unknown function (DUF1677)		LOC_Os03g08250.1
GRMZM2G373607	-4.8	-3.3	-3.24007			serine-type carboxypeptidase activity				AT5G23210	SCPL34	serine carboxypeptidase-like 34		LOC_Os10g39560.1
GRMZM2G062718	-1.7	-3.3	-3.84125			hypothetical protein LOC100272813				AT1G25450	CER60,KCS5	3-ketoacyl-CoA synthase 5		LOC_Os01g34560.1
GRMZM2G012904	-1.9	-3.3	-4.57934			hypothetical protein LOC100272483				AT4G32460		Protein of unknown function, DUF642		LOC_Os02g11040.1
GRMZM2G079440	2.9	-3.3				dehydrin1				AT5G66400	ATDI8,RAB18	Dehydrin family protein		LOC_Os11g26780.1
GRMZM2G172537	-2.7	-3.3				LOC100284235				AT1G32860		Glycosyl hydrolase superfamily protein		LOC_Os03g14210.1
GRMZM2G157456	-4	-3.3				electron carrier activity				AT5G01420		Glutaredoxin family protein		LOC_Os03g44650.1
GRMZM2G414423		-3.3				TSA: Zea mays contig41383, mRNA sequence								LOC_Os07g47140.1
GRMZM2G427418		-3.3				Transcribed locus, moderately similar to NP_001168327.1 hypothetical protein LOC100382095 [Zea mays]				AT5G57580		Calmodulin-binding protein		LOC_Os03g18960.1
GRMZM2G448458		-3.3				nucleosome				AT5G02560	HTA12	histone H2A 12		LOC_Os05g02300.1
GRMZM2G057514	-1.9	-3.2		-7.5		monooxygenase activity				AT4G39490	CYP96A10	cytochrome P450, family 96, subfamily A, polypeptide 10		LOC_Os03g04660.1
GRMZM2G026532	-2.1	-3.2		-5		hypothetical protein LOC100272916				AT5G36110	CYP716A1	cytochrome P450, family 716, subfamily A, polypeptide 1		LOC_Os07g33620.1
GRMZM2G102079	-3.8	-3.2		-4.3		monooxygenase activity				AT5G07990	CYP75B1,D501,TT7	Cytochrome P450 superfamily protein		LOC_Os03g44740.1
GRMZM2G125482	-2.4	-3.2	-4.20084	-3.9		flavonoid 3-monooxygenase				AT5G07990	CYP75B1,D501,TT7	Cytochrome P450 superfamily protein		LOC_Os09g26960.1
GRMZM2G068179	-4.2	-3.2	-3.35553	-3.7		methyltransferase activity				AT5G42760		Leucine carboxyl methyltransferase		LOC_Os03g56370.1
GRMZM2G016241	-2.3	-3.2	-2.38098	-3		glutathione transferase activity				AT1G10370	ATGSTU17,ERD9,GST30,GST30B	Glutathione S-transferase family protein		LOC_Os10g25590.1
GRMZM2G135713		-3.2	-2.80414	-2.8		ubiquitin ligase complex				AT2G35930	PUB23	plant U-box 23		LOC_Os01g64570.1
GRMZM2G133966	-3.1	-3.2	-2.97077	-2.6		catalytic activity				AT1G78580	ATTPS1,TPS1	trehalose-6-phosphate synthase		LOC_Os05g44210.1
GRMZM2G128971	-2.9	-3.2	-3.13245	-2.6		fatty acid desaturase7				AT5G05580	FAD8	fatty acid desaturase 8		LOC_Os03g18070.1
AC149829.2_FG004	-2.6	-3.2		-2.2						AT3G28857.1		basic helix-loop-helix (bHLH) DNA-binding family protein		LOC_Os10g26410.1
GRMZM2G091643		-3.2		-2		catalytic activity				AT5G63380		AMP-dependent synthetase and ligase family protein		LOC_Os07g17970.1
GRMZM2G421256		-3.2		-1.9		hypothetical protein LOC100279070								LOC_Os04g49450.2
GRMZM2G052357	-1.4	-3.2	-1.54659			NAD-dependent epimerase/dehydratase family protein				AT3G23820	GAE6	UDP-D-glucuronate 4-epimerase 6		LOC_Os08g41440.1
GRMZM2G072669	-2	-3.2	-1.67311							AT4G37080		Protein of unknown function, DUF547		LOC_Os09g28850.1
GRMZM2G081017		-3.2	-1.82168			DNA binding				AT2G04780	FLA7	FASCICLIN-like arabinoogalactan 7		LOC_Os09g30486.1
GRMZM2G311898		-3.2	-2.02389			Grx_I1 - glutaredoxin subgroup III				AT1G28480	GRX480,roxy19	Thioredoxin superfamily protein		LOC_Os01g47760.1
GRMZM2G060943	-2.1	-3.2	-2.17829			hypothetical protein LOC100278658				AT3G29180		Protein of unknown function (DUF1336)		LOC_Os12g38850.1
GRMZM2G042154		-3.2	-2.40956			transporter activity				AT1G68570		Major facilitator superfamily protein		LOC_Os05g33960.1
GRMZM2G374302	-1.6	-3.2	-2.5086			LOC100193626				AT2G16500	ADC1,ARGDC,ARGDC1,SPE1	arginine decarboxylase 1		LOC_Os04g01690.1
GRMZM2G109814		-3.2	-2.5277			hsp20/alpha crystallin family protein								LOC_Os10g07210.1
GRMZM2G119499	-1.1	-3.2	-2.75777			product:glutathione S-transferase GST 11				AT3G03190	ATGSTF11,ATGSTF6,GSTF11	glutathione S-transferase F11		LOC_Os03g04220.1
GRMZM2G179279	-2	-3.2	-2.99043			protein kinase activity				AT1G54820		Protein kinase superfamily protein		LOC_Os05g33080.1
GRMZM2G178106	-1.4	-3.2	-3.3817			hydrolase activity, hydrolyzing O-glycosyl compounds				AT4G36360	BGAL3	beta-galactosidase 3		LOC_Os03g06940.1
GRMZM2G166711		-3.2	-4.61465			metal ion transport				AT2G28660		Chloroplast-targeted copper chaperone protein		LOC_Os08g31340.1
GRMZM2G335476		-3.2	-6.84232							AT5G45480		Protein of unknown function (DUF594)		LOC_Os09g38660.1
GRMZM2G097313	-1.3	-3.2				hypothetical protein LOC100272330				AT2G45340		Leucine-rich repeat protein kinase family protein		LOC_Os06g04370.1
GRMZM2G092432	-2.8	-3.2				ACR8				AT1G12420	ACR8	ACT domain repeat 8		LOC_Os03g14370.2
GRMZM2G401331		-3.2				Hypothetical protein LOC100277151
GRMZM5G889644		-3.2				hypothetical protein LOC100278155				AT1G04030				LOC_Os04g43230.1
GRMZM2G318849		-3.2				hypothetical protein LOC100278719				AT2G07170		ARM repeat superfamily protein		LOC_Os09g38710.1
GRMZM2G067298		-3.2				LOC100274729				AT5G66230		Chalcone-flavanone isomerase family protein		LOC_Os10g42660.1
GRMZM2G105335		-3.2				ATP binding		GRF		AT3G13960	AtGRF5,GRF5	growth-regulating factor 5		LOC_Os02g53690.1
GRMZM5G842695		-3.2				drug transmembrane transport				AT3G21690		MATE efflux family protein		LOC_Os03g37490.1
GRMZM2G131243		-3.2				catalytic activity				AT4G27250		NAD(P)-binding Rossmann-fold superfamily protein		LOC_Os07g40986.1
GRMZM2G152120	-3	-3.1	-2.87681	-5.2		protein kinase activity				AT4G21390	B120	S-locus lectin protein kinase family protein		LOC_Os04g53994.1
GRMZM2G414317	-3.8	-3.1	-2.39731	-4.7		copper ion binding				AT1G72230		Cupredoxin superfamily protein		LOC_Os08g37660.1
GRMZM2G472827	-4	-3.1	-5.28753	-4.4		0				AT5G42950		GYF domain-containing protein		LOC_Os07g04530.1
GRMZM2G150724	-2.6	-3.1	-3.80734	-2.8		LOC100191557				AT3G07880	SCN1	Immunoglobulin E-set superfamily protein		LOC_Os01g68540.1
GRMZM2G001304	-3	-3.1	-3.5464	-2.7		catalytic activity				AT1G78580	ATTPS1,TPS1	trehalose-6-phosphate synthase		LOC_Os05g44210.1
GRMZM5G872256	-3.5	-3.1	-1.41041	-2.4		product:galactinol synthase 3				AT2G47180	AtGolS1,GolS1	galactinol synthase 1		LOC_Os03g20120.1
GRMZM5G886177	-3	-3.1	-2.87419	-2.4		pathogen-related protein				AT1G78780		pathogenesis-related family protein		LOC_Os01g53090.1
GRMZM2G165919	-3.2	-3.1	-2.71848	-2.3		galactinol synthase 1				AT2G47180	AtGolS1,GolS1	galactinol synthase 1		LOC_Os03g20120.1
GRMZM2G136081	-2.6	-3.1	-2.57229	-2.1		LOC100284467				AT2G38820		Protein of unknown function (DUF506)		LOC_Os03g06680.1
GRMZM2G179696	-2.6	-3.1	-2.88835	-2.1		DNA binding				AT1G60590		Pectin lyase-like superfamily protein		LOC_Os01g44970.1
GRMZM2G074158	-3.4	-3.1	-3.97473	-1.9		product:starch phosphorylase 1 precursor				AT3G29320		Glycosyl transferase, family 35		LOC_Os03g55090.1
GRMZM2G114276		-3.1		2.1		protein kinase activity				AT4G36180		Leucine-rich receptor-like protein kinase family protein		LOC_Os04g48760.1
GRMZM2G114552		-3.1	2.532			serine-type endopeptidase inhibitor activity								LOC_Os01g03680.1
GRMZM2G101916		-3.1	-1.45429			hypothetical protein LOC100384589				AT3G20570	AtENODL9,ENODL9	early nodulin-like protein 9		LOC_Os06g46740.1
GRMZM2G055844	-1.8	-3.1	-2.19504			LOC100191370				AT5G67200		Leucine-rich repeat protein kinase family protein		LOC_Os04g55620.1
GRMZM2G165488	-3.2	-3.1	-2.36978			transcription factor activity		CCAAT		AT5G06510	NF-YA10	nuclear factor Y, subunit A10		LOC_Os03g44540.1
GRMZM2G060255	-1.3	-3.1	-2.39377			LOC100284725				AT1G44760		Adenine nucleotide alpha hydrolases-like superfamily protein		LOC_Os01g65440.1
GRMZM2G141386		-3.1	-2.77481			nucleic acid binding				AT3G54770		RNA-binding (RRM/RBD/RNP motifs) family protein		LOC_Os03g17760.1
GRMZM2G043943	-1.6	-3.1	-2.80959			cell wall				AT5G19730		Pectin lyase-like superfamily protein		LOC_Os05g44600.1
GRMZM2G042502	-1.5	-3.1	-2.91054			LOC100280449				AT1G76550		Phosphofructokinase family protein		LOC_Os02g48360.1
GRMZM2G040230		-3.1	-2.96267			LOC100281655				AT1G69420		DHHC-type zinc finger family protein		LOC_Os03g11110.1
GRMZM2G001241	-2.2	-3.1	-3.43241			LOC100273386				AT3G04290	ATLTL1,LTL1	Li-tolerant lipase 1		LOC_Os04g42860.1
GRMZM2G049378	-2.7	-3.1	-3.55106			SANT/MYB protein				AT1G75250	ATRL6,RL6,RSM3	RAD-like 6		LOC_Os01g47370.1
GRMZM2G136665	-2.3	-3.1	-3.69804			nucleotide binding				AT2G02480	STI	AAA-type ATPase family protein		LOC_Os12g10670.1
GRMZM2G034572	-1.4	-3.1	-3.91163			hypothetical protein LOC100274894				AT4G20940		Leucine-rich receptor-like protein kinase family protein		LOC_Os07g05190.1
GRMZM2G049781	-1.5	-3.1	-5.41607			heavy metal-associated domain containing protein				AT1G23000		Heavy metal transport/detoxification superfamily protein		LOC_Os01g03490.1
GRMZM2G039520	-1.6	-3.1	-7.23783							AT4G11000		Ankyrin repeat family protein		LOC_Os11g45580.1
GRMZM2G121495	-1.5	-3.1				hydrolase activity, hydrolyzing O-glycosyl compounds				AT3G13750	BGAL1	beta galactosidase 1		LOC_Os01g65460.1
GRMZM2G066528	-1.8	-3.1				DNA binding		HMG		AT1G20696	HMGB3,NFD03,NFD3	high mobility group B3		LOC_Os09g37910.1
GRMZM2G161313	-2	-3.1												LOC_Os06g02930.1
GRMZM2G107096	-2.1	-3.1								AT5G01750		Protein of unknown function (DUF567)		LOC_Os07g12730.1
GRMZM2G316789	-2.3	-3.1				hypothetical protein LOC100277126				AT4G13180		NAD(P)-binding Rossmann-fold superfamily protein		LOC_Os06g08600.1
GRMZM2G455306	-2.3	-3.1				catalytic activity				AT4G30440	GAE1	UDP-D-glucuronate 4-epimerase 1		LOC_Os02g54890.1
GRMZM2G470075	-2.4	-3.1				drug transmembrane transport				AT3G21690		MATE efflux family protein		LOC_Os03g37640.1
AC210168.4_FG003	-3.3	-3.1								AT2G28790.1		Pathogenesis-related thaumatin superfamily protein		LOC_Os12g38150.1
GRMZM2G031615		-3.1				hypothetical protein LOC100273821								LOC_Os11g11410.1
GRMZM2G101634		-3.1				hypothetical protein LOC100273639				AT5G26230				LOC_Os05g02980.1
GRMZM2G400718		-3.1				LOC100278717				AT4G28310				LOC_Os06g02530.1
GRMZM2G418258		-3.1				Histone H3.2				AT1G09200		Histone superfamily protein		LOC_Os04g34240.1
GRMZM2G152969		-3.1				transferase activity, transferring acyl groups other than amino-acyl groups				AT3G62160		HXXXD-type acyl-transferase family protein		LOC_Os04g11810.1
GRMZM2G048430		-3.1				LOC100283824				AT1G62770		Plant invertase/pectin methylesterase inhibitor superfamily protein		LOC_Os06g49760.1
GRMZM2G138131		-3.1				ubiquitin-protein ligase/ zinc ion binding protein				AT2G23530		Zinc-finger domain of monoamine-oxidase A repressor R1		LOC_Os11g36030.1
GRMZM2G428027	-4.9	-3	-5.77464	-6.5		DNA binding				AT1G77760	GNR1,NIA1,NR1	nitrate reductase 1		LOC_Os02g53130.1
GRMZM2G005040	-3.7	-3	-3.21561	-4.3		potassium ion transport				AT2G35060	KUP11	K+ uptake permease 11		LOC_Os04g52390.1
GRMZM2G143400	-2.9	-3	-6.3704	-3.6		sugar:hydrogen symporter activity				AT5G19700		MATE efflux family protein		LOC_Os09g35600.1
GRMZM2G178046		-3		-3.1						AT3G50160		Plant protein of unknown function (DUF247)		LOC_Os08g02820.1
GRMZM2G058173		-3		-3.1		undecaprenyl pyrophosphate synthetase				AT5G58770		Undecaprenyl pyrophosphate synthetase family protein		LOC_Os01g63830.1
GRMZM2G331253	-2.9	-3	-2.51127	-3		zinc ion binding				AT3G09760		RING/U-box superfamily protein		LOC_Os06g23274.1
GRMZM2G045565	-3.1	-3	-1.74767	-2.9						AT3G08890		Protein of unknown function, DUF538		LOC_Os01g38500.1
GRMZM2G029407	-2.1	-3	-1.21979	-2.8		hypothetical protein LOC100383609				AT4G31250		Leucine-rich repeat protein kinase family protein		LOC_Os06g45240.1
GRMZM2G135586	-3.5	-3	-2.89115	-2.8		catalytic activity				AT4G21470	ATFMN/FHY,FMN/FHY	riboflavin kinase/FMN hydrolase		LOC_Os01g55310.1
GRMZM2G023711	-3.1	-3	-3.1128	-2.8		cell redox homeostasis				AT5G06690	WCRKC1	WCRKC thioredoxin 1		LOC_Os02g53400.1
GRMZM2G007928	-3.8	-3		-2.6		Bowman-Birk type trypsin inhibitor								LOC_Os03g60840.1
GRMZM2G055135	-2.8	-3	-3.11851	-2.4		LOC100285579				AT1G32540	LOL1	lsd one like 1		LOC_Os08g06280.4
GRMZM2G174739	-2.4	-3		-2.4		inositol or phosphatidylinositol phosphatase activity				AT5G65090	BST1,DER4,MRH3	DNAse I-like superfamily protein		LOC_Os05g41000.1
GRMZM2G149739	-2.3	-3		-2.1		homoiothermy								LOC_Os11g35080.1
GRMZM2G091456	-1.5	-3	-2.90513	-1.8		hypothetical protein LOC100274333				AT1G58440	SQE1,XF1	FAD/NAD(P)-binding oxidoreductase family protein		LOC_Os03g12910.1
GRMZM2G071339		-3		2.8		cell wall				AT5G19730		Pectin lyase-like superfamily protein		LOC_Os05g44600.1
GRMZM2G046024	-2.6	-3	-1.33689			ATPase, coupled to transmembrane movement of substances				AT1G71960	ABCG25,ATABCG25	ATP-binding casette family G25		LOC_Os11g07600.1
GRMZM2G106462	-3.1	-3	-1.35416			catalytic activity				AT4G15920		Nodulin MtN3 family protein		LOC_Os03g22200.1
GRMZM2G177384	-2.3	-3	-1.4154			hypothetical protein LOC100273258				AT1G11680	CYP51,CYP51A2,CYP51G1,EMB1738	CYTOCHROME P450 51G1		LOC_Os02g21810.1
GRMZM5G839794	-3.2	-3	-1.62234			acid phosphatase activity				AT4G25150		HAD superfamily, subfamily IIIB acid phosphatase		LOC_Os06g04790.1
GRMZM2G702036	-1.2	-3	-1.84779			hypothetical protein LOC100278334				AT2G30370	CHAL,EPFL6	allergen-related		LOC_Os01g60900.1
GRMZM2G318213	-2.1	-3	-1.86572			LOC100281624				AT5G11930		Thioredoxin superfamily protein		LOC_Os05g10930.1
GRMZM2G103281	-1.5	-3	-1.92618			catalytic activity				AT2G38670	PECT1	phosphorylethanolamine cytidylyltransferase 1		LOC_Os12g02820.1
GRMZM2G053170	-2.3	-3	-2.22498
GRMZM2G365875		-3	-2.28268							AT4G19090		Protein of unknown function (DUF594)		LOC_Os07g02480.1
GRMZM2G102347	-1.8	-3	-2.46278			LOC100282291				AT5G42560		Abscisic acid-responsive (TB2/DP1, HVA22) family protein		LOC_Os03g14610.1
GRMZM2G302664	-1.5	-3	-2.66321			hypothetical protein LOC100272899				AT1G80520		Sterile alpha motif (SAM) domain-containing protein		LOC_Os06g08100.1
GRMZM2G171423	-3	-3	-2.67024			LOC100216711				AT5G20150	ATSPX1,SPX1	SPX domain gene 1		LOC_Os06g40120.1
GRMZM2G023840		-3	-2.72377			peroxidase activity				AT5G66390		Peroxidase superfamily protein		LOC_Os01g36240.1
GRMZM2G047995	-3.1	-3	-2.77174			LOC100280204				AT5G18640		alpha/beta-Hydrolases superfamily protein		LOC_Os07g47250.2
GRMZM2G392863		-3	-2.79151			flower-specific gamma-thionin				AT2G02100	LCR69,PDF2.2	low-molecular-weight cysteine-rich 69		LOC_Os03g03810.1
GRMZM2G339379	-2.1	-3	-2.85269			Clone 394823 mRNA sequence				AT3G48430	REF6	relative of early flowering 6		LOC_Os01g67970.1
GRMZM2G064744	-1.4	-3	-3.12732			hypothetical protein LOC100383951		MYB		AT5G26660	ATMYB86,MYB86	myb domain protein 86		LOC_Os01g36460.1
GRMZM2G099981	-1.3	-3	-3.20652			hypothetical protein LOC100273528				AT1G03440		Leucine-rich repeat (LRR) family protein		LOC_Os05g33690.1
GRMZM2G114841	-2.7	-3	-3.3035			Full-length cDNA clone ZM_BFb0370H23				AT1G27920	MAP65-8	microtubule-associated protein 65-8		LOC_Os08g41890.1
GRMZM2G100911	-2.2	-3	-3.87725			hypothetical protein LOC100279756				AT5G51560		Leucine-rich repeat protein kinase family protein		LOC_Os01g39600.1
GRMZM5G840538	-4.6	-3	-4.46963			Rho guanyl-nucleotide exchange factor activity				AT4G13240	ATROPGEF9,ROPGEF9	RHO guanyl-nucleotide exchange factor 9		LOC_Os01g55520.1
GRMZM2G397927	-1.9	-3	-4.61719			Hypothetical protein LOC100277450				AT5G57123				LOC_Os06g44980.1
GRMZM2G037431	-2.5	-3	-4.74023			polygalacturonase				AT1G10640		Pectin lyase-like superfamily protein		LOC_Os01g44970.1
GRMZM2G046201	-2	-3	-5.00955			protein kinase activity				AT2G36570		Leucine-rich repeat protein kinase family protein		LOC_Os12g05120.1
GRMZM2G409312	-1.6	-3	-5.29014			LOC100283095				AT1G68530	CER6,CUT1,G2,KCS6,POP1	3-ketoacyl-CoA synthase 6		LOC_Os01g34560.1
GRMZM2G128504	-1.2	-3				hypothetical protein LOC100193288				AT3G02100		UDP-Glycosyltransferase superfamily protein		LOC_Os10g18510.1
GRMZM2G108600	-1.6	-3				hypothetical protein LOC100216582				AT5G03760	ATCSLA09,ATCSLA9,CSLA09,CSLA9,RAT4	Nucleotide-diphospho-sugar transferases superfamily protein		LOC_Os08g33740.1
GRMZM2G035994	-1.9	-3				hypothetical protein LOC100383200				AT4G29720	ATPAO5,PAO5	polyamine oxidase 5		LOC_Os01g51320.1
GRMZM5G846057	-2	-3				hypothetical protein LOC100272581				AT1G78080	RAP2.4	related to AP2 4		LOC_Os05g49700.1
GRMZM2G030831	-3.6	-3				hypothetical protein LOC100193472				AT1G64940	CYP89A6	cytochrome P450, family 87, subfamily A, polypeptide 6		LOC_Os08g05620.1
GRMZM2G099097	-4.6	-3				iron ion binding				AT1G02205	CER1	Fatty acid hydroxylase superfamily		LOC_Os02g56920.1
GRMZM2G057637		-3				hypothetical protein LOC100275025								LOC_Os08g23170.1
GRMZM2G148057		-3				protein Kinase interacting protein				AT3G17680		Kinase interacting (KIP1-like) family protein		LOC_Os03g01980.1
GRMZM2G335111		-3				glucan endo-1,3-beta-glucosidase, acidic isoform				AT4G26830		O-Glycosyl hydrolases family 17 protein		LOC_Os09g36280.1
GRMZM2G126765		-3				protein tyrosine phosphatase activity				AT1G05000		Phosphotyrosine protein phosphatases superfamily protein		LOC_Os02g53160.1
GRMZM2G156729	-3.3	-2.9	-2.33909	-5.5		glycerol-3-phosphate acyltransferase 1				AT4G01950	ATGPAT3,GPAT3	glycerol-3-phosphate acyltransferase 3		LOC_Os03g61720.1
GRMZM2G136857	-4.5	-2.9		-3.6		methyltransferase activity				AT5G38020		S-adenosyl-L-methionine-dependent methyltransferases superfamily protein		LOC_Os05g01140.1
GRMZM2G051753	-2.2	-2.9	-4.51535	-3.5		inorganic anion exchanger activity				AT1G15460	ATBOR4,BOR4	HCO3- transporter family		LOC_Os01g08020.1
GRMZM2G004653	-2.1	-2.9	-4.69359	-3.2		POT family protein				AT1G22540		Major facilitator superfamily protein		LOC_Os01g65150.1
GRMZM2G130375	-2.4	-2.9	-2.34789	-2.8		hypothetical protein LOC100272556				AT3G13750	BGAL1	beta galactosidase 1		LOC_Os01g39830.1
GRMZM2G026927	-2.9	-2.9	-3.51915	-2.8		hypothetical protein LOC100216587		OFP		AT1G06920	ATOFP4,OFP4	ovate family protein 4		LOC_Os01g60810.1
GRMZM2G074097	-2.8	-2.9	-1.81621	-2.7		thiamine biosynthetic enzyme				AT5G54770	THI1,THI4,TZ	thiazole biosynthetic enzyme, chloroplast (ARA6) (THI1) (THI4)		LOC_Os07g34570.1
GRMZM2G167220	-2.7	-2.9	-2.67484	-2.7		cytokinin oxidase 3				AT2G41510	ATCKX1,CKX1	cytokinin oxidase/dehydrogenase 1		LOC_Os01g71310.1
GRMZM2G053303	-2.6	-2.9	-3.13842	-2.7		protein binding				AT5G40250		RING/U-box superfamily protein		LOC_Os02g50930.1
GRMZM2G054267	-3.5	-2.9	-2.64264	-2.6		hypothetical protein LOC100276382				AT4G14100		transferases, transferring glycosyl groups		LOC_Os07g09140.1
AC233850.1_FG003	-2.3	-2.9	-3.30024	-2.6						AT5G46940.1		Plant invertase/pectin methylesterase inhibitor superfamily protein		LOC_Os02g33130.1
GRMZM2G471517	-5.5	-2.9	-3.02938	-2.5		hypothetical protein LOC100274910								LOC_Os01g03940.1
GRMZM2G161169	-2.6	-2.9		-2		taxane 10-beta-hydroxylase				AT5G36110	CYP716A1	cytochrome P450, family 716, subfamily A, polypeptide 1		LOC_Os07g33580.1
AC165171.2_FG002	2.4	-2.9		2.1						AT5G43290.1	ATWRKY49,WRKY49	WRKY DNA-binding protein 49		LOC_Os01g74140.1
GRMZM2G325693	-2.9	-2.9	5.35072			hypothetical protein LOC100277209
GRMZM2G151589	-1.5	-2.9	-1.38974			hypothetical protein LOC100381471				AT4G38660		Pathogenesis-related thaumatin superfamily protein		LOC_Os10g05600.1
GRMZM2G005419	-1.9	-2.9	-1.56372			hypothetical protein LOC100275768				AT5G67390				LOC_Os12g32360.1
GRMZM2G096247		-2.9	-1.5905			LOC100282447				AT2G47730	ATGSTF5,ATGSTF8,GST6,GSTF8	glutathione S-transferase phi 8		LOC_Os03g04250.1
GRMZM2G047002	-2.1	-2.9	-1.75169			LOC100277637				AT5G20190		Tetratricopeptide repeat (TPR)-like superfamily protein		LOC_Os03g04710.1
GRMZM2G002420		-2.9	-1.77149			TSA: Zea mays contig31002, mRNA sequence
GRMZM2G118951	-1.9	-2.9	-1.82479			LOC100273348				AT1G17620		Late embryogenesis abundant (LEA) hydroxyproline-rich glycoprotein family		LOC_Os05g11010.1
GRMZM2G100898	-1.7	-2.9	-1.8693			Transcribed locus, weakly similar to XP_002267381.1 PREDICTED: hypothetical protein [Vitis vinifera]				AT1G15910		XH/XS domain-containing protein		LOC_Os01g05470.1
GRMZM2G054713		-2.9	-1.97743			hypothetical protein LOC100191186								LOC_Os01g68570.1
GRMZM2G152025	-1.6	-2.9	-2.07797			hypothetical protein LOC100273575				AT5G63060		Sec14p-like phosphatidylinositol transfer family protein		LOC_Os02g21630.1
GRMZM2G059314	-3	-2.9	-2.23377			LOC100279403				AT2G37790		NAD(P)-linked oxidoreductase superfamily protein		LOC_Os05g38230.2
GRMZM5G847216	-1.5	-2.9	-2.46665			hypothetical protein LOC100277225				AT3G14760				LOC_Os02g21640.1
GRMZM2G120657	-2.5	-2.9	-2.50674			protein kinase activity				AT3G03770		Leucine-rich repeat protein kinase family protein		LOC_Os03g57780.1
GRMZM2G072850	-1.4	-2.9	-2.6403			nucleotide binding				AT3G28860	ABCB19,ATABCB19,ATMDR1,ATMDR11,ATPGP19,MDR1,MDR11,PGP19	ATP binding cassette subfamily B19		LOC_Os04g38570.1
GRMZM2G097349	-1.1	-2.9	-2.73913			homeobox-leucine zipper protein HAT7		HB		AT1G69780	ATHB13	Homeobox-leucine zipper protein family		LOC_Os03g07450.1
GRMZM2G106213	-2.6	-2.9	-2.88083			ADP-glucose pyrophosphorylase small subunit				AT5G48300	ADG1,APS1	ADP glucose pyrophosphorylase 1		LOC_Os09g12660.1
GRMZM2G103773	-2.2	-2.9	-3.31784			hypothetical protein LOC100193331				AT3G30180	BR6OX2,CYP85A2	brassinosteroid-6-oxidase 2		LOC_Os03g40540.1
GRMZM5G835629	-2	-2.9	-3.40331			protein kinase activity				AT3G26700		Protein kinase superfamily protein		LOC_Os05g30820.2
GRMZM2G016551		-2.9	-3.45075			integral to membrane				AT1G13580	LAG13	LAG1 longevity assurance homolog 3		LOC_Os02g37080.1
GRMZM2G056826		-2.9	-3.54395			Transcribed locus, weakly similar to NP_001057427.1 Os06g0294000 [Oryza sativa Japonica Group]				AT4G11000		Ankyrin repeat family protein		LOC_Os06g18990.1
GRMZM2G438386		-2.9	-3.59711			LOC732784				AT4G12420	SKU5	Cupredoxin superfamily protein		LOC_Os10g36390.1
GRMZM2G037574		-2.9	-3.80687			zinc finger protein 2		C2H2		AT5G57520	ATZFP2,ZFP2	zinc finger protein 2		LOC_Os09g26210.1
GRMZM2G086637	-1.3	-2.9	-3.82011			patellin-5				AT3G51670		SEC14 cytosolic factor family protein / phosphoglyceride transfer family protein		LOC_Os05g27820.1
GRMZM2G418343	-1.6	-2.9	-4.12906			nutrient reservoir activity				AT2G20870		cell wall protein precursor, putative		LOC_Os07g37850.1
AC208897.3_FG003	-1.8	-2.9	-4.31509							AT1G51405.1		myosin-related		LOC_Os03g11770.1
AC197146.3_FG001		-2.9	-6.6328							AT3G25100.1	CDC45	cell division cycle 45		LOC_Os11g03430.1
GRMZM2G422240	-1.2	-2.9								AT5G59720	HSP18.2	heat shock protein 18.2		LOC_Os01g04370.1
GRMZM2G030173	-1.3	-2.9				xyloglucan endotransglucosylase/hydrolase protein 5				AT2G06850	EXGT-A1,EXT,XTH4	xyloglucan endotransglucosylase/hydrolase 4		LOC_Os03g02610.1
GRMZM2G091490	-1.4	-2.9				DNA binding		NAC		AT2G46770	ANAC043,EMB2301,NST1	NAC (No Apical Meristem) domain transcriptional regulator superfamily protein		LOC_Os06g04090.1
GRMZM2G017868	-1.7	-2.9				hydrolase activity				AT1G79690	atnudt3,NUDT3	nudix hydrolase homolog 3		LOC_Os02g55030.1
GRMZM2G103276	-1.8	-2.9				hypothetical protein LOC100275238				AT1G11120				LOC_Os07g37820.1
GRMZM2G076049	-1.8	-2.9				hypothetical protein LOC100192969				AT1G70710	ATGH9B1,CEL1,GH9B1	glycosyl hydrolase 9B1		LOC_Os02g50040.1
GRMZM2G461279	-1.9	-2.9				biosynthetic process				AT3G57030		Calcium-dependent phosphotriesterase superfamily protein		LOC_Os09g20810.1
GRMZM5G848739	-2.3	-2.9				hypothetical protein LOC100384158
GRMZM2G005046	-2.5	-2.9				transferase activity, transferring acyl groups other than amino-acyl groups				AT5G17540		HXXXD-type acyl-transferase family protein		LOC_Os10g35950.1
GRMZM5G838285	-2.6	-2.9								AT1G78390	ATNCED9,NCED9	nine-cis-epoxycarotenoid dioxygenase 9		LOC_Os03g44380.1
GRMZM2G108514	-2.7	-2.9				hypothetical protein LOC100274380				AT2G20340		Pyridoxal phosphate (PLP)-dependent transferases superfamily protein		LOC_Os10g26110.1
GRMZM2G097030	-2.7	-2.9				UDP-glucosyltransferase				AT3G55700		UDP-Glycosyltransferase superfamily protein		LOC_Os07g13810.1
GRMZM2G109286	-3.5	-2.9				lipid metabolic process				AT1G13680		PLC-like phosphodiesterases superfamily protein		LOC_Os03g30130.1
GRMZM2G044670		-2.9				hypothetical protein LOC100272471				AT1G14630				LOC_Os02g53280.1
GRMZM2G310548		-2.9				hypothetical protein LOC100276941
GRMZM2G042754		-2.9				LOC100276892				AT5G50890		alpha/beta-Hydrolases superfamily protein		LOC_Os01g54810.1
GRMZM2G010306		-2.9				hypothetical protein LOC100191459				AT1G53140	DRP5A	Dynamin related protein 5A		LOC_Os01g54420.1
AC205008.4_FG002		-2.9								AT4G30110.1	ATHMA2,HMA2	heavy metal atpase 2		LOC_Os07g12900.1
GRMZM2G066142		-2.9				agmatine coumaroyltransferase				AT1G31490		HXXXD-type acyl-transferase family protein		LOC_Os11g42480.1
GRMZM2G162020		-2.9				homoiothermy				AT4G00820	iqd17	IQ-domain 17		LOC_Os08g02250.1
GRMZM2G416677		-2.9				hypothetical protein LOC100272391				AT1G70340		Plant protein of unknown function (DUF936)		LOC_Os01g01890.1
GRMZM2G440785		-2.9				hypothetical protein LOC100217015				AT3G09070		Protein of unknown function (DUF740)		LOC_Os01g63310.1
GRMZM2G086949		-2.9				DNA binding		ARF		AT1G19850	ARF5,IAA24,MP	Transcriptional factor B3 family protein / auxin-responsive factor AUX/IAA-related		LOC_Os04g56850.1
GRMZM2G360519		-2.9				TSA: Zea mays contig10520, mRNA sequence				AT1G47670		Transmembrane amino acid transporter family protein		LOC_Os04g47420.1
GRMZM2G337766		-2.8	-2.78161	-3.5		protein kinase activity				AT1G73080	ATPEPR1,PEPR1	PEP1 receptor 1		LOC_Os10g06760.1
GRMZM2G025832	-4.2	-2.8	-3.56106	-3.2		hypothetical protein LOC100273383				AT5G07990	CYP75B1,D501,TT7	Cytochrome P450 superfamily protein		LOC_Os10g17260.1
GRMZM2G314125	-3.7	-2.8	-3.22167	-3						AT2G41460	ARP	apurinic endonuclease-redox protein		LOC_Os04g55810.1
GRMZM2G081915	-2.3	-2.8	-2.23607	-2.9		protein kinase activity				AT4G33950	ATOST1,OST1,P44,SNRK2-6,SNRK2.6,SRK2E	Protein kinase superfamily protein		LOC_Os03g41460.1
GRMZM2G052908	-2.1	-2.8	-1.44417	-2.5		hypothetical protein LOC100272621				AT3G20810		2-oxoglutarate (2OG) and Fe(II)-dependent oxygenase superfamily protein		LOC_Os09g31380.1
GRMZM2G068904	-1.7	-2.8	-2.6497	-2		thromboxane receptor activity				AT2G28260	ATCNGC15,CNGC15	cyclic nucleotide-gated channel 15		LOC_Os02g41710.1
GRMZM5G875864	-1.1	-2.8	-1.40681	-1.9		hypothetical protein LOC100191928								LOC_Os01g02940.6
GRMZM2G124963	-2.1	-2.8	-3.43543	-1.9		biosynthetic process				AT1G72330	ALAAT2	alanine aminotransferase 2		LOC_Os07g42600.1
GRMZM2G129413		-2.8		2.5		auxin import carrier1				AT2G21050	LAX2	like AUXIN RESISTANT 2		LOC_Os10g05690.1
GRMZM2G009103		-2.8	3.3693			membrane				AT5G64700		nodulin MtN21 /EamA-like transporter family protein		LOC_Os07g34070.1
AC155376.2_FG004	-1.1	-2.8	-1.27508							AT3G25500.1	AFH1,AHF1,ATFH1,FH1	formin homology 1		LOC_Os01g67240.1
GRMZM2G176446	-1.9	-2.8	-1.42417			hypothetical protein LOC100279986				AT5G48930	HCT	hydroxycinnamoyl-CoA shikimate/quinate hydroxycinnamoyl transferase		LOC_Os08g43040.1
GRMZM2G136895	-1.1	-2.8	-1.52742			hypothetical protein LOC100279996				AT5G64570	ATBXL4,XYL4	beta-D-xylosidase 4		LOC_Os04g54810.1
GRMZM2G016923	-1.4	-2.8	-1.84011			Full-length cDNA clone ZM_BFb0338I21				AT3G61670		Protein of unknown function (DUF3133)		LOC_Os02g15820.1
GRMZM2G154578	-1.4	-2.8	-1.89209			extracellular region				AT3G07390	AIR12	auxin-responsive family protein		LOC_Os08g41290.1
GRMZM2G163724		-2.8	-1.91443			hypothetical protein LOC100383466				AT2G15300		Leucine-rich repeat protein kinase family protein		LOC_Os01g33090.1
GRMZM2G114893	-1	-2.8	-2.20662			type I hypersensitivity				AT1G62520				LOC_Os10g40584.1
GRMZM2G158232	-3.1	-2.8	-2.38546			16.9 kDa class I heat shock protein 1				AT1G53540		HSP20-like chaperones superfamily protein		LOC_Os01g04370.1
GRMZM2G360234	-3.4	-2.8	-2.54644			hypothetical protein LOC100275469								LOC_Os03g13870.1
GRMZM2G149347	-1.3	-2.8	-2.6082			nucleic acid binding f		C3H		AT1G66810		Zinc finger C-x8-C-x5-C-x3-H type family protein		LOC_Os05g50080.1
GRMZM2G000435	-1.2	-2.8	-2.72607							AT4G00905		NC domain-containing protein-related		LOC_Os08g43350.1
GRMZM2G374475	-1.1	-2.8	-2.79053			lipid metabolic process				AT1G75900		GDSL-like Lipase/Acylhydrolase superfamily protein		LOC_Os02g01140.1
GRMZM2G137211	-2.2	-2.8	-3.06304			hypothetical protein LOC100384417				AT2G42320		nucleolar protein gar2-related		LOC_Os09g31230.1
GRMZM2G345991	-3	-2.8	-3.13518			microtubule				AT4G35240		Protein of unknown function (DUF630 and DUF632)		LOC_Os04g47480.1
GRMZM2G176651	-1.5	-2.8	-3.37611			hypothetical protein LOC100383537				AT1G03440		Leucine-rich repeat (LRR) family protein		LOC_Os05g33690.1
GRMZM2G125455	-1.4	-2.8	-3.40917			hypothetical protein LOC100276420				AT1G70280		NHL domain-containing protein		LOC_Os02g49770.1
GRMZM2G085568	-2.1	-2.8	-3.65363			Hypothetical protein LOC100276479				AT2G22795				LOC_Os06g36050.1
GRMZM2G018314		-2.8	-3.92146							AT5G37150		P-loop containing nucleoside triphosphate hydrolases superfamily protein		LOC_Os04g49270.1
GRMZM2G047187	-2.7	-2.8	-4.05654			hypothetical protein LOC100191596				AT2G16990		Major facilitator superfamily protein		LOC_Os11g05390.1
GRMZM2G062318		-2.8	-4.43734			hypothetical protein LOC100383291 (LOC100383291), mRNA				AT1G73360	ATHDG11,EDT1,HDG11	homeodomain GLABROUS 11		LOC_Os06g10600.1
GRMZM2G148167	-3.8	-2.8	-6.55561			hypothetical protein LOC100193781				AT5G34940	AtGUS3,GUS3	glucuronidase 3		LOC_Os06g08090.2
GRMZM5G816314	-1.2	-2.8				DNA binding				AT2G44940		Integrase-type DNA-binding superfamily protein		LOC_Os02g43970.1
AC196090.3_FG006	-1.2	-2.8								AT1G04110.1	SDD1	Subtilase family protein		LOC_Os03g02750.1
GRMZM2G458581	-1.3	-2.8				hypothetical protein LOC100274691								LOC_Os04g07280.1
GRMZM2G048194	-1.4	-2.8				erwinia induced protein 1				AT1G21880	LYM1	lysm domain GPI-anchored protein 1 precursor		LOC_Os06g10660.1
GRMZM2G474602	-1.6	-2.8
GRMZM2G306062	-1.6	-2.8				inositol or phosphatidylinositol phosphatase activity				AT3G63240		DNAse I-like superfamily protein		LOC_Os03g57950.1
AC216886.3_FG002	-1.7	-2.8								AT5G15890.1	TBL21	TRICHOME BIREFRINGENCE-LIKE 21		LOC_Os06g16170.1
GRMZM2G009426	-2.2	-2.8				hypothetical protein LOC100193366				AT3G18050				LOC_Os02g48094.1
GRMZM2G181540	-2.3	-2.8				Putative uncharacterized protein				AT5G67620				LOC_Os03g10320.1
GRMZM2G427603	-2.6	-2.8				hypothetical protein LOC100275872								LOC_Os04g56370.1
GRMZM2G093708		-2.8				hypothetical protein LOC100273850								LOC_Os10g26670.1
GRMZM2G000608		-2.8				hypothetical protein LOC100274885				AT1G54385		ARM repeat superfamily protein		LOC_Os11g37100.1
GRMZM2G038436		-2.8				calcium ion binding				AT1G76650	CML38	calmodulin-like 38		LOC_Os06g11030.1
GRMZM2G073671		-2.8				cyclin3				AT1G20610	CYCB2;3	Cyclin B2;3		LOC_Os06g51110.1
GRMZM2G339943		-2.8				LOC100282003				AT2G02850	ARPN	plantacyanin		LOC_Os02g49850.1
GRMZM2G048919		-2.8				hypothetical protein LOC100276658 (LOC100276658), mRNA				AT1G15760		Sterile alpha motif (SAM) domain-containing protein		LOC_Os06g43770.1
GRMZM2G352274		-2.8				LOC100275429				AT2G42260	PYM,UVI4	uv-b-insensitive 4		LOC_Os02g37850.1
GRMZM2G070092	-3.5	-2.7	-1.36034	-5.9		lipoxygenase7				AT1G17420	LOX3	lipoxygenase 3		LOC_Os03g08220.1
GRMZM5G801307	-3.8	-2.7	-3.48533	-5.2		hypothetical protein LOC100275640								LOC_Os01g16980.1
GRMZM2G475536	-4.3	-2.7	-4.13193	-3.4		hypothetical protein LOC100272638				AT1G23110				LOC_Os08g33640.1
AC213521.3_FG005	-2.6	-2.7	-3.578	-2.8						AT1G58290.1	HEMA1	Glutamyl-tRNA reductase family protein		LOC_Os10g35840.1
GRMZM2G121753	-2.8	-2.7	-2.94641	-2.5		DNA binding				AT4G39250	ATRL1,RL1,RSM2	RAD-like 1		LOC_Os01g47370.1
GRMZM2G001845		-2.7		-2.5		protein kinase activity				AT4G08850		Leucine-rich repeat receptor-like protein kinase family protein		LOC_Os10g32990.1
GRMZM2G413897	-2.5	-2.7	-1.2197	-2.3		16.9 kDa class I heat shock protein 2				AT1G07400		HSP20-like chaperones superfamily protein		LOC_Os01g04350.1
GRMZM2G157120	-4.2	-2.7	-2.95436	-2.3		hypothetical protein LOC100275550				AT3G52740				LOC_Os04g33610.1
GRMZM2G043493	-1.8	-2.7	-3.50162	-2.1		LOC100216770				AT2G40435				LOC_Os03g21970.1
GRMZM2G439195	-1.5	-2.7	-2.30778	-1.8		nicotianamine synthase 3				AT1G09240	ATNAS3,NAS3	nicotianamine synthase 3		LOC_Os07g48980.1
GRMZM2G410175		-2.7		2.3		peroxidase activity				AT3G21770		Peroxidase superfamily protein		LOC_Os05g41990.1
GRMZM2G368610		-2.7	3.03459			hypothetical protein LOC100191842				AT4G16820	PLA-I{beta]2	alpha/beta-Hydrolases superfamily protein		LOC_Os10g41270.1
GRMZM2G028286	-1.2	-2.7	-1.42832			Full-length cDNA clone ZM_BFb0311K05				AT4G07960	ATCSLC12,CSLC12	Cellulose-synthase-like C12		LOC_Os07g03260.1
GRMZM2G136453	-4.3	-2.7	-1.45966			LOC100191759				AT5G50400	ATPAP27,PAP27	purple acid phosphatase 27		LOC_Os08g41880.1
GRMZM2G133394		-2.7	-1.49686			hypothetical protein LOC100382168				AT1G79720		Eukaryotic aspartyl protease family protein		LOC_Os08g16660.1
GRMZM2G329195		-2.7	-1.65			protein binding				AT3G05200	ATL6	RING/U-box superfamily protein		LOC_Os06g11450.1
GRMZM2G058481		-2.7	-1.82665			homoiothermy				AT3G08600		Protein of unknown function (DUF1191)		LOC_Os12g02550.1
GRMZM2G105787	-1.9	-2.7	-1.8563			LOC100285558				AT1G58440	SQE1,XF1	FAD/NAD(P)-binding oxidoreductase family protein		LOC_Os03g12910.1
GRMZM2G123446	-1.1	-2.7	-1.99374			monooxygenase activity				AT1G13110	CYP71B7	cytochrome P450, family 71 subfamily B, polypeptide 7		LOC_Os06g43384.1
GRMZM2G097706	-2.4	-2.7	-1.99877			metabolic process				AT3G24503	ALDH1A,ALDH2C4,REF1	aldehyde dehydrogenase 2C4		LOC_Os01g40870.1
GRMZM2G100864		-2.7	-2.14644			phosphoribosylanthranilate transferase				AT3G57880		Calcium-dependent lipid-binding (CaLB domain) plant phosphoribosyltransferase family protein		LOC_Os05g30750.1
GRMZM2G073814	-1.8	-2.7	-2.18594			hypothetical protein LOC100383999				AT4G34200	EDA9	D-3-phosphoglycerate dehydrogenase		LOC_Os08g34720.1
GRMZM2G075921	-1.7	-2.7	-2.36438			actin binding				AT5G67470	ATFH6,FH6	formin homolog 6		LOC_Os10g20710.1
GRMZM2G121868		-2.7	-2.50376			nucleosome
GRMZM2G456471	-1.9	-2.7	-2.55283			LOC100281365				AT1G67070	DIN9,PMI2	Mannose-6-phosphate isomerase, type I		LOC_Os11g38810.1
GRMZM2G113373		-2.7	-2.6645			protein kinase activity				AT5G14210		Leucine-rich repeat protein kinase family protein		LOC_Os11g20360.2
GRMZM2G136838		-2.7	-2.72117			microtubule motor activity				AT1G18370	ATNACK1,HIK,NACK1	ATP binding microtubule motor family protein		LOC_Os01g33040.1
GRMZM2G106748	-2.6	-2.7	-2.74003			lipoxygenase				AT3G22400	LOX5	PLAT/LH2 domain-containing lipoxygenase family protein		LOC_Os05g23880.1
GRMZM2G105844		-2.7	-2.75804			product:alpha-expansin 2				AT1G69530	AT-EXP1,ATEXP1,ATEXPA1,ATHEXP ALPHA 1.2,EXP1,EXPA1	expansin A1		LOC_Os02g51040.1
GRMZM2G155086	-1.5	-2.7	-2.7676			cp protein				AT2G03350		Protein of unknown function, DUF538		LOC_Os03g11210.1
GRMZM2G088409	-1.7	-2.7	-2.92395			protein kinase activity				AT2G40120		Protein kinase superfamily protein		LOC_Os05g39080.1
GRMZM2G161291	-2.2	-2.7	-3.08119			hypothetical protein LOC100382394				AT1G72480		Lung seven transmembrane receptor family protein		LOC_Os09g26830.1
GRMZM2G068672	-2	-2.7	-3.65342			homeobox-leucine zipper protein ATHB-4		HB		AT4G16780	ATHB-2,ATHB2,HAT4,HB-2	homeobox protein 2		LOC_Os06g04850.1
AC189879.3_FG003	-1.5	-2.7	-3.6605							AT5G43810.1	AGO10,PNH,ZLL	Stabilizer of iron transporter SufD / Polynucleotidyl transferase		LOC_Os06g39640.1
GRMZM2G308884	-2.3	-2.7	-3.99084			Transcribed locus, strongly similar to XP_002438828.1 hypothetical protein SORBIDRAFT_10g026800 [Sorghum bicolor]				AT4G14180	AtPRD1,PRD1	putative recombination initiation defect 1		LOC_Os04g28020.1
GRMZM2G137694	-1	-2.7	-4.26518			catalytic activity				AT2G26640	KCS11	3-ketoacyl-CoA synthase 11		LOC_Os10g28060.1
GRMZM2G352601	-2.6	-2.7	-4.30364							AT1G28680		HXXXD-type acyl-transferase family protein		LOC_Os06g06180.1
GRMZM2G090652	-3	-2.7	-6.6328			lipid metabolic process				AT1G71691		GDSL-like Lipase/Acylhydrolase superfamily protein		LOC_Os04g47390.1
GRMZM2G451254	-1.2	-2.7				nucleosome				AT1G09200		Histone superfamily protein		LOC_Os04g34240.1
GRMZM2G143791	-1.4	-2.7				hypothetical protein LOC100279409				AT1G18650	PDCB3	plasmodesmata callose-binding protein 3		LOC_Os05g43690.1
GRMZM2G348846	-2.4	-2.7				hypothetical protein LOC100191218				AT5G44440		FAD-binding Berberine family protein		LOC_Os06g35560.1
GRMZM2G088290		-2.7
GRMZM2G088874		-2.7				ATP binding				AT2G01990				LOC_Os09g27590.1
GRMZM2G130912		-2.7				Clone 222458 mRNA sequence
GRMZM2G167658		-2.7				nucleotide binding				AT3G28860	ABCB19,ATABCB19,ATMDR1,ATMDR11,ATPGP19,MDR1,MDR11,PGP19	ATP binding cassette subfamily B19		LOC_Os03g08380.1
GRMZM2G065205		-2.7				hypothetical protein LOC100277877				AT4G02060	MCM7,PRL	Minichromosome maintenance (MCM2/3/5) family protein		LOC_Os12g37400.1
GRMZM2G074672		-2.7				protein CCC1				AT2G01770	ATVIT1,VIT1	vacuolar iron transporter 1		LOC_Os09g23300.1
GRMZM2G062396	-1.2	-2.6		-3.1		LOC100191369				AT3G51240	F3\'H,F3H,TT6	flavanone 3-hydroxylase		LOC_Os04g56700.1
GRMZM2G008792	-2	-2.6	-3.39317	-3		catalytic activity				AT2G41510	ATCKX1,CKX1	cytokinin oxidase/dehydrogenase 1		LOC_Os04g44230.1
GRMZM2G151903	-1.1	-2.6	-2.45024	-2.9		drug transmembrane transport				AT1G33110		MATE efflux family protein		LOC_Os11g03240.1
GRMZM2G339327	-4.6	-2.6		-2.9		Putative uncharacterized protein								LOC_Os11g07911.1
GRMZM2G138809	-1.9	-2.6	-2.39553	-2.6		hypothetical protein LOC100277873								LOC_Os08g04430.1
GRMZM2G067702	-1.9	-2.6	-1.69245	-2.5		ARR1 protein-like		G2-like		AT3G46640	LUX,PCL1	Homeodomain-like superfamily protein		LOC_Os01g74020.1
GRMZM2G151992	-2.1	-2.6	-2.46386	-2.5		catalytic/ hydrolase				AT5G02230		Haloacid dehalogenase-like hydrolase (HAD) superfamily protein		LOC_Os03g16670.1
GRMZM2G104347	-1.8	-2.6	-2.47232	-2.5		hypothetical protein LOC100216686				AT3G20300		Protein of unknown function (DUF3537)		LOC_Os06g42850.1
GRMZM2G177668		-2.6		-2.5		monooxygenase activity				AT3G48520	CYP94B3	cytochrome P450, family 94, subfamily B, polypeptide 3		LOC_Os11g29290.1
GRMZM2G038003	-2.1	-2.6	-2.6324	-2.3		LOC100275918				AT1G48330				LOC_Os01g18450.1
GRMZM2G158281	-1.9	-2.6	-2.42024	-1.8		nucleus				AT2G27230	LHW	transcription factor-related		LOC_Os11g06010.1
GRMZM2G114570	-1.4	-2.6	-1.38769			ankyrin protein kinase-like				AT1G33170		S-adenosyl-L-methionine-dependent methyltransferases superfamily protein		LOC_Os10g36690.1
GRMZM2G102356	-1.8	-2.6	-1.46397			Bet v I allergen				AT1G24020	MLP423	MLP-like protein 423		LOC_Os04g39150.1
GRMZM2G126763	-1	-2.6	-1.48113			glutathione transferase9				AT2G47730	ATGSTF5,ATGSTF8,GST6,GSTF8	glutathione S-transferase phi 8		LOC_Os03g04250.1
AC204212.4_FG001	-3	-2.6	-1.5782							AT1G75250.1	ATRL6,RL6,RSM3	RAD-like 6		LOC_Os05g50340.1
AC218972.3_FG004		-2.6	-1.60432							AT5G58300.1		Leucine-rich repeat protein kinase family protein		LOC_Os01g60330.1
GRMZM2G148200	-1.4	-2.6	-1.63679			inorganic diphosphatase activity				AT1G15690	ATAVP3,AtVHP1;1,AVP-3,AVP1	Inorganic H pyrophosphatase family protein		LOC_Os06g08080.1
GRMZM2G102521		-2.6	-1.83466			TSA: Zea mays contig55278, mRNA sequence				AT1G06470		Nucleotide/sugar transporter family protein		LOC_Os06g05980.2
GRMZM2G016586	-2.6	-2.6	-1.91153			hypothetical protein LOC100275798				AT3G55390		Uncharacterised protein family (UPF0497)		LOC_Os12g38100.1
GRMZM5G872264	-1.3	-2.6	-1.91252			actin binding				AT5G67470	ATFH6,FH6	formin homolog 6		LOC_Os10g20710.1
GRMZM5G807560		-2.6	-1.98069			Transcribed locus, weakly similar to XP_002463388.1 hypothetical protein SORBIDRAFT_02g042940 [Sorghum bicolor]				AT2G30395	ATOFP17,OFP17	ovate family protein 17		LOC_Os07g48140.1
GRMZM2G366607	-1.9	-2.6	-2.02702			hydrolase activity				AT3G10150	ATPAP16,PAP16	purple acid phosphatase 16		LOC_Os01g71420.1
GRMZM2G119850	-1.5	-2.6	-2.3539			hypothetical protein LOC100304322				AT3G56370		Leucine-rich repeat protein kinase family protein		LOC_Os03g21730.1
GRMZM2G163426	-1.7	-2.6	-2.39102			ASC1-like protein 1				AT1G13580	LAG13	LAG1 longevity assurance homolog 3		LOC_Os02g37080.1
GRMZM2G365160	-1.3	-2.6	-2.39378			3-deoxy-7-phosphoheptulonate synthase activity				AT1G22410		Class-II DAHP synthetase family protein		LOC_Os07g42960.1
GRMZM2G126781	-1.1	-2.6	-2.43124			Glutathione transferase13				AT2G30870	ATGSTF10,ATGSTF4,ERD13,GSTF10	glutathione S-transferase PHI 10		LOC_Os03g04240.1
GRMZM2G041866	-3.1	-2.6	-2.57393			LOC100283159				AT4G35160		O-methyltransferase family protein		LOC_Os05g43940.1
GRMZM2G030169		-2.6	-2.63738			actin-2				AT5G09810	ACT7	actin 7		LOC_Os10g36650.1
GRMZM2G145655	-1.7	-2.6	-2.6497			hypothetical protein LOC100384603				AT2G38640		Protein of unknown function (DUF567)		LOC_Os05g40630.1
GRMZM2G063192	-1.9	-2.6	-2.69271			cell division cycle protein 20				AT4G33270	CDC20.1	Transducin family protein / WD-40 repeat family protein		LOC_Os02g47180.1
GRMZM2G178769	-1.8	-2.6	-2.78492			transferase activity, transferring acyl groups other than amino-acyl groups				AT5G48930	HCT	hydroxycinnamoyl-CoA shikimate/quinate hydroxycinnamoyl transferase		LOC_Os08g43040.1
GRMZM2G001772		-2.6	-2.82507			Transcribed locus, weakly similar to XP_002466877.1 hypothetical protein SORBIDRAFT_01g015690 [Sorghum bicolor]								LOC_Os03g38640.1
GRMZM2G416105	-1.2	-2.6	-2.87913			Clone 389204 mRNA sequence				AT5G02640				LOC_Os05g02900.1
GRMZM2G576752	-1.6	-2.6	-2.8839			hypothetical protein LOC100280308				AT1G21240	WAK3	wall associated kinase 3		LOC_Os06g07330.1
GRMZM2G165390		-2.6	-3.05181			UDPG-flavonoid 3-oxy glucosyl transferase				AT5G17050	UGT78D2	UDP-glucosyl transferase 78D2		LOC_Os06g09240.1
GRMZM2G179638	-1.7	-2.6	-3.13362			LOC100275568				AT2G22795				LOC_Os06g36050.1
GRMZM2G124802	-2	-2.6	-3.14507			Clone 384103 mRNA sequence				AT1G01225		NC domain-containing protein-related		LOC_Os09g35810.1
GRMZM2G024705	-3.1	-2.6	-3.28795							AT5G20150	ATSPX1,SPX1	SPX domain gene 1		LOC_Os03g29250.1
GRMZM2G079807	-2	-2.6	-3.48546			hypothetical protein LOC100274601				AT5G40310		Exonuclease family protein		LOC_Os01g01770.1
GRMZM2G087503	-1.1	-2.6	-3.60877							AT1G78110				LOC_Os02g51720.1
GRMZM2G166082	-1.4	-2.6	-3.73075			GTP binding				AT2G18390	ARL2,ATARLC1,HAL,TTN5	ADP-ribosylation factor family protein		LOC_Os03g46920.1
GRMZM2G137118	-2.2	-2.6	-4.10961			protein kinase activity				AT3G44200	ATNEK6,IBO1,NEK6	NIMA (never in mitosis, gene A)-related 6		LOC_Os05g36960.1
GRMZM2G070515	-2.7	-2.6	-4.20836			Transcribed locus, moderately similar to XP_002462617.1 hypothetical protein SORBIDRAFT_02g029070 [Sorghum bicolor]								LOC_Os09g32540.1
GRMZM2G423555	-2.6	-2.6	-4.7621			Transcribed locus				AT2G30870	ATGSTF10,ATGSTF4,ERD13,GSTF10	glutathione S-transferase PHI 10		LOC_Os09g37240.1
GRMZM2G171752	-1.6	-2.6				hypothetical protein LOC100276146				AT1G78020		Protein of unknown function (DUF581)		LOC_Os06g11980.1
GRMZM2G339645	-1.9	-2.6				CSLF3 - cellulose synthase-like family F; beta1,3;1,4 glucan synthase				AT1G02730	ATCSLD5,CSLD5,SOS6	cellulose synthase-like D5		LOC_Os07g36750.1
GRMZM2G018760	-2.2	-2.6				mazG nucleotide pyrophosphohydrolase domain protein				AT3G25400				LOC_Os04g43550.1
GRMZM2G124179	-2.3	-2.6				phosphatase activity				AT5G45700		Haloacid dehalogenase-like hydrolase (HAD) superfamily protein		LOC_Os05g11570.1
GRMZM2G400109	-2.3	-2.6				histamine receptor activity				AT2G20030		RING/U-box superfamily protein		LOC_Os06g48065.1
GRMZM2G172204	-2.7	-2.6				hypothetical protein LOC100273394				AT1G19715		Mannose-binding lectin superfamily protein		LOC_Os12g14440.1
GRMZM5G803981	-2.8	-2.6				hypothetical protein LOC100382206				AT4G15210	AT-BETA-AMY,ATBETA-AMY,BAM5,BMY1,RAM1	beta-amylase 5		LOC_Os07g35880.1
GRMZM2G016351		-2.6				Clone 1582538 mRNA sequence
GRMZM2G088543		-2.6				Transcribed locus								LOC_Os02g33790.1
GRMZM2G456997		-2.6				extracellular region				AT4G33720		CAP (Cysteine-rich secretory proteins, Antigen 5, and Pathogenesis-related 1 protein) superfamily protein		LOC_Os01g28450.1
GRMZM2G346113		-2.6				nucleic acid binding				AT5G12440		CCCH-type zinc fingerfamily protein with RNA-binding domain		LOC_Os03g21140.1
GRMZM2G445169		-2.6				alpha-expansin 6				AT2G39700	ATEXP4,ATEXPA4,ATHEXP ALPHA 1.6,EXPA4	expansin A4		LOC_Os03g60720.1
GRMZM2G048165		-2.6				catalytic activity				AT4G39010	AtGH9B18,GH9B18	glycosyl hydrolase 9B18		LOC_Os09g36060.1
GRMZM2G440459		-2.6				catalytic activity				AT2G41250		Haloacid dehalogenase-like hydrolase (HAD) superfamily protein		LOC_Os07g46520.1
GRMZM2G447984		-2.6				Histone H3.2				AT1G09200		Histone superfamily protein		LOC_Os04g34240.1
GRMZM5G818101		-2.6				catalytic activity				AT1G72770	HAB1	homology to ABI1		LOC_Os05g49730.1
GRMZM2G114751		-2.6				membrane				AT4G30420		nodulin MtN21 /EamA-like transporter family protein		LOC_Os09g25810.2
GRMZM5G865943		-2.6				catalytic activity				AT4G35790	ATPLDDELTA,PLDDELTA	phospholipase D delta		LOC_Os09g37100.1
GRMZM2G062084		-2.6				microtubule motor activity				AT4G14330		P-loop containing nucleoside triphosphate hydrolases superfamily protein		LOC_Os02g56540.1
GRMZM2G413687		-2.6								AT1G07090	LSH6	Protein of unknown function (DUF640)		LOC_Os05g28040.1
GRMZM5G850997		-2.6				protein binding				AT1G74620		RING/U-box superfamily protein		LOC_Os09g36500.1
GRMZM2G060993		-2.6				hypothetical protein LOC100279546				AT3G16520	UGT88A1	UDP-glucosyl transferase 88A1		LOC_Os05g45180.1
GRMZM2G178894		-2.6				intracellular				AT2G41940	ZFP8	zinc finger protein 8		LOC_Os03g11680.1
GRMZM2G461465		-2.5	-2.6038	-3.5		Clone 465373 mRNA sequence
GRMZM2G145213	-1.7	-2.5	-1.61538	-3		hypothetical protein LOC100193401				AT1G34760	GF14 OMICRON,GRF11,RHS5	general regulatory factor 11		LOC_Os11g39540.1
GRMZM2G136364	-2.2	-2.5	-2.86435	-3		lipid transport				AT5G05960		Bifunctional inhibitor/lipid-transfer protein/seed storage 2S albumin superfamily protein		LOC_Os04g33920.1
GRMZM2G025175	-2.6	-2.5		-2.6		LOC100192702				AT1G29140		Pollen Ole e 1 allergen and extensin family protein		LOC_Os06g36240.1
GRMZM2G341302	-1.5	-2.5	-1.79173	-2.4		protein kinase activity				AT2G37710	RLK	receptor lectin kinase		LOC_Os07g03830.1
GRMZM2G135029	-2.9	-2.5	-2.38839	-2.2		monooxygenase activity				AT2G35660	CTF2A	FAD/NAD(P)-binding oxidoreductase family protein		LOC_Os07g30960.1
GRMZM2G018579	-1.8	-2.5	-2.22389	-2.1		hypothetical protein LOC100277382				AT2G36885				LOC_Os03g04470.1
GRMZM2G144730	-1.7	-2.5	-2.86355	-2.1		hypothetical protein LOC100272999				AT5G52920	PKP-BETA1,PKP1,PKP2	plastidic pyruvate kinase beta subunit 1		LOC_Os10g42100.1
GRMZM2G033971	-2.9	-2.5	-1.72878	-2		catalytic activity				AT3G61770		Acid phosphatase/vanadium-dependent haloperoxidase-related protein		LOC_Os05g45770.1
GRMZM2G368662	-2.1	-2.5	-1.99385	-2		hypothetical protein LOC100278919 (LOC100278919), mRNA				AT3G05725		Protein of unknown function (DUF3511)		LOC_Os03g19040.1
GRMZM2G060079	-2.1	-2.5	-2.32317	-2		iron ion binding				AT4G02940		oxidoreductase, 2OG-Fe(II) oxygenase family protein		LOC_Os05g33310.1
GRMZM2G065989	-2.4	-2.5	-2.04015	-1.9		Clone 298594 mRNA sequence				AT2G45130	ATSPX3,SPX3	SPX domain gene 3		LOC_Os03g29250.1
GRMZM2G477503	-3	-2.5	-3.24419	-1.9		biosynthetic process				AT5G01220	SQD2	sulfoquinovosyldiacylglycerol 2		LOC_Os01g04920.1
GRMZM2G070375	-1.1	-2.5		-1.9		FIP1				AT2G22475	GEM	GRAM domain family protein		LOC_Os09g29120.1
GRMZM2G106408	-1.4	-2.5	-2.33518	-1.8		hypothetical protein LOC100383295				AT5G24910	CYP714A1	cytochrome P450, family 714, subfamily A, polypeptide 1		LOC_Os03g21400.1
GRMZM2G085924	-2.2	-2.5		-1.8		herbicide safener binding protein1				AT4G35150		O-methyltransferase family protein		LOC_Os11g20090.1
GRMZM5G879278	-1.3	-2.5	-1.20524			Hypothetical protein LOC100274081				AT1G35780				LOC_Os07g43070.1
GRMZM2G013302	-1.5	-2.5	-1.50744			DNA binding		OFP		AT5G04820	ATOFP13,OFP13	ovate family protein 13		LOC_Os11g05770.1
GRMZM5G859526		-2.5	-1.61371			hypothetical protein LOC100192476
GRMZM2G427451		-2.5	-1.6724			AIR12				AT3G07390	AIR12	auxin-responsive family protein		LOC_Os08g41290.1
GRMZM2G138338		-2.5	-1.90133			hypothetical protein LOC100216746				AT3G28040		Leucine-rich receptor-like protein kinase family protein		LOC_Os01g72700.1
GRMZM5G875732	-2.8	-2.5	-1.94297			TSA: Zea mays contig28712, mRNA sequence
GRMZM2G089244	-1.9	-2.5	-2.03323			DNA binding				AT4G38620	ATMYB4,MYB4	myb domain protein 4		LOC_Os01g65370.1
GRMZM2G107629	-1.7	-2.5	-2.06798			metabolic process				AT1G04430		S-adenosyl-L-methionine-dependent methyltransferases superfamily protein		LOC_Os10g33720.1
GRMZM2G028779		-2.5	-2.07			zinc ion binding								LOC_Os01g66970.2
GRMZM2G057733	-1.4	-2.5	-2.08047			TSA: Zea mays contig47630, mRNA sequence				AT5G41800		Transmembrane amino acid transporter family protein		LOC_Os01g43320.1
GRMZM2G084116		-2.5	-2.08081			Clone 1288890 mRNA sequence
GRMZM2G128315	-1.3	-2.5	-2.11983			protein kinase activity				AT3G56370		Leucine-rich repeat protein kinase family protein		LOC_Os05g40050.1
GRMZM2G114127	-1.2	-2.5	-2.13912			hypothetical protein LOC100273267				AT1G49750		Leucine-rich repeat (LRR) family protein		LOC_Os02g40260.1
GRMZM2G369469		-2.5	-2.16688			membrane				AT1G75550		glycine-rich protein
GRMZM2G014193	-1.8	-2.5	-2.24047			hypothetical protein LOC100384711				AT4G13700	ATPAP23,PAP23	purple acid phosphatase 23		LOC_Os08g17784.1
GRMZM2G059634		-2.5	-2.28567			leukotriene receptor activity				AT2G01660	PDLP6	plasmodesmata-located protein 6		LOC_Os06g14280.1
GRMZM2G086880	-3	-2.5	-2.37557			transcription factor activity		HSF		AT3G24520	AT-HSFC1,HSFC1	heat shock transcription factor C1		LOC_Os01g43590.2
GRMZM2G047055	-1.4	-2.5	-2.3782			LOC100284092				AT3G12110	ACT11	actin-11		LOC_Os03g50885.1
GRMZM2G149837	-1.9	-2.5	-2.39988			catalytic activity				AT3G07210				LOC_Os01g68830.1
GRMZM2G342515	-1.3	-2.5	-2.50104			histone 2B5				AT3G45980	H2B,HTB9	Histone superfamily protein		LOC_Os03g17084.1
GRMZM2G077535	-2.2	-2.5	-2.66321			Transcribed locus, moderately similar to XP_002463458.1 hypothetical protein SORBIDRAFT_01g000255 [Sorghum bicolor]				AT5G41470		Nuclear transport factor 2 (NTF2) family protein		LOC_Os03g64380.1
GRMZM2G091916	-2.3	-2.5	-2.66349			LOC100191692				AT1G26760	ATXR1,SDG35	SET domain protein 35		LOC_Os03g07260.1
GRMZM2G446170	-1.7	-2.5	-2.84754			hypothetical protein LOC100194238				AT5G25610	ATRD22,RD22	BURP domain-containing protein		LOC_Os01g53240.1
GRMZM2G045748	-2.7	-2.5	-2.99971			DNA binding		MYB		AT3G28910	ATMYB30,MYB30	myb domain protein 30		LOC_Os08g33940.1
GRMZM2G005103	-2.6	-2.5	-3.46551			LOC100192027				AT2G38650	GAUT7,LGT7	galacturonosyltransferase 7		LOC_Os07g48370.1
GRMZM2G701688	-2.1	-2.5	-3.48018			LOC100272971				AT3G22790		Kinase interacting (KIP1-like) family protein		LOC_Os12g41200.1
AC205419.3_FG001	-2.3	-2.5	-3.55206							AT1G47900.1		Plant protein of unknown function (DUF869)		LOC_Os03g14250.1
GRMZM2G090500	-2	-2.5	-3.85399			hypothetical protein LOC100276359				AT1G65010		Plant protein of unknown function (DUF827)		LOC_Os05g02820.1
GRMZM2G132880		-2.5	-4.29617			ZCN6 protein				AT2G27550	ATC	centroradialis		LOC_Os11g05470.1
GRMZM2G163116		-2.5	-4.69136			hypothetical protein LOC100277657				AT3G08490				LOC_Os03g11710.1
GRMZM5G820401	-1.6	-2.5				hypothetical protein LOC100381942				AT4G18820		AAA-type ATPase family protein		LOC_Os05g45340.1
GRMZM2G131176	-1.6	-2.5				phosphoribosylanthranilate transferase (LOC100286098), mRNA				AT1G22610		C2 calcium/lipid-binding plant phosphoribosyltransferase family protein		LOC_Os05g35480.1
GRMZM5G821639	-3	-2.5				LOC100193750				AT4G11920	CCS52A2,FZR1	cell cycle switch protein 52 A2		LOC_Os01g74146.1
GRMZM2G115499	-3.1	-2.5				hypothetical protein LOC100279842				AT4G13370		Plant protein of unknown function (DUF936)		LOC_Os11g02740.1
GRMZM2G176605		-2.5				structural molecule activity				AT1G07710		Ankyrin repeat family protein		LOC_Os03g45290.1
GRMZM2G158890		-2.5				hypothetical protein LOC100278304				AT2G17080		Arabidopsis protein of unknown function (DUF241)		LOC_Os08g43770.1
GRMZM2G325026		-2.5				heme binding				AT1G60660	ATCB5LP,B5	cytochrome B5-like protein		LOC_Os08g29669.1
GRMZM5G859316		-2.5				LOC100282108				AT1G65680	ATEXPB2,ATHEXP BETA 1.4,EXPB2	expansin B2		LOC_Os03g44290.1
GRMZM2G148534		-2.5								AT4G12730	FLA2	FASCICLIN-like arabinogalactan 2		LOC_Os02g49420.1
GRMZM2G133895		-2.5				hypothetical protein LOC100383858				AT4G35930		F-box family protein		LOC_Os10g30280.1
GRMZM2G376548		-2.5				Transcribed locus				AT4G24960	ATHVA22D,HVA22D	HVA22 homologue D		LOC_Os08g36440.1
GRMZM2G179294		-2.5				high affinity nitrate transporter				AT5G50200	ATNRT3.1,NRT3.1,WR3	nitrate transmembrane transporters		LOC_Os02g38230.1
GRMZM5G832582		-2.5				hypothetical protein LOC100216624				AT3G11070		Outer membrane OMP85 family protein		LOC_Os05g39390.1
GRMZM2G303768		-2.5				protein kinase activity				AT5G07620		Protein kinase superfamily protein		LOC_Os04g46320.1
GRMZM2G115705		-2.5				hypothetical protein LOC100279279				AT4G21380	ARK3,RK3	receptor kinase 3		LOC_Os04g54140.1
GRMZM2G085054		-2.5				product:UDP-glucosyltransferase BX8				AT5G05900		UDP-Glycosyltransferase superfamily protein		LOC_Os11g25454.1
GRMZM2G030444		-2.5								AT2G01770	ATVIT1,VIT1	vacuolar iron transporter 1		LOC_Os09g23300.1
GRMZM2G118579		-2.5				hypothetical protein LOC100273667				AT2G36870	XTH32	xyloglucan endotransglucosylase/hydrolase 32		LOC_Os02g57770.1
GRMZM2G009223		-2.4	-2.12946	-3.6		glucose-6-phosphate/phosphate translocator 2				AT1G61800	ATGPT2,GPT2	glucose-6-phosphate/phosphate translocator 2		LOC_Os07g34006.1
GRMZM2G083130	-3.1	-2.4	-2.97708	-2.9		cytokinin-O-glucosyltransferase 2				AT1G22380	AtUGT85A3,UGT85A3	UDP-glucosyl transferase 85A3		LOC_Os02g51910.1
GRMZM2G134703	-2.3	-2.4	-3.75629	-2.8		monooxygenase activity				AT2G45510	CYP704A2	cytochrome P450, family 704, subfamily A, polypeptide 2		LOC_Os04g48460.1
GRMZM2G138382	-2.4	-2.4		-2.8		biosynthetic process				AT2G29690	ASA2,ATHANSYNAB	anthranilate synthase 2		LOC_Os03g61120.1
GRMZM2G158147	-2.3	-2.4	-2.13572	-2.6		bifunctional 3-phosphoadenosine 5-phosphosulfate synthetase 2				AT1G19920	APS2,ASA1	Pseudouridine synthase/archaeosine transglycosylase-like family protein		LOC_Os04g02050.1
GRMZM2G109674	-2.3	-2.4	-2.76282	-2.6		Full-length cDNA clone ZM_BFb0310A24				AT2G29970		Double Clp-N motif-containing P-loop nucleoside triphosphate hydrolases superfamily protein		LOC_Os11g01330.1
GRMZM2G531804	-2.3	-2.4	-1.74576	-2.5		Hypothetical protein LOC100276845
AC188710.4_FG006	-1.6	-2.4	-2.15368	-2.5						AT4G19090.1		Protein of unknown function (DUF594)		LOC_Os01g42340.1
GRMZM2G420684	-2.8	-2.4	-2.19486	-2.2		catalytic activity				AT3G61770		Acid phosphatase/vanadium-dependent haloperoxidase-related protein		LOC_Os05g45770.1
GRMZM5G802899	-1.8	-2.4		-2.2										LOC_Os05g44420.1
GRMZM2G077124	-2.3	-2.4		-2.2		transcription factor activity		bZIP		AT2G41070	ATBZIP12,DPBF4,EEL	Basic-leucine zipper (bZIP) transcription factor family protein		LOC_Os07g48660.1
GRMZM2G093286	-2.3	-2.4		-2.2		hypothetical protein LOC100279840				AT2G46660	CYP78A6	cytochrome P450, family 78, subfamily A, polypeptide 6		LOC_Os03g04190.1
GRMZM2G152895	-1.6	-2.4	-2.08693	-2.1		1-O-acylceramide synthase				AT1G27480		alpha/beta-Hydrolases superfamily protein		LOC_Os03g13030.2
GRMZM2G316136	-1.9	-2.4		-2.1		CBL-interacting serine/threonine-protein kinase 15				AT5G58380	CIPK10,PKS2,SIP1,SNRK3.8	SOS3-interacting protein 1		LOC_Os07g48100.1
GRMZM2G369130	-1.9	-2.4	-2.85987	-1.9		inositol or phosphatidylinositol phosphatase activity				AT2G32010	CVL1	CVP2 like 1		LOC_Os03g46090.1
GRMZM2G146437	-1.4	-2.4		-1.8		undecaprenyl pyrophosphate synthetase				AT5G58770		Undecaprenyl pyrophosphate synthetase family protein		LOC_Os01g63830.1
GRMZM2G010628	-1.4	-2.4	-2.49554	-1.7		hypothetical protein LOC100275572				AT5G61040				LOC_Os12g38730.1
GRMZM2G015886	-2.6	-2.4	-6.32745	2.3		hypothetical protein LOC100216739				AT1G02730	ATCSLD5,CSLD5,SOS6	cellulose synthase-like D5		LOC_Os12g36890.1
GRMZM5G844703	-1.4	-2.4	-1.19728			LOC100272399				AT1G78020		Protein of unknown function (DUF581)		LOC_Os08g31510.1
GRMZM2G132774	-1.2	-2.4	-1.28991							AT2G45080	cycp3;1	cyclin p3;1		LOC_Os04g46660.1
GRMZM2G166297	-1.4	-2.4	-1.34658			DNA binding				AT1G07430	HAI2	highly ABA-induced PP2C gene 2		LOC_Os01g62760.1
GRMZM2G021704	-2.6	-2.4	-1.49047			LOC100193190				AT4G22930	DHOASE,PYR4	pyrimidin 4		LOC_Os01g54370.1
GRMZM2G073223		-2.4	-1.51227			hypothetical protein LOC100383484				AT2G04160	AIR3	Subtilisin-like serine endopeptidase family protein		LOC_Os06g41880.1
GRMZM5G806833	-1.3	-2.4	-1.67679			hypothetical protein LOC100217221								LOC_Os08g41940.1
GRMZM2G093666	-2.5	-2.4	-1.67955			S-adenosylmethionine-dependent methyltransferase				AT1G78140		S-adenosyl-L-methionine-dependent methyltransferases superfamily protein		LOC_Os08g31750.1
GRMZM5G806108	-1.3	-2.4	-1.70286			protein kinase activity				AT3G19300		Protein kinase superfamily protein		LOC_Os04g35114.1
GRMZM2G019872	-2	-2.4	-1.73545			zinc ion binding				AT5G17000		Zinc-binding dehydrogenase family protein		LOC_Os06g40070.1
GRMZM2G425778	-1.8	-2.4	-1.7442			Clone 333914 mRNA sequence				AT5G58960	GIL1	Plant protein of unknown function (DUF641)		LOC_Os03g61040.1
GRMZM2G041765		-2.4	-1.76685			IQ calmodulin-binding motif family protein				AT5G62390	ATBAG7,BAG7	BCL-2-associated athanogene 7		LOC_Os06g01500.1
GRMZM2G129947	-1.1	-2.4	-1.80198			hypothetical protein LOC100273238				AT5G50150		Protein of Unknown Function (DUF239)		LOC_Os06g28000.1
GRMZM2G422419	-2.2	-2.4	-1.80456							AT1G56150		SAUR-like auxin-responsive protein family		LOC_Os12g43110.1
GRMZM2G180082	-2	-2.4	-1.84108			taxane 13-alpha-hydroxylase				AT5G36110	CYP716A1	cytochrome P450, family 716, subfamily A, polypeptide 1		LOC_Os07g33440.1
GRMZM2G381086	-1.8	-2.4	-1.84863			carbohydrate binding protein				AT5G03140		Concanavalin A-like lectin protein kinase family protein		LOC_Os05g03450.1
GRMZM2G046459		-2.4	-1.90531			LOC100216736				AT2G05790		O-Glycosyl hydrolases family 17 protein		LOC_Os02g53200.2
GRMZM2G043663	-1.3	-2.4	-1.95732							AT3G11650	NHL2	NDR1/HIN1-like 2		LOC_Os12g06220.1
GRMZM2G305526	-1.3	-2.4	-1.99701			hypothetical protein LOC100193025				AT5G60020	ATLAC17,LAC17	laccase 17		LOC_Os03g16610.1
GRMZM2G041761	-1.2	-2.4	-2.02866			plant-specific domain TIGR01568 family protein		OFP		AT2G36026		Ovate family protein		LOC_Os02g45620.1
GRMZM2G087169	-1.2	-2.4	-2.08465			metabolic process				AT4G15760	MO1	monooxygenase 1		LOC_Os02g27200.1
GRMZM5G852886		-2.4	-2.08711			pathogenesis-related protein PR-1				AT5G57625		CAP (Cysteine-rich secretory proteins, Antigen 5, and Pathogenesis-related 1 protein) superfamily protein		LOC_Os02g54540.1
GRMZM2G354209	-1.3	-2.4	-2.09876			Clone 232678 mRNA sequence				AT1G56150		SAUR-like auxin-responsive protein family		LOC_Os04g52670.1
GRMZM2G398848		-2.4	-2.17983							AT4G24390		RNI-like superfamily protein		LOC_Os03g08850.1
GRMZM2G015361	-1.2	-2.4	-2.24536			GTP binding				AT5G14670	ARFA1B,ATARFA1B	ADP-ribosylation factor A1B		LOC_Os01g16030.1
GRMZM2G160730	-1.3	-2.4	-2.26785			DNA binding		AP2-EREBP		AT4G36920	AP2,FL1,FLO2	Integrase-type DNA-binding superfamily protein		LOC_Os03g60430.1
GRMZM2G477325	-1.2	-2.4	-2.28745			hydrophobic protein LTI6A				AT3G05880	RCI2A	Low temperature and salt responsive protein family		LOC_Os07g44180.1
GRMZM2G177001	-1.1	-2.4	-2.69418			nucleic acid binding				AT4G03110	AtRBP-DR1,RBP-DR1	RNA-binding protein-defense related 1		LOC_Os05g30980.1
GRMZM2G018414	-1.5	-2.4	-2.75134			LOC100125643		GRF		AT4G37740	AtGRF2,GRF2	growth-regulating factor 2		LOC_Os03g47140.1
GRMZM2G388587	-1.4	-2.4	-2.79092			copper ion binding				AT5G05390	LAC12	laccase 12		LOC_Os12g01730.1
GRMZM2G161168	-1.6	-2.4	-2.84037			hypothetical protein LOC100383679				AT3G19340		Protein of unknown function (DUF3754)		LOC_Os01g70390.1
GRMZM2G413857		-2.4	-2.88927			hypothetical protein LOC100193284				AT5G56750	NDL1	N-MYC downregulated-like 1		LOC_Os01g09670.1
GRMZM2G114801	-2.3	-2.4	-3.08419			hypothetical protein LOC100194230				AT5G47740		Adenine nucleotide alpha hydrolases-like superfamily protein		LOC_Os06g18820.1
GRMZM2G125001		-2.4	-3.24367			hypothetical protein LOC100384585				AT5G58380	CIPK10,PKS2,SIP1,SNRK3.8	SOS3-interacting protein 1		LOC_Os12g02200.1
GRMZM2G133053		-2.4	-3.35263			fasciclin-like arabinogalactan protein 8				AT5G55730	FLA1	FASCICLIN-like arabinogalactan 1		LOC_Os09g30010.1
AC233953.1_FG004		-2.4	-3.39809							AT3G26700.1		Protein kinase superfamily protein		LOC_Os01g70970.1
GRMZM2G104710	-2.3	-2.4	-3.57648			methyltransferase activity				AT4G35160		O-methyltransferase family protein		LOC_Os06g13280.1
GRMZM2G037284		-2.4	-4.49629			LOC100280184				AT4G38260		Protein of unknown function (DUF833)		LOC_Os09g15480.1
GRMZM2G176173	-2.3	-2.4	-5.57149			hypothetical protein LOC100383826		C2C2-CO-like		AT5G57660	ATCOL5,COL5	CONSTANS-like 5		LOC_Os08g15050.1
GRMZM2G123407	-1.1	-2.4				copper ion binding				AT1G08500	AtENODL18,ENODL18	early nodulin-like protein 18		LOC_Os01g17470.1
GRMZM2G113863	-1.1	-2.4				copper chaperone				AT5G27690		Heavy metal transport/detoxification superfamily protein		LOC_Os07g47480.2
GRMZM2G116029	-1.3	-2.4				hypothetical protein LOC100275498				AT1G52140				LOC_Os05g11160.1
AC212353.4_FG004	-1.6	-2.4								AT5G40250.1		RING/U-box superfamily protein		LOC_Os06g12680.1
GRMZM2G426294	-1.9	-2.4				hypothetical protein LOC100276198				AT1G02816		Protein of unknown function, DUF538		LOC_Os11g13750.1
GRMZM2G127924	-2.1	-2.4				signal transducer activity				AT1G67900		Phototropic-responsive NPH3 family protein		LOC_Os02g38120.1
GRMZM2G004516	-2.2	-2.4				homoiothermy				AT4G17350		Plant protein of unknown function (DUF828) with plant pleckstrin homology-like region		LOC_Os10g41060.1
GRMZM2G098031	-2.3	-2.4								AT5G49810	MMT	methionine S-methyltransferase		LOC_Os05g01470.1
GRMZM2G003466	-2.5	-2.4				hypothetical protein LOC100216971		AP2-EREBP		AT4G39780		Integrase-type DNA-binding superfamily protein		LOC_Os03g09170.1
GRMZM2G003944	-2.7	-2.4				hypothetical protein LOC100382180		TCP		AT1G35560		TCP family transcription factor		LOC_Os11g07460.1
GRMZM2G058358	-4.5	-2.4				subtilisin-chymotrypsin inhibitor CI-1C				AT2G38870		Serine protease inhibitor, potato inhibitor I-type family protein		LOC_Os11g17790.1
GRMZM2G134552		-2.4				hypothetical protein LOC100272374		Orphans		AT2G42040				LOC_Os02g53360.1
GRMZM2G026558		-2.4				DNA binding				AT1G65710				LOC_Os04g44640.1
GRMZM5G828630		-2.4								AT1G72330	ALAAT2	alanine aminotransferase 2		LOC_Os10g25130.1
GRMZM2G064852		-2.4				Full-length cDNA clone ZM_BFb0337F04				AT3G03680		C2 calcium/lipid-binding plant phosphoribosyltransferase family protein		LOC_Os03g44890.1
GRMZM5G833140		-2.4				two-component sensor activity				AT2G01830	AHK4,ATCRE1,CRE1,WOL,WOL1	CHASE domain containing histidine kinase protein		LOC_Os03g50860.1
GRMZM2G005310		-2.4				chromatin				AT1G69770	CMT3	chromomethylase 3		LOC_Os03g12570.1
GRMZM2G107142		-2.4				PHI-1				AT2G35150	EXL1	EXORDIUM like 1		LOC_Os07g31430.1
GRMZM2G052111		-2.4				hypothetical protein LOC100272700				AT5G65700	BAM1	Leucine-rich receptor-like protein kinase family protein		LOC_Os05g51740.1
GRMZM2G178734		-2.4				protein transporter activity				AT4G32390		Nucleotide-sugar transporter family protein		LOC_Os12g04170.1
GRMZM2G067376		-2.4				plant-specific domain TIGR01568 family protein		OFP		AT5G01840	ATOFP1,OFP1	ovate family protein 1		LOC_Os05g25910.1
GRMZM2G043470		-2.4				hypothetical protein LOC100381573				AT4G34500		Protein kinase superfamily protein		LOC_Os03g12680.1
GRMZM2G436020		-2.4								AT3G15810		Protein of unknown function (DUF567)		LOC_Os01g56450.1
GRMZM2G144504		-2.4				LOC100193109				AT5G02010	ATROPGEF7,ROPGEF7	RHO guanyl-nucleotide exchange factor 7		LOC_Os05g38000.1
GRMZM2G061401		-2.4								AT3G27230		S-adenosyl-L-methionine-dependent methyltransferases superfamily protein		LOC_Os06g04680.1
GRMZM2G361388		-2.4				Transcribed locus, moderately similar to XP_002447209.1 hypothetical protein SORBIDRAFT_06g030460 [Sorghum bicolor]				AT1G15760		Sterile alpha motif (SAM) domain-containing protein		LOC_Os04g55120.1
GRMZM2G122447		-2.4				VQ motif family protein				AT3G58000		VQ motif-containing protein		LOC_Os06g41450.1
GRMZM2G152079	-2.8	-2.3	-4.37504	-3.7		TSA: Zea mays contig46189, mRNA sequence								LOC_Os04g11030.1
GRMZM2G055467	-2.6	-2.3		-2.5		hypothetical protein LOC100194175				AT2G41290	SSL2	strictosidine synthase-like 2		LOC_Os12g04424.1
GRMZM2G130230	-3.1	-2.3	-2.1207	-2.3		glucose-6-phosphate 1-dehydrogenase, cytoplasmic isoform				AT5G40760	G6PD6	glucose-6-phosphate dehydrogenase 6		LOC_Os02g38840.1
GRMZM2G134264	-3.1	-2.3	-2.34769	-2.3		hypothetical protein LOC100275466
GRMZM2G073054	-2.2	-2.3	-2.09345	-2.2		catalytic activity				AT5G03650	SBE2.2	starch branching enzyme 2.2		LOC_Os02g32660.1
GRMZM2G162755	-2	-2.3	-2.17078	-2.1		anthocyanidin 3-O-glucosyltransferase				AT2G18570		UDP-Glycosyltransferase superfamily protein		LOC_Os06g18670.1
GRMZM2G131912	-1.8	-2.3	-2.24994	-2.1		pectate lyase 8				AT4G13710		Pectin lyase-like superfamily protein		LOC_Os04g05050.1
GRMZM2G057459	-1.9	-2.3	-1.2887	-2		GABA-B receptor activity				AT1G05200	ATGLR3.4,GLR3.4,GLUR3	glutamate receptor 3.4		LOC_Os06g46670.2
GRMZM2G117030	-2.3	-2.3	-1.95275	-2		alpha-L-fucosidase 2				AT1G09390		GDSL-like Lipase/Acylhydrolase superfamily protein		LOC_Os01g22640.1
GRMZM5G813886	-1.5	-2.3	-1.99316	-2		hypothetical protein LOC100216600				AT5G06530		ABC-2 type transporter family protein		LOC_Os03g06139.1
GRMZM2G122296	-1.9	-2.3		-1.9		LOC542178				AT3G18000	NMT1,PEAMT,XPL1	S-adenosyl-L-methionine-dependent methyltransferases superfamily protein		LOC_Os01g50030.1
GRMZM2G027663	-1.8	-2.3	-1.36277	-1.8		LOC100285440				AT2G29630	PY,THIC	thiaminC		LOC_Os03g47610.1
GRMZM2G048582	-2	-2.3	-2.72398	-1.8		NIN-like protein 1		RWP-RK		AT1G76350		Plant regulator RWP-RK family protein		LOC_Os09g37710.1
GRMZM5G898755		-2.3	-1.39998	1.8		nonspecific lipid-transfer protein 4				AT2G38540	ATLTP1,LP1,LTP1	lipid transfer protein 1		LOC_Os11g02369.1
GRMZM2G039173	-2	-2.3	-1.53744			membrane				AT2G30300		Major facilitator superfamily protein		LOC_Os05g39800.1
GRMZM2G041127	-2.1	-2.3	-1.62021			LOC100194336		HB		AT4G40060	ATHB-16,ATHB16,HB16	homeobox protein 16		LOC_Os09g29460.1
GRMZM2G178887	-2	-2.3	-1.71399			ATP binding								LOC_Os02g55920.1
GRMZM2G355316	-1.1	-2.3	-1.75118			transcriptional regulatory protein algP
GRMZM2G178014	-1.9	-2.3	-1.78795			LOC100191431				AT1G32190		alpha/beta-Hydrolases superfamily protein		LOC_Os08g06420.1
GRMZM2G019356	-1.6	-2.3	-1.88554			Transcribed locus, strongly similar to XP_002436422.1 hypothetical protein SORBIDRAFT_10g002190 [Sorghum bicolor]				AT5G51550	EXL3	EXORDIUM like 3		LOC_Os06g04250.1
GRMZM2G165428	-2.9	-2.3	-1.8891			protein kinase activity				AT2G45340		Leucine-rich repeat protein kinase family protein		LOC_Os01g39600.1
GRMZM2G165007		-2.3	-1.94124			protein binding				AT5G60570		Galactose oxidase/kelch repeat superfamily protein		LOC_Os04g52830.1
GRMZM5G835276		-2.3	-1.98629			alpha-L-fucosidase 2				AT5G45910		GDSL-like Lipase/Acylhydrolase superfamily protein		LOC_Os06g06250.2
GRMZM2G180870		-2.3	-1.99821			Transcribed locus, strongly similar to NP_001149905.1 glycosyl hydrolases family 16 protein [Zea mays]								LOC_Os04g53950.1
GRMZM5G836190	-1.2	-2.3	-2.00063			product:PAN1				AT2G42290		Leucine-rich repeat protein kinase family protein		LOC_Os08g39590.1
GRMZM2G372102	-1.1	-2.3	-2.02899			36.4 kDa proline-rich protein				AT4G12470	AZI1	azelaic acid induced 1		LOC_Os04g55170.1
GRMZM2G074438		-2.3	-2.04944			structural molecule activity		bHLH		AT2G42300		basic helix-loop-helix (bHLH) DNA-binding superfamily protein		LOC_Os06g41060.1
GRMZM2G436730	-1.2	-2.3	-2.12251			protein binding				AT4G29240		Leucine-rich repeat (LRR) family protein		LOC_Os05g09640.1
GRMZM2G150754	-1.6	-2.3	-2.18775			Full-length cDNA clone ZM_BFb0317I13				AT3G23590	MED33A,RFR1	REF4-related 1		LOC_Os07g11000.1
GRMZM2G064096	-1.8	-2.3	-2.19218			hypothetical protein LOC100272933				AT5G20630	ATGER3,GER3,GLP3,GLP3A,GLP3B	germin 3		LOC_Os08g35760.1
GRMZM2G131749		-2.3	-2.19462			protein binding				AT4G20140	GSO1	Leucine-rich repeat transmembrane protein kinase		LOC_Os05g07820.1
AC204711.3_FG002	-1.1	-2.3	-2.23112							AT4G38650.1		Glycosyl hydrolase family 10 protein		LOC_Os05g23924.1
GRMZM5G879851	-1.5	-2.3	-2.23627			LOC100275156								LOC_Os05g38660.1
GRMZM2G053466	-1.1	-2.3	-2.27186			carbon-nitrogen ligase activity, with glutamine as amido-N-donor				AT5G64440	AtFAAH,FAAH	fatty acid amide hydrolase		LOC_Os11g06900.1
GRMZM2G102322		-2.3	-2.28669			hypothetical protein LOC100193817				AT3G58100	PDCB5	plasmodesmata callose-binding protein 5		LOC_Os06g34660.1
GRMZM2G085845	-3	-2.3	-2.32043			monooxygenase activity				AT5G07990	CYP75B1,D501,TT7	Cytochrome P450 superfamily protein		LOC_Os02g29960.1
GRMZM2G022820	-1.2	-2.3	-2.39987			DNA binding				AT3G25500	AFH1,AHF1,ATFH1,FH1	formin homology 1		LOC_Os01g67240.1
GRMZM5G871520	-1.3	-2.3	-2.43986			hypothetical protein LOC100383859				AT2G20300	ALE2	Protein kinase superfamily protein		LOC_Os02g57080.2
GRMZM2G076985	-1.7	-2.3	-2.5657			LOC100281206				AT1G76160	sks5	SKU5 similar 5		LOC_Os06g46500.1
AC226227.2_FG003		-2.3	-2.56671							AT4G06744.1		Leucine-rich repeat (LRR) family protein		LOC_Os04g42620.1
GRMZM2G104511	-1.2	-2.3	-2.59885			hypothetical protein LOC100304383				AT5G15740		O-fucosyltransferase family protein		LOC_Os06g17390.1
GRMZM2G017869		-2.3	-2.60558			anther-specific proline-rich protein APG				AT5G33370		GDSL-like Lipase/Acylhydrolase superfamily protein		LOC_Os02g57110.1
GRMZM2G003752		-2.3	-2.61716			fasciclin-like arabinogalactan protein 10				AT3G60900	FLA10	FASCICLIN-like arabinogalactan-protein 10		LOC_Os04g48490.1
GRMZM2G172410	-2.6	-2.3	-2.62512			TSA: Zea mays contig34415, mRNA sequence				AT5G43745		Protein of unknown function (DUF1012)		LOC_Os03g06720.1
GRMZM2G701058	-2.3	-2.3	-2.91762			Transcribed locus, strongly similar to XP_002438024.1 hypothetical protein SORBIDRAFT_10g006680 [Sorghum bicolor]				AT1G13560	AAPT1,ATAAPT1	aminoalcoholphosphotransferase 1		LOC_Os06g10280.1
GRMZM2G032655		-2.3	-3.15464			DNA binding		MYB		AT3G01140	AtMYB106,MYB106,NOK	myb domain protein 106		LOC_Os04g38740.1
GRMZM2G158313	-1.3	-2.3	-3.25965			transcription factor activity		bZIP		AT3G58120	ATBZIP61,BZIP61	Basic-leucine zipper (bZIP) transcription factor family protein		LOC_Os02g14910.1
GRMZM2G318992	-3.5	-2.3	-4.607			Transcribed locus, strongly similar to XP_002441239.1 hypothetical protein SORBIDRAFT_09g022910 [Sorghum bicolor]				AT1G09720		Kinase interacting (KIP1-like) family protein		LOC_Os05g39000.1
GRMZM2G461716	-1.1	-2.3				hypothetical protein LOC100272818				AT5G10770		Eukaryotic aspartyl protease family protein		LOC_Os06g02780.1
GRMZM2G172320	-1.2	-2.3				LOC100285835				AT5G20635				LOC_Os09g26999.1
GRMZM2G046994	-1.2	-2.3				metabolic process				AT3G02100		UDP-Glycosyltransferase superfamily protein		LOC_Os10g18510.1
GRMZM2G365298	-1.4	-2.3				hypothetical protein LOC100278841				AT4G35320				LOC_Os02g48470.1
GRMZM5G802115	-1.5	-2.3				protein kinase KIPK				AT3G25250	AGC2,AGC2-1,AtOXI1,OXI1	AGC (cAMP-dependent, cGMP-dependent and protein kinase C) kinase family protein		LOC_Os04g41160.1
GRMZM2G392477	-1.5	-2.3				protein kinase activity				AT2G44830		Protein kinase superfamily protein		LOC_Os10g41290.1
GRMZM2G438176	-1.6	-2.3				Transcribed locus								LOC_Os12g06980.1
GRMZM2G006714	-1.7	-2.3				hypothetical protein LOC100382095				AT5G57580		Calmodulin-binding protein		LOC_Os03g18960.1
GRMZM2G178546	-1.8	-2.3				trehalose-phosphate phosphatase				AT4G22590		Haloacid dehalogenase-like hydrolase (HAD) superfamily protein		LOC_Os10g40550.1
GRMZM2G066291	-1.8	-2.3								AT1G18810		phytochrome kinase substrate-related		LOC_Os10g26670.1
GRMZM2G029720	-2.4	-2.3				hypothetical protein LOC100193400								LOC_Os09g36790.1
GRMZM2G042865	-2.5	-2.3				hypothetical protein LOC100191999				AT2G36800	DOGT1,UGT73C5	don-glucosyltransferase 1		LOC_Os05g42020.1
GRMZM2G061396	-2.8	-2.3				LOC100284773				AT5G14360		Ubiquitin-like superfamily protein		LOC_Os01g67950.1
GRMZM2G173654	-3.8	-2.3				intracellular				AT1G27970	NTF2B	nuclear transport factor 2B		LOC_Os08g42000.1
GRMZM2G069389		-2.3				LOC100276102								LOC_Os04g57650.1
GRMZM2G090723		-2.3				Hypothetical protein LOC100277390
GRMZM2G160231		-2.3				hypothetical protein LOC100216650				AT1G78110				LOC_Os02g51720.1
GRMZM2G437758		-2.3				hypothetical protein LOC100277906				AT1G80180				LOC_Os06g39912.1
GRMZM5G868730		-2.3				PHI-1 (LOC100284458), mRNA
GRMZM2G376661		-2.3				monooxygenase activity				AT5G42650	AOS,CYP74A,DDE2	allene oxide synthase		LOC_Os03g55800.1
GRMZM2G112629		-2.3				hypothetical protein LOC100272488		bHLH		AT1G10585		basic helix-loop-helix (bHLH) DNA-binding superfamily protein		LOC_Os01g01870.1
GRMZM2G176141		-2.3				hypothetical protein LOC100279487		bHLH		AT1G68810		basic helix-loop-helix (bHLH) DNA-binding superfamily protein		LOC_Os09g24490.1
GRMZM2G104655		-2.3				hypothetical protein LOC100191493				AT5G10530		Concanavalin A-like lectin protein kinase family protein		LOC_Os09g16540.1
GRMZM2G178261		-2.3				LOC100285734		GRF		AT2G22840	AtGRF1,GRF1	growth-regulating factor 1		LOC_Os03g51970.1
AC196961.2_FG003		-2.3								AT3G53730.1		Histone superfamily protein		LOC_Os01g61920.1
GRMZM2G472696		-2.3				chromatin				AT3G45980	H2B,HTB9	Histone superfamily protein		LOC_Os03g17084.1
GRMZM2G035023		-2.3				hypothetical protein LOC100191955				AT5G07860		HXXXD-type acyl-transferase family protein		LOC_Os08g01980.1
GRMZM2G008583		-2.3				protein binding				AT5G23400		Leucine-rich repeat (LRR) family protein		LOC_Os04g58080.1
AC214817.3_FG004		-2.3								AT5G58300.1		Leucine-rich repeat protein kinase family protein		LOC_Os05g40200.1
GRMZM2G140996		-2.3				O-methyltransferase ZRP4				AT4G35160		O-methyltransferase family protein		LOC_Os05g43940.1
GRMZM2G019956		-2.3				DNA binding		ABI3VP1		AT4G31640		transcriptional factor B3 family protein		LOC_Os03g42230.1
GRMZM2G175910		-2.3				nucleic acid binding				AT2G16890		UDP-Glycosyltransferase superfamily protein		LOC_Os09g16030.1
AC217050.4_FG007	-3.3	-2.2	-2.87997	-3.2						AT5G23960.2	ATTPS21,TPS21	terpene synthase 21		LOC_Os07g11790.1
GRMZM2G059693	-3.7	-2.2		-3.2		triglyceride lipase activity				AT5G67050		alpha/beta-Hydrolases superfamily protein		LOC_Os05g06140.1
GRMZM2G531230	-2.4	-2.2		-2.9		hydrolase activity				AT3G16150		N-terminal nucleophile aminohydrolases (Ntn hydrolases) superfamily protein		LOC_Os04g58600.2
GRMZM2G051952	-2.2	-2.2	-1.76904	-2.7		Putative uncharacterized protein				AT4G28740				LOC_Os04g42800.1
GRMZM2G093526	-2.7	-2.2	-2.7984	-2.7		hypothetical protein LOC100274033				AT1G79460	ATKS,ATKS1,GA2,KS,KS1	Terpenoid cyclases/Protein prenyltransferases superfamily protein		LOC_Os04g52210.1
GRMZM2G053196	-2.8	-2.2	-3.47234	-2.5		Transcribed locus, strongly similar to XP_002438011.1 hypothetical protein SORBIDRAFT_10g006490 [Sorghum bicolor]				AT3G18110	EMB1270	Pentatricopeptide repeat (PPR) superfamily protein		LOC_Os06g09880.1
GRMZM2G032293	-2.8	-2.2	-3.42799	-2.3						AT1G51610		Cation efflux family protein		LOC_Os04g23180.1
GRMZM2G459715		-2.2	-1.97484	-2.2						AT5G06400		Pentatricopeptide repeat (PPR) superfamily protein		LOC_Os12g27060.1
GRMZM2G099305		-2.2	-1.43104	-2.1		hypothetical protein LOC100384002		GNAT		AT2G23060		Acyl-CoA N-acyltransferases (NAT) superfamily protein		LOC_Os03g55530.1
GRMZM2G152447	-2.2	-2.2	-1.97979	-2.1		LOC100284727				AT1G14700	ATPAP3,PAP3	purple acid phosphatase 3		LOC_Os03g13540.1
GRMZM2G135990	-4.2	-2.2	-2.19028	-2.1		hypothetical protein LOC100274630				AT5G22390		Protein of unknown function (DUF3049)		LOC_Os11g05550.1
GRMZM2G479546	-2.5	-2.2	-1.72533	-1.8		membrane				AT5G14120		Major facilitator superfamily protein		LOC_Os08g42010.1
GRMZM2G035579	-2.2	-2.2	-1.99536	-1.8		Transcribed locus, strongly similar to XP_002438650.1 hypothetical protein SORBIDRAFT_10g023590 [Sorghum bicolor]				AT2G26660	ATSPX2,SPX2	SPX domain gene 2		LOC_Os06g40120.1
GRMZM2G137498	-1.8	-2.2	-1.65642	-1.6		cytoplasm				AT3G57190		peptide chain release factor, putative		LOC_Os05g31160.1
GRMZM2G493395		-2.2	1.63292			catalytic activity				AT4G15560	CLA,CLA1,DEF,DXPS2,DXS	Deoxyxylulose-5-phosphate synthase		LOC_Os07g09190.1
GRMZM2G409771	-1.3	-2.2	-1.35372			hypothetical protein LOC100383110				AT4G13420	ATHAK5,HAK5	high affinity K+ transporter 5		LOC_Os03g37930.1
GRMZM2G444748	-1.6	-2.2	-1.41153			transcription factor activity				AT1G75390	AtbZIP44,bZIP44	basic leucine-zipper 44		LOC_Os02g03960.1
GRMZM2G110881	-1.3	-2.2	-1.41909			hypothetical protein LOC100191263				AT5G58490		NAD(P)-binding Rossmann-fold superfamily protein		LOC_Os03g60380.1
GRMZM2G101062	-1.4	-2.2	-1.4653			hypothetical protein LOC100217240				AT5G42560		Abscisic acid-responsive (TB2/DP1, HVA22) family protein		LOC_Os03g14610.1
GRMZM2G128934	-1.1	-2.2	-1.47492			Clone 622992 mRNA sequence				AT1G78880		Ubiquitin-specific protease family C19-related protein		LOC_Os08g13350.1
GRMZM2G064993	-1.3	-2.2	-1.50769			annexin p33				AT5G10230	ANN7,ANNAT7	annexin 7		LOC_Os06g11800.1
GRMZM2G013617	-1.9	-2.2	-1.50811			hypothetical protein LOC100272976		HB		AT5G41410	BEL1	POX (plant homeobox) family protein		LOC_Os06g01934.1
GRMZM2G430039	-1.8	-2.2	-1.5357			serine-type endopeptidase activity				AT1G04110	SDD1	Subtilase family protein		LOC_Os10g38080.1
GRMZM2G172014		-2.2	-1.54076			Clone 326213 mRNA sequence
GRMZM2G135359	-1.6	-2.2	-1.60833			hypothetical protein LOC100191492				AT4G18640	MRH1	Leucine-rich repeat protein kinase family protein		LOC_Os03g18370.1
GRMZM2G069523		-2.2	-1.64927			catalytic activity				AT1G52340	ABA2,ATABA2,ATSDR1,GIN1,ISI4,SDR1,SIS4,SRE1	NAD(P)-binding Rossmann-fold superfamily protein		LOC_Os04g33240.1
GRMZM2G175952		-2.2	-1.68272			harpin-induced protein				AT4G05220		Late embryogenesis abundant (LEA) hydroxyproline-rich glycoprotein family		LOC_Os07g34720.1
GRMZM2G162453	-1.3	-2.2	-1.69002			serine-type endopeptidase activity				AT1G20150		Subtilisin-like serine endopeptidase family protein		LOC_Os09g30458.1
GRMZM2G034896	-2.3	-2.2	-1.7006			hypothetical protein LOC100384248				AT1G09090	ATRBOHB,ATRBOHB-BETA,RBOHB	respiratory burst oxidase homolog B		LOC_Os01g25820.1
GRMZM2G141084		-2.2	-1.70346			hypothetical protein LOC100272794				AT3G63530	BB,BB2	RING/U-box superfamily protein		LOC_Os03g07790.1
GRMZM2G301271	-2.3	-2.2	-1.76037			cationic amino acid transporter				AT3G13620		Amino acid permease family protein		LOC_Os03g25920.1
GRMZM2G328781	-1.5	-2.2	-1.78203			protein kinase activity				AT5G07620		Protein kinase superfamily protein		LOC_Os04g46320.1
GRMZM2G175076	-2	-2.2	-1.86382			chalcone--flavonone isomerase				AT5G05270		Chalcone-flavanone isomerase family protein		LOC_Os11g02440.1
GRMZM2G425863	-1.7	-2.2	-1.87042			Hypothetical protein LOC100194060				AT2G23790		Protein of unknown function (DUF607)		LOC_Os10g35770.1
GRMZM2G046101		-2.2	-1.90448			glucan endo-1,3-beta-glucosidase 7				AT4G34480		O-Glycosyl hydrolases family 17 protein		LOC_Os03g46660.1
GRMZM2G124409	-1.5	-2.2	-1.97073			transcriptional regulatory protein algP
GRMZM2G176301	-1.9	-2.2	-2.05394			C-4 methylsterol oxidase				AT2G29390	ATSMO2,SMO2-2	sterol 4-alpha-methyl-oxidase 2-2		LOC_Os11g48020.1
GRMZM2G108149	-1.1	-2.2	-2.3094			LOC100273873				AT3G57880		Calcium-dependent lipid-binding (CaLB domain) plant phosphoribosyltransferase family protein		LOC_Os05g30750.1
GRMZM2G031983	-2.1	-2.2	-2.31622			transcription factor activity		C2C2-GATA		AT5G56860	GATA21,GNC	GATA type zinc finger transcription factor family protein		LOC_Os02g12790.1
GRMZM5G854880	-2.2	-2.2	-2.35728			protein kinase activity				AT2G02220	ATPSKR1,PSKR1	phytosulfokin receptor 1		LOC_Os02g02490.1
GRMZM2G047626	-2.6	-2.2	-2.42279			hypothetical protein LOC100272660		MYB		AT5G59780	ATMYB59,ATMYB59-1,ATMYB59-2,ATMYB59-3,MYB59	myb domain protein 59		LOC_Os12g37970.1
GRMZM2G414043	-1.5	-2.2	-2.5139			hypothetical protein LOC100273649				AT3G14172				LOC_Os07g42410.1
GRMZM2G025182	-1.4	-2.2	-2.53846			enzyme inhibitor activity				AT4G02320		Plant invertase/pectin methylesterase inhibitor superfamily		LOC_Os07g47830.1
GRMZM2G038934	-1.2	-2.2	-2.54023			lipid metabolic process				AT4G26690	GPDL2,MRH5,SHV3	PLC-like phosphodiesterase family protein		LOC_Os04g39610.1
GRMZM2G701063	-2.2	-2.2	-2.85612			anthocyanin regulatory C1 protein				AT5G49330	ATMYB111,MYB111,PFG3	myb domain protein 111		LOC_Os06g10350.1
GRMZM2G335638	-1.4	-2.2	-2.86128			hypothetical protein LOC100383536				AT2G20850	SRF1	STRUBBELIG-receptor family 1		LOC_Os02g07960.3
GRMZM2G177445	-1.6	-2.2	-3.0507			LOC100286004				AT5G59010		Protein kinase protein with tetratricopeptide repeat domain		LOC_Os03g61010.1
GRMZM2G121418		-2.2	-3.18115							AT4G11000		Ankyrin repeat family protein		LOC_Os06g18990.1
GRMZM2G147452	-1.7	-2.2	-3.22161			protein kinase activity				AT1G01225		NC domain-containing protein-related		LOC_Os08g43350.1
GRMZM2G122965	-1.8	-2.2	-3.55074			microtubule motor activity				AT2G47500		P-loop nucleoside triphosphate hydrolases superfamily protein with CH (Calponin Homology) domain		LOC_Os03g18980.1
GRMZM5G895383		-2.2	-3.92244			glutathione transferase16				AT2G30870	ATGSTF10,ATGSTF4,ERD13,GSTF10	glutathione S-transferase PHI 10		LOC_Os09g37240.1
GRMZM2G003909	-1.2	-2.2	-4.04796			hypothetical protein LOC100217260				AT2G21140	ATPRP2,PRP2	proline-rich protein 2		LOC_Os10g05750.1
GRMZM2G008691	-1.2	-2.2	-4.75142			LOC100193615		bHLH		AT1G72210		basic helix-loop-helix (bHLH) DNA-binding superfamily protein		LOC_Os02g52190.1
GRMZM2G044481	1.4	-2.2				magnesium ion binding				AT4G02780	ABC33,ATCPS1,CPS,CPS1,GA1	Terpenoid cyclases/Protein prenyltransferases superfamily protein		LOC_Os02g17780.1
GRMZM2G024718	1.2	-2.2				heat shock 70 kDa protein 1				AT2G32120	HSP70T-2	heat-shock protein 70T-2		LOC_Os03g11910.1
GRMZM2G060054	-1	-2.2				hydrogen ion transmembrane transporter activity				AT1G75630	AVA-P4	vacuolar H+-pumping ATPase 16 kDa proteolipid subunit 4		LOC_Os06g06160.1
GRMZM2G030038	-1.1	-2.2				hypothetical protein LOC100278652				AT4G22190				LOC_Os01g69290.1
GRMZM2G131516	-1.1	-2.2				protein SCARECROW		GRAS		AT3G54220	SCR,SGR1	GRAS family transcription factor		LOC_Os11g03110.1
GRMZM2G010693	-1.1	-2.2				hypothetical protein LOC100383570				AT1G60800	NIK3	NSP-interacting kinase 3		LOC_Os01g07630.1
GRMZM2G127821	-1.1	-2.2				Clone 363850 mRNA sequence				AT3G15040		Protein of unknown function, DUF584		LOC_Os04g45834.1
GRMZM2G127309	-1.2	-2.2				nucleosome				AT1G09460		Carbohydrate-binding X8 domain superfamily protein		LOC_Os03g61780.1
GRMZM2G465383	-1.2	-2.2				SAUR25 - auxin-responsive SAUR family member				AT1G79130		SAUR-like auxin-responsive protein family		LOC_Os06g45950.1
GRMZM2G121621	-1.4	-2.2				hypothetical protein LOC100191500				AT2G33570		Domain of unknown function (DUF23)		LOC_Os06g41910.1
GRMZM2G177314	-1.4	-2.2				ATP-binding cassette sub-family G member 2				AT1G17840	ABCG11,ATWBC11,COF1,DSO,WBC11	white-brown complex homolog protein 11		LOC_Os10g35180.1
GRMZM2G350205	-1.5	-2.2				hypothetical protein LOC100382699
GRMZM2G042198	-1.5	-2.2				hypothetical protein LOC100193195		C2C2-CO-like		AT3G07650	COL9	CONSTANS-like 9		LOC_Os02g49230.2
GRMZM2G103847	-1.6	-2.2				hypothetical protein LOC100279961				AT5G47900		Protein of unknown function (DUF1624)		LOC_Os04g33200.1
GRMZM2G074546	-1.7	-2.2				extracellular matrix structural constituent				AT2G32540	ATCSLB04,ATCSLB4,CSLB04	cellulose synthase-like B4		LOC_Os10g20090.1
GRMZM2G018275	-1.8	-2.2				wound/stress protein				AT4G39730		Lipase/lipooxygenase, PLAT/LH2 family protein		LOC_Os04g38390.1
GRMZM2G113844	-2	-2.2				flavin-containing monooxygenase activity				AT1G19250	FMO1	flavin-dependent monooxygenase 1		LOC_Os04g14690.1
GRMZM2G053946	-2	-2.2				hypothetical protein LOC100276419				AT1G19360		Nucleotide-diphospho-sugar transferase family protein		LOC_Os07g39840.1
GRMZM2G552966	-2.1	-2.2												LOC_Os03g03320.1
GRMZM2G300924	-2.3	-2.2				DNA binding				AT1G78080	RAP2.4	related to AP2 4		LOC_Os02g42585.1
GRMZM2G315431	-2.7	-2.2				ubiquitin-protein ligase				AT1G10560	ATPUB18,PUB18	plant U-box 18		LOC_Os09g21120.1
GRMZM2G031660	-2.8	-2.2				hypothetical protein LOC100272792				AT1G61820	BGLU46	beta glucosidase 46		LOC_Os04g43410.1
GRMZM2G132331	-3.1	-2.2				lipid metabolic process				AT5G55050		GDSL-like Lipase/Acylhydrolase superfamily protein		LOC_Os06g50940.1
GRMZM2G178693	-3.2	-2.2				plasma membrane intrinsic protein				AT2G37170	PIP2;2,PIP2B	plasma membrane intrinsic protein 2		LOC_Os04g44060.1
GRMZM2G146130		-2.2				G-protein coupled receptor protein signaling pathway								LOC_Os01g11210.1
GRMZM2G466532		-2.2				Transcribed locus								LOC_Os02g56490.1
GRMZM2G560811		-2.2
GRMZM2G102483		-2.2				hypothetical protein LOC100277079				AT4G38810		Calcium-binding EF-hand family protein		LOC_Os03g14590.1
GRMZM2G139467		-2.2				hypothetical protein LOC100279968				AT5G07990	CYP75B1,D501,TT7	Cytochrome P450 superfamily protein		LOC_Os03g44740.1
GRMZM2G150688		-2.2				LOC100284720				AT1G10588		Gibberellin-regulated family protein		LOC_Os03g41060.1
GRMZM2G410916		-2.2				transferase activity, transferring glycosyl groups				AT3G18170		Glycosyltransferase family 61 protein		LOC_Os01g02900.1
GRMZM2G151044		-2.2				hypothetical protein LOC100381600				AT1G35910		Haloacid dehalogenase-like hydrolase (HAD) superfamily protein		LOC_Os02g51680.1
AC210517.3_FG003		-2.2								AT4G27670.1	HSP21	heat shock protein 21		LOC_Os10g07200.1
GRMZM2G130079		-2.2				Histone H3.2				AT1G09200		Histone superfamily protein		LOC_Os04g34240.1
GRMZM2G107027		-2.2				3-N-debenzoyl-2-deoxytaxol N-benzoyltransferase				AT3G62160		HXXXD-type acyl-transferase family protein		LOC_Os06g39390.1
GRMZM2G109130		-2.2				lipoxygenase				AT1G55020	ATLOX1,LOX1	lipoxygenase 1		LOC_Os03g52860.1
GRMZM2G099340		-2.2				metallothionein-like protein type 2				AT3G09390	ATMT-1,ATMT-K,MT2A	metallothionein 2A		LOC_Os12g38270.1
AC199068.2_FG017		-2.2								AT1G59780.1		NB-ARC domain-containing disease resistance protein		LOC_Os07g01530.1
GRMZM2G066602		-2.2				thaumatin-like protein				AT2G28790		Pathogenesis-related thaumatin superfamily protein		LOC_Os12g38120.1
GRMZM2G157760		-2.2				hypothetical protein LOC100191939				AT5G58670	ATPLC,ATPLC1,PLC1	phospholipase C1		LOC_Os05g03610.1
GRMZM2G392106		-2.2				homoiothermy				AT5G22930		Protein of unknown function (DUF1635)		LOC_Os05g02450.1
GRMZM2G304474		-2.2				hypothetical protein LOC100275502 (LOC100275502), mRNA				AT1G80120		Protein of unknown function (DUF567)		LOC_Os01g56450.1
GRMZM2G062179		-2.2				serine-type carboxypeptidase activity				AT5G08260	scpl35	serine carboxypeptidase-like 35		LOC_Os04g44410.1
GRMZM2G110558		-2.2				hypothetical protein LOC100274751				AT4G30440	GAE1	UDP-D-glucuronate 4-epimerase 1		LOC_Os02g54890.1
GRMZM2G152089	-2.5	-2.1	-3.64748	-5		LOC100278001								LOC_Os04g11040.1
GRMZM2G164074	-2.5	-2.1		-3.4		hypothetical protein LOC100381980				AT3G48520	CYP94B3	cytochrome P450, family 94, subfamily B, polypeptide 3		LOC_Os11g29290.1
GRMZM2G568636	-3.2	-2.1		-3		binding				AT1G77760	GNR1,NIA1,NR1	nitrate reductase 1		LOC_Os08g36480.1
GRMZM2G035517		-2.1	-2.29473	-2.9		hypothetical protein LOC100304263				AT3G63470	scpl40	serine carboxypeptidase-like 40		LOC_Os03g26930.1
GRMZM2G141320	-4	-2.1	-2.4945	-2.3		hypothetical protein LOC100383973				AT2G11810	ATMGD3,MGD3,MGDC	monogalactosyldiacylglycerol synthase type C		LOC_Os08g20420.1
GRMZM2G152975	-2.6	-2.1	-3.10767	-2.3		hypothetical protein LOC100383565				AT1G64710		GroES-like zinc-binding dehydrogenase family protein		LOC_Os10g07229.1
GRMZM5G850015	-1.4	-2.1		-2.3		pyridoxin biosynthesis protein ER1				AT5G01410	ATPDX1,ATPDX1.3,PDX1,PDX1.3,RSR4	Aldolase-type TIM barrel family protein		LOC_Os07g01020.1
GRMZM2G012566	-2.5	-2.1	-1.28958	-2		hypothetical protein LOC100277295 (LOC100277295), mRNA
GRMZM2G127123		-2.1	-2.14786	-1.9		hydrolase activity, hydrolyzing O-glycosyl compounds				AT2G28470	BGAL8	beta-galactosidase 8		LOC_Os03g15020.1
GRMZM2G103945	-1.7	-2.1		-1.9		oxygen binding
GRMZM2G058227	-1.9	-2.1	-1.89282	-1.8		LOC100283806				AT5G08030		PLC-like phosphodiesterases superfamily protein		LOC_Os03g40670.1
GRMZM2G345622	-2.3	-2.1	-2.31439	-1.8		hypothetical protein LOC100278220				AT4G10520		Subtilase family protein		LOC_Os02g16940.1
GRMZM5G875238	-2	-2.1	-1.43681	-1.7		sucrose phosphate synthase1				AT1G04920	ATSPS3F,SPS3F	sucrose phosphate synthase 3F		LOC_Os01g69030.2
GRMZM2G373522		-2.1	1.68206			dehydrin				AT1G20450	ERD10,LTI29,LTI45	Dehydrin family protein		LOC_Os02g44870.1
GRMZM2G027960		-2.1	1.55659			intracellular		C2H2		AT1G08290	WIP3	WIP domain protein 3		LOC_Os05g37190.1
GRMZM2G174799		-2.1	-1.20908			LOC100281204				AT2G04780	FLA7	FASCICLIN-like arabinoogalactan 7		LOC_Os09g30486.1
GRMZM2G068322		-2.1	-1.35785			harpin-induced protein				AT1G17620		Late embryogenesis abundant (LEA) hydroxyproline-rich glycoprotein family		LOC_Os01g09880.1
GRMZM2G136910	-1.1	-2.1	-1.38869			0								LOC_Os11g06720.1
GRMZM2G106578		-2.1	-1.42925			diacylglycerol kinase 3				AT2G20900	ATDGK5,DGK5	diacylglycerol kinase 5		LOC_Os04g54200.1
GRMZM2G160569	-1.9	-2.1	-1.43655			LOC100274042				AT3G05910		Pectinacetylesterase family protein		LOC_Os07g44070.1
GRMZM2G427618	-1.2	-2.1	-1.48558			gibberellin 2-beta-dioxygenase				AT1G78440	ATGA2OX1,GA2OX1	Arabidopsis thaliana gibberellin 2-oxidase 1		LOC_Os01g55240.1
AC202185.4_FG004		-2.1	-1.50027							AT4G27670.1	HSP21	heat shock protein 21		LOC_Os10g07210.1
GRMZM2G140299	-1.4	-2.1	-1.50888			hypothetical protein LOC100192028		C2H2		AT5G03510		C2H2-type zinc finger family protein		LOC_Os04g08060.1
GRMZM2G121151	-1.6	-2.1	-1.54007			hypothetical protein LOC100275474				AT2G41940	ZFP8	zinc finger protein 8		LOC_Os02g53530.1
GRMZM2G144873	-1	-2.1	-1.58017			protein amino acid glycosylation				AT1G32930		Galactosyltransferase family protein		LOC_Os08g02370.1
GRMZM2G169201	-1.2	-2.1	-1.58706			membrane				AT1G19230		Riboflavin synthase-like superfamily protein		LOC_Os09g26660.1
GRMZM2G099191	-1.3	-2.1	-1.61763			catalytic activity				AT4G30110	ATHMA2,HMA2	heavy metal atpase 2		LOC_Os07g12900.1
GRMZM2G028637	-1.1	-2.1	-1.61938			LOC100273799				AT5G25510		Protein phosphatase 2A regulatory B subunit family protein		LOC_Os01g08310.1
GRMZM2G167786		-2.1	-1.65148			hypothetical protein LOC100191542				AT3G17640		Leucine-rich repeat (LRR) family protein		LOC_Os06g28480.1
GRMZM2G011071	-1.1	-2.1	-1.67464			Clone 1542542 mRNA sequence				AT2G37300				LOC_Os03g17500.1
GRMZM2G003406	-1	-2.1	-1.67844			myb-related protein Hv33		MYB		AT5G26660	ATMYB86,MYB86	myb domain protein 86		LOC_Os01g50720.1
GRMZM2G110145	-1.3	-2.1	-1.70623			membrane				AT5G16910	ATCSLD2,CSLD2	cellulose-synthase like D2		LOC_Os08g06380.1
AC206223.3_FG001	-1.3	-2.1	-1.71138							AT1G07120.1				LOC_Os03g18300.1
GRMZM2G017555		-2.1	-1.7227			hypothetical protein LOC100191701				AT3G05620		Plant invertase/pectin methylesterase inhibitor superfamily		LOC_Os01g15039.1
GRMZM2G123371		-2.1	-1.79174			LOC100193340				AT1G76550		Phosphofructokinase family protein		LOC_Os02g48360.1
GRMZM5G836174	-1.9	-2.1	-1.82339			phosphatase activity				AT1G73010	ATPS2,PS2	phosphate starvation-induced gene 2		LOC_Os01g52230.1
GRMZM2G111324	-1.6	-2.1	-1.84862			hypothetical protein LOC100191471				AT2G01630		O-Glycosyl hydrolases family 17 protein		LOC_Os03g12140.1
GRMZM2G068955	-1.8	-2.1	-1.86398			TSA: Zea mays contig28468, mRNA sequence				AT1G67570		Protein of unknown function (DUF3537)		LOC_Os08g03430.1
AC211276.4_FG008	-1.2	-2.1	-1.86893							AT3G52060.1		Core-2/I-branching beta-1,6-N-acetylglucosaminyltransferase family protein		LOC_Os03g44580.1
GRMZM2G035465	-1.7	-2.1	-1.89224			nucleus		AUX/IAA		AT4G29080	IAA27,PAP2	phytochrome-associated protein 2		LOC_Os05g14180.1
GRMZM2G344911	-1	-2.1	-1.95992			estradiol 17-beta-dehydrogenase 8				AT4G13180		NAD(P)-binding Rossmann-fold superfamily protein		LOC_Os03g53690.1
GRMZM2G179120	-1.5	-2.1	-1.97856			hypothetical protein LOC100279397				AT2G46210		Fatty acid/sphingolipid desaturase		LOC_Os09g16920.1
GRMZM2G158240	-2.3	-2.1	-1.97972			pectinesterase-2				AT3G59010	PME61	pectin methylesterase 61		LOC_Os02g54190.1
GRMZM5G882427	-2	-2.1	-1.99064			transferase				AT5G61160	AACT1	anthocyanin 5-aromatic acyltransferase 1		LOC_Os04g54560.1
GRMZM2G352132		-2.1	-2.00506			voltage-gated potassium channel activity				AT5G58000		Reticulon family protein		LOC_Os08g17870.1
GRMZM2G110295		-2.1	-2.03648			DNA binding		C2C2-GATA		AT2G45050	GATA2	GATA transcription factor 2		LOC_Os10g40810.1
GRMZM2G108959	-1.6	-2.1	-2.17568			hypothetical protein LOC100384664		MYB		AT1G08810	AtMYB60,MYB60	myb domain protein 60		LOC_Os11g35390.1
GRMZM2G368126		-2.1	-2.18736							AT4G34380		Transducin/WD40 repeat-like superfamily protein		LOC_Os12g40260.1
GRMZM2G168681	-1.3	-2.1	-2.22284			geranylgeranyl-diphosphate synthase				AT5G47770	FPS1	farnesyl diphosphate synthase 1		LOC_Os01g50760.1
GRMZM2G039454	-1.2	-2.1	-2.25925			protein binding				AT4G32410	AtCESA1,CESA1,RSW1	cellulose synthase 1		LOC_Os05g08370.1
GRMZM2G111191	-1.7	-2.1	-2.27254			zinc ion binding				AT1G69420		DHHC-type zinc finger family protein		LOC_Os03g11110.1
GRMZM2G034417	-1.7	-2.1	-2.30638			inositol or phosphatidylinositol phosphatase activity				AT3G02870	VTC4	Inositol monophosphatase family protein		LOC_Os03g39000.1
GRMZM2G461671		-2.1	-2.31764							AT3G50150		Plant protein of unknown function (DUF247)		LOC_Os06g33350.1
GRMZM2G048651		-2.1	-2.31851			hypothetical protein LOC100383237				AT1G03440		Leucine-rich repeat (LRR) family protein		LOC_Os11g42450.1
GRMZM2G004521		-2.1	-2.35598							AT5G60570		Galactose oxidase/kelch repeat superfamily protein		LOC_Os04g52830.1
GRMZM2G178892	-1.5	-2.1	-2.37267			LOC100281388				AT5G20410	ATMGD2,MGD2	monogalactosyldiacylglycerol synthase 2		LOC_Os02g55910.1
GRMZM2G462803	-1.3	-2.1	-2.5134			guanyl-nucleotide exchange factor activity				AT4G16340	SPK1	guanyl-nucleotide exchange factors;GTPase binding;GTP binding		LOC_Os03g21080.1
GRMZM2G117742	-1.7	-2.1	-2.51897			hypothetical protein LOC100274334				AT5G06700	TBR	Plant protein of unknown function (DUF828)		LOC_Os01g42810.1
GRMZM2G041463	-2	-2.1	-2.64319			CBL-interacting serine/threonine-protein kinase 15				AT5G58380	CIPK10,PKS2,SIP1,SNRK3.8	SOS3-interacting protein 1		LOC_Os05g26820.1
GRMZM2G465169	-1.4	-2.1	-2.65707			Clone 1634167 mRNA sequence				AT4G26760	MAP65-2	microtubule-associated protein 65-2		LOC_Os06g20370.1
GRMZM2G150962		-2.1	-2.81073			LOC100281702				AT5G50150		Protein of Unknown Function (DUF239)		LOC_Os01g07570.1
GRMZM2G096470	-1.5	-2.1	-2.81616			Rab GTPase activator activity				AT3G55020		Ypt/Rab-GAP domain of gyp1p superfamily protein		LOC_Os01g61860.1
GRMZM2G089493	-1.3	-2.1	-2.95921			LOC100191708				AT2G20870		cell wall protein precursor, putative		LOC_Os07g37850.1
GRMZM2G098859	-1.8	-2.1	-2.96412			Transcribed locus, strongly similar to NP_001141535.1 hypothetical protein LOC100273649 [Zea mays]				AT3G14172				LOC_Os07g42410.1
AC190909.3_FG004	-2.4	-2.1	-2.99473							AT5G13000.1	ATGSL12,gsl12	glucan synthase-like 12		LOC_Os06g51270.1
GRMZM2G135381	-1.6	-2.1	-3.27511			transcription factor activity		C2C2-GATA		AT5G25830	GATA12	GATA transcription factor 12		LOC_Os05g44400.1
GRMZM2G085678	-1.7	-2.1	-3.41287			ethylene responsive element		AP2-EREBP		AT1G15360	SHN1,WIN1	Integrase-type DNA-binding superfamily protein		LOC_Os02g10760.1
GRMZM2G179703	-1.8	-2.1	-3.46369			homoiothermy
GRMZM2G125704	-3.3	-2.1	-3.53442			calcium-dependent protein kinase substrate protein		G2-like		AT5G45580		Homeodomain-like superfamily protein		LOC_Os04g51130.1
GRMZM2G355771	-3.1	-2.1	-3.73691			TSA: Zea mays contig12284, mRNA sequence				AT3G22790		Kinase interacting (KIP1-like) family protein		LOC_Os03g43684.1
GRMZM2G124524		-2.1	-4.23184			hypothetical protein LOC100217237		AP2-EREBP		AT3G54320	ASML1,ATWRI1,WRI,WRI1	Integrase-type DNA-binding superfamily protein		LOC_Os12g03290.1
GRMZM2G120938	-1.1	-2.1	-4.36696			male sterility protein 2				AT5G22500	FAR1	fatty acid reductase 1		LOC_Os08g20200.1
GRMZM2G126507	-1	-2.1				LOC100273108		Tify		AT1G19180	JAZ1,TIFY10A	jasmonate-zim-domain protein 1		LOC_Os09g23660.1
GRMZM2G131262	-1.1	-2.1				TSA: Zea mays contig28629, mRNA sequence
GRMZM2G082203	-1.1	-2.1				hypothetical protein LOC100381433				AT3G62270		HCO3- transporter family		LOC_Os12g37840.1
GRMZM2G061751	-1.3	-2.1				single-stranded DNA binding				AT1G53380		Plant protein of unknown function (DUF641)		LOC_Os01g10680.1
GRMZM2G063931	-1.3	-2.1				ubiquitin-conjugating enzyme E2 I				AT3G57870	AHUS5,ATSCE1,EMB1637,SCE1,SCE1A	sumo conjugation enzyme 1		LOC_Os03g03130.1
GRMZM2G071021	-1.4	-2.1				cytosolic aldehyde dehydrogenase RF2C				AT3G24503	ALDH1A,ALDH2C4,REF1	aldehyde dehydrogenase 2C4		LOC_Os01g40860.1
GRMZM2G089944	-1.5	-2.1				metabolic process				AT4G37560		Acetamidase/Formamidase family protein		LOC_Os01g55950.1
GRMZM2G107886	-1.5	-2.1				zinc finger protein CONSTANS-LIKE 16		C2C2-CO-like		AT1G25440		B-box type zinc finger protein with CCT domain		LOC_Os06g15330.1
GRMZM2G018375	-1.5	-2.1				thiamin biosynthetic process				AT5G54770	THI1,THI4,TZ	thiazole biosynthetic enzyme, chloroplast (ARA6) (THI1) (THI4)		LOC_Os07g34570.1
GRMZM2G101270	-1.7	-2.1				nucleotide binding				AT4G18820		AAA-type ATPase family protein		LOC_Os05g45340.1
GRMZM5G822440	-1.7	-2.1				hypothetical protein LOC100274194				AT1G61350		ARM repeat superfamily protein		LOC_Os07g37350.1
GRMZM2G119273	-1.8	-2.1				Transcribed locus				AT3G53850		Uncharacterised protein family (UPF0497)		LOC_Os01g62850.1
GRMZM2G435049	-1.9	-2.1				hypothetical protein LOC100277469								LOC_Os03g30060.1
GRMZM5G898371	-1.9	-2.1				hypothetical protein LOC100277593								LOC_Os07g14910.1
GRMZM2G160917	-2.2	-2.1				DNA binding				AT2G42200	SPL9	squamosa promoter binding protein-like 9		LOC_Os08g39890.1
GRMZM2G119823	-3	-2.1				nucleus		bHLH		AT5G57150		basic helix-loop-helix (bHLH) DNA-binding superfamily protein		LOC_Os04g23550.1
GRMZM2G055827	-3.9	-2.1				protein binding				AT3G16720	ATL2,TL2	TOXICOS EN LEVADURA 2		LOC_Os03g22080.1
GRMZM2G123308		-2.1				Clone 366550 mRNA sequence		G2-like						LOC_Os08g06370.1
GRMZM2G014043		-2.1				hypothetical protein LOC100274826				AT2G43990				LOC_Os11g14240.1
GRMZM2G105801		-2.1				hypothetical protein LOC100274858				AT4G00525				LOC_Os04g47130.1
GRMZM2G142620		-2.1				hypothetical protein LOC100191718				AT3G20350				LOC_Os08g09170.1
GRMZM2G147221		-2.1				cellulase containing protein								LOC_Os05g15510.1
GRMZM2G150408		-2.1				hypothetical protein LOC100277070				AT1G04030				LOC_Os03g04550.1
GRMZM2G435986		-2.1				Transcribed locus, moderately similar to XP_002463344.1 hypothetical protein SORBIDRAFT_02g042110 [Sorghum bicolor]								LOC_Os07g46800.1
GRMZM2G465728		-2.1				cytoskeleton				AT1G11320				LOC_Os10g30210.1
GRMZM5G893921		-2.1				C-Myc-binding protein				AT2G14045				LOC_Os07g08820.1
GRMZM5G879749		-2.1				serine-type carboxypeptidase activity				AT4G30610	BRS1,SCPL24	alpha/beta-Hydrolases superfamily protein		LOC_Os02g55130.1
GRMZM2G125943		-2.1				histidine kinase		Orphans		AT2G01830	AHK4,ATCRE1,CRE1,WOL,WOL1	CHASE domain containing histidine kinase protein		LOC_Os02g50480.1
GRMZM2G093246		-2.1				protein kinase activity				AT4G02410		Concanavalin A-like lectin protein kinase family protein		LOC_Os03g60810.1
GRMZM2G153240		-2.1								AT1G68390		Core-2/I-branching beta-1,6-N-acetylglucosaminyltransferase family protein		LOC_Os01g04220.1
GRMZM2G112836		-2.1								AT2G28150		Domain of unknown function (DUF966)		LOC_Os01g62200.2
GRMZM2G325513		-2.1				dehydration-responsive element-binding protein 1B				AT2G35700	ATERF38,ERF38	ERF family protein 38		LOC_Os04g46400.1
GRMZM2G036340		-2.1				iron ion binding				AT1G15550	ATGA3OX1,GA3OX1,GA4	gibberellin 3-oxidase 1		LOC_Os01g08220.1
GRMZM2G108032		-2.1				hypothetical protein LOC100272986				AT4G38650		Glycosyl hydrolase family 10 protein		LOC_Os03g14010.2
GRMZM2G045981		-2.1				protein kinase activity				AT5G51560		Leucine-rich repeat protein kinase family protein		LOC_Os08g02440.1
GRMZM2G125081		-2.1				hypothetical protein LOC100304214				AT2G45340		Leucine-rich repeat protein kinase family protein		LOC_Os08g02440.1
GRMZM2G421565		-2.1				Golgi membrane				AT1G31470	NFD4	Major facilitator superfamily protein		LOC_Os11g01590.1
GRMZM2G359929		-2.1				Transcribed locus, moderately similar to XP_002463982.1 hypothetical protein SORBIDRAFT_01g009980 [Sorghum bicolor]				AT2G01910	ATMAP65-6,MAP65-6	Microtubule associated protein (MAP65/ASE1) family protein		LOC_Os03g13460.1
AC233865.1_FG003		-2.1								AT3G17730.1	anac057,NAC057	NAC domain containing protein 57		LOC_Os09g38000.1
GRMZM2G147491		-2.1				hypothetical protein LOC100193561				AT4G35160		O-methyltransferase family protein		LOC_Os11g20090.1
GRMZM2G394500		-2.1				hypothetical protein LOC100191318				AT4G33420		Peroxidase superfamily protein		LOC_Os05g04380.1
GRMZM2G095254		-2.1				hypothetical protein LOC100278733				AT4G25835		P-loop containing nucleoside triphosphate hydrolases superfamily protein		LOC_Os09g27340.1
GRMZM2G324767		-2.1				hypothetical protein LOC100278392				AT3G22070		proline-rich family protein		LOC_Os04g53730.1
GRMZM2G062504		-2.1				Hypothetical protein LOC100276123				AT3G52770	ZPR3	protein binding		LOC_Os04g33560.1
GRMZM2G163328		-2.1				senescence-induced receptor-like serine/threonine-protein kinase				AT1G33260		Protein kinase superfamily protein		LOC_Os02g01730.1
GRMZM2G127648		-2.1				ras-related protein RIC2				AT1G16920	ATRABA1B,RAB11,RABA1b	RAB GTPase homolog A1B		LOC_Os05g44070.1
GRMZM2G012413		-2.1				hypothetical protein LOC100191296				AT4G35730		Regulator of Vps4 activity in the MVB pathway protein		LOC_Os09g37510.1
GRMZM2G387076		-2.1				VAMP-like protein YKT62				AT5G58060	ATGP1,ATYKT61,YKT61	SNARE-like superfamily protein		LOC_Os01g64650.1
GRMZM2G301585		-2.1				protein binding				AT3G16720	ATL2,TL2	TOXICOS EN LEVADURA 2		LOC_Os02g45390.1
GRMZM2G009232	-2.5	-2	-3.16561	-4.6		monooxygenase activity				AT5G57220	CYP81F2	cytochrome P450, family 81, subfamily F, polypeptide 2		LOC_Os02g30090.1
GRMZM2G044104	-2.4	-2		-3.1		Clone 373515 mRNA sequence				AT5G42510		Disease resistance-responsive (dirigent-like protein) family protein		LOC_Os11g10800.1
GRMZM2G102681	-2.2	-2	-2.7469	-2.7						AT2G33190		F-box family protein with a domain of unknown function (DUF295)		LOC_Os02g45000.1
GRMZM2G082032	-2.4	-2		-2.6		hydrolase activity				AT3G16150		N-terminal nucleophile aminohydrolases (Ntn hydrolases) superfamily protein		LOC_Os04g46370.2
GRMZM2G151227	-3.3	-2	-3.2194	-2.4		chalcone synthase				AT5G13930	ATCHS,CHS,TT4	Chalcone and stilbene synthase family protein		LOC_Os11g32650.1
GRMZM2G068715	-1.5	-2	-1.93982	-2.2		ribonucleoprotein A				AT3G53460	CP29	chloroplast RNA-binding protein 29		LOC_Os07g43810.1
GRMZM2G060842	-2	-2	-2.2652	-2.1		LOC100194276				AT5G22340				LOC_Os03g20640.1
GRMZM2G127780	-3	-2	-4.03625	-2.1						AT1G79270	ECT8	evolutionarily conserved C-terminal region 8		LOC_Os01g48790.1
GRMZM2G083472	-1.8	-2	-2.22337	-2		Transcribed locus, moderately similar to XP_002437549.1 hypothetical protein SORBIDRAFT_10g029200 [Sorghum bicolor]				AT3G13040		myb-like HTH transcriptional regulator family protein		LOC_Os06g49040.1
GRMZM5G839640	-2.6	-2		-2		verprolin								LOC_Os03g56930.1
GRMZM2G062885	-1.1	-2	-1.89518	-1.9		Transcribed locus, moderately similar to XP_002451540.1 hypothetical protein SORBIDRAFT_04g003470 [Sorghum bicolor]		Orphans		AT5G57180	CIA2	chloroplast import apparatus 2		LOC_Os02g05470.1
GRMZM2G179024	-2.2	-2	-3.01102	-1.9		hypothetical protein LOC100273598		Pseudo ARR-B		AT5G24470	APRR5,PRR5	pseudo-response regulator 5		LOC_Os09g36220.1
GRMZM2G020254	-2.1	-2		-1.9		transcription factor activity				AT2G37260	ATWRKY44,DSL1,TTG2,WRKY44	WRKY family transcription factor family protein		LOC_Os12g01180.1
GRMZM2G142413	-2.3	-2	-3.5213	-1.8		Transcribed locus				AT3G16000	MFP1	MAR binding filament-like protein 1		LOC_Os01g08510.1
GRMZM2G417750		-2	-2.65658	-1.7
GRMZM2G090105	-2.1	-2	-1.25074			phosphatidylinositol N-acetylglucosaminyltransferase subunit P (LOC100284509), mRNA				AT2G39445		Phosphatidylinositol N-acetylglucosaminyltransferase, GPI19/PIG-P subunit		LOC_Os03g43900.1
GRMZM2G074792	-1.5	-2	-1.28107			Full-length cDNA clone ZM_BFb0226I01				AT4G07960	ATCSLC12,CSLC12	Cellulose-synthase-like C12		LOC_Os05g43530.1
GRMZM2G174784		-2	-1.28332			hypothetical protein LOC100280414		AP2-EREBP		AT4G36920	AP2,FL1,FLO2	Integrase-type DNA-binding superfamily protein		LOC_Os04g55560.3
GRMZM2G096904	-1.6	-2	-1.34468			Clone 1616704 mRNA sequence				AT3G11760				LOC_Os01g09770.1
GRMZM2G372074		-2	-1.34884			hypothetical protein LOC100273286				AT3G22142		Bifunctional inhibitor/lipid-transfer protein/seed storage 2S albumin superfamily protein		LOC_Os06g07220.1
GRMZM2G031354	-2	-2	-1.35711			36.4 kDa proline-rich protein				AT3G22142		Bifunctional inhibitor/lipid-transfer protein/seed storage 2S albumin superfamily protein		LOC_Os04g52260.1
GRMZM2G075775		-2	-1.36141			LOC100276332				AT1G02180		ferredoxin-related		LOC_Os08g35710.1
GRMZM2G030252		-2	-1.40279			hypothetical protein LOC100193350				AT3G30340		nodulin MtN21 /EamA-like transporter family protein		LOC_Os06g01966.1
GRMZM2G049693		-2	-1.43226			hypothetical protein LOC100383470				AT4G12420	SKU5	Cupredoxin superfamily protein		LOC_Os06g01490.1
GRMZM2G413006		-2	-1.43597			LOC100283129				AT5G57560	TCH4,XTH22	Xyloglucan endotransglucosylase/hydrolase family protein		LOC_Os06g48160.1
GRMZM2G366301	-1.2	-2	-1.44186											LOC_Os06g11760.1
GRMZM2G121514	-1.1	-2	-1.46447			hydrolase activity, hydrolyzing O-glycosyl compounds				AT1G65590	ATHEX1,HEXO3	beta-hexosaminidase 3		LOC_Os05g34320.1
GRMZM2G152908		-2	-1.47394			sucrose synthase1				AT3G43190	ATSUS4,SUS4	sucrose synthase 4		LOC_Os03g28330.1
GRMZM2G122357		-2	-1.53877			LOC100279096				AT3G12960				LOC_Os08g01370.1
GRMZM2G370915		-2	-1.56469			integral to membrane				AT3G13772	AtTMN7,TMN7	transmembrane nine 7		LOC_Os09g38530.1
GRMZM2G080767		-2	-1.60512			ion channel activity				AT4G03560	ATCCH1,ATTPC1,FOU2,TPC1	two-pore channel 1		LOC_Os01g48680.1
GRMZM2G122277	-1.3	-2	-1.64569			hypothetical protein LOC100382337				AT5G16910	ATCSLD2,CSLD2	cellulose-synthase like D2		LOC_Os08g06380.1
AC230013.2_FG002		-2	-1.68098							AT2G34060.1		Peroxidase superfamily protein		LOC_Os08g42030.1
GRMZM2G335019	-1.5	-2	-1.69073			LOC100279036				AT5G51960				LOC_Os11g03920.1
GRMZM2G017557		-2	-1.70118			Zea root preferential4				AT4G35150		O-methyltransferase family protein		LOC_Os05g43930.1
GRMZM2G092018	-1.2	-2	-1.76383			hypothetical protein LOC100194310				AT2G01220		Nucleotidylyl transferase superfamily protein		LOC_Os01g49670.1
GRMZM2G469898		-2	-1.76724			esterase				AT5G45910		GDSL-like Lipase/Acylhydrolase superfamily protein		LOC_Os06g34120.1
GRMZM2G068330	-1.3	-2	-1.77302			DNA binding		zf-HD		AT2G02540	ATHB21,HB21,ZFHD4	homeobox protein 21		LOC_Os11g13930.1
GRMZM2G565940	-1.3	-2	-1.77434
GRMZM2G156310		-2	-1.79649			hypothetical protein LOC100273481				AT1G47480		alpha/beta-Hydrolases superfamily protein		LOC_Os09g28720.1
GRMZM2G008507	-2.4	-2	-1.79721			sucrose metabolic process				AT4G10120	ATSPS4F	Sucrose-phosphate synthase family protein		LOC_Os11g12810.1
GRMZM5G837018	-1.4	-2	-1.79765			hypothetical protein LOC100272304				AT3G49650		P-loop containing nucleoside triphosphate hydrolases superfamily protein		LOC_Os03g56260.1
GRMZM2G126920	-2	-2	-1.80721			hypothetical protein LOC100384433				AT5G38590		F-box/RNI-like/FBD-like domains-containing protein		LOC_Os06g47100.1
GRMZM2G089351	-1.3	-2	-1.84427			hypothetical protein LOC100272566				AT3G16060		ATP binding microtubule motor family protein		LOC_Os01g43580.1
GRMZM2G105364	-1	-2	-1.85346			GAST1 protein				AT5G15230	GASA4	GAST1 protein homolog 4		LOC_Os06g15620.1
GRMZM2G410352		-2	-1.85883			TSA: Zea mays contig41320, mRNA sequence								LOC_Os05g46470.1
GRMZM2G315848	-1.6	-2	-1.88935			nucleotide pyrophosphatase/phosphodiesterase				AT5G50400	ATPAP27,PAP27	purple acid phosphatase 27		LOC_Os12g38750.1
GRMZM5G826714		-2	-1.89367			brittle stalk-2-like protein 3				AT5G60920	COB	COBRA-like extracellular glycosyl-phosphatidyl inositol-anchored protein family		LOC_Os05g32110.1
AC198752.4_FG004		-2	-1.93314											LOC_Os02g33780.1
GRMZM2G142664	-1.9	-2	-1.94205			auxin-independent growth promoter				AT1G20550		O-fucosyltransferase family protein		LOC_Os04g47520.1
GRMZM2G137574		-2	-1.95309			homoiothermy				AT3G19180	ARC6H,ATCDP1,CDP1,PARC6	paralog of ARC6		LOC_Os04g57920.1
GRMZM5G872442		-2	-2.01636			DNA binding
GRMZM2G172506	-1.5	-2	-2.04678			signal transducer activity				AT2G14820	NPY2	Phototropic-responsive NPH3 family protein		LOC_Os12g39380.1
GRMZM2G121826		-2	-2.09876			hypothetical protein LOC100192584				AT5G59010		Protein kinase protein with tetratricopeptide repeat domain		LOC_Os03g61010.1
GRMZM2G432738	-1.7	-2	-2.10627			hypothetical protein LOC100194215				AT1G69420		DHHC-type zinc finger family protein		LOC_Os03g11110.1
GRMZM2G078274	-1.4	-2	-2.13208			hypothetical protein LOC100382863		ARF		AT1G30330	ARF6	auxin response factor 6		LOC_Os04g57610.3
GRMZM2G081790	-1.5	-2	-2.16838			DNA binding				AT1G79480		Carbohydrate-binding X8 domain superfamily protein		LOC_Os06g45450.1
GRMZM2G113506	-1.3	-2	-2.20946			hypothetical protein LOC100384251				AT5G15470	GAUT14	galacturonosyltransferase 14		LOC_Os03g11330.1
GRMZM2G128057	-2.2	-2	-2.22911			TSA: Zea mays contig31764, mRNA sequence				AT5G16730		Plant protein of unknown function (DUF827)		LOC_Os04g50204.1
GRMZM2G166695		-2	-2.23454			Hypothetical protein LOC100276118				AT1G45207		Remorin family protein		LOC_Os08g36760.1
GRMZM2G412207	-1.4	-2	-2.28993			Putative uncharacterized protein				AT4G13710		Pectin lyase-like superfamily protein		LOC_Os04g05050.1
GRMZM2G474685		-2	-2.29492			Clone 395601 mRNA sequence				AT1G69970	CLE26	CLAVATA3/ESR-RELATED 26		LOC_Os03g58870.1
GRMZM2G027723	-1.3	-2	-2.40207			cellulose synthase-2				AT4G32410	AtCESA1,CESA1,RSW1	cellulose synthase 1		LOC_Os05g08370.1
GRMZM2G057301	-2.2	-2	-2.47504			hypothetical protein LOC100272593				AT3G57930				LOC_Os06g21580.1
GRMZM2G049915	-1.8	-2	-2.5092			proline-rich protein
GRMZM2G100380	-1.8	-2	-2.55873			Transcribed locus, moderately similar to XP_002463919.1 hypothetical protein SORBIDRAFT_01g008900 [Sorghum bicolor]				AT1G03670		ankyrin repeat family protein		LOC_Os07g09530.1
GRMZM2G461936		-2	-2.64373			nucleic acid binding				AT1G48410	AGO1	Stabilizer of iron transporter SufD / Polynucleotidyl transferase		LOC_Os03g47820.1
GRMZM5G864689	-2.1	-2	-2.89469			microtubule motor activity				AT4G39050		Kinesin motor family protein		LOC_Os02g53520.1
GRMZM2G057031	-2.4	-2	-2.96364			nucleotide binding				AT5G27740	EMB161,EMB251,EMB2775,RFC3	ATPase family associated with various cellular activities (AAA)		LOC_Os02g47605.1
GRMZM2G082823	-1.1	-2	-3.26358			hypothetical protein LOC100273704				AT1G12040	LRX1	leucine-rich repeat/extensin 1		LOC_Os05g08770.1
GRMZM2G029400	-1.9	-2	-3.45602			hypothetical protein LOC100273681				AT5G45910		GDSL-like Lipase/Acylhydrolase superfamily protein		LOC_Os06g06290.1
GRMZM2G385925	-2	-2	-3.56576			DNA binding				AT3G12020		P-loop containing nucleoside triphosphate hydrolases superfamily protein		LOC_Os02g53520.1
GRMZM2G108530	-1.6	-2	-3.86443			binding				AT5G18940		Mo25 family protein		LOC_Os03g24520.1
GRMZM2G074585	-3.2	-2	-5.00425			LOC541905				AT1G20190	ATEXP11,ATEXPA11,ATHEXP ALPHA 1.14,EXP11,EXPA11	expansin 11		LOC_Os03g06000.1
GRMZM2G422671	-1.2	-2				expressed in cucumber hypocotyls				AT5G60630
GRMZM2G115841	-1.2	-2				P-protein				AT2G27820	ADT3,PD1	prephenate dehydratase 1		LOC_Os10g37980.1
GRMZM2G096184	-1.3	-2				hypothetical protein LOC100381508				AT5G37630	EMB2656	ARM repeat superfamily protein		LOC_Os06g14460.1
GRMZM2G053869	-1.5	-2				hypothetical protein LOC100278681				AT3G52240				LOC_Os05g37340.1
GRMZM2G075502	-1.5	-2				nucleosome				AT3G06130		Heavy metal transport/detoxification superfamily protein		LOC_Os03g22490.1
GRMZM2G001956	-1.6	-2				protein folding				AT3G10060		FKBP-like peptidyl-prolyl cis-trans isomerase family protein		LOC_Os07g09040.1
GRMZM5G801627	-1.6	-2				LOC100277562				AT4G29190		Zinc finger C-x8-C-x5-C-x3-H type family protein		LOC_Os05g10670.1
GRMZM2G054509	-1.7	-2				flavonol sulfotransferase-like				AT5G07000	ATST2B,ST2B	sulfotransferase 2B		LOC_Os04g44460.1
GRMZM2G405090	-1.8	-2				hypothetical protein LOC100277341				AT5G03230		Protein of unknown function, DUF584		LOC_Os10g33990.1
GRMZM2G159399	-1.9	-2				DNA binding		ARF		AT4G30080	ARF16	auxin response factor 16		LOC_Os10g33940.1
GRMZM5G862317	-1.9	-2				anther-specific proline-rich protein APG				AT1G75900		GDSL-like Lipase/Acylhydrolase superfamily protein		LOC_Os03g64170.1
GRMZM2G042660	-2.5	-2				hypothetical protein LOC100279491				AT1G31690		Copper amine oxidase family protein		LOC_Os06g23114.1
GRMZM2G141277	-2.5	-2				stem 28 kDa glycoprotein				AT4G25150		HAD superfamily, subfamily IIIB acid phosphatase		LOC_Os06g04790.1
GRMZM2G000254		-2				hypothetical protein LOC100216645								LOC_Os05g25620.1
GRMZM2G007256		-2				adhesive/proline-rich protein				AT2G32190
GRMZM2G078595		-2				hypothetical protein LOC100384374 (LOC100384374), mRNA								LOC_Os03g59210.1
GRMZM2G308873		-2
GRMZM2G355062		-2				Hypothetical protein LOC100277124
GRMZM5G805685		-2				DNA binding				AT5G06250		AP2/B3-like transcriptional factor family protein		LOC_Os12g06080.1
GRMZM2G050286		-2				AGP20				AT2G46330	AGP16,ATAGP16	arabinogalactan protein 16		LOC_Os05g12580.1
GRMZM2G079956		-2				hypothetical protein LOC100384516				AT5G07220	ATBAG3,BAG3	BCL-2-associated athanogene 3		LOC_Os08g43270.1
GRMZM2G062488		-2				acetylglucosaminyltransferase/ transferase, transferring glycosyl groups				AT3G27540		beta-1,4-N-acetylglucosaminyltransferase family protein		LOC_Os04g40150.1
GRMZM2G092442		-2				hypothetical protein LOC100276515				AT2G16760		Calcium-dependent phosphotriesterase superfamily protein		LOC_Os03g19452.1
GRMZM2G342685		-2				caleosin				AT2G33380	CLO-3,RD20	Caleosin-related family protein		LOC_Os03g12230.1
GRMZM2G090266		-2				TSA: Zea mays contig21849, mRNA sequence				AT5G57685	ATGDU3,GDU3,LSB1	glutamine dumper 3		LOC_Os06g44420.1
GRMZM2G140201		-2				LOC100191416				AT2G20680		Glycosyl hydrolase superfamily protein		LOC_Os01g54300.1
GRMZM2G001426		-2				hypothetical protein LOC100384621 (LOC100384621), mRNA		GRAS		AT1G14920	GAI,RGA2	GRAS family transcription factor family protein		LOC_Os01g45860.1
GRMZM2G146225		-2				hypothetical protein LOC100383173				AT1G14900	HMGA	high mobility group A		LOC_Os09g23730.1
GRMZM2G105863		-2				LOC100277220				AT1G17140	ICR1,RIP1	interactor of constitutive active rops 1		LOC_Os01g55280.1
GRMZM2G007948		-2								AT4G05220		Late embryogenesis abundant (LEA) hydroxyproline-rich glycoprotein family		LOC_Os07g34720.1
GRMZM2G045844		-2				Clone 288734 mRNA sequence				AT3G44220		Late embryogenesis abundant (LEA) hydroxyproline-rich glycoprotein family		LOC_Os04g33990.1
GRMZM2G139894		-2				nucleotide binding				AT1G44900	ATMCM2,MCM2	minichromosome maintenance (MCM2/3/5) family protein		LOC_Os11g29380.1
GRMZM2G066101		-2				DNA replication licensing factor mcm4				AT2G16440	MCM4	Minichromosome maintenance (MCM2/3/5) family protein		LOC_Os01g36390.1
GRMZM2G001079		-2				galactosylgalactosylxylosylprotein 3-beta-glucuronosyltransferase activity				AT2G37090	IRX9	Nucleotide-diphospho-sugar transferases superfamily protein		LOC_Os03g17850.1
GRMZM2G065480		-2				hypothetical protein LOC100273823				AT3G10350		P-loop containing nucleoside triphosphate hydrolases superfamily protein		LOC_Os02g51100.1
GRMZM2G067342		-2				cell redox homeostasis				AT4G31240		protein kinase C-like zinc finger protein		LOC_Os04g51920.1
GRMZM2G168917		-2				protein kinase activity				AT1G33260		Protein kinase superfamily protein		LOC_Os04g45730.1
GRMZM2G071599		-2				LOC100280278				AT3G51290		Protein of unknown function (DUF630) ;Protein of unknown function (DUF632)		LOC_Os09g36760.1
GRMZM2G093210		-2				lectin-like receptor kinase 7				AT2G37710	RLK	receptor lectin kinase		LOC_Os03g60810.1
GRMZM2G005236		-2				nucleic acid binding				AT1G33470		RNA-binding (RRM/RBD/RNP motifs) family protein		LOC_Os01g65550.2
GRMZM2G361993		-2				hypothetical protein LOC100383036 (LOC100383036), mRNA				AT2G46690		SAUR-like auxin-responsive protein family		LOC_Os06g50040.1
GRMZM2G402584		-2				copper ion binding				AT5G48450	sks3	SKU5 similar 3		LOC_Os01g01030.1
GRMZM2G176131		-2				structural molecule activity				AT1G20010	TUB5	tubulin beta-5 chain		LOC_Os02g07060.1
GRMZM2G074395		-2				cytokinin-O-glucosyltransferase 1				AT2G15480	UGT73B5	UDP-glucosyl transferase 73B5		LOC_Os03g59350.1
GRMZM2G105348	-2.4	-1.9	-2.84525	-3.4		heat shock factor protein 1		HSF		AT3G24520	AT-HSFC1,HSFC1	heat shock transcription factor C1		LOC_Os02g13800.1
GRMZM2G181546	-3.1	-1.9	-2.51447	-3.1		Hypothetical protein LOC100382241
GRMZM2G122187	-2.9	-1.9	-1.8525	-3		phospholipid binding				AT1G33340		ENTH/ANTH/VHS superfamily protein		LOC_Os11g14000.1
GRMZM2G053315	-1.9	-1.9	-2.17151	-2.9		LOC100285270				AT1G19250	FMO1	flavin-dependent monooxygenase 1		LOC_Os09g37620.1
GRMZM2G074401	-1.7	-1.9	-2.07248	-2.6		lipid metabolic process				AT5G05580	FAD8	fatty acid desaturase 8		LOC_Os03g18070.1
GRMZM2G137046	-2.2	-1.9	-2.60722	-2.6		transcription factor HY5		bZIP		AT5G11260	HY5,TED 5	Basic-leucine zipper (bZIP) transcription factor family protein		LOC_Os02g10860.1
GRMZM2G143917	-1.8	-1.9	-2.15708	-2.5		hypothetical protein LOC100192036				AT4G35250		NAD(P)-binding Rossmann-fold superfamily protein		LOC_Os08g44000.1
GRMZM2G020429	-2.1	-1.9	-2.66539	-2.5		DNA binding				AT3G27190	UKL2	uridine kinase-like 2		LOC_Os09g32820.1
GRMZM2G070605	-1.9	-1.9	-1.78569	-2.4		LOC542473				AT5G46110	APE2,TPT	Glucose-6-phosphate/phosphate translocator-related		LOC_Os01g13770.1
GRMZM2G085577	-1.7	-1.9	-2.12331	-2.4		LOC100285259				AT3G46970	ATPHS2,PHS2	alpha-glucan phosphorylase 2		LOC_Os01g63270.1
GRMZM2G066636	-2.2	-1.9	-3.70479	-2.4		LOC100284091				AT3G62040		Haloacid dehalogenase-like hydrolase (HAD) superfamily protein		LOC_Os07g44060.1
GRMZM2G364643	-2.6	-1.9		-2.4		hypothetical protein LOC100381856				AT4G15755		Calcium-dependent lipid-binding (CaLB domain) family protein		LOC_Os07g47400.1
GRMZM2G028570	-2.5	-1.9	-1.76652	-2.2		transporter activity				AT3G05150		Major facilitator superfamily protein		LOC_Os05g49270.1
GRMZM2G372632	-3	-1.9	-3.75893	-2.2						AT4G31850	PGR3	proton gradient regulation 3		LOC_Os10g28600.1
GRMZM5G826658	-2.7	-1.9	-2.14352	-2.1		hypothetical protein LOC100382788				AT3G01930		Major facilitator superfamily protein		LOC_Os04g31924.1
GRMZM2G100060		-1.9	-2.52798	-2.1		catalytic activity				AT2G07050	CAS1	cycloartenol synthase 1		LOC_Os11g35710.1
GRMZM2G000620	-1.4	-1.9		-2		receptor-like kinase				AT1G11340		S-locus lectin protein kinase family protein		LOC_Os04g54020.1
GRMZM2G431030	-2.6	-1.9	-1.26553	-1.9		hypothetical protein LOC100277968				AT5G43150				LOC_Os04g51410.1
GRMZM2G131165	-2.3	-1.9	-1.27285	-1.9		anthranilate N-benzoyltransferase protein 1				AT5G48930	HCT	hydroxycinnamoyl-CoA shikimate/quinate hydroxycinnamoyl transferase		LOC_Os09g25460.1
GRMZM2G023289	-2.3	-1.9	-1.77344	-1.8		phosphoglucomutase 2				AT1G70730		Phosphoglucomutase/phosphomannomutase family protein		LOC_Os03g50480.1
GRMZM2G106165	-1.9	-1.9	-1.96751	-1.8		retinoid-inducible serine carboxypeptidase
GRMZM2G106752		-1.9	-2.20551	-1.8		Transcribed locus, moderately similar to XP_002452331.1 hypothetical protein SORBIDRAFT_04g023820 [Sorghum bicolor]				AT5G64550		loricrin-related		LOC_Os02g36590.1
GRMZM2G027955	-1.7	-1.9		-1.8		glycogen biosynthetic process				AT1G27680	APL2	ADPGLC-PPase large subunit		LOC_Os05g50380.1
GRMZM2G038494	-1.9	-1.9	-3.14221	-1.6		LOC100274056				AT1G56050		GTP-binding protein-related		LOC_Os03g56840.1
GRMZM2G046316		-1.9	-1.90588	1.8		protein kinase activity				AT5G45800	MEE62	Leucine-rich repeat protein kinase family protein		LOC_Os06g35200.1
GRMZM2G145412		-1.9		7.1		LOC100284894		Tify		AT3G43440	JAZ11,TIFY3A	jasmonate-zim-domain protein 11		LOC_Os10g25230.1
GRMZM2G111926	-1.1	-1.9	-1.23475			membrane				AT4G15920		Nodulin MtN3 family protein		LOC_Os03g22200.1
GRMZM2G068714	-1.2	-1.9	-1.24752			pilus				AT2G28315		Nucleotide/sugar transporter family protein		LOC_Os02g41780.1
GRMZM2G017678		-1.9	-1.24788			catalytic activity				AT1G02000	GAE2	UDP-D-glucuronate 4-epimerase 2		LOC_Os03g14540.1
GRMZM2G130800		-1.9	-1.28449			hypothetical protein LOC100278409				AT3G18180		Glycosyltransferase family 61 protein		LOC_Os01g02940.1
GRMZM2G029863		-1.9	-1.29671			protein binding protein				AT5G07220	ATBAG3,BAG3	BCL-2-associated athanogene 3		LOC_Os06g03640.1
GRMZM2G024099		-1.9	-1.29937			hypothetical protein LOC100192462				AT1G09750		Eukaryotic aspartyl protease family protein		LOC_Os03g08790.1
AC234156.1_FG005		-1.9	-1.32414							AT2G04780.1	FLA7	FASCICLIN-like arabinoogalactan 7		LOC_Os09g30486.1
GRMZM2G103270		-1.9	-1.35906			protein binding				AT2G28840	XBAT31	XB3 ortholog 1 in Arabidopsis thaliana		LOC_Os03g16780.1
GRMZM2G117707		-1.9	-1.38336			3-deoxy-7-phosphoheptulonate synthase activity				AT4G33510	DHS2	3-deoxy-d-arabino-heptulosonate 7-phosphate synthase		LOC_Os07g42960.1
GRMZM2G404132		-1.9	-1.40023			protein kinase activity				AT3G52890	KIPK	KCBP-interacting protein kinase		LOC_Os12g29580.1
GRMZM2G059117	-1.7	-1.9	-1.40728			protein kinase activity				AT3G28040		Leucine-rich receptor-like protein kinase family protein		LOC_Os01g72700.1
GRMZM2G371137		-1.9	-1.44284			protein kinase activity				AT1G12460		Leucine-rich repeat protein kinase family protein		LOC_Os03g03570.2
GRMZM2G140342		-1.9	-1.45966			LOC100191444				AT1G72480		Lung seven transmembrane receptor family protein		LOC_Os09g26830.1
GRMZM2G136106		-1.9	-1.46592			hypothetical protein LOC100280285				AT1G53830	ATPME2,PME2	pectin methylesterase 2		LOC_Os01g21034.1
GRMZM2G076348	-1.8	-1.9	-1.47499			hydrolase activity				AT3G23570		alpha/beta-Hydrolases superfamily protein		LOC_Os05g33200.1
GRMZM2G325907	-1	-1.9	-1.47586			myb-like DNA-binding domain containing protein				AT1G63910	AtMYB103,MYB103	myb domain protein 103		LOC_Os08g05520.1
GRMZM2G035278		-1.9	-1.49095			hypothetical protein LOC100273389				AT2G25770		Polyketide cyclase/dehydrase and lipid transport superfamily protein		LOC_Os01g10210.1
GRMZM2G110922	-1.1	-1.9	-1.51503			protein kinase activity				AT1G10940	ASK1,SNRK2-4,SNRK2.4,SRK2A	Protein kinase superfamily protein		LOC_Os01g64970.1
GRMZM2G022897	-1.1	-1.9	-1.56934			hypothetical protein LOC100279241				AT1G25570		Di-glucose binding protein with Leucine-rich repeat domain		LOC_Os01g04720.1
GRMZM2G137930		-1.9	-1.59185			hypothetical protein LOC100216827				AT3G53620	AtPPa4,PPa4	pyrophosphorylase 4		LOC_Os05g02310.1
GRMZM2G064547	-1.2	-1.9	-1.61808			LOC100274048				AT4G21310		Protein of unknown function (DUF1218)		LOC_Os07g36110.2
AC209664.3_FG002		-1.9	-1.6408							AT3G25140.1	GAUT8,QUA1	Nucleotide-diphospho-sugar transferases superfamily protein		LOC_Os06g12280.1
GRMZM2G059308	-1.3	-1.9	-1.67529			hypothetical protein LOC100274015				AT5G25900	ATKO1,CYP701A3,GA3	GA requiring 3		LOC_Os06g37364.2
GRMZM2G164696		-1.9	-1.69149			hypothetical protein LOC100273658				AT5G23860	TUB8	tubulin beta 8		LOC_Os03g01530.1
GRMZM2G065423		-1.9	-1.69421			Rho guanyl-nucleotide exchange factor activity				AT5G02010	ATROPGEF7,ROPGEF7	RHO guanyl-nucleotide exchange factor 7		LOC_Os01g62990.1
GRMZM2G158043		-1.9	-1.69749			catalytic activity				AT5G04360	ATLDA,ATPU1,LDA,PU1	limit dextrinase		LOC_Os08g40930.1
GRMZM2G378852	-1.7	-1.9	-1.6995			protein kinase activity				AT2G30040	MAPKKK14	mitogen-activated protein kinase kinase kinase 14		LOC_Os03g18170.1
GRMZM2G023715		-1.9	-1.74773			hypothetical protein LOC100382229				AT1G79620		Leucine-rich repeat protein kinase family protein		LOC_Os03g21230.1
GRMZM2G061280		-1.9	-1.75723			GTP binding				AT5G65270	AtRABA4a,RABA4a	RAB GTPase homolog A4A		LOC_Os10g23100.1
GRMZM2G163189		-1.9	-1.76457			hypothetical protein LOC100381684				AT3G60320		Protein of unknown function (DUF630 and DUF632)		LOC_Os10g41310.1
GRMZM2G150450	-1.5	-1.9	-1.78702			metal ion binding protein				AT3G24450		Heavy metal transport/detoxification superfamily protein		LOC_Os01g52160.1
GRMZM2G090728	-1.2	-1.9	-1.82785			TSA: Zea mays contig03456, mRNA sequence				AT2G38320	TBL34	TRICHOME BIREFRINGENCE-LIKE 34		LOC_Os11g01570.1
GRMZM2G147420		-1.9	-1.86612			Transcribed locus, weakly similar to XP_002450198.1 hypothetical protein SORBIDRAFT_05g001850 [Sorghum bicolor]				AT5G17910				LOC_Os12g03410.1
GRMZM2G128426	-1.4	-1.9	-1.92162			Clone 400970 mRNA sequence				AT1G77580		Plant protein of unknown function (DUF869)		LOC_Os11g06910.1
GRMZM2G057023	-1.7	-1.9	-1.9217			hypothetical protein LOC100272784				AT1G27760	ATSAT32,SAT32	interferon-related developmental regulator family protein / IFRD protein family		LOC_Os07g39900.1
GRMZM2G092107	-1.4	-1.9	-1.93154			hypothetical protein LOC100276827				AT4G39860				LOC_Os04g38310.1
GRMZM2G132704	-1.2	-1.9	-1.97526			hypothetical protein LOC100382159				AT2G42320		nucleolar protein gar2-related		LOC_Os08g39490.1
GRMZM2G096269		-1.9	-1.993			glutathione S-transferase12				AT2G47730	ATGSTF5,ATGSTF8,GST6,GSTF8	glutathione S-transferase phi 8		LOC_Os03g04240.1
GRMZM2G112336		-1.9	-2.03177			cellulose synthase-1				AT4G32410	AtCESA1,CESA1,RSW1	cellulose synthase 1		LOC_Os05g08370.1
GRMZM2G136712	-1.5	-1.9	-2.05707			LOC100280067				AT1G31230	AK-HSDH,AK-HSDH I	aspartate kinase-homoserine dehydrogenase i		LOC_Os08g25390.1
GRMZM2G149317	-1.5	-1.9	-2.06638			phytoene synthase2				AT5G17230	PSY	PHYTOENE SYNTHASE		LOC_Os12g43130.1
GRMZM2G177631		-1.9	-2.08242			cellulose synthase8				AT5G64740	CESA6,E112,IXR2,PRC1	cellulose synthase 6		LOC_Os07g14850.1
GRMZM2G147819	-2	-1.9	-2.08783			nucleotide binding				AT3G10420		P-loop containing nucleoside triphosphate hydrolases superfamily protein		LOC_Os07g08970.1
GRMZM2G059134	-1.2	-1.9	-2.14684			hypothetical protein LOC100275821				AT3G55240		Plant protein 1589 of unknown function		LOC_Os05g38680.1
GRMZM2G044004	-2.3	-1.9	-2.1658			nucleic acid binding		C3H		AT3G51950		Zinc finger (CCCH-type) family protein / RNA recognition motif (RRM)-containing protein		LOC_Os03g21140.1
GRMZM2G174598	-1.2	-1.9	-2.17626			hypothetical protein LOC100384246				AT4G23820		Pectin lyase-like superfamily protein		LOC_Os02g15690.1
GRMZM2G082940		-1.9	-2.18293			blue copper protein				AT2G32300	UCC1	uclacyanin 1		LOC_Os02g43660.1
GRMZM2G021482		-1.9	-2.19066			lipid metabolic process				AT4G26690	GPDL2,MRH5,SHV3	PLC-like phosphodiesterase family protein		LOC_Os04g39610.2
GRMZM2G077769	-1.5	-1.9	-2.20146			copper ion binding				AT1G64640	AtENODL8,ENODL8	early nodulin-like protein 8		LOC_Os03g02400.1
AC204502.4_FG006	-1.7	-1.9	-2.25382							AT5G58360.1	ATOFP3,OFP3	ovate family protein 3		LOC_Os01g60810.1
GRMZM2G097884		-1.9	-2.25858			DNA binding
GRMZM2G141214		-1.9	-2.26971			oxidoreductase activity, acting on CH-OH group of donors				AT1G72970	EDA17,HTH	Glucose-methanol-choline (GMC) oxidoreductase family protein		LOC_Os08g31030.1
GRMZM2G160327	-2.1	-1.9	-2.36817			hypothetical protein LOC100384634				AT5G42180		Peroxidase superfamily protein		LOC_Os02g58720.1
GRMZM2G061851		-1.9	-2.39633			catalytic activity				AT3G53260	ATPAL2,PAL2	phenylalanine ammonia-lyase 2		LOC_Os02g41650.1
GRMZM2G075255	-2.3	-1.9	-2.45436			iron ion binding				AT1G02205	CER1	Fatty acid hydroxylase superfamily		LOC_Os02g40784.1
GRMZM2G164072	-1.4	-1.9	-2.46462			sugar binding				AT1G26810	GALT1	galactosyltransferase1		LOC_Os06g12390.1
GRMZM2G149265	-1.6	-1.9	-2.69079			hypothetical protein LOC100274471				AT2G39770	CYT1,EMB101,GMP1,SOZ1,VTC1	Glucose-1-phosphate adenylyltransferase family protein		LOC_Os08g13930.1
GRMZM2G354053	-2	-1.9	-3.04315			Transcribed locus, strongly similar to NP_001168372.1 hypothetical protein LOC100382140 [Zea mays]				AT5G16730		Plant protein of unknown function (DUF827)		LOC_Os04g50204.1
GRMZM2G316807		-1.9	-3.10253			Transcribed locus, moderately similar to XP_002440348.1 hypothetical protein SORBIDRAFT_09g030070 [Sorghum bicolor]				AT3G61670		Protein of unknown function (DUF3133)		LOC_Os05g50910.1
GRMZM2G168304		-1.9	-3.15597			hypothetical protein LOC100382314				AT1G68530	CER6,CUT1,G2,KCS6,POP1	3-ketoacyl-CoA synthase 6		LOC_Os06g14810.1
GRMZM2G350841	-1.1	-1.9	-3.41136							AT1G59780		NB-ARC domain-containing disease resistance protein		LOC_Os11g38580.1
GRMZM2G039934	-1.5	-1.9	-3.7233			hypothetical protein LOC100383417				AT5G61480	PXY	Leucine-rich repeat protein kinase family protein		LOC_Os08g05290.1
GRMZM2G381267	-1	-1.9				hypothetical protein LOC100277155				AT4G39860				LOC_Os04g38310.1
GRMZM2G064202	-1	-1.9				LOC100285163				AT5G24318		O-Glycosyl hydrolases family 17 protein		LOC_Os11g47820.1
AC235540.1_FG002	-1.1	-1.9								AT1G67510.1		Leucine-rich repeat protein kinase family protein		LOC_Os12g13300.1
GRMZM2G097404	-1.4	-1.9				hypothetical protein LOC100273950				AT4G25190		Family of unknown function (DUF566)		LOC_Os10g40620.1
GRMZM2G090441	-1.4	-1.9				hypothetical protein LOC100383770				AT4G19810		Glycosyl hydrolase family protein with chitinase insertion domain		LOC_Os04g30770.1
GRMZM2G149556	-1.5	-1.9				TSA: Zea mays cultivar W22 CL27Contig1.betc, mRNA sequence				AT3G03150				LOC_Os04g50970.1
GRMZM2G113794	-1.5	-1.9				hypothetical protein LOC100192877				AT3G21750	UGT71B1	UDP-glucosyl transferase 71B1		LOC_Os07g32620.1
GRMZM2G125487	-1.6	-1.9				hypothetical protein LOC100277924								LOC_Os07g33650.1
GRMZM2G375197	-1.6	-1.9				Clone 233297 mRNA sequence								LOC_Os01g02139.1
GRMZM2G022213	-1.6	-1.9				hypothetical protein LOC100383144		C2H2		AT5G66730		C2H2-like zinc finger protein		LOC_Os03g10140.1
GRMZM2G074015	-1.6	-1.9				LOC100279817				AT5G27450	MK,MVK	mevalonate kinase		LOC_Os10g18220.1
GRMZM2G018849	-1.6	-1.9								AT3G27230		S-adenosyl-L-methionine-dependent methyltransferases superfamily protein		LOC_Os06g04680.1
GRMZM2G104918	-1.8	-1.9				soluble inorganic pyrophosphatase				AT2G46860	AtPPa3,PPa3	pyrophosphorylase 3		LOC_Os04g59040.1
GRMZM2G381357	-1.9	-1.9				Hypothetical protein LOC100277097
GRMZM2G033230	-2	-1.9				transcription factor activity		bZIP		AT4G35040	bZIP19	Basic-leucine zipper (bZIP) transcription factor family protein		LOC_Os05g41540.1
GRMZM2G063747		-1.9				hypothetical protein LOC100276711				AT1G47410				LOC_Os09g28600.1
GRMZM2G094396		-1.9
GRMZM2G139994		-1.9				hypothetical protein LOC100384489				AT1G78110				LOC_Os09g20420.1
GRMZM5G878322		-1.9				LOC100278853								LOC_Os01g52890.1
GRMZM2G363116		-1.9				metabolic process				AT1G68620		alpha/beta-Hydrolases superfamily protein		LOC_Os05g33940.1
GRMZM2G099967		-1.9				embryogenesis transmembrane protein				AT5G50140		Ankyrin repeat family protein		LOC_Os06g17570.1
GRMZM2G050933		-1.9				CYCD6				AT4G03270	CYCD6;1	Cyclin D6;1		LOC_Os07g37010.1
GRMZM2G396527		-1.9				DNA binding				AT2G46680	ATHB-7,ATHB7,HB-7	homeobox 7		LOC_Os02g43330.1
GRMZM2G056505		-1.9				Full-length cDNA clone ZM_BFc0061E08				AT5G64550		loricrin-related		LOC_Os02g36590.1
GRMZM2G055158		-1.9				odorant 1 protein		MYB		AT1G66230	AtMYB20,MYB20	myb domain protein 20		LOC_Os02g49986.1
GRMZM5G816636		-1.9				6-phosphofructokinase activity				AT4G26270	PFK3	phosphofructokinase 3		LOC_Os06g05860.1
GRMZM2G113554		-1.9				hypothetical protein LOC100383661				AT2G38370		Plant protein of unknown function (DUF827)		LOC_Os05g39840.1
GRMZM5G809265		-1.9				ras-related protein Rab-18				AT5G03530	ATRAB,ATRAB ALPHA,ATRAB18B,ATRABC2A,RABC2A	RAB GTPase homolog C2A		LOC_Os10g31830.1
GRMZM2G176175		-1.9				DNA binding		AP2-EREBP		AT2G28550	RAP2.7,TOE1	related to AP2.7		LOC_Os07g13170.1
GRMZM2G060999		-1.9				protein binding				AT5G45290		RING/U-box superfamily protein		LOC_Os05g32350.1
AC211164.5_FG004		-1.9								AT5G67400.1	RHS19	root hair specific 19		LOC_Os09g32964.1
GRMZM2G346138		-1.9				structural molecule activity				AT2G43200		S-adenosyl-L-methionine-dependent methyltransferases superfamily protein		LOC_Os01g67360.1
GRMZM2G341442		-1.9				integral to membrane				AT3G12090	TET6	tetraspanin6		LOC_Os05g03530.3
GRMZM2G039525		-1.9				hypothetical protein LOC100191567				AT1G70230	TBL27	TRICHOME BIREFRINGENCE-LIKE 27		LOC_Os09g20850.1
GRMZM2G167872		-1.9				bifunctional polymyxin resistance arnA protein				AT1G08200	AXS2	UDP-D-apiose/UDP-D-xylose synthase 2		LOC_Os01g73790.1
GRMZM2G005207	-7.4	-1.8	-1.85127	-4		hypothetical protein LOC100383957		WRKY		AT3G56400	ATWRKY70,WRKY70	WRKY DNA-binding protein 70		LOC_Os09g09630.1
GRMZM2G029219		-1.8	-1.5686	-3		carbohydrate transporter/ sugar porter/ transporter				AT3G43790	ZIFL2	zinc induced facilitator-like 2		LOC_Os01g16260.1
GRMZM2G006363	-1.4	-1.8	-1.62826	-2.8		transcription factor activity								LOC_Os12g34500.1
GRMZM2G380286	-3.8	-1.8	-1.79451	-2.8		oxidoreductase activity				AT4G28570		Long-chain fatty alcohol dehydrogenase family protein		LOC_Os10g33460.1
GRMZM5G821755	-1.8	-1.8	-2.52073	-2.7		hypothetical protein LOC100277167				AT1G14440	AtHB31,HB31	homeobox protein 31		LOC_Os12g10630.1
GRMZM2G007130	-3.1	-1.8		-2.6		cyclin D5,2				AT4G37630	CYCD5;1	cyclin d5;1		LOC_Os03g10650.1
GRMZM2G019363	-2	-1.8	-2.6859	-2.5		Hypothetical protein LOC100272861				AT2G37210		lysine decarboxylase family protein		LOC_Os09g37540.1
GRMZM5G830932	-1.6	-1.8	-2.18213	-2.4		sigma factor protein				AT3G53920	SIG3,SIGC	RNApolymerase sigma-subunit C		LOC_Os05g51150.1
GRMZM2G318635	-2	-1.8	-3.38637	-2.4		Clone 1535161 mRNA sequence				AT4G28080		Tetratricopeptide repeat (TPR)-like superfamily protein		LOC_Os04g55230.1
GRMZM2G179827	-2.1	-1.8	-2.9044	-2.2		hypothetical protein LOC100217235		Orphans		AT1G59940	ARR3	response regulator 3		LOC_Os04g36070.1
GRMZM5G843972	-3.3	-1.8	-4.92464	-2.2		Hypothetical protein LOC100275073
GRMZM2G343972		-1.8	-1.5171	-2.1		hypothetical protein LOC100217033				AT5G60710		Zinc finger (C3HC4-type RING finger) family protein		LOC_Os10g32740.1
GRMZM2G133434		-1.8		-2.1		peroxidase 45				AT4G30170		Peroxidase family protein		LOC_Os06g48020.1
GRMZM2G104357	-2.5	-1.8	-4.15676	-1.9		Transcribed locus, strongly similar to XP_002453423.1 hypothetical protein SORBIDRAFT_04g005790 [Sorghum bicolor]				AT4G32190		Myosin heavy chain-related protein		LOC_Os02g09340.1
GRMZM2G053322	-1.9	-1.8	-1.97246	-1.8		UDP-sulfoquinovose synthase				AT4G33030	SQD1	sulfoquinovosyldiacylglycerol 1		LOC_Os05g32140.1
GRMZM5G897592	-1.5	-1.8	-1.8049	-1.7		hypothetical protein LOC100382419
GRMZM2G468855	1.5	-1.8	1.68738	2.4		hypothetical protein LOC100273052				AT3G61220		NAD(P)-binding Rossmann-fold superfamily protein		LOC_Os04g44950.1
GRMZM2G116966	-1.9	-1.8	2.39602			benzoate carboxyl methyltransferase				AT5G04370	NAMT1	S-adenosyl-L-methionine-dependent methyltransferases superfamily protein		LOC_Os06g13350.1
GRMZM2G063949		-1.8	-1.33838			dTDP-glucose 4,6-dehydratase				AT1G08200	AXS2	UDP-D-apiose/UDP-D-xylose synthase 2		LOC_Os01g73790.1
GRMZM2G047404		-1.8	-1.33998			plastid phosphate/phosphoenolpyruvate translocator1				AT5G33320	ARAPPT,CUE1,PPT	Glucose-6-phosphate/phosphate translocator-related		LOC_Os09g12600.1
GRMZM2G164527		-1.8	-1.35875			ras-related protein Rab11D				AT5G65270	AtRABA4a,RABA4a	RAB GTPase homolog A4A		LOC_Os10g23100.1
GRMZM2G308860		-1.8	-1.35991			nucleotide binding				AT1G17840	ABCG11,ATWBC11,COF1,DSO,WBC11	white-brown complex homolog protein 11		LOC_Os12g22284.1
GRMZM2G048140		-1.8	-1.40792			Clone 995582 mRNA sequence				AT3G19540		Protein of unknown function (DUF620)		LOC_Os12g39160.1
GRMZM2G166767	-1.9	-1.8	-1.41689			RHM1				AT1G78570	ATRHM1,RHM1,ROL1	rhamnose biosynthesis 1		LOC_Os03g17000.2
GRMZM5G886952	-1.2	-1.8	-1.43083			LOC100280440				AT1G31420	FEI1	Leucine-rich repeat protein kinase family protein		LOC_Os03g16010.1
GRMZM2G057283		-1.8	-1.4599			plasma membrane associated protein				AT5G46530		AWPM-19-like family protein		LOC_Os01g50440.1
GRMZM2G132686		-1.8	-1.53095			hypothetical protein LOC100280257				AT3G16060		ATP binding microtubule motor family protein		LOC_Os01g43580.1
GRMZM2G369815		-1.8	-1.53571			lipid metabolic process				AT3G48460		GDSL-like Lipase/Acylhydrolase superfamily protein		LOC_Os03g62740.1
GRMZM2G404676	-1	-1.8	-1.56067			peroxidase activity				AT4G11290		Peroxidase superfamily protein		LOC_Os07g01420.1
GRMZM2G407044		-1.8	-1.5757			acetolactate synthase/ amino acid binding protein				AT2G31810		ACT domain-containing small subunit of acetolactate synthase protein		LOC_Os02g39570.4
GRMZM2G154678	-1.2	-1.8	-1.59625			catalytic activity				AT2G32990	AtGH9B8,GH9B8	glycosyl hydrolase 9B8		LOC_Os02g50490.1
GRMZM2G108416	-1.3	-1.8	-1.63675			aminotransferase, class IV family protein				AT5G27410		D-aminoacid aminotransferase-like PLP-dependent enzymes superfamily protein		LOC_Os03g24460.2
GRMZM2G136803	-2	-1.8	-1.64358			LOC100194185 (pco061836), mRNA				AT2G40840	DPE2	disproportionating enzyme 2		LOC_Os07g46790.1
AC211175.3_FG005		-1.8	-1.6547							AT5G38560.1		Protein kinase superfamily protein		LOC_Os05g01040.1
GRMZM2G034684		-1.8	-1.65874			hypothetical protein LOC100193151								LOC_Os01g42510.1
GRMZM2G104632	-1.2	-1.8	-1.65942			LOC100282981				AT1G79530	GAPCP-1	glyceraldehyde-3-phosphate dehydrogenase of plastid 1		LOC_Os02g07490.1
GRMZM2G149281		-1.8	-1.67912			LOC100193828				AT5G26667	PYR6	P-loop containing nucleoside triphosphate hydrolases superfamily protein		LOC_Os07g43170.2
GRMZM2G135283	-1.6	-1.8	-1.71899			glycine hydroxymethyltransferase activity				AT4G37930	SHM1,SHMT1,STM	serine transhydroxymethyltransferase 1		LOC_Os03g52840.1
GRMZM2G083655	-2	-1.8	-1.72261			Clone 997534 mRNA sequence				AT5G20150	ATSPX1,SPX1	SPX domain gene 1		LOC_Os06g40120.1
GRMZM2G004572	-1.6	-1.8	-1.7271			hypothetical protein LOC100381429				AT1G53730	SRF6	STRUBBELIG-receptor family 6		LOC_Os10g25090.1
GRMZM2G023786	-1.2	-1.8	-1.73783			dnaJ-like protein				AT1G71000		Chaperone DnaJ-domain superfamily protein		LOC_Os01g42190.1
GRMZM5G882418		-1.8	-1.75034			Transcribed locus, strongly similar to NP_001151479.1 polygalacturonase [Zea mays]				AT3G62110		Pectin lyase-like superfamily protein		LOC_Os03g61800.1
GRMZM2G154580	-2	-1.8	-1.75531			Clone 1561281 mRNA sequence								LOC_Os10g41100.1
GRMZM2G055999	-1.1	-1.8	-1.76966			LOC100278376				AT1G23000		Heavy metal transport/detoxification superfamily protein		LOC_Os01g03490.1
GRMZM2G480607	-1.1	-1.8	-1.77381			hypothetical protein LOC100382448				AT3G13690		Protein kinase protein with adenine nucleotide alpha hydrolases-like domain		LOC_Os01g41870.1
GRMZM5G803949	-1.3	-1.8	-1.77866			Rho-related protein from plants 9
GRMZM2G318662	-1	-1.8	-1.78429			Hypothetical protein LOC100275843
GRMZM2G017536	-1.6	-1.8	-1.83462			Hypothetical protein LOC100193341				AT5G26910				LOC_Os03g19080.3
GRMZM2G092497	-1.9	-1.8	-1.98625			Clone 1493855 mRNA sequence								LOC_Os03g02020.2
GRMZM2G059392	-2.2	-1.8	-2.00938			carboxy-lyase				AT3G53450		Putative lysine decarboxylase family protein		LOC_Os05g51390.2
GRMZM2G114356		-1.8	-2.03687			proline-rich protein				AT2G21140	ATPRP2,PRP2	proline-rich protein 2		LOC_Os10g05990.2
GRMZM2G056431	-2.3	-1.8	-2.04566			metal ion transport				AT5G23760		Copper transport protein family		LOC_Os10g36200.1
GRMZM2G059151	-1.5	-1.8	-2.09005			LOC100282190				AT1G12000		Phosphofructokinase family protein		LOC_Os06g13810.1
GRMZM5G872499	-1.3	-1.8	-2.09236			integral to membrane				AT3G23430	ATPHO1,PHO1	phosphate 1		LOC_Os02g56510.1
GRMZM2G086237	-1.5	-1.8	-2.11838			TSA: Zea mays cultivar W22 CL243Contig1.betc, mRNA sequence				AT5G41140		Myosin heavy chain-related protein		LOC_Os10g36060.1
GRMZM5G832989	-1.8	-1.8	-2.28765			Putative uncharacterized protein				AT1G24764	ATMAP70-2,MAP70-2	microtubule-associated proteins 70-2		LOC_Os02g50320.1
GRMZM2G457003	-1.6	-1.8	-2.37312			hypothetical protein LOC100383401				AT3G05270		Plant protein of unknown function (DUF869)		LOC_Os11g06910.1
GRMZM2G124883	-2.2	-1.8	-2.3768			microtubule motor activity				AT1G63640		P-loop nucleoside triphosphate hydrolases superfamily protein with CH (Calponin Homology) domain		LOC_Os01g54080.1
GRMZM2G046407	-1.2	-1.8	-2.48127			TSA: Zea mays contig44035, mRNA sequence				AT2G32970				LOC_Os02g53210.4
GRMZM2G063203		-1.8	-2.58118			DNA binding		Trihelix		AT1G76890	AT-GT2,GT2	Duplicated homeodomain-like superfamily protein		LOC_Os02g43300.1
GRMZM2G051932	-1.6	-1.8	-2.58932							AT4G28760		Protein of unknown function (DUF3741)		LOC_Os04g42770.1
AC212859.3_FG008	-2	-1.8	-2.62402							AT1G71930.1	ANAC030,VND7	vascular related NAC-domain protein 7		LOC_Os08g01330.1
GRMZM2G026218	-2.1	-1.8	-2.6469			microtubule motor activity				AT5G47820	FRA1	P-loop containing nucleoside triphosphate hydrolases superfamily protein		LOC_Os09g02650.1
GRMZM2G026839	-1.9	-1.8	-2.72658			hypothetical protein LOC100278954				AT4G28760		Protein of unknown function (DUF3741)		LOC_Os02g40410.1
GRMZM2G408096	-2	-1.8	-2.74466			hypothetical protein LOC100216926				AT2G16485		nucleic acid binding;zinc ion binding;DNA binding		LOC_Os01g66140.1
GRMZM2G068192	-1.6	-1.8	-2.78654			LOC100279465				AT2G40120		Protein kinase superfamily protein		LOC_Os05g39080.1
GRMZM2G100714	-1.6	-1.8	-2.95912			hypothetical protein LOC100280300				AT1G14690	MAP65-7	microtubule-associated protein 65-7		LOC_Os03g13460.1
GRMZM2G342327	-2.2	-1.8	-3.06967			hypothetical protein LOC100193323				AT3G45090		P-loop containing nucleoside triphosphate hydrolases superfamily protein		LOC_Os02g57400.1
GRMZM2G128737	-1.9	-1.8	-3.13719			hypothetical protein LOC100381608				AT4G27595		Plant protein of unknown function (DUF827)		LOC_Os05g02820.1
GRMZM2G165944	-2.1	-1.8	-3.17281			Transcribed locus, moderately similar to XP_002468180.1 hypothetical protein SORBIDRAFT_01g041150 [Sorghum bicolor]				AT1G19835		Plant protein of unknown function (DUF869)		LOC_Os03g14250.1
GRMZM5G843914		-1.8	-3.37043			Putative uncharacterized protein				AT5G66600		Protein of unknown function, DUF547		LOC_Os03g55890.1
GRMZM2G359331	-2.3	-1.8	-3.44737			hypothetical protein LOC100275709				AT5G16730		Plant protein of unknown function (DUF827)		LOC_Os04g50204.1
GRMZM2G142019	-2.8	-1.8	-4.0119			Full-length cDNA clone ZM_BFa0064I20				AT1G77580		Plant protein of unknown function (DUF869)		LOC_Os12g07160.1
GRMZM2G004957	-1.1	-1.8				transcription factor activity		HB		AT4G04890	PDF2	protodermal factor 2		LOC_Os08g04190.1
GRMZM2G106702	-1.2	-1.8				protein kinase activity				AT4G21380	ARK3,RK3	receptor kinase 3		LOC_Os01g57560.1
GRMZM2G085198	-1.3	-1.8				hypothetical protein LOC100216632								LOC_Os02g14440.2
GRMZM2G342509	-1.3	-1.8				hypothetical protein LOC100273542 (LOC100273542), mRNA				AT4G06744		Leucine-rich repeat (LRR) family protein		LOC_Os04g42620.1
GRMZM2G101060	-1.4	-1.8				hypothetical protein LOC100382389				AT5G07610		F-box family protein		LOC_Os07g35050.1
GRMZM2G027821	-1.4	-1.8				Hypothetical protein LOC100192784				AT4G35920	MCA1	PLAC8 family protein		LOC_Os03g06120.1
GRMZM2G060554	-1.4	-1.8				hypothetical protein LOC100280272				AT1G45207		Remorin family protein		LOC_Os02g52810.1
GRMZM2G036996	-1.5	-1.8				hypothetical protein LOC100277587								LOC_Os04g47140.1
GRMZM2G089721	-1.5	-1.8				hypothetical protein LOC100382916		C2H2		AT2G28200		C2H2-type zinc finger family protein		LOC_Os04g08060.1
GRMZM2G476538	-1.5	-1.8				metabolic process				AT1G44350	ILL6	IAA-leucine resistant (ILR)-like gene 6		LOC_Os06g47620.1
GRMZM2G000219	-1.6	-1.8				copper-transporting ATPase PAA1				AT4G33520	HMA6,PAA1	P-type ATP-ase 1		LOC_Os03g27040.1
GRMZM2G112247	-1.6	-1.8				cellular retinaldehyde-binding/triple function, C-terminal				AT4G35750		SEC14 cytosolic factor family protein / phosphoglyceride transfer family protein		LOC_Os02g44820.3
GRMZM2G158140	-1.7	-1.8				two-component response regulator activity		Orphans		AT1G59940	ARR3	response regulator 3		LOC_Os04g36070.1
GRMZM2G151993	-1.7	-1.8				Polyphosphoinositide binding protein				AT5G63060		Sec14p-like phosphatidylinositol transfer family protein		LOC_Os02g21630.1
GRMZM2G125838	-1.8	-1.8				calcineurin subunit B				AT3G18430		Calcium-binding EF-hand family protein		LOC_Os02g55880.1
GRMZM2G036286	-2.1	-1.8				hypothetical protein LOC100303941				AT2G44670		Protein of unknown function (DUF581)		LOC_Os02g51550.1
GRMZM2G107199	-2.3	-1.8				hypothetical protein LOC100217085				AT3G50660	CLM,CYP90B1,DWF4,PSC1,SAV1,SNP2	Cytochrome P450 superfamily protein		LOC_Os04g39430.1
GRMZM2G108723	-2.4	-1.8								AT5G02580		Plant protein 1589 of unknown function		LOC_Os05g38680.1
GRMZM2G159953	-3.4	-1.8				protein kinase activity				AT5G55830		Concanavalin A-like lectin protein kinase family protein		LOC_Os06g17490.1
GRMZM2G023051		-1.8				hypothetical protein LOC100384146								LOC_Os06g46990.1
GRMZM2G037865		-1.8				NF-180								LOC_Os02g33780.1
GRMZM2G043992		-1.8				hypothetical protein LOC100279956								LOC_Os03g51260.1
GRMZM2G048366		-1.8				hypothetical protein LOC100194081				AT2G20515				LOC_Os04g43670.1
GRMZM2G112894		-1.8				hypothetical protein LOC100277676				AT1G11915				LOC_Os06g25950.1
GRMZM2G117344		-1.8				hypothetical protein LOC100274251				AT5G17910				LOC_Os01g59670.1
GRMZM2G180422		-1.8				LOC100280170				AT2G12400				LOC_Os02g55590.1
GRMZM2G312146		-1.8
GRMZM2G426108		-1.8				hypothetical protein LOC100277552				AT2G36220				LOC_Os01g64180.2
GRMZM2G430392		-1.8				homoiothermy				AT4G12450				LOC_Os02g44280.1
GRMZM2G700188		-1.8				Transcribed locus, moderately similar to NP_001141177.1 hypothetical protein LOC100273263 [Zea mays]
GRMZM2G125193		-1.8				DNA binding				AT5G63400	ADK1	adenylate kinase 1		LOC_Os11g20790.1
GRMZM2G168510		-1.8				hypothetical protein LOC100191165				AT1G16340	ATKDSA2,ATKSDA	Aldolase superfamily protein		LOC_Os12g10784.1
GRMZM2G017080		-1.8				hypothetical protein LOC100381432				AT4G39955		alpha/beta-Hydrolases superfamily protein		LOC_Os03g27110.1
GRMZM2G079949		-1.8				LOC100283424				AT1G47480		alpha/beta-Hydrolases superfamily protein		LOC_Os06g11130.1
GRMZM2G171912		-1.8				DNA binding		bZIP		AT5G11260	HY5,TED 5	Basic-leucine zipper (bZIP) transcription factor family protein		LOC_Os01g07880.1
GRMZM2G071790		-1.8				hypothetical protein LOC100381281				AT5G12250	TUB6	beta-6 tubulin		LOC_Os05g34170.2
GRMZM2G129642		-1.8				Transcribed locus, moderately similar to XP_002438677.1 hypothetical protein SORBIDRAFT_10g024160 [Sorghum bicolor]				AT5G06850		C2 calcium/lipid-binding plant phosphoribosyltransferase family protein		LOC_Os06g41090.1
GRMZM2G495626		-1.8				protein kinase activity				AT3G54180	CDC2B,CDKB1;1	cyclin-dependent kinase B1;1		LOC_Os01g67160.1
GRMZM2G034833		-1.8				receptor activity				AT3G26935		DHHC-type zinc finger family protein		LOC_Os01g70100.1
GRMZM2G111760		-1.8				hypothetical protein LOC100273304		Trihelix		AT1G76890	AT-GT2,GT2	Duplicated homeodomain-like superfamily protein		LOC_Os02g01380.1
GRMZM2G052562		-1.8				Zea nodulation homolog1				AT5G45910		GDSL-like Lipase/Acylhydrolase superfamily protein		LOC_Os06g06250.2
GRMZM2G006964		-1.8				gibberellin 2-beta-dioxygenase 7				AT4G21200	ATGA2OX8,GA2OX8	gibberellin 2-oxidase 8		LOC_Os04g44150.1
GRMZM2G142709		-1.8				hypothetical protein LOC100191570				AT1G70090	GATL9,LGT8	glucosyl transferase family 8		LOC_Os02g50600.1
GRMZM2G147687		-1.8				exoglucanase1				AT5G20950		Glycosyl hydrolase family protein		LOC_Os03g53800.1
GRMZM2G002569		-1.8				hypothetical protein LOC100382014				AT2G24130		Leucine-rich receptor-like protein kinase family protein		LOC_Os09g25540.1
GRMZM2G072569		-1.8				protein kinase activity				AT5G65700	BAM1	Leucine-rich receptor-like protein kinase family protein		LOC_Os03g56270.1
GRMZM2G016480		-1.8				hypothetical protein LOC100382395				AT5G58300		Leucine-rich repeat protein kinase family protein		LOC_Os03g21510.1
GRMZM2G147857		-1.8				ATP binding protein				AT5G62710		Leucine-rich repeat protein kinase family protein		LOC_Os12g44090.1
GRMZM2G078013		-1.8				nucleotide binding				AT3G46730		NB-ARC domain-containing disease resistance protein		LOC_Os11g39320.1
GRMZM2G020943		-1.8				hypothetical protein LOC100192979				AT1G70280		NHL domain-containing protein		LOC_Os06g15820.1
GRMZM2G458164		-1.8				glucan endo-1,3-beta-glucosidase A6				AT3G07320		O-Glycosyl hydrolases family 17 protein		LOC_Os09g32550.1
GRMZM2G154743		-1.8				structural constituent of ribosome				AT2G46050		Pentatricopeptide repeat (PPR-like) superfamily protein		LOC_Os07g15570.1
GRMZM2G448883		-1.8				phi-1-like phosphate-induced protein				AT4G08950	EXO	Phosphate-responsive 1 family protein		LOC_Os02g52040.1
GRMZM2G083759		-1.8				signal transducer				AT4G31820	ENP,MAB4,NPY1	Phototropic-responsive NPH3 family protein		LOC_Os09g25330.1
GRMZM2G066860		-1.8				hypothetical protein LOC100384151 (LOC100384151), mRNA				AT2G33330	PDLP3	plasmodesmata-located protein 3		LOC_Os04g45460.1
GRMZM2G181231		-1.8				protein kinase activity				AT1G33260		Protein kinase superfamily protein		LOC_Os10g37190.1
GRMZM2G014441		-1.8				hypothetical protein LOC100275496				AT5G11460		Protein of unknown function (DUF581)		LOC_Os03g53520.1
GRMZM2G041506		-1.8				hypothetical protein LOC100381838				AT2G17110		Protein of unknown function (DUF630 and DUF632)		LOC_Os04g47480.1
GRMZM2G066225		-1.8				zinc finger, C3HC4 type family protein				AT5G05830		RING/FYVE/PHD zinc finger superfamily protein		LOC_Os05g37900.1
GRMZM2G174730		-1.8				LOC100284626				AT1G61250	SC3	secretory carrier 3		LOC_Os05g42330.1
GRMZM2G163550		-1.8				hypothetical protein LOC100279187				AT2G19130		S-locus lectin protein kinase family protein		LOC_Os10g20160.1
GRMZM2G071986		-1.8				hypothetical protein LOC100383228				AT1G34160		Tetratricopeptide repeat (TPR)-like superfamily protein		LOC_Os12g17080.1
AC234521.1_FG004		-1.8								AT3G43660.1		Vacuolar iron transporter (VIT) family protein		LOC_Os04g45520.1
GRMZM2G005365		-1.8				Putative uncharacterized protein				AT5G65740		zinc ion binding		LOC_Os03g51680.1
GRMZM2G038931		-1.7	-3.99211	-3.1		hypothetical protein LOC100276373				AT5G24790		Protein of unknown function, DUF599		LOC_Os09g32100.1
GRMZM2G309071	-4.9	-1.7	-2.39066	-2.9						AT5G20610				LOC_Os01g51640.1
GRMZM2G042893	-2.1	-1.7	-2.52217	-2.5		nucleus		bHLH		AT4G29930		basic helix-loop-helix (bHLH) DNA-binding superfamily protein		LOC_Os04g23440.1
GRMZM2G481904	-1.9	-1.7	-3.44193	-2.5		glycerol metabolic process				AT5G55480	SVL1	SHV3-like 1		LOC_Os08g39350.1
GRMZM2G155253	-1.6	-1.7	-1.44425	-2.2		fructose-bisphosphate aldolase activity				AT4G38970	FBA2	fructose-bisphosphate aldolase 2		LOC_Os11g07020.1
GRMZM2G150864	-2.1	-1.7	-1.86318	-2.1		membrane protein				AT4G25830		Uncharacterised protein family (UPF0497)		LOC_Os02g08110.1
GRMZM2G042253	-1.7	-1.7	-2.77378	-2.1		protein binding				AT1G26230		TCP-1/cpn60 chaperonin family protein		ChrSy.fgenesh.mRNA.28
GRMZM2G339122	-1.9	-1.7		-2.1		alpha expansin1				AT1G69530	AT-EXP1,ATEXP1,ATEXPA1,ATHEXP ALPHA 1.2,EXP1,EXPA1	expansin A1		LOC_Os01g60770.1
GRMZM2G112968	-2	-1.7	-1.17757	-2		nucleic acid binding				AT4G21585	ENDO4	endonuclease 4		LOC_Os01g03730.1
GRMZM2G147279	-1.9	-1.7	-1.76502	-2		hypothetical protein LOC100275488				AT5G07020		proline-rich family protein		LOC_Os02g35090.1
AC212835.3_FG002	-1.3	-1.7	-1.9463	-2						AT5G07475.1		Cupredoxin superfamily protein		LOC_Os04g46130.1
GRMZM2G142383	-2	-1.7	-2.5402	-2		ATP binding				AT3G27190	UKL2	uridine kinase-like 2		LOC_Os08g41790.1
GRMZM5G811731	-1.4	-1.7	-1.55692	-1.9		TSA: Zea mays contig19225, mRNA sequence				AT4G18570		Tetratricopeptide repeat (TPR)-like superfamily protein		LOC_Os05g49820.1
AC233935.1_FG005	-1.4	-1.7	-1.71027	-1.8						AT3G55370.3	OBP3	OBF-binding protein 3		LOC_Os03g16850.1
GRMZM2G423831	-1.6	-1.7	-1.83233	-1.8		hypothetical protein LOC100304356				AT5G24060		Pentatricopeptide repeat (PPR) superfamily protein		LOC_Os11g34130.1
GRMZM2G104325	-2.3	-1.7	-2.05078	-1.7		LOC100216710				AT5G62670	AHA11,HA11	H(+)-ATPase 11		LOC_Os07g09340.1
GRMZM5G836910	-1.3	-1.7	-2.05235	-1.7		aspartate aminotransferase				AT4G31990	AAT3,ASP5,ATAAT1	aspartate aminotransferase 5		LOC_Os02g55420.1
AC149810.2_FG008	-1.5	-1.7	-1.22409							AT2G17220.1		Protein kinase superfamily protein		LOC_Os03g03890.1
GRMZM2G064302		-1.7	-1.24114			enolase1				AT2G36530	ENO2,LOS2	Enolase		LOC_Os06g04510.1
GRMZM2G473001		-1.7	-1.24351			phosphoenolpyruvate carboxylase				AT1G53310	ATPEPC1,ATPPC1,PEPC1,PPC1	phosphoenolpyruvate carboxylase 1		LOC_Os09g14670.1
GRMZM2G171677	-1	-1.7	-1.24532			LOC100191726				AT1G62400	HT1	Protein kinase superfamily protein		LOC_Os01g01740.1
GRMZM2G092752		-1.7	-1.34024			chromatin
GRMZM2G437460		-1.7	-1.35757			auxin response factor 12				AT2G33860	ARF3,ETT	Transcriptional factor B3 family protein / auxin-responsive factor AUX/IAA-related		LOC_Os01g48060.2
GRMZM2G007404		-1.7	-1.35971			hypothetical protein LOC100272553				AT3G62830	ATUXS2,AUD1,UXS2	NAD(P)-binding Rossmann-fold superfamily protein		LOC_Os05g29990.1
GRMZM2G019185		-1.7	-1.39561			lichenase-2				AT3G57260	BG2,BGL2,PR-2,PR2	beta-1,3-glucanase 2		LOC_Os01g71474.1
GRMZM2G452633		-1.7	-1.43625			Transcribed locus				AT4G32330		TPX2 (targeting protein for Xklp2) protein family		LOC_Os02g10690.1
GRMZM2G147775		-1.7	-1.45056			actin binding				AT2G16700	ADF5,ATADF5	actin depolymerizing factor 5		LOC_Os03g13950.1
GRMZM2G006429		-1.7	-1.45552			LOC100283184				AT1G09160		Protein phosphatase 2C family protein		LOC_Os03g18970.1
GRMZM2G007277	-1.1	-1.7	-1.45953			hypothetical protein LOC100280270				AT4G09510	CINV2	cytosolic invertase 2		LOC_Os11g07440.1
GRMZM2G065214	-1.5	-1.7	-1.46935			protein kinase activity				AT2G18470	PERK4	roline-rich extensin-like receptor kinase 4		LOC_Os03g56470.1
GRMZM2G122302		-1.7	-1.49069			blue copper protein				AT2G32300	UCC1	uclacyanin 1		LOC_Os06g11490.1
GRMZM2G147966	-1.1	-1.7	-1.49715			peroxidase activity				AT1G19230		Riboflavin synthase-like superfamily protein		LOC_Os09g26660.1
GRMZM2G175232		-1.7	-1.50513			hypothetical protein LOC100382234		MYB		AT5G26660	ATMYB86,MYB86	myb domain protein 86		LOC_Os05g46610.1
GRMZM2G424577	-1.7	-1.7	-1.51077			aminopeptidase activity				AT5G19290		alpha/beta-Hydrolases superfamily protein		LOC_Os01g21560.1
GRMZM2G038964		-1.7	-1.52257			iron ion binding				AT2G34770	ATFAH1,FAH1	fatty acid hydroxylase 1		LOC_Os03g56820.1
GRMZM2G071688	-2.1	-1.7	-1.52292			hypothetical protein LOC100193674				AT1G23070		Protein of unknown function (DUF300)		LOC_Os03g29340.1
GRMZM2G002128	-1.3	-1.7	-1.52532			hypothetical protein LOC100280222		MYB		AT2G38090		Duplicated homeodomain-like superfamily protein		LOC_Os05g37730.1
GRMZM2G018241		-1.7	-1.53242			cellulose synthase-9				AT5G05170	ATCESA3,ATH-B,CESA3,CEV1,IXR1	Cellulose synthase family protein		LOC_Os07g10770.1
AC215260.3_FG003	-2.2	-1.7	-1.53319							AT5G48930.1	HCT	hydroxycinnamoyl-CoA shikimate/quinate hydroxycinnamoyl transferase		LOC_Os08g43040.1
GRMZM2G019838		-1.7	-1.54577			Putative uncharacterized protein				AT5G40160	EMB139,EMB506	Ankyrin repeat family protein		LOC_Os06g13000.1
GRMZM2G037469	-1.2	-1.7	-1.55462			galactosylgalactosylxylosylprotein 3-beta-glucuronosyltransferase 1				AT1G27600	I9H,IRX9-L	Nucleotide-diphospho-sugar transferases superfamily protein		LOC_Os01g48440.1
GRMZM2G050730		-1.7	-1.58118			pop3 peptide				AT5G22580		Stress responsive A/B Barrel Domain		LOC_Os11g05290.1
GRMZM2G150187		-1.7	-1.58449			lipid metabolic process				AT1G56670		GDSL-like Lipase/Acylhydrolase superfamily protein		LOC_Os01g22640.1
GRMZM2G111593	-1.1	-1.7	-1.60757			protein binding				AT1G18610		Galactose oxidase/kelch repeat superfamily protein		LOC_Os01g19480.1
GRMZM2G015040	-1.3	-1.7	-1.61133			hypothetical protein LOC100278435				AT3G15820	ROD1	phosphatidic acid phosphatase-related / PAP2-related		LOC_Os06g40500.1
GRMZM2G076526	-2	-1.7	-1.65901			ABC transporter-like protein				AT3G13220	ABCG26,WBC27	ABC-2 type transporter family protein		LOC_Os06g40550.1
GRMZM2G071970	-1.5	-1.7	-1.66387			brittle stalk-2-like protein 4				AT5G60920	COB	COBRA-like extracellular glycosyl-phosphatidyl inositol-anchored protein family		LOC_Os05g32110.1
GRMZM2G082376	-1.2	-1.7	-1.66641			protein binding				AT3G25030		RING/U-box superfamily protein		LOC_Os01g68900.1
GRMZM2G017520		-1.7	-1.67961			LOC100280710		MYB		AT1G09540	ATMYB61,MYB61	myb domain protein 61		LOC_Os01g18240.1
GRMZM2G149383	-1.6	-1.7	-1.69747			TSA: Zea mays contig08079, mRNA sequence				AT1G72640		NAD(P)-binding Rossmann-fold superfamily protein		LOC_Os03g29730.1
GRMZM2G060922	-2.1	-1.7	-1.70924			small basic membrane intrinsic protein1b				AT3G04090	SIP1;1,SIP1A	small and basic intrinsic protein 1A		LOC_Os01g08660.1
GRMZM2G159554	-1.5	-1.7	-1.7098			50S ribosomal protein L29				AT5G65220		Ribosomal L29 family protein		LOC_Os02g51790.1
GRMZM2G014981	-1.1	-1.7	-1.7123			1-acyl-sn-glycerol-3-phosphate acyltransferase 4				AT3G18850	LPAT5	lysophosphatidyl acyltransferase 5		LOC_Os05g42270.1
GRMZM2G150841		-1.7	-1.71303			hypothetical protein LOC100193196		MYB		AT5G26660	ATMYB86,MYB86	myb domain protein 86		LOC_Os07g44090.3
GRMZM2G160585	-1.4	-1.7	-1.74619			LOC100281712				AT5G67230	I14H,IRX14-L	Nucleotide-diphospho-sugar transferases superfamily protein		LOC_Os04g55670.1
AC204641.5_FG001		-1.7	-1.78237							AT5G60570.1		Galactose oxidase/kelch repeat superfamily protein		LOC_Os04g52830.1
GRMZM2G470914	-1.3	-1.7	-1.79332							AT5G56890		Protein kinase superfamily protein		LOC_Os01g51290.1
GRMZM5G806839	-1.6	-1.7	-1.79928			DNA binding				AT2G44940		Integrase-type DNA-binding superfamily protein		LOC_Os10g41130.1
GRMZM2G113420	-1.3	-1.7	-1.80964			hypothetical protein LOC100192598				AT3G13560		O-Glycosyl hydrolases family 17 protein		LOC_Os07g38930.1
GRMZM2G341959	-2.2	-1.7	-1.86515			flavonol 4-sulfotransferase				AT5G07010	ATST2A,ST2A	sulfotransferase 2A		LOC_Os09g08190.1
GRMZM2G400489	-2.8	-1.7	-1.86723			nucleic acid binding				AT5G47390		myb-like transcription factor family protein		LOC_Os01g09280.1
GRMZM2G077278	-1.4	-1.7	-1.88612			hypothetical protein LOC100192108				AT3G01090	AKIN10,KIN10,SNRK1.1	SNF1 kinase homolog 10		LOC_Os05g45420.1
GRMZM2G171408		-1.7	-1.92456			hypothetical protein LOC100194379				AT4G31890		ARM repeat superfamily protein		LOC_Os09g25000.1
GRMZM5G837869	-1.3	-1.7	-1.92747			monooxygenase activity				AT1G31800	CYP97A3,LUT5	cytochrome P450, family 97, subfamily A, polypeptide 3		LOC_Os02g57290.1
GRMZM2G092923	-1.5	-1.7	-1.93754			LOC100280768				AT2G37250	ADK,ATPADK1	adenosine kinase		LOC_Os03g03820.1
GRMZM2G059887		-1.7	-1.96411			AGP16				AT2G46330	AGP16,ATAGP16	arabinogalactan protein 16		LOC_Os01g46850.1
GRMZM2G073180	-1.4	-1.7	-1.99602			hypothetical protein LOC100382620 (LOC100382620), mRNA				AT4G16100		Protein of unknown function (DUF789)		LOC_Os01g20120.1
GRMZM5G828581		-1.7	-2.00053			Hypothetical protein LOC100193850				AT2G28315		Nucleotide/sugar transporter family protein		LOC_Os02g41780.1
GRMZM2G042127		-1.7	-2.00802			hypothetical protein LOC100216695				AT5G45540		Protein of unknown function (DUF594)		LOC_Os07g08270.1
GRMZM2G127143	-2.2	-1.7	-2.02206							AT4G02360		Protein of unknown function, DUF538		LOC_Os11g13720.1
GRMZM2G166999	-1.8	-1.7	-2.07995			Full-length cDNA clone ZM_BFb0310B01				AT3G29185		Domain of unknown function (DUF3598)		LOC_Os03g55164.1
GRMZM2G142873	-1.1	-1.7	-2.11379			hypothetical protein LOC100274282				AT4G31780	MGD1,MGDA	monogalactosyl diacylglycerol synthase 1		LOC_Os09g25580.1
GRMZM2G083599		-1.7	-2.1331			hypothetical protein LOC100272735				AT1G64760		O-Glycosyl hydrolases family 17 protein		LOC_Os11g36940.1
GRMZM2G080270		-1.7	-2.14435			hypothetical protein LOC100383618				AT5G58300		Leucine-rich repeat protein kinase family protein		LOC_Os07g48310.1
GRMZM2G033612	-1.5	-1.7	-2.17941			ATP binding		Orphans		AT3G13960	AtGRF5,GRF5	growth-regulating factor 5		LOC_Os03g47140.1
GRMZM2G383807		-1.7	-2.20146			protein phosphatase 2C ABI2				AT1G17550	HAB2	homology to ABI2		LOC_Os05g51510.1
GRMZM2G090935		-1.7	-2.22656			LOC100282106				AT4G32330		TPX2 (targeting protein for Xklp2) protein family		LOC_Os02g10690.1
GRMZM5G829946	-1.5	-1.7	-2.27681			lipid metabolic process				AT5G41080		PLC-like phosphodiesterases superfamily protein		LOC_Os02g31030.1
GRMZM2G123585		-1.7	-2.28722			hypothetical protein LOC100194247				AT5G47380		Protein of unknown function, DUF547		LOC_Os10g41040.2
GRMZM2G076276	-1.9	-1.7	-2.31353			hypothetical protein LOC100383199				AT3G61130	GAUT1,LGT1	galacturonosyltransferase 1		LOC_Os06g49810.1
GRMZM2G070015	-1.4	-1.7	-2.31583			hypothetical protein LOC100276961				AT1G70200		RNA-binding (RRM/RBD/RNP motifs) family protein		LOC_Os02g22070.1
GRMZM2G000764		-1.7	-2.39445							AT1G78240	OSU1,QUA2,TSD2	S-adenosyl-L-methionine-dependent methyltransferases superfamily protein		LOC_Os02g51860.1
GRMZM2G008242	-2	-1.7	-2.50209			serine esterase family protein				AT4G25770		alpha/beta-Hydrolases superfamily protein		LOC_Os02g54580.1
GRMZM2G414915		-1.7	-2.69682			LOC100286067				AT5G51750	ATSBT1.3,SBT1.3	subtilase 1.3		LOC_Os04g48416.1
GRMZM2G335280		-1.7	-2.7428			lipid metabolic process				AT1G71250		GDSL-like Lipase/Acylhydrolase superfamily protein		LOC_Os02g50690.1
GRMZM2G132273		-1.7	-2.76835			disease resistance response protein 206				AT1G58170		Disease resistance-responsive (dirigent-like protein) family protein		LOC_Os12g07580.1
GRMZM2G478414		-1.7	-2.79101			anther-specific proline-rich protein APG				AT5G45670		GDSL-like Lipase/Acylhydrolase superfamily protein		LOC_Os01g52770.1
GRMZM2G063806	-2.1	-1.7	-2.90885			serine-type peptidase activity				AT5G43310		COP1-interacting protein-related		LOC_Os07g26440.1
GRMZM2G147500	-1.6	-1.7	-2.94637			hypothetical protein LOC100276431				AT5G57410		Afadin/alpha-actinin-binding protein		LOC_Os08g14460.2
GRMZM2G073540	-1.1	-1.7	-3.03927			acyl-desaturase				AT3G02620		Plant stearoyl-acyl-carrier-protein desaturase family protein		LOC_Os03g30950.1
GRMZM2G169116	-2.5	-1.7	-3.06125			hypothetical protein LOC100193454				AT1G79270	ECT8	evolutionarily conserved C-terminal region 8		LOC_Os01g48790.1
GRMZM2G079904	-2.1	-1.7	-3.20775			TSA: Zea mays contig35816, mRNA sequence				AT1G53090	SPA4	SPA1-related 4		LOC_Os01g52640.3
GRMZM2G042323	-2.3	-1.7	-3.34029			hypothetical protein LOC100383490								LOC_Os06g02520.1
GRMZM2G167594	-3.1	-1.7	-3.36169			TSA: Zea mays contig59867, mRNA sequence				AT3G14205		Phosphoinositide phosphatase family protein		LOC_Os06g09540.1
GRMZM2G168375	-2.3	-1.7	-3.55544			LOC100283872				AT5G59480		Haloacid dehalogenase-like hydrolase (HAD) superfamily protein		LOC_Os01g74152.1
GRMZM2G101711	-3.2	-1.7	-4.53361			Hypothetical protein LOC100381868
GRMZM5G847982	-1	-1.7				hypothetical protein LOC100279454				AT5G56980				LOC_Os05g46340.1
GRMZM2G178741	-1.1	-1.7				transcription factor activity		HB		AT1G69780	ATHB13	Homeobox-leucine zipper protein family		LOC_Os03g07450.1
GRMZM2G155343	-1.2	-1.7				hypothetical protein LOC100278058 (LOC100278058), mRNA				AT3G17950				LOC_Os06g14530.1
GRMZM2G176595	-1.2	-1.7				LOC542566				AT1G65680	ATEXPB2,ATHEXP BETA 1.4,EXPB2	expansin B2		LOC_Os10g40700.1
GRMZM2G030567	-1.3	-1.7				hypothetical protein LOC100192905 (LOC100192905), mRNA								LOC_Os03g02660.1
GRMZM2G033489	-1.3	-1.7				hypothetical protein LOC100274049								LOC_Os03g47190.1
GRMZM2G175860	-1.3	-1.7				hypothetical protein LOC100273460				AT5G25530		DNAJ heat shock family protein		LOC_Os01g65480.1
GRMZM2G125552	-1.3	-1.7				hypothetical protein LOC100272708				AT3G02875	ILR1	Peptidase M20/M25/M40 family protein		LOC_Os03g62060.1
GRMZM2G027439	-1.3	-1.7				BRASSINOSTEROID INSENSITIVE 1-associated receptor kinase 1				AT3G49750	AtRLP44,RLP44	receptor like protein 44		LOC_Os09g04490.1
GRMZM2G093603	-1.3	-1.7				magnesium ion binding				AT1G79460	ATKS,ATKS1,GA2,KS,KS1	Terpenoid cyclases/Protein prenyltransferases superfamily protein		LOC_Os04g52230.1
GRMZM2G078324	-1.4	-1.7				hypothetical protein LOC100277436				AT2G23670	YCF37	homolog of Synechocystis YCF37		LOC_Os02g57020.1
GRMZM2G055154	-1.4	-1.7				protein kinase activity				AT2G17220		Protein kinase superfamily protein		LOC_Os06g51170.1
GRMZM2G126235	-1.4	-1.7				ion channel activity				AT4G03560	ATCCH1,ATTPC1,FOU2,TPC1	two-pore channel 1		LOC_Os01g48680.1
GRMZM2G013214	-1.5	-1.7				metabolic process				AT1G74920	ALDH10A8	aldehyde dehydrogenase 10A8		LOC_Os08g32870.1
GRMZM5G800723	-1.5	-1.7				drug transmembrane transport				AT3G21690		MATE efflux family protein		LOC_Os03g37640.1
GRMZM2G143625	-1.5	-1.7				acyl-desaturase				AT3G02610		Plant stearoyl-acyl-carrier-protein desaturase family protein		LOC_Os04g31070.1
GRMZM2G007140	-1.6	-1.7				oxidoreductase activity				AT1G06650		2-oxoglutarate (2OG) and Fe(II)-dependent oxygenase superfamily protein		LOC_Os03g48430.1
GRMZM2G004898	-1.7	-1.7				Clone 298254 mRNA sequence								LOC_Os08g40500.1
GRMZM2G026911	-1.7	-1.7				PCS1				AT2G39710		Eukaryotic aspartyl protease family protein		LOC_Os03g16500.1
GRMZM5G835542	-1.8	-1.7				2-C-methyl-D-erythritol 2,4-cyclodiphosphate synthase				AT1G63970	ISPF,MECPS	isoprenoid F		LOC_Os02g45660.1
GRMZM2G170413	-1.8	-1.7				protein binding				AT2G15580		RING/U-box superfamily protein		LOC_Os02g55480.2
GRMZM2G310569	-1.9	-1.7				ion channel activity				AT3G02850	SKOR	STELAR K+ outward rectifier		LOC_Os06g14030.1
GRMZM2G180160	-1.9	-1.7				protein kinase activity				AT1G21230	WAK5	wall associated kinase 5		LOC_Os04g51030.1
GRMZM2G035213	-2	-1.7				LOC732837				AT1G64970	G-TMT,TMT1,VTE4	gamma-tocopherol methyltransferase		LOC_Os02g47310.1
GRMZM2G126496	-2.1	-1.7				metabolic process				AT4G23420		NAD(P)-binding Rossmann-fold superfamily protein		LOC_Os04g22390.1
GRMZM2G010927	-2.2	-1.7				hypothetical protein LOC100278747				AT5G54660		HSP20-like chaperones superfamily protein		LOC_Os05g42120.1
GRMZM2G072298	-2.3	-1.7				glycerol-3-phosphate acyltransferase 1				AT4G01950	ATGPAT3,GPAT3	glycerol-3-phosphate acyltransferase 3		LOC_Os01g14900.1
GRMZM2G030583	-2.3	-1.7				monoterpene synthase				AT5G23960	ATTPS21,TPS21	terpene synthase 21		LOC_Os01g23530.1
GRMZM2G099382	-2.8	-1.7				tonoplast dicarboxylate transporter				AT5G47560	ATSDAT,ATTDT,TDT	tonoplast dicarboxylate transporter		LOC_Os08g39370.1
GRMZM2G021055	-3.4	-1.7				hypothetical protein LOC100275607				AT3G26590		MATE efflux family protein		LOC_Os03g42830.1
AC210193.4_FG002		-1.7												LOC_Os01g55000.1
GRMZM2G067583		-1.7				tat pathway signal sequence family protein				AT2G01400				LOC_Os01g45640.1
GRMZM2G073197		-1.7				LOC100276842				AT1G11120				LOC_Os07g37820.1
GRMZM2G147659		-1.7				hypothetical protein LOC100278009				AT1G63310				LOC_Os04g01500.1
GRMZM2G147772		-1.7				Clone 292413 mRNA sequence				AT1G01453				LOC_Os02g16030.1
GRMZM2G102349		-1.7				Alternative oxidase (EC 1.-.-.-)				AT4G22260	IM,IM1	Alternative oxidase family protein		LOC_Os04g57320.1
GRMZM2G149040		-1.7				hypothetical protein LOC100273514		bZIP		AT2G40620		Basic-leucine zipper (bZIP) transcription factor family protein		LOC_Os07g48180.1
GRMZM2G175870		-1.7				hypothetical protein LOC100274522		bZIP		AT2G16770	bZIP23	Basic-leucine zipper (bZIP) transcription factor family protein		LOC_Os05g41540.1
GRMZM2G062019		-1.7				gibberellin receptor GID1L2				AT5G23530	AtCXE18,CXE18	carboxyesterase 18		LOC_Os11g13570.1
GRMZM2G072107		-1.7				protein kinase activity				AT4G14340	CKI1,CKL11	casein kinase I		LOC_Os04g43490.1
GRMZM2G149751		-1.7				5-methyltetrahydropteroyltriglutamate-homocysteine S-methyltransferase activity				AT5G17920	ATCIMS,ATMETS,ATMS1	Cobalamin-independent synthase family protein		LOC_Os12g42884.1
GRMZM2G109326		-1.7				carbohydrate binding				AT5G15630	COBL4,IRX6	COBRA-like extracellular glycosyl-phosphatidyl inositol-anchored protein family		LOC_Os03g30250.1
GRMZM2G102605		-1.7				Cold acclimation WCOR413-like protein gamma form				AT1G29390	COR314-TM2,COR413IM2	cold regulated 314 thylakoid membrane 2		LOC_Os05g49170.1
GRMZM2G047143		-1.7				cell cycle checkpoint protein MAD2 homolog				AT3G25980	MAD2	DNA-binding HORMA family protein		LOC_Os04g40940.1
GRMZM2G173684		-1.7				hypothetical protein LOC100193708				AT3G59310		Eukaryotic protein of unknown function (DUF914)		LOC_Os08g42720.1
GRMZM2G137779		-1.7				membrane				AT2G20370	KAM1,MUR3	Exostosin family protein		LOC_Os03g05110.1
GRMZM2G112686		-1.7				esterase				AT5G45910		GDSL-like Lipase/Acylhydrolase superfamily protein		LOC_Os01g11710.1
GRMZM2G016232		-1.7				histone H4				AT3G53730		Histone superfamily protein		LOC_Os07g36500.1
GRMZM2G430266		-1.7				dopamine receptor activity				AT1G72790		hydroxyproline-rich glycoprotein family protein
GRMZM2G087955		-1.7				DNA binding		MYB		AT2G23290	AtMYB70,MYB70	myb domain protein 70		LOC_Os09g01960.1
GRMZM2G427031		-1.7				DNA binding				AT3G23780	DMS2,DRD2,NRPD2,NRPD2A,NRPE2	nuclear RNA polymerase D2A		LOC_Os04g54840.1
GRMZM2G030713		-1.7				Transcribed locus, strongly similar to XP_002460894.1 hypothetical protein SORBIDRAFT_02g037060 [Sorghum bicolor]				AT1G17270		O-fucosyltransferase family protein		LOC_Os07g38490.1
GRMZM2G045596		-1.7				hypothetical protein LOC100191933				AT4G20050	QRT3	Pectin lyase-like superfamily protein		LOC_Os04g52320.1
GRMZM2G089895		-1.7				LOC100284675				AT1G05260	RCI3,RCI3A	Peroxidase superfamily protein		LOC_Os05g42000.1
GRMZM2G102163		-1.7				hypothetical protein LOC100280175				AT2G20300	ALE2	Protein kinase superfamily protein		LOC_Os02g57080.1
GRMZM2G007055		-1.7				Putative uncharacterized protein				AT5G05840		Protein of unknown function (DUF620)		LOC_Os03g16060.1
GRMZM2G083382		-1.7				protein binding				AT1G20823		RING/U-box superfamily protein		LOC_Os10g39450.1
GRMZM2G156218		-1.7				hypothetical protein LOC100193146				AT5G63060		Sec14p-like phosphatidylinositol transfer family protein		LOC_Os02g21630.1
GRMZM5G826911		-1.7				hypothetical protein LOC100191913				AT2G40320	TBL33	TRICHOME BIREFRINGENCE-LIKE 33		LOC_Os03g60350.1
GRMZM2G429237		-1.7				cysteine-type endopeptidase/ ubiquitin thiolesterase				AT1G16860		Ubiquitin-specific protease family C19-related protein		LOC_Os04g45821.1
GRMZM2G072589		-1.7				integral to membrane				AT4G02500	ATXT2,XT2,XXT2	UDP-xylosyltransferase 2		LOC_Os03g18820.1
GRMZM2G425398		-1.7								AT3G53850		Uncharacterised protein family (UPF0497)		LOC_Os09g07480.1
GRMZM2G319798		-1.7				hydrolase activity, hydrolyzing O-glycosyl compounds				AT1G14720	ATXTH28,EXGT-A2,XTH28,XTR2	xyloglucan endotransglucosylase/hydrolase 28		LOC_Os09g23220.1
GRMZM2G133718	-2.2	-1.6		-3		serine-type carboxypeptidase activity				AT2G35770	scpl28	serine carboxypeptidase-like 28		LOC_Os01g06490.1
GRMZM2G048904	-2.8	-1.6	-2.7385	-2.8		alpha-L-fucosidase 2				AT1G28590		GDSL-like Lipase/Acylhydrolase superfamily protein		LOC_Os06g47910.1
GRMZM2G010034	-1.5	-1.6	-1.52059	-2.5		hypothetical protein LOC100277758				AT1G62250				LOC_Os03g53300.1
GRMZM2G078024	-1.2	-1.6	-2.54807	-2.4		TSA: Zea mays contig18394, mRNA sequence				AT2G39890	ATPROT1,PROT1	proline transporter 1		LOC_Os01g68050.1
GRMZM2G160069		-1.6	-1.8932	-2.2		hypothetical protein LOC100383930				AT4G16480	ATINT4,INT4	inositol transporter 4		LOC_Os04g43210.1
GRMZM2G077054		-1.6	-2.20655	-2.1		flavin-containing monooxygenase activity				AT5G53460	GLT1	NADH-dependent glutamate synthase 1		LOC_Os01g48960.1
GRMZM2G104608	-2.3	-1.6	-2.2421	-2.1		catalytic activity				AT4G25290		DNA photolyases;DNA photolyases		LOC_Os09g36240.1
GRMZM2G404043		-1.6	-1.97149	-2		Transcribed locus				AT1G09900		Pentatricopeptide repeat (PPR-like) superfamily protein		LOC_Os01g57410.1
GRMZM2G110258	-1.6	-1.6	-1.98859	-2		hypothetical protein LOC100193975				AT4G34090				LOC_Os03g01920.1
GRMZM2G412611	-2	-1.6	-2.15452	-2		hypothetical protein LOC100381411				AT1G10760	GWD,GWD1,SEX1,SOP,SOP1	Pyruvate phosphate dikinase, PEP/pyruvate binding domain		LOC_Os06g30310.1
GRMZM2G314769	-2.4	-1.6	-1.79191	-1.9		LOC100192837				AT1G19715		Mannose-binding lectin superfamily protein		LOC_Os03g28160.1
GRMZM2G048008	-1.6	-1.6	-1.98145	-1.9		transferase activity, transferring glycosyl groups				AT5G47780	GAUT4	galacturonosyltransferase 4		LOC_Os09g30280.1
GRMZM2G061602	-2.3	-1.6	-3.43316	-1.9		protein serine/threonine kinase activity				AT1G53090	SPA4	SPA1-related 4		LOC_Os01g52640.3
GRMZM2G180283	-2.2	-1.6	-1.73829	-1.8		hypothetical protein LOC100272786				AT2G22590		UDP-Glycosyltransferase superfamily protein		LOC_Os02g37690.1
GRMZM2G325019		-1.6	-1.88927	-1.8		endonuclease activity				AT2G15820	OTP51	endonucleases		LOC_Os02g47360.1
GRMZM2G044247	-1.5	-1.6	-2.13228	-1.8		LOC100284607				AT5G52100	crr1	Dihydrodipicolinate reductase, bacterial/plant		LOC_Os03g02690.2
GRMZM2G113761	-1.1	-1.6	-2.3633	-1.8		xyloglucan endotransglucosylase/hydrolase protein 32				AT2G36870	XTH32	xyloglucan endotransglucosylase/hydrolase 32		LOC_Os10g39840.1
GRMZM2G023591	-1.6	-1.6	-1.46123	-1.7		ribonucleoprotein				AT4G09040		RNA-binding (RRM/RBD/RNP motifs) family protein		LOC_Os08g37700.2
GRMZM2G025659	-1.6	-1.6	-1.51448	-1.7		hypothetical protein LOC100193707				AT4G12830		alpha/beta-Hydrolases superfamily protein		LOC_Os01g69060.1
GRMZM2G040638		-1.6	5.17422			peroxidase				AT1G05260	RCI3,RCI3A	Peroxidase superfamily protein		LOC_Os03g25330.1
GRMZM2G049538		-1.6	4.13486			terpene synthase1				AT1G79460	ATKS,ATKS1,GA2,KS,KS1	Terpenoid cyclases/Protein prenyltransferases superfamily protein		LOC_Os04g52210.1
GRMZM2G475899		-1.6	1.6096			Histone H3.2				AT1G09200		Histone superfamily protein		LOC_Os04g34240.1
GRMZM2G424832		-1.6	-1.23781			cellulose synthase-4				AT5G05170	ATCESA3,ATH-B,CESA3,CEV1,IXR1	Cellulose synthase family protein		LOC_Os07g10770.1
GRMZM2G398807		-1.6	-1.2435			cortical cell-delineating protein				AT4G12520		Bifunctional inhibitor/lipid-transfer protein/seed storage 2S albumin superfamily protein		LOC_Os02g44320.1
GRMZM5G872070		-1.6	-1.24646			Full-length cDNA clone ZM_BFb0236O04				AT3G15480		Protein of unknown function (DUF1218)		LOC_Os07g27810.1
GRMZM2G343048	-1.3	-1.6	-1.25965			hypothetical protein LOC100303855 (LOC100303855), mRNA
GRMZM2G016184		-1.6	-1.26379			integral to membrane				AT1G31300		TRAM, LAG1 and CLN8 (TLC) lipid-sensing domain containing protein		LOC_Os03g46410.1
GRMZM5G815358		-1.6	-1.27906			hypothetical protein LOC100274071				AT5G42900	COR27	cold regulated gene 27		LOC_Os03g08580.1
AC210013.4_FG002		-1.6	-1.30185							AT5G26330.1		Cupredoxin superfamily protein		LOC_Os03g59280.1
GRMZM2G086123		-1.6	-1.32818			LOC100191796				AT2G28150		Domain of unknown function (DUF966)		LOC_Os08g44760.2
GRMZM2G011746	-1.6	-1.6	-1.33716			hypothetical protein LOC100194203				AT1G10830	Z-ISO,Z-ISO1.1,Z-ISO1.2	15-cis-zeta-carotene isomerase		LOC_Os12g21710.1
GRMZM2G017145	-1.1	-1.6	-1.34975			amelogenin precursor like protein		bHLH
GRMZM2G051185	-1.6	-1.6	-1.35902			fasciclin-like arabinogalactan protein 8				AT2G20520	FLA6	FASCICLIN-like arabinogalactan 6		LOC_Os02g20540.1
GRMZM2G000660	-1.2	-1.6	-1.37711			dual-specificity protein-like phosphatase 3				AT3G10940		dual specificity protein phosphatase (DsPTP1) family protein		LOC_Os12g02120.1
GRMZM2G010142	-1.7	-1.6	-1.39616			TSA: Zea mays contig38006, mRNA sequence				AT5G03760	ATCSLA09,ATCSLA9,CSLA09,CSLA9,RAT4	Nucleotide-diphospho-sugar transferases superfamily protein		LOC_Os07g43710.1
GRMZM2G008247	-1.7	-1.6	-1.40434			beta-D-glucosidase precursor				AT5G44640	BGLU13	beta glucosidase 13		LOC_Os04g39880.1
GRMZM2G163138		-1.6	-1.40561			protein binding				AT1G28340	AtRLP4,RLP4	receptor like protein 4		LOC_Os07g31840.1
GRMZM2G176235		-1.6	-1.41501			hypothetical protein LOC100274643								LOC_Os03g47190.1
GRMZM2G108273	-1.8	-1.6	-1.42873			tonoplast intrinsic protein4				AT2G25810	TIP4;1	tonoplast intrinsic protein 4;1		LOC_Os05g14240.1
GRMZM2G148807	-2	-1.6	-1.47408			receptor activity				AT1G05200	ATGLR3.4,GLR3.4,GLUR3	glutamate receptor 3.4		LOC_Os06g46670.2
GRMZM2G168190	-1.9	-1.6	-1.49971			membrane								LOC_Os03g49940.1
GRMZM2G335126	-1	-1.6	-1.50404			hypothetical protein LOC100216660				AT1G77460		Armadillo/beta-catenin-like repeat ; C2 calcium/lipid-binding domain (CaLB) protein		LOC_Os11g08090.1
AC213612.3_FG001	-1.1	-1.6	-1.51268											LOC_Os06g21270.2
GRMZM2G032003	-1.5	-1.6	-1.52502			metabolic process				AT5G17310	AtUGP2,UGP2	UDP-glucose pyrophosphorylase 2		LOC_Os09g38030.1
GRMZM2G113137		-1.6	-1.54169			cellulose synthase6				AT5G64740	CESA6,E112,IXR2,PRC1	cellulose synthase 6		LOC_Os03g62090.1
GRMZM2G003246	-1.5	-1.6	-1.55346			hypothetical protein LOC100272907				AT1G47480		alpha/beta-Hydrolases superfamily protein		LOC_Os09g28620.1
GRMZM2G081519		-1.6	-1.56631			DNA binding				AT1G34380		5\'-3\' exonuclease family protein		LOC_Os01g65400.1
GRMZM2G099944		-1.6	-1.59065			hypothetical protein LOC100382727				AT5G23860	TUB8	tubulin beta 8		LOC_Os03g56810.1
GRMZM2G160862		-1.6	-1.60528											LOC_Os04g07130.1
GRMZM2G126646		-1.6	-1.60751			hypothetical protein LOC100275344		HB		AT1G73360	ATHDG11,EDT1,HDG11	homeodomain GLABROUS 11		LOC_Os06g10600.1
GRMZM2G130109	-1.7	-1.6	-1.61711			LOC100193239				AT3G26000		Ribonuclease inhibitor		LOC_Os04g40910.1
GRMZM2G100652	-2.3	-1.6	-1.62085			biosynthetic process				AT5G01220	SQD2	sulfoquinovosyldiacylglycerol 2		LOC_Os07g01030.1
GRMZM2G071573	-1.6	-1.6	-1.64857			protein kinase activity				AT4G22130	SRF8	STRUBBELIG-receptor family 8		LOC_Os02g09740.1
GRMZM2G448185		-1.6	-1.65961			peroxidase activity				AT1G19230		Riboflavin synthase-like superfamily protein		LOC_Os09g26660.1
GRMZM2G702229	-2	-1.6	-1.66072			acid phosphatase/vanadium-dependent haloperoxidase related				AT1G67600		Acid phosphatase/vanadium-dependent haloperoxidase-related protein		LOC_Os04g40980.1
GRMZM2G061879	-4.3	-1.6	-1.70177			cysteine-type endopeptidase activity				AT5G45890	SAG12	senescence-associated gene 12		LOC_Os04g01710.1
GRMZM2G025598		-1.6	-1.72417			hypothetical protein LOC100381672				AT3G04240	SEC	Tetratricopeptide repeat (TPR)-like superfamily protein		LOC_Os02g28830.1
GRMZM2G313027		-1.6	-1.74771			LOC100273763				AT4G24610				LOC_Os02g52280.1
GRMZM2G003424	-1.6	-1.6	-1.76477			hypothetical protein LOC100384253		C3H		AT3G51950		Zinc finger (CCCH-type) family protein / RNA recognition motif (RRM)-containing protein		LOC_Os07g48410.1
AC206030.4_FG001		-1.6	-1.77117							AT5G19700.1		MATE efflux family protein		LOC_Os08g43250.1
GRMZM2G017186	-1.6	-1.6	-1.82852			LOC541703				AT5G20950		Glycosyl hydrolase family protein		LOC_Os03g53860.1
GRMZM2G045287		-1.6	-1.8961			LOC100282614				AT3G08900	RGP,RGP3	reversibly glycosylated polypeptide 3		LOC_Os07g41360.1
GRMZM2G070847	-2	-1.6	-1.93067			hypothetical protein LOC100275335				AT1G21500				LOC_Os09g34140.1
GRMZM2G071977	-2.5	-1.6	-1.93429			hypothetical protein LOC100381732		MYB-related		AT5G56840		myb-like transcription factor family protein		LOC_Os01g41900.1
GRMZM2G115635		-1.6	-1.93843			LOC100273531				AT5G62890		Xanthine/uracil permease family protein		LOC_Os08g32500.1
GRMZM2G145374		-1.6	-1.95045			hypothetical protein LOC100381751				AT4G13100		RING/U-box superfamily protein		LOC_Os01g68900.1
GRMZM2G000816	-1.9	-1.6	-2.02355			transmembrane transport				AT3G59310		Eukaryotic protein of unknown function (DUF914)		LOC_Os05g37200.1
GRMZM2G144083		-1.6	-2.04688			hypothetical protein LOC100274413				AT1G63440	HMA5	heavy metal atpase 5		LOC_Os04g46940.1
GRMZM5G825515	-1.2	-1.6	-2.08305			Hypothetical protein LOC100381394
GRMZM2G131733	-1.1	-1.6	-2.10106			TSA: Zea mays contig23112, mRNA sequence				AT3G52240				LOC_Os05g37340.1
GRMZM2G553687		-1.6	-2.10788			binding				AT2G22125	CSI1	binding		LOC_Os06g11990.1
GRMZM2G160927	-1.1	-1.6	-2.11544			extracellular region				AT5G35180		Protein of unknown function (DUF1336)		LOC_Os08g34060.1
GRMZM2G083504	-1	-1.6	-2.12388			hypothetical protein LOC100216628		bHLH		AT3G07340		basic helix-loop-helix (bHLH) DNA-binding superfamily protein		LOC_Os09g32510.1
GRMZM2G102255	-1.4	-1.6	-2.13861			catalytic activity				AT1G17550	HAB2	homology to ABI2		LOC_Os05g51510.1
GRMZM2G117700		-1.6	-2.14249			hypothetical protein LOC100216725				AT3G06040		Ribosomal protein L12/ ATP-dependent Clp protease adaptor protein ClpS family protein		LOC_Os02g10540.1
GRMZM2G153274	-2.3	-1.6	-2.14307			glycerol metabolic process				AT5G08030		PLC-like phosphodiesterases superfamily protein		LOC_Os01g55780.1
GRMZM2G049269	-1.1	-1.6	-2.15254			TSA: Zea mays contig00001, mRNA sequence				AT5G64030		S-adenosyl-L-methionine-dependent methyltransferases superfamily protein		LOC_Os01g66110.1
GRMZM2G016558	-1.4	-1.6	-2.20858							AT1G03670		ankyrin repeat family protein		LOC_Os11g14570.1
GRMZM2G118243		-1.6	-2.24252			nucleotide binding				AT2G26910	ATPDR4,PDR4	pleiotropic drug resistance 4		LOC_Os02g11760.1
GRMZM5G822449	-1.6	-1.6	-2.30784			0
GRMZM2G135091		-1.6	-2.31721			protein kinase activity				AT1G08650	ATPPCK1,PPCK1	phosphoenolpyruvate carboxylase kinase 1		LOC_Os02g41580.1
GRMZM2G008501	-1.8	-1.6	-2.50074			LOC100280001				AT2G38650	GAUT7,LGT7	galacturonosyltransferase 7		LOC_Os03g21250.1
GRMZM2G420432	-1.6	-1.6	-2.55202			hypothetical protein LOC100193635				AT4G30710		Family of unknown function (DUF566)		LOC_Os02g55110.1
GRMZM2G478664	-1.5	-1.6	-2.55582			nucleotide binding				AT5G49030	OVA2	tRNA synthetase class I (I, L, M and V) family protein		LOC_Os02g53770.1
GRMZM5G842886	-2.5	-1.6	-2.55602			Golgi membrane				AT3G59360	ATUTR6,UTR6	UDP-galactose transporter 6		LOC_Os01g67330.1
GRMZM2G353147	-1.2	-1.6	-2.55721			guanosine tetraphosphate metabolic process				AT4G02260	AT-RSH1,ATRSH1,RSH1	RELA/SPOT homolog 1		LOC_Os03g22160.1
GRMZM2G162508		-1.6	-2.59928			fatty acid elongase				AT2G26640	KCS11	3-ketoacyl-CoA synthase 11		LOC_Os10g28060.1
GRMZM2G061562	-1.6	-1.6	-2.61466			hypothetical protein LOC100279500				AT1G74160				LOC_Os07g01860.1
GRMZM2G464491	-2.2	-1.6	-2.64177			Full-length cDNA clone ZM_BFc0170M03
GRMZM2G054418	-1.8	-1.6	-2.67939			microtubule motor activity				AT2G21300		ATP binding microtubule motor family protein		LOC_Os04g45580.1
GRMZM2G071172	-1.8	-1.6	-2.87826			TSA: Zea mays contig29095, mRNA sequence				AT3G61380		Phosphatidylinositol N-acetyglucosaminlytransferase subunit P-related		LOC_Os10g40250.1
GRMZM2G079638	-1.5	-1.6	-2.91215			anther-specific protein SF18								LOC_Os01g20780.1
GRMZM2G089982		-1.6	-3.03174			peroxidase 72				AT5G66390		Peroxidase superfamily protein		LOC_Os01g15830.1
GRMZM2G096680	-3.3	-1.6	-3.45112			subtilisin-chymotrypsin inhibitor CI-1B				AT2G38870		Serine protease inhibitor, potato inhibitor I-type family protein		LOC_Os12g25090.2
GRMZM2G153233	-1	-1.6				auxin response factor 2		ARF		AT4G30080	ARF16	auxin response factor 16		LOC_Os10g33940.1
GRMZM2G120151	-1	-1.6				TCP family transcription factor containing protein		TCP		AT5G60970	TCP5	TEOSINTE BRANCHED 1, cycloidea and PCF transcription factor 5		LOC_Os05g43760.1
GRMZM2G156365	-1.1	-1.6				Transcribed locus, moderately similar to NP_001146615.1 hypothetical protein LOC100280212 [Zea mays]				AT5G45280		Pectinacetylesterase family protein		LOC_Os04g51340.1
GRMZM2G119999	-1.2	-1.6				hypothetical protein LOC100273913		HB		AT4G40060	ATHB-16,ATHB16,HB16	homeobox protein 16		LOC_Os10g23090.1
GRMZM2G140561	-1.2	-1.6				hypothetical protein LOC100273041				AT2G46300		Late embryogenesis abundant (LEA) hydroxyproline-rich glycoprotein family		LOC_Os02g16030.1
GRMZM2G138003	-1.2	-1.6				Transcribed locus, moderately similar to XP_002441940.1 hypothetical protein SORBIDRAFT_08g005240 [Sorghum bicolor]				AT2G13690		PRLI-interacting factor, putative		LOC_Os12g08720.1
GRMZM2G090435	-1.2	-1.6				homoiothermy				AT5G22090		Protein of unknown function (DUF3049)		LOC_Os03g49830.1
GRMZM2G011463	-1.2	-1.6				SAUR37 - auxin-responsive SAUR family member				AT5G20820		SAUR-like auxin-responsive protein family		LOC_Os09g26590.1
GRMZM2G073079	-1.3	-1.6				hydrolase activity				AT3G23570		alpha/beta-Hydrolases superfamily protein		LOC_Os05g33200.1
GRMZM2G158429	-1.3	-1.6				hypothetical protein LOC100275698				AT5G28150		Plant protein of unknown function (DUF868)		LOC_Os07g38460.1
GRMZM2G066516	-1.3	-1.6				hypothetical protein LOC100384830 (LOC100384830), mRNA				AT4G37080		Protein of unknown function, DUF547		LOC_Os09g28850.1
GRMZM2G093101	-1.3	-1.6				hypothetical protein LOC100274120				AT2G16430	ATPAP10,PAP10	purple acid phosphatase 10		LOC_Os01g56880.1
GRMZM2G177424	-1.4	-1.6				hypothetical protein LOC100193067				AT4G35160		O-methyltransferase family protein		LOC_Os07g27970.1
GRMZM2G389070	-1.5	-1.6				hypothetical protein LOC100277691				AT2G30230				LOC_Os05g07240.1
GRMZM2G178775	-1.5	-1.6				hypothetical protein LOC100273330				AT1G14345		NAD(P)-linked oxidoreductase superfamily protein		LOC_Os03g07440.1
GRMZM2G111954	-1.7	-1.6				oxidoreductase activity				AT1G06690		NAD(P)-linked oxidoreductase superfamily protein		LOC_Os07g04990.1
GRMZM2G004909	-2.1	-1.6				nonspecific lipid-transfer protein				AT3G18280		Bifunctional inhibitor/lipid-transfer protein/seed storage 2S albumin superfamily protein		LOC_Os05g47700.1
GRMZM2G084859	-2.1	-1.6				product:putative phytosulfokine peptide precursor				AT2G22860	ATPSK2,PSK2	phytosulfokine 2 precursor		LOC_Os03g12990.1
GRMZM2G456547	-2.4	-1.6								AT4G31240		protein kinase C-like zinc finger protein		LOC_Os04g51920.1
GRMZM2G027478		-1.6				hypothetical protein LOC100275213				AT3G56290				LOC_Os01g60830.1
GRMZM2G041645		-1.6				voltage-gated chloride channel activity				AT4G28100				LOC_Os07g37156.1
GRMZM2G089056		-1.6				Transcribed locus, moderately similar to XP_002465925.1 hypothetical protein SORBIDRAFT_01g048340 [Sorghum bicolor]				AT2G17550				LOC_Os03g03860.2
GRMZM2G090792		-1.6				hypothetical protein LOC100274868				AT1G12330				LOC_Os03g14500.1
GRMZM2G128491		-1.6				LOC100276254				AT1G35780				LOC_Os03g27010.1
GRMZM2G148270		-1.6				hypothetical protein LOC100276243				AT1G65295				LOC_Os11g27540.1
GRMZM2G166109		-1.6				expp1 protein (LOC100281966), mRNA				AT3G44150				LOC_Os03g44560.1
GRMZM2G347174		-1.6				Transcribed locus
GRMZM2G447691		-1.6				hypothetical protein LOC100274944								LOC_Os01g14130.1
GRMZM2G567452		-1.6
GRMZM2G424857		-1.6				hypothetical protein LOC100274074				AT4G37560		Acetamidase/Formamidase family protein		LOC_Os01g55950.1
GRMZM2G179658		-1.6				Transcribed locus, moderately similar to NP_001048390.1 Os02g0796600 [Oryza sativa Japonica Group]				AT4G31020		alpha/beta-Hydrolases superfamily protein		LOC_Os02g55330.1
GRMZM2G085236		-1.6				nucleotide binding				AT3G28860	ABCB19,ATABCB19,ATMDR1,ATMDR11,ATPGP19,MDR1,MDR11,PGP19	ATP binding cassette subfamily B19		LOC_Os04g38570.1
GRMZM2G092363		-1.6				CONSTANS-like protein CO8		C2C2-CO-like		AT5G24930	ATCOL4,COL4	CONSTANS-like 4		LOC_Os08g15050.1
GRMZM2G171118		-1.6				monooxygenase activity				AT3G26300	CYP71B34	cytochrome P450, family 71, subfamily B, polypeptide 34		LOC_Os03g39650.1
GRMZM2G180430		-1.6				catalytic activity		DBP		AT2G25620	AtDBP1,DBP1	DNA-binding protein phosphatase 1		LOC_Os02g55560.1
GRMZM2G008106		-1.6				uclacyanin-2				AT1G08500	AtENODL18,ENODL18	early nodulin-like protein 18		LOC_Os12g26880.1
GRMZM2G176638		-1.6				zinc ion binding				AT1G67340		HCP-like superfamily protein with MYND-type zinc finger		LOC_Os01g69270.1
GRMZM2G176486		-1.6				hypothetical protein LOC100280158				AT1G21920		Histone H3 K4-specific methyltransferase SET7/9 family protein		LOC_Os09g28060.1
GRMZM2G056600		-1.6				LOC100272620		HB		AT4G40060	ATHB-16,ATHB16,HB16	homeobox protein 16		LOC_Os09g29460.1
GRMZM2G020940		-1.6				hypothetical protein LOC100274379				AT2G39050		hydroxyproline-rich glycoprotein family protein		LOC_Os03g21040.2
GRMZM2G030882		-1.6				calmodulin binding protein				AT4G14750	IQD19	IQ-domain 19		LOC_Os03g06570.1
GRMZM2G406601		-1.6				protein kinase activity				AT1G34300		lectin protein kinase family protein		LOC_Os07g04810.1
GRMZM2G141517		-1.6				hypothetical protein LOC100383797				AT5G65700	BAM1	Leucine-rich receptor-like protein kinase family protein		LOC_Os07g04190.1
AC213884.3_FG002		-1.6								AT4G37260.1	ATMYB73,MYB73	myb domain protein 73		LOC_Os05g28320.1
GRMZM2G171395		-1.6				NAM protein		NAC		AT2G46770	ANAC043,EMB2301,NST1	NAC (No Apical Meristem) domain transcriptional regulator superfamily protein		LOC_Os06g04090.1
GRMZM2G410865		-1.6				catalytic activity				AT5G58490		NAD(P)-binding Rossmann-fold superfamily protein		LOC_Os03g60380.1
GRMZM2G023285		-1.6				transporter activity		OFP		AT5G19650	ATOFP8,OFP8	ovate family protein 8		LOC_Os01g53160.1
GRMZM2G067063		-1.6				protein disulfide isomerase12				AT3G20560	ATPDI12,ATPDIL5-3,PDI12,PDIL5-3	PDI-like 5-3		LOC_Os07g34030.1
GRMZM2G080689		-1.6				peroxidase 52				AT5G05340		Peroxidase superfamily protein		LOC_Os06g35490.1
GRMZM2G169825		-1.6				signal transducer activity				AT3G50840		Phototropic-responsive NPH3 family protein		LOC_Os03g52880.1
GRMZM2G413113		-1.6				signal transducer activity				AT1G52770		Phototropic-responsive NPH3 family protein		LOC_Os05g08530.1
GRMZM5G809195		-1.6				IAA14 - auxin-responsive Aux/IAA family member				AT4G29080	IAA27,PAP2	phytochrome-associated protein 2		LOC_Os07g08460.1
GRMZM2G125241		-1.6				LOC100283474				AT1G18650	PDCB3	plasmodesmata callose-binding protein 3		LOC_Os03g30830.1
GRMZM2G001247		-1.6				hypothetical protein LOC100193478				AT3G16660		Pollen Ole e 1 allergen and extensin family protein		LOC_Os07g47750.1
GRMZM2G148831		-1.6				lysosphingolipid and lysophosphatidic acid receptor activity				AT1G10020		Protein of unknown function (DUF1005)		LOC_Os07g04150.1
GRMZM2G149295		-1.6				cupin, RmlC-type				AT3G58670		Protein of unknown function (DUF1637)		LOC_Os09g14700.2
GRMZM2G180021		-1.6				hypothetical protein LOC100276367				AT1G29980		Protein of unknown function, DUF642		LOC_Os01g55190.1
GRMZM2G105253		-1.6				LOC100194277				AT4G38430	ATROPGEF1,ROPGEF1	rho guanyl-nucleotide exchange factor 1		LOC_Os09g37270.1
GRMZM2G304362		-1.6				ribonucleoside-diphosphate reductase activity				AT2G21790	ATRNR1,CLS8,R1,RNR1	ribonucleotide reductase 1		LOC_Os06g07210.1
GRMZM2G056786		-1.6				hypothetical protein LOC100273252				AT1G04360		RING/U-box superfamily protein		LOC_Os03g05560.1
GRMZM2G135909		-1.6				protein binding				AT5G45290		RING/U-box superfamily protein		LOC_Os05g32350.1
GRMZM2G425965		-1.6				LOC100281122				AT5G62560		RING/U-box superfamily protein with ARM repeat domain		LOC_Os09g21740.1
GRMZM2G471304		-1.6								AT1G56150		SAUR-like auxin-responsive protein family		LOC_Os02g07110.1
GRMZM2G122810		-1.6				sterol methyltransferase1				AT5G13710	CPH,SMT1	sterol methyltransferase 1		LOC_Os07g10600.1
GRMZM2G445575		-1.6				hypothetical protein LOC100192007				AT5G10030	OBF4,TGA4	TGACG motif-binding factor 4		LOC_Os04g54474.1
GRMZM2G441325		-1.6				auxin response factor 23				AT2G33860	ARF3,ETT	Transcriptional factor B3 family protein / auxin-responsive factor AUX/IAA-related		LOC_Os05g43920.1
GRMZM2G097802		-1.6				amino acid permease				AT2G39130		Transmembrane amino acid transporter family protein		LOC_Os02g01100.2
GRMZM2G176340		-1.6				hypothetical protein LOC100191954		TUB		AT2G18280	AtTLP2,TLP2	tubby like protein 2		LOC_Os02g47640.1
GRMZM2G175362		-1.6				hypothetical protein LOC100280073				AT1G78880		Ubiquitin-specific protease family C19-related protein		LOC_Os08g13350.1
GRMZM2G158117	-2.1	-1.5	-3.11545	-3		SANT/MYB protein				AT4G39250	ATRL1,RL1,RSM2	RAD-like 1		LOC_Os05g49240.1
GRMZM5G803874	-1.8	-1.5	-1.87008	-2.3		catalytic activity				AT4G11570		Haloacid dehalogenase-like hydrolase (HAD) superfamily protein		LOC_Os04g47020.1
GRMZM2G040095	-2.6	-1.5		-2.2		lipoxygenase6
GRMZM2G020081		-1.5		-2.1		LOC100281433		Pseudo ARR-B		AT5G61380	APRR1,AtTOC1,PRR1,TOC1	CCT motif -containing response regulator protein		LOC_Os02g40510.1
GRMZM2G111224	-1.5	-1.5	-1.9722	-2		TSA: Zea mays contig31810, mRNA sequence				AT1G19110		inter-alpha-trypsin inhibitor heavy chain-related		LOC_Os07g42280.1
GRMZM2G103250	-2	-1.5	-2.33761	-2		TSA: Zea mays contig14444, mRNA sequence				AT4G30825		Tetratricopeptide repeat (TPR)-like superfamily protein		LOC_Os09g25550.1
GRMZM2G129513	-1.4	-1.5	-1.30237	-1.9		malate dehydrogenase6				AT5G58330		lactate/malate dehydrogenase family protein		LOC_Os08g44810.1
GRMZM2G149216	-1.6	-1.5	-2.04858	-1.9		LHT1				AT5G40780	LHT1	lysine histidine transporter 1		LOC_Os08g03350.1
GRMZM2G012758	-1.9	-1.5	-1.83244	-1.8		LOC100280934				AT4G34480		O-Glycosyl hydrolases family 17 protein		LOC_Os03g12620.1
GRMZM2G091560	-1.6	-1.5	-2.2912	-1.6		translation				AT1G48520	GATB	GLU-ADT subunit B		LOC_Os11g34210.1
GRMZM5G892758	-2.3	-1.5	-3.51804	-1.6		TSA: Zea mays contig04091, mRNA sequence				AT1G15290		Tetratricopeptide repeat (TPR)-like superfamily protein		LOC_Os04g55230.1
GRMZM2G015889	-1.2	-1.5	-1.1994			serine/threonine-protein kinase NAK				AT5G13160	PBS1	Protein kinase superfamily protein		LOC_Os04g32310.1
GRMZM2G007188	-1.4	-1.5	-1.20525			ADP-ribosylation factor-like protein 8B				AT3G49870	ARLA1C,ATARLA1C	ADP-ribosylation factor-like A1C		LOC_Os03g10370.1
GRMZM2G146446	-1.3	-1.5	-1.2724			Full-length cDNA clone ZM_BFb0052C18				AT2G46060		transmembrane protein-related		LOC_Os10g30910.1
GRMZM2G036113		-1.5	-1.29885			hypothetical protein LOC100381628				AT3G56960	PIP5K4	phosphatidyl inositol monophosphate 5 kinase 4		LOC_Os07g46490.1
GRMZM2G147849		-1.5	-1.30876			endo-1,4-beta-glucanase Cel1				AT5G49720	ATGH9A1,DEC,GH9A1,IRX2,KOR,KOR1,RSW2,TSD1	glycosyl hydrolase 9A1		LOC_Os03g52630.1
GRMZM5G874163	-1.2	-1.5	-1.31922			DNA binding				AT2G33860	ARF3,ETT	Transcriptional factor B3 family protein / auxin-responsive factor AUX/IAA-related		LOC_Os01g54990.1
GRMZM2G120163		-1.5	-1.33026			hypothetical protein LOC100384841				AT5G14880		Potassium transporter family protein		LOC_Os06g15910.1
GRMZM2G061912		-1.5	-1.36064			LOC100282310				AT1G07410	ATRAB-A2B,ATRABA2B,RAB-A2B,RABA2b	RAB GTPase homolog A2B		LOC_Os05g20050.1
GRMZM5G806622		-1.5	-1.40064			hypothetical protein LOC100276764				AT3G08640		Protein of unknown function (DUF3411)		LOC_Os01g59740.1
GRMZM2G134389	-1.5	-1.5	-1.40962			tyrosine specific protein phosphatase family protein				AT1G05000		Phosphotyrosine protein phosphatases superfamily protein		LOC_Os06g10650.1
GRMZM2G179907	-1.6	-1.5	-1.43309			hypothetical protein LOC100277561				AT1G12330				LOC_Os03g14500.1
GRMZM2G085392		-1.5	-1.4483			early nodulin-like protein 3				AT3G20570	AtENODL9,ENODL9	early nodulin-like protein 9		LOC_Os01g57880.1
GRMZM2G394528		-1.5	-1.45068			Hypothetical protein LOC100276608				AT4G00750		S-adenosyl-L-methionine-dependent methyltransferases superfamily protein		LOC_Os02g45310.1
GRMZM2G081589	-1.4	-1.5	-1.45552			hypothetical protein LOC100273131				AT2G02860	ATSUC3,ATSUT2,SUC3,SUT2	sucrose transporter 2		LOC_Os02g36700.1
GRMZM5G886363		-1.5	-1.45729			Transcribed locus, strongly similar to NP_001146057.1 hypothetical protein LOC100279588 [Zea mays]				AT2G35110	GRL,NAP1,NAPP	transcription activators		LOC_Os08g43130.1
GRMZM2G095892	-1.6	-1.5	-1.46771			Putative uncharacterized protein				AT4G23060	IQD22	IQ-domain 22		LOC_Os04g48160.1
GRMZM2G168143	-1.6	-1.5	-1.48116			ferredoxin				AT1G20020	ATLFNR2,FNR2	ferredoxin-NADP(+)-oxidoreductase 2		LOC_Os06g01850.1
AC207628.4_FG011		-1.5	-1.49876							AT1G14380.1	IQD28	IQ-domain 28		LOC_Os01g51840.1
GRMZM2G152477	-2.8	-1.5	-1.56441			LOC100272649				AT1G25230		Calcineurin-like metallo-phosphoesterase superfamily protein		LOC_Os03g13540.1
GRMZM2G121948	-1.3	-1.5	-1.58772			hypothetical protein LOC100193449				AT5G53530	VPS26A	vacuolar protein sorting 26A		LOC_Os11g41130.2
GRMZM2G159732	-1	-1.5	-1.59156			hypothetical protein LOC100381633				AT3G01930		Major facilitator superfamily protein		LOC_Os04g31924.1
GRMZM2G108565		-1.5	-1.64103							AT3G16010		Pentatricopeptide repeat (PPR-like) superfamily protein		LOC_Os02g16650.1
GRMZM2G164340	-2.2	-1.5	-1.65908			nitrilase-associated protein				AT1G69230	SP1L2	SPIRAL1-like2		LOC_Os04g48870.1
GRMZM2G420469	-1.3	-1.5	-1.66366			Putative uncharacterized protein				AT3G15470		Transducin/WD40 repeat-like superfamily protein		LOC_Os02g42590.1
GRMZM2G009030		-1.5	-1.66927			hypothetical protein LOC100274470				AT1G74030	ENO1	enolase 1		LOC_Os09g20820.1
GRMZM2G074377	-1.1	-1.5	-1.67659			hypothetical protein LOC100382224				AT5G25590		Protein of unknown function (DUF630 and DUF632)		LOC_Os05g32760.1
GRMZM5G895554	-1.9	-1.5	-1.69246			sulfate assimilation				AT2G14750	AKN1,APK,APK1,ATAKN1	APS kinase		LOC_Os11g41650.2
GRMZM2G156816		-1.5	-1.71528			LOC100279982				AT5G48930	HCT	hydroxycinnamoyl-CoA shikimate/quinate hydroxycinnamoyl transferase		LOC_Os08g43040.1
GRMZM2G027862		-1.5	-1.72454			TSA: Zea mays contig57356, mRNA sequence				AT2G22125	CSI1	binding		LOC_Os06g11990.1
GRMZM2G079256		-1.5	-1.77428			hypothetical protein LOC100192829				AT2G05990	ENR1,MOD1	NAD(P)-binding Rossmann-fold superfamily protein		LOC_Os09g10600.1
GRMZM2G122618		-1.5	-1.77753			hypothetical protein LOC100192570				AT2G28315		Nucleotide/sugar transporter family protein		LOC_Os02g41780.1
GRMZM2G150004	-1.3	-1.5	-1.80281							AT3G17900				LOC_Os03g05812.3
GRMZM2G099583		-1.5	-1.83459			hypothetical protein LOC100217082				AT4G39790		Protein of unknown function (DUF630 and DUF632)		LOC_Os05g16640.1
GRMZM2G028353	-1	-1.5	-1.85261			hypothetical protein LOC100280232				AT5G64740	CESA6,E112,IXR2,PRC1	cellulose synthase 6		LOC_Os07g24190.1
GRMZM2G177570	-1.3	-1.5	-1.87438			protein kinase activity				AT1G72300		Leucine-rich receptor-like protein kinase family protein		LOC_Os06g47650.1
GRMZM2G010011		-1.5	-1.91217			hypothetical protein LOC100279394				AT4G15080		DHHC-type zinc finger family protein		LOC_Os04g49560.1
GRMZM2G127080	-1.6	-1.5	-1.93267			hypothetical protein LOC100382294				AT1G80530		Major facilitator superfamily protein		LOC_Os06g08110.1
GRMZM2G026309	-1.3	-1.5	-1.93941			cysteine-type endopeptidase activity				AT4G27060	CN,SPR2,TOR1	ARM repeat superfamily protein		LOC_Os07g33630.1
GRMZM2G123440		-1.5	-2.00012			hypothetical protein LOC100276048				AT5G62550				LOC_Os06g38960.2
GRMZM2G077420	-1.4	-1.5	-2.02011			Transcribed locus, weakly similar to XP_002265869.1 PREDICTED: hypothetical protein [Vitis vinifera]				AT3G09040		Pentatricopeptide repeat (PPR) superfamily protein		LOC_Os04g43430.1
GRMZM2G004748		-1.5	-2.03595			hypothetical protein LOC100191944				AT4G25960	PGP2	P-glycoprotein 2		LOC_Os02g46680.1
GRMZM2G058089	-1.3	-1.5	-2.06949			LOC100193394				AT5G26910				LOC_Os03g61620.1
GRMZM2G148811	-1.3	-1.5	-2.07287			hypothetical protein LOC100273611				AT3G18500		DNAse I-like superfamily protein		LOC_Os06g15410.1
GRMZM2G106917	-1.4	-1.5	-2.0934			Putative uncharacterized protein				AT2G21385				LOC_Os09g36130.1
GRMZM2G150030		-1.5	-2.17962			hypothetical protein LOC100383543				AT3G53700	MEE40	Pentatricopeptide repeat (PPR) superfamily protein		LOC_Os08g01640.1
GRMZM2G050435		-1.5	-2.19566			TSA: Zea mays cultivar W22 CL654Contig1.betc, mRNA sequence				AT2G03810		18S pre-ribosomal assembly protein gar2-related		LOC_Os04g39240.1
GRMZM2G322506		-1.5	-2.23209			nucleotide binding				AT1G65810		P-loop containing nucleoside triphosphate hydrolases superfamily protein		LOC_Os04g49320.1
GRMZM2G101874	-1.8	-1.5	-2.26343			microtubule-associated protein MAP65-1a				AT4G26760	MAP65-2	microtubule-associated protein 65-2		LOC_Os06g20370.1
GRMZM2G083972	-2.4	-1.5	-2.28329							AT1G74160				LOC_Os07g01860.1
GRMZM2G007848		-1.5	-2.28837			protein kinase activity				AT2G42880	ATMPK20,MPK20	MAP kinase 20		LOC_Os01g47530.1
GRMZM2G056236	-1.8	-1.5	-2.29311			LOC100273516				AT2G45110	ATEXPB4,ATHEXP BETA 1.1,EXPB4	expansin B4		LOC_Os02g44108.1
GRMZM2G112659	-1.4	-1.5	-2.29852			hypothetical protein LOC100191407				AT2G42580	TTL3,VIT	tetratricopetide-repeat thioredoxin-like 3		LOC_Os05g11990.1
GRMZM2G059212	-1.6	-1.5	-2.31879			1,3-beta-glucan synthase complex				AT5G13000	ATGSL12,gsl12	glucan synthase-like 12		LOC_Os06g51270.1
GRMZM2G078275	-1.5	-1.5	-2.34058			nucleic acid binding				AT4G14790	ATSUV3,EDA15	ATP-dependent RNA helicase, mitochondrial (SUV3)
GRMZM2G365319		-1.5	-2.3975			ATP binding protein				AT5G57670		Protein kinase superfamily protein		LOC_Os08g15060.1
GRMZM2G158972	-2	-1.5	-2.49989			inositol or phosphatidylinositol phosphatase activity				AT1G71710		DNAse I-like superfamily protein		LOC_Os01g51890.1
GRMZM2G049322	-1.4	-1.5	-2.56567			TSA: Zea mays contig06804, mRNA sequence				AT3G53540				LOC_Os03g17210.1
GRMZM2G349875	-1.6	-1.5	-2.64295			protein kinase activity				AT1G66150	TMK1	transmembrane kinase 1		LOC_Os11g26130.1
GRMZM2G061419		-1.5	-2.67047			hypothetical protein LOC100383406				AT2G19880		Nucleotide-diphospho-sugar transferases superfamily protein		LOC_Os01g67870.1
GRMZM2G146819	-2.3	-1.5	-2.74986			Hypothetical protein LOC100193001				AT3G62010				LOC_Os03g38970.1
AC233887.1_FG006	-2.4	-1.5	-2.90506							AT3G11670.1	DGD1	UDP-Glycosyltransferase superfamily protein		LOC_Os04g34000.1
GRMZM2G077596	-1.5	-1.5	-2.91294			TSA: Zea mays contig11563, mRNA sequence				AT5G43310		COP1-interacting protein-related		LOC_Os03g64320.1
GRMZM2G042181	-1.5	-1.5	-3.01494			protein binding protein				AT4G06744		Leucine-rich repeat (LRR) family protein		LOC_Os02g40260.1
GRMZM2G096753	-1.8	-1.5	-3.16581			protein kinase activity				AT1G08650	ATPPCK1,PPCK1	phosphoenolpyruvate carboxylase kinase 1		LOC_Os02g41580.1
GRMZM2G432774	-1.5	-1.5	-3.19764			hormone activity				AT5G07740		actin binding		LOC_Os07g40520.1
GRMZM2G013255	-1	-1.5				alpha-L-fucosidase 1				AT2G28100	ATFUC1,FUC1	alpha-L-fucosidase 1		LOC_Os09g34920.1
GRMZM2G169562	-1	-1.5				triglyceride lipase activity				AT4G16070		Mono-/di-acylglycerol lipase, N-terminal;Lipase, class 3		LOC_Os11g43760.1
GRMZM2G036916	-1	-1.5				hypothetical protein LOC100383367				AT1G60160		Potassium transporter family protein		LOC_Os09g21000.1
GRMZM5G893392	-1	-1.5				hypothetical protein LOC100275888				AT4G19100		Protein of unknown function (DUF3464)		LOC_Os02g53350.1
AC217293.3_FG007	-1	-1.5								AT1G21270.1	WAK2	wall-associated kinase 2		LOC_Os10g06090.1
GRMZM2G015212	-1.1	-1.5				Clone 224832 mRNA sequence
GRMZM2G414537	-1.1	-1.5				hypothetical protein LOC100382921				AT3G25805				LOC_Os04g38850.1
GRMZM2G128651	-1.1	-1.5				Full-length cDNA clone ZM_BFb0334L08				AT5G64460		Phosphoglycerate mutase family protein		LOC_Os04g01230.1
GRMZM2G141922	-1.1	-1.5				hypothetical protein LOC100191406				AT2G28840	XBAT31	XB3 ortholog 1 in Arabidopsis thaliana		LOC_Os05g02130.1
GRMZM2G113205	-1.2	-1.5				hypothetical protein LOC100191635				AT2G03420				LOC_Os03g11230.1
GRMZM5G832281	-1.2	-1.5				hypothetical protein LOC100274599
GRMZM2G151955	-1.2	-1.5				protein kinase activity				AT4G30520		Leucine-rich repeat protein kinase family protein		LOC_Os08g34380.1
GRMZM2G384755	-1.2	-1.5				hypothetical protein LOC100191473				AT4G21380	ARK3,RK3	receptor kinase 3		LOC_Os05g42210.1
GRMZM2G103873	-1.3	-1.5				Full-length cDNA clone ZM_BFb0066E04								LOC_Os10g21860.1
GRMZM2G177928	-1.4	-1.5				strictosidine synthase				AT5G22020		Calcium-dependent phosphotriesterase superfamily protein		LOC_Os03g53950.1
GRMZM2G056093	-1.5	-1.5				hypothetical protein LOC100277061				AT5G20190		Tetratricopeptide repeat (TPR)-like superfamily protein		LOC_Os06g40440.1
GRMZM2G158131	-1.6	-1.5				hypothetical protein LOC100277030				AT4G00895		ATPase, F1 complex, OSCP/delta subunit protein		LOC_Os06g50070.1
GRMZM2G422750	-1.6	-1.5				product:chalcone synthase				AT5G13930	ATCHS,CHS,TT4	Chalcone and stilbene synthase family protein		LOC_Os11g32650.1
GRMZM2G031065	-1.7	-1.5				metabolic process				AT1G47480		alpha/beta-Hydrolases superfamily protein		LOC_Os08g37040.1
GRMZM2G137108	-2.1	-1.5				NOD26-like membrane intrinsic protein2				AT5G37820	NIP4;2,NLM5	NOD26-like intrinsic protein 4;2		LOC_Os06g12310.1
GRMZM2G075794		-1.5				Clone 290202 mRNA sequence				AT4G04745				LOC_Os07g33320.1
GRMZM2G146422		-1.5				Hypothetical protein LOC100274622
GRMZM2G163407		-1.5				hypothetical protein LOC100276610
GRMZM2G171028		-1.5				hypothetical protein LOC100191315				AT1G32120				LOC_Os11g40570.1
GRMZM2G342243		-1.5				LOC100282984				AT1G45688				LOC_Os06g06780.1
GRMZM5G844316		-1.5				Transcribed locus
[truncated: 6,188 more rows]

## Sheet: 72h Sub vs Control
FC=sub/control; p< 0.001	B73	B97	Mo18W	M162W		Maize Annotation		TF Family		Arabidopsis Best Hit				Rice Best Hit
GRMZM5G870571				-8		hypothetical protein LOC100194120				AT2G03220	ATFT1,ATFUT1,FT1,MUR2	fucosyltransferase 1		LOC_Os06g10950.1
AC203294.3_FG012				-7.5						AT3G56710.1	SIB1	sigma factor binding protein 1		LOC_Os05g32460.1
GRMZM2G390124				-7.2		magnesium ion binding				AT4G16730	TPS02	terpene synthase 02		LOC_Os03g24680.1
GRMZM5G862594				-6.9		Clone 452675 mRNA sequence
GRMZM2G108077				-6.8		peroxidase activity				AT1G71695		Peroxidase superfamily protein		LOC_Os04g59260.1
GRMZM2G703281				-6.7		intracellular				AT2G41940	ZFP8	zinc finger protein 8		LOC_Os09g27320.1
GRMZM5G852794				-6.4		Clone 706472 mRNA sequence
GRMZM2G063464				-6.3		lipid metabolic process				AT5G37690		SGNH hydrolase-type esterase superfamily protein		LOC_Os06g14630.1
GRMZM2G319445				-6.3		magnesium ion binding				AT1G70080		Terpenoid cyclases/Protein prenyltransferases superfamily protein		LOC_Os03g24640.1
GRMZM2G069737				-6.1		hypothetical protein LOC100279938								LOC_Os05g40580.1
GRMZM2G456401				-6						AT3G02645		Plant protein of unknown function (DUF247)		LOC_Os03g39520.1
GRMZM2G034963				-6		hypothetical protein LOC100278899 (LOC100278899), mRNA				AT5G25840		Protein of unknown function (DUF1677)		LOC_Os01g10260.1
GRMZM2G121957				-4.9		Clone 343344 mRNA sequence				AT1G06320				LOC_Os03g19540.1
GRMZM2G009633				-4.5		Full-length cDNA clone ZM_BFc0037I15				AT1G08080	ACA7,ATACA7	alpha carbonic anhydrase 7		LOC_Os08g36630.1
GRMZM2G163008				-4.4		hypothetical protein LOC100273604				AT1G14290	SBH2	sphingoid base hydroxylase 2		LOC_Os06g22490.1
GRMZM2G340224				-4.3		protein kinase activity				AT5G12180	CPK17	calcium-dependent protein kinase 17		LOC_Os01g59360.1
GRMZM2G301647				-4.3		protein kinase activity				AT2G24370		Protein kinase protein with adenine nucleotide alpha hydrolases-like domain		LOC_Os02g54590.1
GRMZM2G408458				-4.1		methyltransferase activity				AT4G35150		O-methyltransferase family protein		LOC_Os12g25450.1
GRMZM2G342807				-4.1		Transcribed locus, moderately similar to NP_001049016.1 Os03g0157700 [Oryza sativa Japonica Group]				AT2G21720		Plant protein of unknown function (DUF639)		LOC_Os03g06180.1
GRMZM2G463622				-4.1						AT5G01510	RUS5	Protein of unknown function, DUF647		LOC_Os05g51830.1
GRMZM2G058149				-4		hypothetical protein LOC100279482				AT4G16820	PLA-I{beta]2	alpha/beta-Hydrolases superfamily protein		LOC_Os10g41270.1
GRMZM2G364145				-3.9		Transcribed locus
GRMZM2G115630				-3.8		catalytic activity				AT5G65940	CHY1	beta-hydroxyisobutyryl-CoA hydrolase 1		LOC_Os12g16350.1
GRMZM2G428233				-3.8						AT4G14740		Plant protein of unknown function (DUF828) with plant pleckstrin homology-like region		LOC_Os10g41870.1
GRMZM2G464382				-3.6		hypothetical protein LOC100191404				AT5G03540	ATEXO70A1,EXO70A1	exocyst subunit exo70 family protein A1		LOC_Os11g05880.1
GRMZM2G115065				-3.6		nucleotide binding				AT3G47000		Glycosyl hydrolase family protein		LOC_Os05g37700.1
GRMZM2G109252				-3.6		hypothetical protein LOC100383907		HB		AT4G00730	AHDP,ANL2	Homeobox-leucine zipper family protein / lipid-binding START domain-containing protein		LOC_Os09g35760.1
GRMZM2G140293				-3.5						AT1G16770				LOC_Os02g04780.1
GRMZM2G171279				-3.4		potassium channel5				AT2G26650	AKT1,ATAKT1,KT1	K+ transporter 1		LOC_Os01g45990.1
GRMZM2G001035				-3.4						AT3G43660		Vacuolar iron transporter (VIT) family protein		LOC_Os04g45520.1
GRMZM2G376809				-3.2										LOC_Os06g09620.1
GRMZM2G097505				-3.2		potassium ion transport				AT4G13420	ATHAK5,HAK5	high affinity K+ transporter 5		LOC_Os03g37840.1
GRMZM2G338721				-3.2		hypothetical protein LOC100278899				AT5G25840		Protein of unknown function (DUF1677)		LOC_Os01g10260.1
GRMZM2G018988				-3.1		protein binding				AT2G46240	ATBAG6,BAG6	BCL-2-associated athanogene 6		LOC_Os11g31060.1
GRMZM2G086730				-3.1		nucleotide binding				AT1G02520	PGP11	P-glycoprotein 11		LOC_Os01g35030.1
GRMZM2G307404				-3		type I hypersensitivity
GRMZM2G143871				-3		methyltransferase activity				AT1G19640	JMT	jasmonic acid carboxyl methyltransferase		LOC_Os02g48770.1
GRMZM2G379490				-3						AT1G20470		SAUR-like auxin-responsive protein family		LOC_Os07g29310.1
GRMZM2G167998				-2.9						AT3G19430		late embryogenesis abundant protein-related / LEA protein-related		LOC_Os01g73720.1
GRMZM2G440005				-2.9		ZCN24				AT1G65480	FT	PEBP (phosphatidylethanolamine-binding protein) family protein		LOC_Os09g33850.1
GRMZM5G833406				-2.9		IAA-amino acid hydrolase ILR1-like 4				AT1G51760	IAR3,JR3	peptidase M20/M25/M40 family protein		LOC_Os01g51060.1
GRMZM2G148064				-2.9		pollen allergen Phl p 11				AT1G29140		Pollen Ole e 1 allergen and extensin family protein		LOC_Os06g36240.1
GRMZM2G166094				-2.8		hypothetical protein LOC100217214				AT4G37810				LOC_Os03g46930.1
GRMZM2G534888				-2.8
GRMZM2G077895				-2.8		Putative uncharacterized protein				AT4G16146		cAMP-regulated phosphoprotein 19-related protein		LOC_Os03g19220.2
GRMZM2G176216				-2.8		NADH dehydrogenase (ubiquinone) activity				ATCG01010		NADH-Ubiquinone oxidoreductase (complex I), chain 5 protein		LOC_Os10g21418.1
GRMZM2G141992				-2.7		Transcribed locus				AT4G01690	HEMG1,PPO1,PPOX	Flavin containing amine oxidoreductase family		LOC_Os01g18320.1
GRMZM2G046601				-2.7		glutamate-ammonia ligase activity				AT1G66200	ATGSR2,GSR2	glutamine synthase clone F11		LOC_Os03g12290.1
GRMZM2G398559				-2.7		protein kinase activity				AT4G22130	SRF8	STRUBBELIG-receptor family 8		LOC_Os02g04430.1
GRMZM2G110369				-2.6		iron ion binding				AT4G10490		2-oxoglutarate (2OG) and Fe(II)-dependent oxygenase superfamily protein		LOC_Os07g07410.2
GRMZM2G113631				-2.6						AT1G69900		Actin cross-linking protein		LOC_Os06g06580.1
GRMZM2G093246				-2.6		protein kinase activity				AT4G02410		Concanavalin A-like lectin protein kinase family protein		LOC_Os03g60810.1
GRMZM2G100709				-2.6		myb-like DNA-binding domain, SHAQKYF class family protein		G2-like		AT2G40260		Homeodomain-like superfamily protein		LOC_Os06g45890.1
GRMZM2G348125				-2.6		stress responsive protein (LOC100283176), mRNA				AT2G39050		hydroxyproline-rich glycoprotein family protein		LOC_Os07g48500.1
GRMZM2G018951				-2.6		hypothetical protein LOC100384084				AT1G55550		P-loop containing nucleoside triphosphate hydrolases superfamily protein		LOC_Os01g15540.1
GRMZM2G077612				-2.5						AT3G05858				LOC_Os02g37070.1
GRMZM2G149022				-2.5
GRMZM2G426243				-2.5										LOC_Os04g57970.1
GRMZM5G839518				-2.5		nucleus
GRMZM2G400005				-2.5						AT2G46240	ATBAG6,BAG6	BCL-2-associated athanogene 6
GRMZM2G070242				-2.5		integral to membrane				AT5G35160		Endomembrane protein 70 protein family		LOC_Os08g19160.1
GRMZM2G062559				-2.5		hypothetical protein LOC100383488				AT2G03200		Eukaryotic aspartyl protease family protein		LOC_Os04g37570.1
GRMZM2G478507				-2.5						AT5G48930	HCT	hydroxycinnamoyl-CoA shikimate/quinate hydroxycinnamoyl transferase		LOC_Os08g43040.1
GRMZM2G083156				-2.5						AT2G25680	MOT1	molybdate transporter 1		LOC_Os08g01120.1
GRMZM5G836977				-2.5		lipid metabolic process				AT3G54950	PLA IIIA,PLP7	patatin-like protein 6		LOC_Os12g41720.1
AC217811.3_FG003				-2.5						AT1G43710.1	emb1075	Pyridoxal phosphate (PLP)-dependent transferases superfamily protein		LOC_Os02g33710.1
GRMZM2G010034				-2.4		hypothetical protein LOC100277758				AT1G62250				LOC_Os03g53300.1
GRMZM2G099989				-2.4		Clone 1547268 mRNA sequence
GRMZM5G848747				-2.4		aspartic proteinase nepenthesin-2				AT2G03200		Eukaryotic aspartyl protease family protein		LOC_Os08g36530.1
GRMZM5G816240				-2.4						AT2G17030		F-box family protein with a domain of unknown function (DUF295)		LOC_Os03g51090.1
AC194457.3_FG001				-2.4						AT4G16480.1	ATINT4,INT4	inositol transporter 4		LOC_Os04g43210.1
GRMZM2G370863				-2.4		Transcribed locus, moderately similar to NP_001151712.1 mini zinc finger 3 [Zea mays]				AT3G28917	MIF2	mini zinc finger 2		LOC_Os09g29130.1
GRMZM2G143599				-2.4		mps one binder kinase activator-like 1A				AT5G45550		Mob1/phocein family protein		LOC_Os10g25674.1
GRMZM2G038303				-2.4		nuclear transcription factor Y subunit A-3		CCAAT		AT1G72830	ATHAP2C,HAP2C,NF-YA3	nuclear factor Y, subunit A3		LOC_Os07g41720.1
GRMZM2G077964				-2.4		hypothetical protein LOC100278185				AT3G01311		Protein of unknown function (DUF569)		LOC_Os06g06680.1
GRMZM2G344977				-2.4		TSA: Zea mays contig60487, mRNA sequence				AT3G26670		Protein of unknown function (DUF803)		LOC_Os02g31874.1
GRMZM2G358076				-2.4		TSA: Zea mays contig38606, mRNA sequence				AT3G13230		RNA-binding KH domain-containing protein		LOC_Os03g02420.1
GRMZM2G064715				-2.3						AT5G41980				LOC_Os11g36920.1
GRMZM2G176197				-2.3						AT2G21080				LOC_Os08g41000.1
GRMZM2G430411				-2.3		hypothetical protein LOC100275876								LOC_Os02g36730.1
GRMZM2G114639				-2.3		Hypothetical protein LOC100276975				AT2G47270		sequence-specific DNA binding transcription factors;transcription regulators		LOC_Os08g34510.1
GRMZM2G088356				-2.3		LOC100279792				AT3G24460		Serinc-domain containing serine and sphingolipid biosynthesis protein		LOC_Os01g08460.1
GRMZM2G132847				-2.3		catalytic activity				AT1G68720	ATTADA,TADA	tRNA arginine adenosine deaminase		LOC_Os06g29430.1
GRMZM2G105140				-2.3		transcription factor activity		WRKY		AT4G01250	AtWRKY22,WRKY22	WRKY family transcription factor		LOC_Os01g43550.2
GRMZM2G127841				-2.2		hypothetical protein LOC100279367
GRMZM2G546097				-2.2
GRMZM5G881349				-2.2		Clone 1430927 mRNA sequence
GRMZM2G015692				-2.2		hydrolase activity				AT5G20060		alpha/beta-Hydrolases superfamily protein		LOC_Os01g42690.2
GRMZM2G122846				-2.2		transcription factor activity		bZIP		AT3G30530	ATBZIP42,bZIP42	basic leucine-zipper 42		LOC_Os02g49560.1
GRMZM2G154946				-2.2		nucleic acid binding				AT1G05490	chr31	chromatin remodeling 31		ChrUn.fgenesh.mRNA.85
AF546187.1_FG011				-2.2						AT3G28740.1	CYP81D1	Cytochrome P450 superfamily protein		LOC_Os12g39300.1
GRMZM2G305146				-2.2		membrane				AT5G62220	ATGT18,GT18	glycosyltransferase 18		LOC_Os06g23420.1
GRMZM5G827496				-2.2		hypothetical protein LOC100274435				AT1G68570		Major facilitator superfamily protein		LOC_Os05g33960.1
GRMZM2G122816				-2.2		peroxidase activity				AT4G26010		Peroxidase superfamily protein		LOC_Os03g05770.1
GRMZM2G083732				-2.1		protein binding				AT1G12650				LOC_Os09g35670.1
GRMZM2G115707				-2.1		Clone 1462343 mRNA sequence
GRMZM2G308666				-2.1		hypothetical protein LOC100382263				AT3G48310	CYP71A22	cytochrome P450, family 71, subfamily A, polypeptide 22		LOC_Os08g01510.1
GRMZM2G080116				-2.1		hypothetical protein LOC100216769				AT5G20110		Dynein light chain type 1 family protein		LOC_Os01g37490.1
AC234155.1_FG002				-2.1						AT3G04030.3		Homeodomain-like superfamily protein		LOC_Os05g40960.1
AC210013.4_FG005				-2.1						AT5G19040.1	ATIPT5,IPT5	isopentenyltransferase 5		LOC_Os03g59570.1
GRMZM2G459824				-2.1		protein kinase activity				AT2G30040	MAPKKK14	mitogen-activated protein kinase kinase kinase 14		LOC_Os03g18170.1
GRMZM2G331105				-2.1		nucleotide binding				AT4G17140		pleckstrin homology (PH) domain-containing protein		LOC_Os02g27110.1
GRMZM2G088132				-2.1		mitochondrial outer membrane				AT3G01280	ATVDAC1,VDAC1	voltage dependent anion channel 1		LOC_Os05g45950.1
GRMZM2G096372				-2		defense response
GRMZM2G107299				-2		hypothetical protein LOC100272468								LOC_Os04g38920.1
GRMZM2G128800				-2		zinc finger, C3HC4 type family protein								LOC_Os04g41080.1
GRMZM2G555972				-2		Clone 296877 mRNA sequence
GRMZM2G704020				-2
GRMZM2G463471				-2		actin-depolymerizing factor				AT4G25590	ADF7	actin depolymerizing factor 7		LOC_Os02g44470.1
GRMZM2G131575				-2		plasma membrane				AT4G09650	ATPD	ATP synthase delta-subunit gene		LOC_Os03g52660.1
GRMZM2G134735				-2		nucleus		bHLH		AT5G67060	HEC1	basic helix-loop-helix (bHLH) DNA-binding superfamily protein		LOC_Os08g36740.1
GRMZM2G075161				-2		monooxygenase activity				AT3G48280	CYP71A25	cytochrome P450, family 71, subfamily A, polypeptide 25		LOC_Os01g12760.1
GRMZM2G396076				-2						AT1G19025		DNA repair metallo-beta-lactamase family protein		LOC_Os08g01630.1
GRMZM2G423567				-2		inositol or phosphatidylinositol phosphatase activity				AT2G43900		Endonuclease/exonuclease/phosphatase family protein		LOC_Os09g32440.1
GRMZM2G050364				-2		pepsin A				AT3G12700		Eukaryotic aspartyl protease family protein		LOC_Os05g51750.1
AC187157.4_FG005				-2						AT1G52150.1	ATHB-15,ATHB15,CNA,ICU4	Homeobox-leucine zipper family protein / lipid-binding START domain-containing protein		LOC_Os03g43930.2
GRMZM2G410766				-2		stress responsive protein				AT2G39050		hydroxyproline-rich glycoprotein family protein		LOC_Os07g48500.1
GRMZM5G883417				-2		acyl-desaturase				AT3G02620		Plant stearoyl-acyl-carrier-protein desaturase family protein		LOC_Os03g30950.1
GRMZM2G043069				-2		protein kinase activity				AT3G20530		Protein kinase superfamily protein		LOC_Os05g41950.1
GRMZM2G097457				-2		catalytic activity				AT4G15530	PPDK	pyruvate orthophosphate dikinase		LOC_Os05g33570.1
GRMZM2G092198				-2		Pentatricopeptide repeat protein-like mRNA, complete sequence				AT3G49730		Tetratricopeptide repeat (TPR)-like superfamily protein		LOC_Os03g51840.1
GRMZM2G060993				-2		hypothetical protein LOC100279546				AT3G16520	UGT88A1	UDP-glucosyl transferase 88A1		LOC_Os05g45180.1
GRMZM2G421126				-1.9		hypothetical protein LOC100274299				AT4G19970				LOC_Os03g63280.1
GRMZM2G473679				-1.9
AC217887.3_FG003				-1.9						AT3G62690.1	ATL5	AtL5		LOC_Os03g28040.1
GRMZM2G077015				-1.9		hydrolase activity, hydrolyzing O-glycosyl compounds				AT2G44450	BGLU15	beta glucosidase 15		LOC_Os06g21570.1
GRMZM2G100020				-1.9		Clone 1446633 mRNA sequence				AT1G31880	BRX,NLM9	DZC (Disease resistance/zinc finger/chromosome condensation-like region) domain containing protein		LOC_Os03g63650.1
GRMZM2G703565				-1.9		nucleic acid binding				AT1G56500		haloacid dehalogenase-like hydrolase family protein		LOC_Os03g19760.2
GRMZM2G107211				-1.9		anthranilate N-benzoyltransferase protein 1				AT5G48930	HCT	hydroxycinnamoyl-CoA shikimate/quinate hydroxycinnamoyl transferase		LOC_Os08g43040.1
GRMZM2G093313				-1.9		ion channel activity				AT5G46240	KAT1	potassium channel in Arabidopsis thaliana 1		LOC_Os01g11250.1
GRMZM2G052239				-1.9		ANAC030		NAC		AT1G71930	ANAC030,VND7	vascular related NAC-domain protein 7		LOC_Os08g01330.1
GRMZM2G438438				-1.9		hypothetical protein LOC100279540				AT1G69600	ATHB29,ZFHD1	zinc finger homeodomain 1		LOC_Os09g24820.1
GRMZM2G027056				-1.8		Transcribed locus, moderately similar to XP_002448628.1 hypothetical protein SORBIDRAFT_06g030470 [Sorghum bicolor]				AT1G72270				LOC_Os04g55130.1
GRMZM2G122584				-1.8		TSA: Zea mays contig36792, mRNA sequence				AT1G51100				LOC_Os01g48500.1
GRMZM2G700655				-1.8										LOC_Os01g12890.1
GRMZM5G895554				-1.8		sulfate assimilation				AT2G14750	AKN1,APK,APK1,ATAKN1	APS kinase		LOC_Os11g41650.2
GRMZM2G176778				-1.8						AT1G03350		BSD domain-containing protein		LOC_Os07g45310.1
GRMZM2G435393				-1.8		catalytic activity				AT5G13930	ATCHS,CHS,TT4	Chalcone and stilbene synthase family protein		LOC_Os07g17010.1
GRMZM2G026715				-1.8		hormone activity				AT1G33340		ENTH/ANTH/VHS superfamily protein		LOC_Os11g14000.1
GRMZM5G823824				-1.8		hypothetical protein LOC100273795				AT2G17030		F-box family protein with a domain of unknown function (DUF295)		LOC_Os03g51090.1
GRMZM2G120449				-1.8		erg28 like protein				AT1G10030	ERG28	homolog of yeast ergosterol28		LOC_Os12g43670.1
GRMZM2G093323				-1.8		nucleotide sugar translocator BT2A				AT4G32400	ATBT1,EMB104,EMB42,SHS1	Mitochondrial substrate carrier family protein		LOC_Os05g07900.1
GRMZM5G862467				-1.8		hypothetical protein LOC100384341				AT5G45550		Mob1/phocein family protein		LOC_Os10g25674.1
GRMZM5G828229				-1.8		oxidoreductase activity				AT1G63940	MDAR6	monodehydroascorbate reductase 6		LOC_Os08g05570.3
GRMZM2G005984				-1.8		photosystem II 11 kD protein				AT1G03600	PSB27	photosystem II family protein		LOC_Os03g21560.1
GRMZM2G047409				-1.8		electron carrier activity				AT1G54500		Rubredoxin-like superfamily protein		LOC_Os08g23410.1
GRMZM2G000254				-1.7		hypothetical protein LOC100216645								LOC_Os05g25620.1
GRMZM2G006325				-1.7		Clone 1705359 mRNA sequence
GRMZM2G041645				-1.7		voltage-gated chloride channel activity				AT4G28100				LOC_Os07g37156.1
GRMZM2G148404				-1.7		LOC100277500				AT3G11600				LOC_Os12g06130.1
GRMZM2G162451				-1.7		DNA binding				AT3G12345				LOC_Os06g28950.1
GRMZM2G169391				-1.7										LOC_Os01g64250.1
GRMZM2G347226				-1.7		protein kinase activity				AT4G09570	ATCPK4,CPK4	calcium-dependent protein kinase 4		LOC_Os12g07230.1
GRMZM2G351482				-1.7		metabolic process				AT5G23530	AtCXE18,CXE18	carboxyesterase 18		LOC_Os07g41590.1
GRMZM2G168016				-1.7		monooxygenase activity				AT1G19630	CYP722A1	cytochrome P450, family 722, subfamily A, polypeptide 1		LOC_Os03g61980.1
GRMZM2G166718				-1.7		TSA: Zea mays contig30752, mRNA sequence				AT3G02060		DEAD/DEAH box helicase, putative
GRMZM2G059801				-1.7		iron ion binding				AT2G42750		DNAJ heat shock N-terminal domain-containing protein		LOC_Os01g53020.1
GRMZM2G136236				-1.7		hypothetical protein LOC100217248				AT3G07880	SCN1	Immunoglobulin E-set superfamily protein		LOC_Os01g68540.1
GRMZM2G179677				-1.7		LOC542697		C2H2		AT3G50700	AtIDD2,IDD2	indeterminate(ID)-domain 2		LOC_Os08g44050.2
GRMZM2G072926				-1.7		DNA binding		AP2-EREBP		AT2G44940		Integrase-type DNA-binding superfamily protein		LOC_Os02g43970.1
GRMZM2G315902				-1.7		ATP binding				AT4G35520	ATMLH3,MLH3	MUTL protein homolog 3		LOC_Os09g37930.1
GRMZM2G478568				-1.7		nucleic acid binding				AT1G09240	ATNAS3,NAS3	nicotianamine synthase 3		LOC_Os07g48980.1
GRMZM2G102959				-1.7		oxidoreductase activity				AT2G15620	ATHNIR,NIR,NIR1	nitrite reductase 1		LOC_Os01g25484.2
GRMZM2G170896				-1.7		Transcribed locus, weakly similar to XP_001754449.1 predicted protein [Physcomitrella patens subsp. patens]				AT5G03800	EMB166,EMB175,emb1899	Pentatricopeptide repeat (PPR) superfamily protein		LOC_Os07g07620.1
GRMZM2G121309				-1.7		IAA7 - auxin-responsive Aux/IAA family member				AT3G16500	IAA26,PAP1	phytochrome-associated protein 1		LOC_Os02g13520.1
GRMZM2G313020				-1.7		cysteine-type endopeptidase activity				AT1G65810		P-loop containing nucleoside triphosphate hydrolases superfamily protein		LOC_Os04g49340.1
GRMZM2G020098				-1.7		hypothetical protein LOC100274029				AT1G03610		Protein of unknown function (DUF789)		LOC_Os10g35150.1
GRMZM2G057768				-1.7		Ca2+/calmodulin-dependent protein kinase phosphatase		DBP		AT2G33700		Protein phosphatase 2C family protein		LOC_Os10g39540.3
GRMZM2G135444				-1.7		LOC100273605				AT1G47380		Protein phosphatase 2C family protein		LOC_Os09g28560.1
GRMZM2G075431				-1.7		pseudouridine synthesis				AT4G21770		Pseudouridine synthase family protein		LOC_Os07g46600.1
GRMZM5G891282				-1.7		ribose-5-phosphate isomerase				AT2G01290	RPI2	ribose-5-phosphate isomerase 2		LOC_Os04g24140.1
GRMZM2G028543				-1.7		hypothetical protein LOC100273652				AT1G53820		RING/U-box superfamily protein		LOC_Os06g09310.1
GRMZM2G050774				-1.7		hypothetical protein LOC100274803				AT1G23980		RING/U-box superfamily protein		LOC_Os11g05300.1
GRMZM2G146004				-1.7		response to stress				AT4G02380	AtLEA5,SAG21	senescence-associated gene 21		LOC_Os01g21250.1
GRMZM2G040441				-1.7		barley mlo defense gene homolog2				AT2G33670	ATMLO5,MLO5	Seven transmembrane MLO family protein		LOC_Os10g39520.1
GRMZM2G109865				-1.7		TSA: Zea mays contig27712, mRNA sequence				AT1G47670		Transmembrane amino acid transporter family protein		LOC_Os04g47420.1
GRMZM2G090018				-1.6		hypothetical protein LOC100272586								LOC_Os10g21020.1
GRMZM2G362368				-1.6		hypothetical protein LOC100277330				AT2G33855				LOC_Os04g39950.1
GRMZM2G474462				-1.6						AT4G15790				LOC_Os07g47460.1
GRMZM2G539749				-1.6		hypothetical protein LOC100304137 (LOC100304137), mRNA
GRMZM2G106053				-1.6		hypothetical protein LOC100382661 (LOC100382661), mRNA				AT5G17670		alpha/beta-Hydrolases superfamily protein		LOC_Os02g03720.1
GRMZM2G016558				-1.6						AT1G03670		ankyrin repeat family protein		LOC_Os11g14570.1
GRMZM2G092604				-1.6		protein kinase activity				AT1G55610	BRL1	BRI1 like		LOC_Os09g12240.1
GRMZM2G020081				-1.6		LOC100281433		Orphans		AT5G61380	APRR1,AtTOC1,PRR1,TOC1	CCT motif -containing response regulator protein		LOC_Os02g40510.1
GRMZM2G346095				-1.6		catalytic activity				AT5G13930	ATCHS,CHS,TT4	Chalcone and stilbene synthase family protein		LOC_Os05g12240.1
GRMZM2G127421				-1.6		hypothetical protein LOC100191887				AT5G43860	ATCLH2,CLH2	chlorophyllase 2		LOC_Os10g28370.1
GRMZM2G111475				-1.6		ATP binding				AT5G49910	cpHsc70-2,CPHSC70-2EAT SHOCK PROTEIN 70-2,HSC70-7	chloroplast heat shock protein 70-2		LOC_Os05g23740.1
GRMZM2G162250				-1.6		hypothetical protein LOC100272467				AT5G19380	CLT1	CRT (chloroquine-resistance transporter)-like transporter 1		LOC_Os01g72570.1
GRMZM2G074317				-1.6		hypothetical protein LOC100272382				AT5G15410	ATCNGC2,CNGC2,DND1	Cyclic nucleotide-regulated ion channel family protein		LOC_Os03g55100.1
GRMZM2G038301				-1.6		hypothetical protein LOC100275725				AT1G49380		cytochrome c biogenesis protein family		LOC_Os03g55970.1
GRMZM2G481291				-1.6		F-box domain containing protein				AT5G67140		F-box/RNI-like superfamily protein		LOC_Os06g07000.1
GRMZM2G068963				-1.6		FK506 binding protein				AT1G18170		FKBP-like peptidyl-prolyl cis-trans isomerase family protein		LOC_Os03g50080.1
GRMZM2G105834				-1.6		DNA binding		HB		AT5G06710	HAT14	homeobox from Arabidopsis thaliana		LOC_Os03g12860.1
GRMZM2G308369				-1.6						AT3G14460		LRR and NB-ARC domains-containing disease resistance protein		LOC_Os01g25760.1
GRMZM2G168665				-1.6		Clone 210359 mRNA sequence		mTERF		AT2G36000		Mitochondrial transcription termination factor family protein		LOC_Os03g24590.1
GRMZM2G425136				-1.6		metabolic process				AT1G77090		Mog1/PsbP/DUF1795-like photosystem II reaction center PsbP family protein		LOC_Os12g08830.1
GRMZM2G302549				-1.6		DNA binding				AT4G18770	AtMYB98,MYB98	myb domain protein 98		LOC_Os06g06740.1
GRMZM5G874903				-1.6		ribose-5-phosphate isomerase				AT5G44520		NagB/RpiA/CoA transferase-like superfamily protein		LOC_Os03g56869.1
GRMZM5G825192				-1.6		nucleotide binding				AT3G14470		NB-ARC domain-containing disease resistance protein		LOC_Os09g15850.1
GRMZM2G362413				-1.6		catalytic activity				AT5G23230	NIC2	nicotinamidase 2		LOC_Os04g44420.1
GRMZM2G016084				-1.6		RNA binding				AT3G23700		Nucleic acid-binding proteins superfamily		LOC_Os03g62780.1
GRMZM2G089959				-1.6		Transcribed locus				AT5G57250		Pentatricopeptide repeat (PPR) superfamily protein		LOC_Os01g15840.1
GRMZM2G410623				-1.6		Clone 894716 mRNA sequence				AT4G13650		Pentatricopeptide repeat (PPR) superfamily protein		LOC_Os06g20870.1
GRMZM5G885392				-1.6		Transcribed locus, moderately similar to NP_001062297.1 Os08g0526300 [Oryza sativa Japonica Group]				AT4G22890	PGR5-LIKE A	PGR5-LIKE A		LOC_Os08g41460.1
GRMZM2G022997				-1.6		acid phosphatase activity				AT5G15070		Phosphoglycerate mutase-like family protein		LOC_Os03g48300.1
GRMZM2G025175				-1.6		LOC100192702				AT1G29140		Pollen Ole e 1 allergen and extensin family protein		LOC_Os06g36240.1
GRMZM2G072861				-1.6		catalytic activity				AT1G49630	ATPREP2,PREP2	presequence protease 2		LOC_Os02g52390.1
GRMZM2G410710				-1.6		prohibitin3				AT5G40770	ATPHB3,PHB3	prohibitin 3		LOC_Os02g37000.1
AC197047.3_FG001				-1.6						AT1G78020.1		Protein of unknown function (DUF581)		LOC_Os08g31510.1
GRMZM2G166692				-1.6		hypothetical protein LOC100272233				AT1G78020		Protein of unknown function (DUF581)		LOC_Os09g20240.1
GRMZM2G034385				-1.6		hypothetical protein LOC100217086				AT1G07090	LSH6	Protein of unknown function (DUF640)		LOC_Os10g33780.1
GRMZM2G130302				-1.6		hypothetical protein LOC100277681				AT5G51670		Protein of unknown function (DUF668)		LOC_Os03g64130.1
GRMZM2G148872				-1.6		hypothetical protein LOC100274129				AT5G20140		SOUL heme-binding family protein		LOC_Os06g39690.1
GRMZM2G044744				-1.6		starch synthase IV				AT4G18240	ATSS4,SS4,SSIV	starch synthase 4		LOC_Os05g45720.1
GRMZM2G057159				-1.6		hypothetical protein LOC100193256				AT4G10550		Subtilase family protein		LOC_Os02g17150.1
GRMZM2G089638				-1.6		galanin receptor activity		TCP		AT1G58100		TCP family transcription factor		LOC_Os12g07480.1
GRMZM2G328427				-1.6						AT3G29230		Tetratricopeptide repeat (TPR)-like superfamily protein		LOC_Os12g30620.1
GRMZM2G004006				-1.6		LOC100191743				AT4G24930		thylakoid lumenal 17.9 kDa protein, chloroplast		LOC_Os01g01280.1
AC177922.2_FG002				-1.5
AC210046.4_FG002				-1.5
AC232238.2_FG008				-1.5						AT3G54290.1				LOC_Os01g64250.1
GRMZM2G026654				-1.5		Putative uncharacterized protein				AT1G67060				LOC_Os02g12870.1
GRMZM2G130173				-1.5		structural constituent of ribosome
GRMZM2G136469				-1.5										LOC_Os04g44880.1
GRMZM2G163905				-1.5		Hypothetical protein LOC100382210
GRMZM2G380457				-1.5		LOC100276013				AT4G01150				LOC_Os06g15400.1
GRMZM2G395128				-1.5						AT2G36650				LOC_Os07g09040.1
GRMZM2G410757				-1.5		TSA: Zea mays contig10985, mRNA sequence				AT1G50732				LOC_Os05g03750.1
GRMZM2G427143				-1.5
GRMZM2G531804				-1.5		Hypothetical protein LOC100276845
GRMZM5G844309				-1.5		Putative uncharacterized protein
GRMZM2G005298				-1.5		starch branching enzyme III				AT3G20440	BE1,EMB2729	Alpha amylase family protein		LOC_Os06g26234.1
GRMZM2G002286				-1.5		esterase/lipase/thioesterase				AT3G30380		alpha/beta-Hydrolases superfamily protein		LOC_Os08g38092.1
GRMZM2G075562				-1.5		hypothetical protein LOC100304421		C2C2-CO-like		AT5G48250		B-box type zinc finger protein with CCT domain		LOC_Os02g49230.2
GRMZM2G062268				-1.5		hypothetical protein LOC100217176				AT4G17300	ATNS1,NS1,OVA8	Class II aminoacyl-tRNA and biotin synthetases superfamily protein		LOC_Os07g30200.1
GRMZM2G090411				-1.5		catalytic activity				AT5G28050		Cytidine/deoxycytidylate deaminase family protein		LOC_Os03g61810.1
GRMZM2G072388				-1.5		potassium ion transport				AT2G45630		D-isomer specific 2-hydroxyacid dehydrogenase family protein		LOC_Os04g01600.1
GRMZM2G091811				-1.5		hypothetical protein LOC100382361				AT2G22360		DNAJ heat shock family protein		LOC_Os05g26926.1
GRMZM2G139803				-1.5		catalytic activity				AT5G08410	FTRA2	ferredoxin/thioredoxin reductase subunit A (variable subunit) 2		LOC_Os02g42570.1
GRMZM2G176774				-1.5		hypothetical protein LOC100192098				AT5G62620		Galactosyltransferase family protein		LOC_Os03g58920.2
GRMZM2G123428				-1.5		hypothetical protein LOC100193876				AT3G06780		glycine-rich protein		LOC_Os01g24440.1
GRMZM2G158228				-1.5		histidyl-tRNA synthetase				AT3G46100	ATHRS1,HRS1	Histidyl-tRNA synthetase 1		LOC_Os02g51830.1
GRMZM2G132678				-1.5		transferase activity, transferring acyl groups other than amino-acyl groups				AT5G48930	HCT	hydroxycinnamoyl-CoA shikimate/quinate hydroxycinnamoyl transferase		LOC_Os08g43040.1
GRMZM2G300133				-1.5		protein kinase activity				AT1G75820	ATCLV1,CLV1,FAS3,FLO5	Leucine-rich receptor-like protein kinase family protein		LOC_Os06g50340.1
GRMZM2G019413				-1.5		hypothetical protein LOC100192093				AT2G30300		Major facilitator superfamily protein		LOC_Os01g61010.1
GRMZM2G177019				-1.5		hypothetical protein LOC100276908		mTERF		AT1G74120		Mitochondrial transcription termination factor family protein		LOC_Os12g30610.1
AC213884.3_FG002				-1.5						AT4G37260.1	ATMYB73,MYB73	myb domain protein 73		LOC_Os05g28320.1
GRMZM2G340534				-1.5		Transcribed locus, moderately similar to XP_002460468.1 hypothetical protein SORBIDRAFT_02g028890 [Sorghum bicolor]				AT5G24620		Pathogenesis-related thaumatin superfamily protein		LOC_Os09g32280.1
GRMZM2G092739				-1.5						AT5G02860		Pentatricopeptide repeat (PPR) superfamily protein		LOC_Os07g40120.1
GRMZM2G092762				-1.5		hypothetical protein LOC100383019 (LOC100383019), mRNA				AT2G06000		Pentatricopeptide repeat (PPR) superfamily protein		LOC_Os04g36840.1
GRMZM2G092780				-1.5		hypothetical protein LOC100382112				AT3G26570	ORF02,PHT2;1	phosphate transporter 2;1		LOC_Os02g38020.1
GRMZM2G472852				-1.5		ultraviolet-B-repressible protein				AT2G06520	PSBX	photosystem II subunit X		LOC_Os07g47640.1
GRMZM2G416184				-1.5		signal transducer activity				AT4G31820	ENP,MAB4,NPY1	Phototropic-responsive NPH3 family protein		LOC_Os09g25330.1
GRMZM2G114899				-1.5		protein kinase activity				AT1G77280		Protein kinase protein with adenine nucleotide alpha hydrolases-like domain		LOC_Os03g62340.1
GRMZM2G008309				-1.5		fiber expressed protein				AT1G61260		Protein of unknown function (DUF761)		LOC_Os07g37620.1
GRMZM2G169198				-1.5						AT2G25800		Protein of unknown function (DUF810)		LOC_Os09g17760.1
GRMZM2G157749				-1.5		hypothetical protein LOC100272463				AT3G07950		rhomboid protein-related		LOC_Os03g24390.1
AC203535.4_FG004				-1.5						AT1G71500.1		Rieske (2Fe-2S) domain-containing protein		LOC_Os11g13850.1
GRMZM2G142816				-1.5		protein binding				AT1G60360		RING/U-box superfamily protein		LOC_Os02g52870.1
GRMZM2G426888				-1.5		TSA: Zea mays contig14230, mRNA sequence				AT1G08070	OTP82	Tetratricopeptide repeat (TPR)-like superfamily protein		LOC_Os06g02400.1
GRMZM2G409224				-1.5		LOC100273824				AT1G05830	ATX2,SDG30	trithorax-like protein 2		LOC_Os09g38440.1
GRMZM2G111354				-1.5		transcription factor activity		WRKY		AT5G41570	ATWRKY24,WRKY24	WRKY DNA-binding protein 24		LOC_Os01g53260.1
AC234522.1_FG005				-1.4						AT4G23890.1				LOC_Os07g09800.1
GRMZM2G029868				-1.4		hypothetical protein LOC100272757
GRMZM2G030240				-1.4		hypothetical protein LOC100278102				AT5G62140				LOC_Os02g45460.1
GRMZM2G035732				-1.4		Clone 353978 mRNA sequence								LOC_Os06g05540.1
GRMZM2G081114				-1.4		TSA: Zea mays contig56400, mRNA sequence				AT3G47070				LOC_Os03g61090.1
GRMZM2G087079				-1.4		hypothetical protein LOC100382352				AT3G56010
GRMZM2G093902				-1.4		hypothetical protein LOC100194112
GRMZM2G121704				-1.4		Hypothetical protein LOC100384144
GRMZM2G133738				-1.4						AT3G19550				LOC_Os12g32290.1
GRMZM2G158097				-1.4		hypothetical protein LOC100381692				AT2G23390				LOC_Os04g36062.1
GRMZM2G301848				-1.4		hypothetical protein LOC100217210
GRMZM2G410293				-1.4										LOC_Os02g13540.1
GRMZM2G466309				-1.4		LOC100277464								LOC_Os02g48280.1
GRMZM2G483598				-1.4		Clone 1290319 mRNA sequence
GRMZM5G848269				-1.4		hypothetical protein LOC100384545
GRMZM2G440208				-1.4		phosphogluconate dehydrogenase (decarboxylating) activity				AT5G41670		6-phosphogluconate dehydrogenase family protein		LOC_Os11g29400.1
GRMZM2G132810				-1.4		actin binding				AT5G07740		actin binding		LOC_Os02g55150.1
GRMZM2G136262				-1.4		LOC100193006				AT4G25050	ACP4	acyl carrier protein 4		LOC_Os12g34890.1
GRMZM2G033098				-1.4		monooxygenase activity				AT5G42650	AOS,CYP74A,DDE2	allene oxide synthase		LOC_Os03g55800.1
GRMZM2G169087				-1.4		hypothetical protein LOC100384731				AT1G08980	AMI1,ATAMI1,ATTOC64-I,TOC64-I	amidase 1		LOC_Os04g02780.1
GRMZM2G121520				-1.4		metabolic process				AT1G70570		anthranilate phosphoribosyltransferase, putative		LOC_Os02g03850.1
GRMZM2G059026				-1.4		ATP-dependent peptidase activity				AT1G35340		ATP-dependent protease La (LON) domain protein		LOC_Os11g11210.1
GRMZM2G086277				-1.4		zinc finger, C2H2 type family protein		C2H2		AT5G52010		C2H2-like zinc finger protein		LOC_Os06g07020.1
GRMZM2G060011				-1.4		chalcone isomerase				AT3G63170		Chalcone-flavanone isomerase family protein		LOC_Os07g38390.1
GRMZM2G020938				-1.4		protein serine/threonine kinase activity				AT5G47750	D6PKL2,PK5	D6 protein kinase like 2		LOC_Os02g49310.1
GRMZM2G157156				-1.4		catalytic activity				AT3G27925	Deg1,DEGP1	DegP protease 1		LOC_Os05g49380.1
GRMZM2G052546				-1.4		protein amino acid dephosphorylation				AT3G52180	ATPTPKIS1,ATSEX4,DSP4,SEX4	dual specificity protein phosphatase (DsPTP1) family protein		LOC_Os03g01750.1
GRMZM5G896294				-1.4		TSA: Zea mays contig05143, mRNA sequence				AT2G43900		Endonuclease/exonuclease/phosphatase family protein		LOC_Os09g32440.1
GRMZM2G072205				-1.4		hypothetical protein LOC100280304				AT1G74960	ATKAS2,FAB1,KAS2	fatty acid biosynthesis 1		LOC_Os07g42420.1
GRMZM2G106190				-1.4		Fd VI				AT2G27510	ATFD3,FD3	ferredoxin 3		LOC_Os05g37140.1
GRMZM2G041060				-1.4		FK506 binding protein				AT4G19830		FKBP-like peptidyl-prolyl cis-trans isomerase family protein		LOC_Os02g07220.1
GRMZM2G149841				-1.4		sugar binding				AT5G62620		Galactosyltransferase family protein		LOC_Os07g09690.1
GRMZM2G420055				-1.4		O-sialoglycoprotein endopeptidase				AT2G45270	GCP1	glycoprotease 1		LOC_Os12g29990.1
GRMZM2G064001				-1.4		hypothetical protein LOC100192895				AT3G10970		Haloacid dehalogenase-like hydrolase (HAD) superfamily protein		LOC_Os05g07632.1
GRMZM2G436533				-1.4						AT2G33550		Homeodomain-like superfamily protein		LOC_Os04g32590.1
GRMZM2G013970				-1.4		hypothetical protein LOC100275360				AT5G54660		HSP20-like chaperones superfamily protein		LOC_Os05g42120.1
GRMZM2G057611				-1.4		hypothetical protein LOC100383435				AT5G14940		Major facilitator superfamily protein		LOC_Os06g13210.1
GRMZM2G409128				-1.4		hypothetical protein LOC100275580				AT5G01710		methyltransferases		LOC_Os08g02600.1
GRMZM2G536644				-1.4		hypothetical protein LOC100191825				AT1G80030		Molecular chaperone Hsp40/DnaJ family protein		LOC_Os02g56040.1
GRMZM2G011373				-1.4		catalytic activity				AT1G55370	NDF5	NDH-dependent cyclic electron flow 5		LOC_Os03g53710.1
GRMZM5G876022				-1.4						AT5G64700		nodulin MtN21 /EamA-like transporter family protein		LOC_Os12g33300.1
GRMZM2G019807				-1.4		LOC100282478				AT1G34000	OHP2	one-helix protein 2		LOC_Os01g40710.1
GRMZM2G315121				-1.4		hypothetical protein LOC100194053				AT1G12250		Pentapeptide repeat-containing protein		LOC_Os02g42960.1
GRMZM2G099604				-1.4		hypothetical protein LOC100191499				AT2G02980	OTP85	Pentatricopeptide repeat (PPR) superfamily protein		LOC_Os03g58100.1
GRMZM2G105827				-1.4		LOC100272359				AT4G21190	emb1417	Pentatricopeptide repeat (PPR) superfamily protein		LOC_Os01g55290.1
GRMZM2G071405				-1.4						AT2G44880		Pentatricopeptide repeat (PPR-like) superfamily protein		LOC_Os08g39130.1
GRMZM2G154743				-1.4		structural constituent of ribosome				AT2G46050		Pentatricopeptide repeat (PPR-like) superfamily protein		LOC_Os07g15570.1
GRMZM2G369792				-1.4						AT5G37570		Pentatricopeptide repeat (PPR-like) superfamily protein		LOC_Os04g33840.1
GRMZM2G072280				-1.4		chlorophyll a-b binding protein				AT3G61470	LHCA2	photosystem I light harvesting complex gene 2		LOC_Os07g38960.1
GRMZM2G087435				-1.4		Clone 381040 mRNA sequence				AT1G05385	LPA19,Psb27-H1	photosystem II 11 kDa protein-related		LOC_Os03g53640.1
GRMZM2G455676				-1.4		oxygen evolving complex				AT4G28660	PSB28	photosystem II reaction center PSB28 protein		LOC_Os01g71190.1
GRMZM2G074173				-1.4		hypothetical protein LOC100304272				AT5G47180		Plant VAMP (vesicle-associated membrane protein) family protein		LOC_Os10g40140.1
GRMZM2G000052				-1.4		electron carrier activity				AT2G43020	ATPAO2,PAO2	polyamine oxidase 2		LOC_Os04g53190.1
GRMZM2G012119				-1.4		LOC100272863				AT3G15840	PIFI	post-illumination chlorophyll fluorescence increase		LOC_Os03g38950.1
GRMZM2G137710				-1.4		protein serine/threonine kinase activity				AT3G44610		Protein kinase superfamily protein		LOC_Os12g05394.1
GRMZM2G479000				-1.4		ABC-type Co2+ transport system, permease component				AT4G19100		Protein of unknown function (DUF3464)		LOC_Os06g21530.1
GRMZM5G833124				-1.4		LOC100278802				AT5G49820	EMB1879,RUS6	Protein of unknown function, DUF647		LOC_Os05g34650.1
GRMZM2G115198				-1.4		LOC100275594				AT3G21300		RNA methyltransferase family protein		LOC_Os01g09750.1
GRMZM2G162200				-1.4		RUBISCO activase1				AT2G39730	RCA	rubisco activase		LOC_Os11g47970.1
GRMZM2G048740				-1.4		cytoplasm				AT4G35640	ATSERAT3;2,SERAT3;2	serine acetyltransferase 3;2		LOC_Os03g04140.1
GRMZM2G428020				-1.4						AT1G15760		Sterile alpha motif (SAM) domain-containing protein		LOC_Os06g08100.1
GRMZM2G445944				-1.4		hypothetical protein LOC100278144				AT5G23280		TCP family transcription factor		LOC_Os12g07480.1
GRMZM2G383154				-1.4		Putative uncharacterized protein				AT1G02910	LPA1	tetratricopeptide repeat (TPR)-containing protein		LOC_Os01g25600.1
GRMZM2G086030				-1.4		Clone 343185 mRNA sequence				AT4G28080		Tetratricopeptide repeat (TPR)-like superfamily protein		LOC_Os04g55230.1
GRMZM5G892758				-1.4		TSA: Zea mays contig04091, mRNA sequence				AT1G15290		Tetratricopeptide repeat (TPR)-like superfamily protein		LOC_Os04g55230.1
GRMZM2G014055				-1.4		thioredoxin H-type				AT1G59730	ATH7,TH7	thioredoxin H-type 7		LOC_Os07g08840.1
AC233901.1_FG004				-1.4						AT5G66100.1		winged-helix DNA-binding transcription factor family protein		LOC_Os03g06070.1
GRMZM2G140339				-1.4		RNA binding				AT5G66100		winged-helix DNA-binding transcription factor family protein		LOC_Os03g06070.1
AC196059.3_FG003				-1.4						AT5G21920.2	ATYLMG2,YLMG2	YGGT family protein		LOC_Os03g08080.1
AC206582.2_FG002				-1.3
GRMZM2G003389				-1.3		hypothetical protein LOC100275619								LOC_Os05g34920.1
GRMZM2G088543				-1.3		Transcribed locus								LOC_Os02g33790.1
GRMZM2G140763				-1.3		hypothetical protein LOC100275468								LOC_Os05g41380.1
GRMZM2G154422				-1.3		hypothetical protein LOC100381629
GRMZM2G154508				-1.3		LOC100283885								LOC_Os01g45640.1
GRMZM2G156376				-1.3		TSA: Zea mays contig40161, mRNA sequence
GRMZM2G302639				-1.3						AT1G52220				LOC_Os01g55570.1
GRMZM2G302913				-1.3						AT1G22060				LOC_Os10g21940.1
GRMZM2G329454				-1.3		TSA: Zea mays contig12211, mRNA sequence								LOC_Os03g62388.1
GRMZM2G373420				-1.3		hypothetical protein LOC100276210				AT2G17972				LOC_Os06g50130.1
GRMZM5G802232				-1.3		Putative uncharacterized protein
GRMZM2G388539				-1.3		ATP binding				AT5G03910	ATATH12,ATH12	ABC2 homolog 12		LOC_Os04g33700.1
GRMZM2G412492				-1.3		protein binding				AT4G14920		Acyl-CoA N-acyltransferase with RING/FYVE/PHD-type zinc finger protein		LOC_Os07g07690.1
GRMZM5G895400				-1.3		alanine metabolic process				AT4G01800	AGY1,AtcpSecA	Albino or Glassy Yellow 1		LOC_Os01g21820.1
GRMZM2G076631				-1.3		hypothetical protein LOC100272809				AT4G36530		alpha/beta-Hydrolases superfamily protein		LOC_Os02g47620.3
GRMZM2G019746				-1.3		hypothetical protein LOC100273193				AT5G63380		AMP-dependent synthetase and ligase family protein		LOC_Os07g17970.1
GRMZM2G324285				-1.3		metabolic process				AT1G70570		anthranilate phosphoribosyltransferase, putative		LOC_Os02g03850.1
GRMZM2G086876				-1.3		hypothetical protein LOC100194172				AT2G45850		AT hook motif DNA-binding family protein		LOC_Os04g58730.1
GRMZM2G120296				-1.3		nucleus				AT3G05800	AIF1	AtBS1(activation-tagged BRI1 suppressor 1)-interacting factor 1		LOC_Os01g14110.1
GRMZM5G871297				-1.3		LOC100194398				AT5G16715	EMB2247	ATP binding;valine-tRNA ligases;aminoacyl-tRNA ligases;nucleotide binding;ATP binding;aminoacyl-tRNA ligases		LOC_Os07g06940.1
GRMZM2G176375				-1.3		lipid transfer protein (LOC100285324), mRNA				AT3G22600		Bifunctional inhibitor/lipid-transfer protein/seed storage 2S albumin superfamily protein		LOC_Os07g07930.1
GRMZM5G826194				-1.3		Putative uncharacterized protein				AT5G16710	DHAR3	dehydroascorbate reductase 1		LOC_Os06g12630.1
GRMZM2G071996				-1.3		LOC100278360				AT1G75690		DnaJ/Hsp40 cysteine-rich domain superfamily protein		LOC_Os03g14040.1
GRMZM2G316214				-1.3		hypothetical protein LOC100278173				AT3G21520	AtDMP1,DMP1	DUF679 domain membrane protein 1		LOC_Os01g65992.1
GRMZM2G325019				-1.3		endonuclease activity				AT2G15820	OTP51	endonucleases		LOC_Os02g47360.1
GRMZM2G021427				-1.3		extracellular region				AT1G65680	ATEXPB2,ATHEXP BETA 1.4,EXPB2	expansin B2		LOC_Os10g40720.1
GRMZM2G354558				-1.3		omega-3 fatty acid desaturase				AT5G05580	FAD8	fatty acid desaturase 8		LOC_Os12g01370.1
GRMZM2G095333				-1.3		FKBP-type peptidyl-prolyl cis-trans isomerase 4				AT5G45680	ATFKBP13,FKBP13	FK506-binding protein 13		LOC_Os06g45340.1
GRMZM2G471065				-1.3		hydrolase activity, hydrolyzing O-glycosyl compounds				AT5G01930		Glycosyl hydrolase superfamily protein		LOC_Os05g25480.1
GRMZM2G139574				-1.3		transferase activity, transferring glycosyl groups				AT2G41640		Glycosyltransferase family 61 protein		LOC_Os05g32544.2
GRMZM2G053019				-1.3		translocon Tic40				AT5G16620	ATTIC40,PDE120,TIC40	hydroxyproline-rich glycoprotein family protein		LOC_Os04g35900.1
GRMZM5G851051				-1.3		hypothetical protein LOC100277231				AT1G70760	CRR23	inorganic carbon transport protein-related		LOC_Os05g28090.1
GRMZM2G455769				-1.3		harpin-induced protein				AT2G35460		Late embryogenesis abundant (LEA) hydroxyproline-rich glycoprotein family		LOC_Os03g62010.1
GRMZM2G060114				-1.3		hypothetical protein LOC100194019		mTERF		AT5G07900		Mitochondrial transcription termination factor family protein		LOC_Os06g12100.1
GRMZM2G028132				-1.3		DNA binding				AT3G57660	NRPA1	nuclear RNA polymerase A1		LOC_Os04g41490.1
GRMZM2G409133				-1.3		oxidoreductase				AT4G09670		Oxidoreductase family protein		LOC_Os10g26400.1
GRMZM2G161368				-1.3		LOC100281656				AT3G47530		Pentatricopeptide repeat (PPR) superfamily protein		LOC_Os08g33700.1
GRMZM2G083950				-1.3		chloroplast RNA processing1				AT5G42310		Pentatricopeptide repeat (PPR-like) superfamily protein		LOC_Os07g36390.1
GRMZM2G421231				-1.3						AT1G09900		Pentatricopeptide repeat (PPR-like) superfamily protein		LOC_Os01g57410.1
GRMZM2G132021				-1.3		aminoacyl-tRNA hydrolase activity				AT5G16140		Peptidyl-tRNA hydrolase family protein		LOC_Os01g04130.1
GRMZM2G043955				-1.3		DNA photolyase activity				AT2G47590	PHR2	photolyase/blue-light receptor 2		LOC_Os03g22330.1
GRMZM5G832229				-1.3		ultraviolet-B-repressible protein				AT2G06520	PSBX	photosystem II subunit X		LOC_Os07g47640.1
GRMZM2G016756				-1.3		nucleus		bHLH		AT2G43010	PIF4,SRL2	phytochrome interacting factor 4		LOC_Os03g56950.1
GRMZM2G017077				-1.3		hypothetical protein LOC100191375				AT1G65260	PTAC4,VIPP1	plastid transcriptionally active 4		LOC_Os01g67000.1
GRMZM2G071450				-1.3		hypothetical protein LOC100192779				AT1G76100	PETE1	plastocyanin 1		LOC_Os06g01210.1
GRMZM2G133958				-1.3		Hypothetical protein LOC100274389				AT1G64720	CP5	Polyketide cyclase/dehydrase and lipid transport superfamily protein		LOC_Os02g03230.1
GRMZM2G032132				-1.3		receptor-like protein kinase 5				AT5G13290	CRN,SOL2	Protein kinase superfamily protein		LOC_Os01g70260.1
GRMZM2G383735				-1.3		hypothetical protein LOC100275909				AT3G22540		Protein of unknown function (DUF1677)		LOC_Os03g46300.1
GRMZM2G026839				-1.3		hypothetical protein LOC100278954				AT4G28760		Protein of unknown function (DUF3741)		LOC_Os02g40410.1
GRMZM2G014441				-1.3		hypothetical protein LOC100275496				AT5G11460		Protein of unknown function (DUF581)		LOC_Os03g53520.1
GRMZM2G125020				-1.3		hypothetical protein LOC100276685				AT3G63210	MARD1	Protein of unknown function (DUF581)		LOC_Os01g08520.1
GRMZM2G407996				-1.3		LOC100283194				AT4G20360	ATRAB8D,ATRABE1B,RABE1b	RAB GTPase homolog E1B		LOC_Os02g38210.1
GRMZM2G028640				-1.3		enzyme of the cupin superfamily (LOC100284006), mRNA				AT4G10300		RmlC-like cupins superfamily protein		LOC_Os04g36760.1
GRMZM2G143870				-1.3		nucleic acid binding				AT3G52150		RNA-binding (RRM/RBD/RNP motifs) family protein		LOC_Os09g10760.1
GRMZM2G443240				-1.3		hormone activity				AT2G20210		RNI-like superfamily protein		LOC_Os12g12740.1
GRMZM2G047695				-1.3		Transcribed locus, strongly similar to XP_002456030.1 hypothetical protein SORBIDRAFT_03g029140 [Sorghum bicolor]				AT5G14260		Rubisco methyltransferase family protein		LOC_Os12g13460.1
GRMZM2G316136				-1.3		CBL-interacting serine/threonine-protein kinase 15				AT5G58380	CIPK10,PKS2,SIP1,SNRK3.8	SOS3-interacting protein 1		LOC_Os07g48100.1
GRMZM2G138012				-1.3		Transcribed locus, weakly similar to NP_001063138.1 Os09g0407800 [Oryza sativa Japonica Group]				AT4G02750		Tetratricopeptide repeat (TPR)-like superfamily protein		LOC_Os09g24240.1
GRMZM2G176523				-1.3		Clone 1587154 mRNA sequence				AT4G35130		Tetratricopeptide repeat (TPR)-like superfamily protein		LOC_Os03g04390.1
GRMZM2G383854				-1.3		MAP kinase activity				AT3G25060		Tetratricopeptide repeat (TPR)-like superfamily protein		LOC_Os10g39460.1
GRMZM2G430710				-1.3		protein kinase activity				AT1G16480		Tetratricopeptide repeat (TPR)-like superfamily protein		LOC_Os11g45410.1
GRMZM2G436710				-1.3		hypothetical protein LOC100194054				AT5G53490		Tetratricopeptide repeat (TPR)-like superfamily protein		LOC_Os10g35810.1
GRMZM2G022876				-1.3		permeases of the major facilitator superfamily				AT5G52970		thylakoid lumen 15.0 kDa protein		LOC_Os07g34950.1
GRMZM2G009785				-1.3		sucrose export defective1				AT4G32770	ATSDX1,VTE1	tocopherol cyclase, chloroplast / vitamin E deficient 1 (VTE1) / sucrose export defective 1 (SXD1)		LOC_Os02g17650.1
GRMZM2G104920				-1.3		ubiquitin ligase complex				AT2G32950	ATCOP1,COP1,DET340,EMB168,FUS1	Transducin/WD40 repeat-like superfamily protein		LOC_Os02g53140.1
GRMZM2G148864				-1.3		LOC100277692				AT4G14100		transferases, transferring glycosyl groups		LOC_Os07g29240.1
GRMZM2G119691				-1.3		hypothetical protein LOC100193325				AT2G24060		Translation initiation factor 3 protein		LOC_Os02g55120.1
GRMZM2G406974				-1.3		hypothetical protein LOC100383800				AT2G38320	TBL34	TRICHOME BIREFRINGENCE-LIKE 34		LOC_Os03g60300.1
GRMZM2G095905				-1.3		DNA binding				AT5G02950		Tudor/PWWP/MBT superfamily protein		LOC_Os05g38810.1
GRMZM2G173315				-1.3		metabolic process				AT2G36970		UDP-Glycosyltransferase superfamily protein		LOC_Os10g30560.1
GRMZM2G464891				-1.3		membrane				AT1G64150		Uncharacterized protein family (UPF0016)		LOC_Os01g12220.1
GRMZM2G344163				-1.3		hypothetical protein LOC100383583				AT5G33280		Voltage-gated chloride channel family protein		LOC_Os08g20570.1
GRMZM2G015433				-1.3		WRKY23 - superfamily of TFs having WRKY and zinc finger domains		WRKY		AT1G64000	ATWRKY56,WRKY56	WRKY DNA-binding protein 56		LOC_Os01g53260.1
GRMZM2G140016				-1.3		intracellular		C2H2		AT4G06634		zinc finger (C2H2 type) family protein		LOC_Os02g34680.1
GRMZM2G372684				-1.3		von Willebrand factor type A domain containing protein				AT1G08050		Zinc finger (C3HC4-type RING finger) family protein		LOC_Os11g45990.1
GRMZM2G107491				-1.3		zinc finger CCCH type domain-containing protein ZFN-like 2		C3H		AT3G02830	ZFN1	zinc finger protein 1		LOC_Os01g68860.1
GRMZM2G001889				-1.2		hypothetical protein LOC100304290
GRMZM2G009475				-1.2						AT1G52140				LOC_Os01g10180.1
GRMZM2G015727				-1.2		hypothetical protein LOC100275419				AT3G14900				LOC_Os04g42030.1
GRMZM2G067575				-1.2		Hypothetical protein LOC100303880								LOC_Os01g73940.1
GRMZM2G079034				-1.2		hypothetical protein LOC100277961				AT2G46630				LOC_Os01g01680.1
GRMZM2G082670				-1.2		hypothetical protein LOC100276584				AT5G44060				LOC_Os04g43310.1
GRMZM2G091825				-1.2		Transcribed locus, moderately similar to XP_002437851.1 hypothetical protein SORBIDRAFT_10g003740 [Sorghum bicolor]				AT1G53450				LOC_Os06g05950.1
GRMZM2G101744				-1.2		hypothetical protein LOC100192048								LOC_Os01g01050.2
GRMZM2G117558				-1.2		TSA: Zea mays contig50016, mRNA sequence				AT3G51510				LOC_Os05g41190.1
GRMZM2G132431				-1.2		Clone 335775 mRNA sequence								LOC_Os05g31785.1
GRMZM2G138029				-1.2
GRMZM2G152148				-1.2		Clone 323336 mRNA sequence
GRMZM2G349745				-1.2		hypothetical protein LOC100275671								LOC_Os02g37610.1
GRMZM2G373023				-1.2		Full-length cDNA clone ZM_BFc0119N21
GRMZM2G122327				-1.2		ferredoxin5				AT1G60950	ATFD2,FED A	2Fe-2S ferredoxin-like superfamily protein		LOC_Os08g01380.1
GRMZM2G105283				-1.2		hypothetical protein LOC100191202				AT3G11150		2-oxoglutarate (2OG) and Fe(II)-dependent oxygenase superfamily protein		LOC_Os01g61440.1
GRMZM2G081519				-1.2		DNA binding				AT1G34380		5\'-3\' exonuclease family protein		LOC_Os01g65400.1
GRMZM2G361066				-1.2		ATPase, coupled to transmembrane movement of substances				AT1G53270		ABC-2 type transporter family protein		LOC_Os01g42900.1
GRMZM5G854901				-1.2		RNA binding				AT5G26880	AGL26	AGAMOUS-like 26		LOC_Os08g39600.1
GRMZM2G415793				-1.2		hypothetical protein LOC100273356				AT3G25780	AOC3	allene oxide cyclase 3		LOC_Os03g32314.1
GRMZM2G022192				-1.2		translation				AT3G25660		Amidase family protein		LOC_Os04g55050.1
GRMZM2G141219				-1.2		DNA binding		AP2-EREBP		AT1G16060	ADAP	ARIA-interacting double AP2 domain protein		LOC_Os06g05340.1
GRMZM2G152919				-1.2		hypothetical protein LOC100383857				AT3G49810		ARM repeat superfamily protein		LOC_Os03g13010.1
GRMZM2G000973				-1.2		LOC100279947				AT3G49590		Autophagy-related protein 13		LOC_Os04g45570.1
GRMZM2G331638				-1.2		hypothetical protein LOC100217044				AT2G04850		Auxin-responsive family protein		LOC_Os03g09850.1
GRMZM2G056645				-1.2		hypothetical protein LOC100381565				AT1G03060	SPI	Beige/BEACH domain ;WD domain, G-beta repeat protein		LOC_Os03g53280.1
GRMZM2G114469				-1.2		homoiothermy				AT2G45870		Bestrophin-like protein		LOC_Os03g01570.1
GRMZM2G073584				-1.2		hydrolase activity, hydrolyzing O-glycosyl compounds				AT2G32810	BGAL9	beta galactosidase 9		LOC_Os12g24170.1
GRMZM2G065640				-1.2		lipid transport				AT2G48130		Bifunctional inhibitor/lipid-transfer protein/seed storage 2S albumin superfamily protein		LOC_Os03g57990.1
GRMZM2G066107				-1.2		CAAX amino terminal protease family protein				AT2G20725		CAAX amino terminal protease family protein		LOC_Os08g33900.1
GRMZM2G064386				-1.2		hypothetical protein LOC100279737				AT5G04250		Cysteine proteinases superfamily protein		LOC_Os02g57410.6
GRMZM2G415491				-1.2		hypothetical protein LOC100193526				AT5G26742	emb1138	DEAD box RNA helicase (RH3)
GRMZM2G013811				-1.2		hypothetical protein LOC100381522				AT5G64860	DPE1	disproportionating enzyme		LOC_Os07g43390.1
GRMZM2G095204				-1.2		extracellular region				AT1G65680	ATEXPB2,ATHEXP BETA 1.4,EXPB2	expansin B2		LOC_Os02g44108.1
GRMZM2G155753				-1.2		protein folding				AT5G13410		FKBP-like peptidyl-prolyl cis-trans isomerase family protein		LOC_Os07g04160.1
GRMZM2G069856				-1.2		hypothetical protein LOC100382237				AT5G07400		forkhead-associated domain-containing protein / FHA domain-containing protein		LOC_Os04g33050.1
GRMZM2G087598				-1.2		filamentation temperature-sensitive H 2B				AT2G30950	FTSH2,VAR2	FtsH extracellular protease family		LOC_Os06g45820.1
GRMZM2G058404				-1.2		isoprenoid biosynthetic process				AT4G36810	GGPS1	geranylgeranyl pyrophosphate synthase 1		LOC_Os01g14630.1
GRMZM2G088669				-1.2		LOC100276774				AT5G14910		Heavy metal transport/detoxification superfamily protein		LOC_Os05g27100.1
GRMZM2G140288				-1.2		hypothetical protein LOC100383928				AT5G64610	HAM1	histone acetyltransferase of the MYST family 1		LOC_Os07g43360.1
GRMZM2G151266				-1.2		transcription factor activity				AT4G12750		Homeodomain-like transcriptional regulator		LOC_Os07g42750.2
GRMZM2G454176				-1.2		Clone 425784 mRNA sequence				AT4G12750		Homeodomain-like transcriptional regulator		LOC_Os01g48180.1
GRMZM2G111224				-1.2		TSA: Zea mays contig31810, mRNA sequence				AT1G19110		inter-alpha-trypsin inhibitor heavy chain-related		LOC_Os07g42280.1
GRMZM2G146152				-1.2		laccase-like				AT5G60020	ATLAC17,LAC17	laccase 17		LOC_Os05g38390.1
GRMZM2G059117				-1.2		protein kinase activity				AT3G28040		Leucine-rich receptor-like protein kinase family protein		LOC_Os01g72700.1
GRMZM2G153184				-1.2		LOC100284001				AT3G47470	CAB4,LHCA4	light-harvesting chlorophyll-protein complex I subunit A4		LOC_Os08g33820.1
GRMZM2G158043				-1.2		catalytic activity				AT5G04360	ATLDA,ATPU1,LDA,PU1	limit dextrinase		LOC_Os08g40930.1
GRMZM2G176253				-1.2		peptide transporter PTR2				AT3G21670		Major facilitator superfamily protein		LOC_Os04g39030.1
GRMZM2G436001				-1.2		catalytic activity				AT4G36390		Methylthiotransferase		LOC_Os11g38030.1
GRMZM2G047457				-1.2		structural constituent of ribosome				AT5G42130		Mitochondrial substrate carrier family protein		LOC_Os01g73420.1
GRMZM5G805134				-1.2						AT5G27390		Mog1/PsbP/DUF1795-like photosystem II reaction center PsbP family protein		LOC_Os05g33300.1
GRMZM2G069708				-1.2		hypothetical protein LOC100274377				AT1G32220		NAD(P)-binding Rossmann-fold superfamily protein		LOC_Os04g33060.1
GRMZM2G439589				-1.2		TSA: Zea mays contig28716, mRNA sequence				AT2G39080		NAD(P)-binding Rossmann-fold superfamily protein		ChrUn.fgenesh.mRNA.69
GRMZM2G322328				-1.2		calcium ion binding				AT4G28220	NDB1	NAD(P)H dehydrogenase B1		LOC_Os06g47000.1
GRMZM2G001904				-1.2		hypothetical protein LOC100192785				AT1G76730		NagB/RpiA/CoA transferase-like superfamily protein		LOC_Os12g07020.1
GRMZM5G865543				-1.2		electron carrier activity				AT3G16250	NDF4	NDH-dependent cyclic electron flow 1		LOC_Os07g30670.1
GRMZM2G384528				-1.2		nuclear transcription factor Y subunit B-3				AT4G14540	NF-YB3	nuclear factor Y, subunit B3		LOC_Os07g41580.1
GRMZM2G053236				-1.2		ATP-dependent Clp protease proteolytic subunit				AT5G23140	CLPP2,NCLPP7	nuclear-encoded CLP protease P7		LOC_Os02g42290.1
GRMZM2G043275				-1.2		nudix hydrolase 13				AT3G12600	atnudt16,NUDT16	nudix hydrolase homolog 16		LOC_Os03g59580.1
GRMZM2G420723				-1.2		hypothetical protein LOC100383014				AT3G16890	PPR40	pentatricopeptide (PPR) domain protein 40		LOC_Os12g37100.1
AC204292.4_FG002				-1.2						AT1G20230.1		Pentatricopeptide repeat (PPR) superfamily protein		LOC_Os05g30710.1
GRMZM2G006763				-1.2		tetratricopeptide-like helical				AT5G42450		Pentatricopeptide repeat (PPR) superfamily protein		LOC_Os01g62220.1
GRMZM2G105542				-1.2		hypothetical protein LOC100272731				AT1G09900		Pentatricopeptide repeat (PPR-like) superfamily protein		LOC_Os01g57410.1
GRMZM2G000719				-1.2		carboxyl-terminal-processing protease				AT5G46390		Peptidase S41 family protein		LOC_Os01g47450.1
GRMZM2G029824				-1.2		LOC100286006				AT1G01820	PEX11C	peroxin 11c		LOC_Os03g02590.2
GRMZM2G078756				-1.2		hypothetical protein LOC100194290				AT3G58140		phenylalanyl-tRNA synthetase class IIc family protein		LOC_Os12g34860.1
GRMZM2G071172				-1.2		TSA: Zea mays contig29095, mRNA sequence				AT3G61380		Phosphatidylinositol N-acetyglucosaminlytransferase subunit P-related		LOC_Os10g40250.1
GRMZM2G111208				-1.2		zinc ion binding				AT3G14270	FAB1B	phosphatidylinositol-4-phosphate 5-kinase family protein		LOC_Os03g28140.1
GRMZM2G463280				-1.2		ATP binding				AT1G32060	PRK	phosphoribulokinase		LOC_Os02g47020.1
GRMZM2G038365				-1.2		hypothetical protein LOC100273026				AT4G03280	PETC,PGR1	photosynthetic electron transfer C		LOC_Os07g37030.1
AC190623.3_FG001				-1.2						AT2G30570.1	PSBW	photosystem II reaction center W		LOC_Os01g56680.2
GRMZM2G080537				-1.2		protein kinase activity				AT2G02220	ATPSKR1,PSKR1	phytosulfokin receptor 1		LOC_Os02g41890.1
GRMZM2G171406				-1.2		hypothetical protein LOC100217229				AT5G47180		Plant VAMP (vesicle-associated membrane protein) family protein		LOC_Os10g40140.1
GRMZM2G116526				-1.2						AT3G04260	PTAC3	plastid transcriptionally active 3		LOC_Os10g32540.1
GRMZM2G026218				-1.2		microtubule motor activity				AT5G47820	FRA1	P-loop containing nucleoside triphosphate hydrolases superfamily protein		LOC_Os09g02650.1
GRMZM2G039345				-1.2						AT1G73110		P-loop containing nucleoside triphosphate hydrolases superfamily protein		LOC_Os04g56320.1
GRMZM2G433025				-1.2		TSA: Zea mays contig40583, mRNA sequence				AT3G19810		Protein of unknown function (DUF177)		LOC_Os02g58450.1
GRMZM5G844894				-1.2		plant-specific domain TIGR01627 family protein				AT1G09610		Protein of unknown function (DUF579)		LOC_Os12g10320.1
GRMZM5G885766				-1.2		L-arabinose metabolic process				AT5G12960		Putative glycosyl hydrolase of unknown function (DUF1680)		LOC_Os06g41020.1
GRMZM5G887647				-1.2		hypothetical protein LOC100382929				AT2G01350	QPT	quinolinate phoshoribosyltransferase		LOC_Os09g38060.1
GRMZM2G394321				-1.2		protein kinase activity				AT1G48480	RKL1	receptor-like kinase 1		LOC_Os04g38910.1
GRMZM2G134313				-1.2		LOC100194342				AT5G08710		Regulator of chromosome condensation (RCC1) family protein		LOC_Os11g34320.1
GRMZM2G402309				-1.2						AT5G42140		Regulator of chromosome condensation (RCC1) family with FYVE zinc finger domain		LOC_Os05g01610.1
GRMZM2G319187				-1.2		hypothetical protein LOC100280118				AT3G57040	ARR9,ATRR4	response regulator 9		LOC_Os01g72330.1
GRMZM2G377487				-1.2						AT1G17850		Rhodanese/Cell cycle control phosphatase superfamily protein		LOC_Os03g64350.1
GRMZM2G142097				-1.2		structural constituent of ribosome				AT1G48350		Ribosomal L18p/L5e family protein		LOC_Os03g61260.1
GRMZM2G171444				-1.2		ribosomal protein L19				AT4G17560		Ribosomal protein L19 family protein		LOC_Os02g43600.1
GRMZM2G361569				-1.2		hypothetical protein LOC100193993				AT1G68590		Ribosomal protein PSRP-3/Ycf65		LOC_Os04g38750.1
GRMZM2G115156				-1.2		ribosome-binding factor A				AT4G34730		ribosome-binding factor A family protein		LOC_Os06g04610.1
GRMZM2G022313				-1.2		hypothetical protein LOC100279976				AT3G07810		RNA-binding (RRM/RBD/RNP motifs) family protein		LOC_Os07g39560.1
AC198982.3_FG006				-1.2						AT5G14260.1		Rubisco methyltransferase family protein		LOC_Os12g13460.1
GRMZM2G130379				-1.2		lysosphingolipid and lysophosphatidic acid receptor activity				AT5G51010		Rubredoxin-like superfamily protein		LOC_Os11g32500.1
GRMZM2G131708				-1.2		metabolic process				AT4G29590		S-adenosyl-L-methionine-dependent methyltransferases superfamily protein		LOC_Os01g51530.1
GRMZM2G136366				-1.2		RNA binding				AT2G22400		S-adenosyl-L-methionine-dependent methyltransferases superfamily protein		LOC_Os08g37780.1
GRMZM2G300135				-1.2		product:physical impedance induced protein				AT3G51250		Senescence/dehydration-associated protein-related		LOC_Os06g50330.1
GRMZM2G109725				-1.2		LOC100281615				AT3G61415	ASK21,SK21	SKP1-like 21		LOC_Os03g01660.1
GRMZM2G093405				-1.2		heme-binding protein 2				AT1G17100		SOUL heme-binding family protein		LOC_Os01g11230.1
AC203841.3_FG002				-1.2						AT3G63370.1	OTP86	Tetratricopeptide repeat (TPR)-like superfamily protein		LOC_Os04g39410.1
AC207628.4_FG003				-1.2						AT5G40405.1		Tetratricopeptide repeat (TPR)-like superfamily protein		LOC_Os01g51790.1
GRMZM2G137064				-1.2		hypothetical protein LOC100191293				AT1G01970		Tetratricopeptide repeat (TPR)-like superfamily protein		LOC_Os07g46730.1
GRMZM2G331779				-1.2		hypothetical protein LOC100216998				AT3G23330		Tetratricopeptide repeat (TPR)-like superfamily protein		LOC_Os07g39090.1
GRMZM2G340279				-1.2						AT4G33990	EMB2758	Tetratricopeptide repeat (TPR)-like superfamily protein		LOC_Os03g27880.1
GRMZM2G341621				-1.2		PPR2				AT3G06430	EMB2750	Tetratricopeptide repeat (TPR)-like superfamily protein		LOC_Os03g19650.1
GRMZM2G427826				-1.2		Transcribed locus, moderately similar to NP_001059402.1 Os07g0294600 [Oryza sativa Japonica Group]				AT1G71490		Tetratricopeptide repeat (TPR)-like superfamily protein		LOC_Os07g19400.1
GRMZM2G126235				-1.2		ion channel activity				AT4G03560	ATCCH1,ATTPC1,FOU2,TPC1	two-pore channel 1		LOC_Os01g48680.1
GRMZM2G124321				-1.2		Putative uncharacterized protein				AT2G03390		uvrB/uvrC motif-containing protein		LOC_Os01g55880.1
GRMZM2G113002				-1.2		protein binding				AT2G28840	XBAT31	XB3 ortholog 1 in Arabidopsis thaliana		LOC_Os03g16780.1
GRMZM2G129302				-1.2		glycosyltransferase 5				AT3G62720	ATXT1,XT1,XXT1	xylosyltransferase 1		LOC_Os03g18820.1
AC198923.4_FG002				-1.1										LOC_Os01g71170.1
AC213981.3_FG001				-1.1
GRMZM2G010196				-1.1		LOC100193255				AT5G58250				LOC_Os03g21370.1
GRMZM2G032266				-1.1		TSA: Zea mays contig42618, mRNA sequence				AT1G62780				LOC_Os04g01540.1
GRMZM2G074252				-1.1		protein folding				AT3G45050				LOC_Os06g51470.1
GRMZM2G075851				-1.1		hypothetical protein LOC100277886				AT5G57910				LOC_Os08g16930.1
GRMZM2G077024				-1.1		Transcribed locus, moderately similar to XP_002442376.1 hypothetical protein SORBIDRAFT_08g019100 [Sorghum bicolor]				AT5G61040				LOC_Os12g38730.1
GRMZM2G104397				-1.1		TSA: Zea mays contig44056, mRNA sequence				AT2G38780				LOC_Os05g31680.1
GRMZM2G134244				-1.1		hypothetical protein LOC100193448
GRMZM2G145850				-1.1		TSA: Zea mays contig01413, mRNA sequence				AT2G01755				LOC_Os03g50530.1
GRMZM2G149534				-1.1		hypothetical protein LOC100275988				AT4G03150				LOC_Os12g34880.1
GRMZM2G179551				-1.1		hypothetical protein LOC100273461
GRMZM2G335593				-1.1		verprolin								LOC_Os03g56944.1
GRMZM2G444138				-1.1		hypothetical protein LOC100277824				AT2G01580				LOC_Os04g01960.1
GRMZM2G450048				-1.1		hypothetical protein LOC100278880 (LOC100278880), mRNA
GRMZM2G584876				-1.1
GRMZM5G834952				-1.1		Putative uncharacterized protein
GRMZM2G040511				-1.1		LOC100281496				AT5G64940	ATATH13,ATH13,ATOSA1,OSA1	ABC2 homolog 13		LOC_Os02g36570.1
GRMZM5G858094				-1.1		product:acetyl-coenzyme A carboxylase ACC1A				AT1G36180	ACC2	acetyl-CoA carboxylase 2		LOC_Os05g22940.1
GRMZM2G350802				-1.1		TSA: Zea mays contig17334, mRNA sequence				AT1G52080	AR791	actin binding protein family		LOC_Os05g09380.1
GRMZM2G147775				-1.1		actin binding				AT2G16700	ADF5,ATADF5	actin depolymerizing factor 5		LOC_Os03g13950.1
GRMZM2G123204				-1.1		LOC100193051				AT3G57610	ADSS	adenylosuccinate synthase		LOC_Os03g49220.1
GRMZM2G169516				-1.1		hypothetical protein LOC100274566				AT5G48220		Aldolase-type TIM barrel family protein		LOC_Os04g39270.1
GRMZM2G424873				-1.1		cellular amino acid biosynthetic process				AT1G26640		Amino acid kinase family protein		LOC_Os01g55890.4
AC205362.4_FG002				-1.1						AT5G49630.1	AAP6	amino acid permease 6		LOC_Os12g09300.1
GRMZM2G092481				-1.1		hypothetical protein LOC100382432				AT5G66055	AKRP,EMB16,EMB2036	ankyrin repeat protein		LOC_Os03g04300.1
GRMZM2G090493				-1.1		exodeoxyribonuclease V				AT3G01400		ARM repeat superfamily protein		LOC_Os03g32100.1
GRMZM2G151529				-1.1		HCF106C precursor protein				AT5G52440	HCF106	Bacterial sec-independent translocation protein mttA/Hcf106		LOC_Os11g37130.1
GRMZM2G472651				-1.1		THA4				AT5G28750		Bacterial sec-independent translocation protein mttA/Hcf106		LOC_Os03g43430.1
GRMZM5G898735				-1.1		plasma membrane				AT5G52440	HCF106	Bacterial sec-independent translocation protein mttA/Hcf106		LOC_Os11g37130.1
GRMZM2G076946				-1.1		hydrolase activity, hydrolyzing O-glycosyl compounds				AT3G60130	BGLU16	beta glucosidase 16		LOC_Os04g39880.1
GRMZM2G318408				-1.1		RING zinc finger protein-like				AT3G61460	BRH1	brassinosteroid-responsive RING-H2		LOC_Os04g49000.1
GRMZM2G108457				-1.1		carotenoid isomerase 2				AT1G06820	CCR2,CRTISO	carotenoid isomerase		LOC_Os11g36440.1
GRMZM2G117300				-1.1		hypothetical protein LOC100193022				AT2G38270	ATGRX2,CXIP2	CAX-interacting protein 2		LOC_Os12g07650.1
AC196066.3_FG003				-1.1						AT1G55930.1		CBS domain-containing protein / transporter associated domain-containing protein		LOC_Os03g39640.2
GRMZM2G027794				-1.1		hypothetical protein LOC100383102				AT4G07960	ATCSLC12,CSLC12	Cellulose-synthase-like C12		LOC_Os01g56130.1
GRMZM2G157350				-1.1		hypothetical protein LOC100275637				AT2G24395		chaperone protein dnaJ-related		LOC_Os08g40919.2
GRMZM2G077333				-1.1		photosystem II 22 kDa protein				AT1G44575	NPQ4,PSBS	Chlorophyll A-B binding family protein		LOC_Os01g64960.1
GRMZM2G163988				-1.1		LOC100286220				AT3G15190		chloroplast 30S ribosomal protein S20, putative		LOC_Os01g48690.1
GRMZM2G036590				-1.1		LOC100217168				AT5G17710	EMB1241	Co-chaperone GrpE family protein		LOC_Os02g39870.1
GRMZM2G181568				-1.1		hypothetical protein LOC100277401				AT4G24460	CLT2	CRT (chloroquine-resistance transporter)-like transporter 2		LOC_Os12g32650.1
GRMZM2G128444				-1.1		hypothetical protein LOC100273272				AT2G38025		Cysteine proteinases superfamily protein		LOC_Os03g15930.1
GRMZM2G351259				-1.1		monooxygenase activity				AT1G13110	CYP71B7	cytochrome P450, family 71 subfamily B, polypeptide 7		LOC_Os04g10160.1
GRMZM2G137151				-1.1		deoxy xylulose synthase 1				AT4G15560	CLA,CLA1,DEF,DXPS2,DXS	Deoxyxylulose-5-phosphate synthase		LOC_Os05g33840.1
AC215260.3_FG001				-1.1						AT5G42510.1		Disease resistance-responsive (dirigent-like protein) family protein		LOC_Os07g42520.1
GRMZM2G073954				-1.1		arsenite transport subunit B				AT1G02260		Divalent ion symporter		LOC_Os02g57620.1
GRMZM2G021687				-1.1		hypothetical protein LOC100277608				AT2G34860	EDA3	DnaJ/Hsp40 cysteine-rich domain superfamily protein		LOC_Os08g36140.1
GRMZM2G110023				-1.1		ATP-dependent Clp protease ATP-binding subunit clpA				AT4G12060		Double Clp-N motif protein		LOC_Os03g14280.1
GRMZM2G078569				-1.1		lipid metabolic process				AT4G30950	FAD6,FADC,SFD4	fatty acid desaturase 6		LOC_Os08g34220.1
GRMZM2G441444				-1.1		Clone 323034 mRNA sequence				AT4G01690	HEMG1,PPO1,PPOX	Flavin containing amine oxidoreductase family		LOC_Os01g18320.1
GRMZM2G103843				-1.1		ribokinase activity				AT1G69200	FLN2	fructokinase-like 2		LOC_Os03g40550.1
GRMZM2G107402				-1.1		shikimate 5-dehydrogenase activity				AT1G58290	HEMA1	Glutamyl-tRNA reductase family protein		LOC_Os10g35840.1
GRMZM5G876898				-1.1		LOC100279332				AT1G11860		Glycine cleavage T-protein family		LOC_Os04g53230.1
GRMZM5G825321				-1.1		Putative uncharacterized protein				AT4G00150	ATHAM3,HAM3	GRAS family transcription factor		LOC_Os04g46860.1
GRMZM2G156803				-1.1		hypothetical protein LOC100383821				AT5G64300	ATGCH,ATRIBA1,GCH,RFD1	GTP cyclohydrolase II		LOC_Os02g36340.1
GRMZM2G051955				-1.1		ZF-HD homeobox protein		zf-HD		AT5G15210	ATHB30,HB30,ZFHD3	homeobox protein 30		LOC_Os09g24820.1
GRMZM2G026117				-1.1		hydroxymethylbilane synthase activity				AT5G08280	HEMC	hydroxymethylbilane synthase		LOC_Os02g07230.1
GRMZM2G041159				-1.1		LOC100284619				AT5G08280	HEMC	hydroxymethylbilane synthase		LOC_Os02g07230.1
GRMZM2G019373				-1.1		LOC100194091				AT5G09530		hydroxyproline-rich glycoprotein family protein		LOC_Os07g40870.1
GRMZM2G150796				-1.1		isoamylase-type starch debranching enzyme ISO3				AT4G09020	ATISA3,ISA3	isoamylase 3		LOC_Os09g29404.1
GRMZM2G342509				-1.1		hypothetical protein LOC100273542 (LOC100273542), mRNA				AT4G06744		Leucine-rich repeat (LRR) family protein		LOC_Os04g42620.1
GRMZM2G026943				-1.1		hypothetical protein LOC100272957				AT3G47090		Leucine-rich repeat protein kinase family protein		LOC_Os02g40240.1
GRMZM2G046681				-1.1		LOC100191676				AT4G00370	ANTR2,PHT4;4	Major facilitator superfamily protein		LOC_Os09g39680.1
GRMZM2G089308				-1.1		LOC100273309				AT4G21860	MSRB2	methionine sulfoxide reductase B 2		LOC_Os05g33510.1
GRMZM2G029055				-1.1		nucleotide binding				AT3G55400	OVA1	methionyl-tRNA synthetase / methionine--tRNA ligase / MetRS (cpMetRS)		LOC_Os03g11120.1
GRMZM2G024823				-1.1		hypothetical protein LOC100273155				AT5G46800	BOU	Mitochondrial substrate carrier family protein		LOC_Os10g42299.3
GRMZM2G000256				-1.1		LOC100192838				AT5G11450		Mog1/PsbP/DUF1795-like photosystem II reaction center PsbP family protein		LOC_Os01g43070.1
GRMZM2G009892				-1.1		NAC domain protein NAC5		NAC		AT5G61430	ANAC100,ATNAC5,NAC100	NAC domain containing protein 100		LOC_Os04g38720.1
GRMZM5G857641				-1.1						AT2G37980		O-fucosyltransferase family protein		LOC_Os01g63230.1
GRMZM2G135808				-1.1		protein binding				AT4G03260		Outer arm dynein light chain 1 protein		LOC_Os07g01550.1
GRMZM2G034645				-1.1		vegetative storage protein				AT1G68930		pentatricopeptide (PPR) repeat-containing protein		LOC_Os05g06150.1
GRMZM2G040947				-1.1		hypothetical protein LOC100381772				AT1G74600		pentatricopeptide (PPR) repeat-containing protein		LOC_Os09g24680.1
GRMZM2G128665				-1.1		hypothetical protein LOC100191483				AT4G16390		pentatricopeptide (PPR) repeat-containing protein		LOC_Os03g11670.1
GRMZM2G023999				-1.1		Putative uncharacterized protein				AT3G48810		Pentatricopeptide repeat (PPR) superfamily protein		LOC_Os05g04160.1
GRMZM2G028718				-1.1		nucleic acid binding				AT5G59900		Pentatricopeptide repeat (PPR) superfamily protein		LOC_Os01g06000.1
GRMZM2G057176				-1.1						AT1G25360		Pentatricopeptide repeat (PPR) superfamily protein		LOC_Os07g39910.1
GRMZM2G093098				-1.1		Clone 235280 mRNA sequence				AT1G10910		Pentatricopeptide repeat (PPR) superfamily protein		LOC_Os01g37870.1
GRMZM2G132956				-1.1						AT1G22960		Pentatricopeptide repeat (PPR) superfamily protein		LOC_Os12g05640.1
GRMZM2G166407				-1.1						AT3G42630		Pentatricopeptide repeat (PPR) superfamily protein		LOC_Os08g40870.1
GRMZM2G100518				-1.1						AT1G31430		Pentatricopeptide repeat (PPR-like) superfamily protein		LOC_Os06g39650.1
GRMZM2G132140				-1.1		hypothetical protein LOC100274147				AT1G71460		Pentatricopeptide repeat (PPR-like) superfamily protein		LOC_Os12g10184.1
GRMZM2G353195				-1.1		hypothetical protein LOC100191659				AT1G09900		Pentatricopeptide repeat (PPR-like) superfamily protein		LOC_Os03g21780.1
GRMZM2G052666				-1.1		LOC100285733				AT4G25130	PMSR4	peptide met sulfoxide reductase 4		LOC_Os10g41400.1
GRMZM2G072091				-1.1		LOC100193286				AT1G66430		pfkB-like carbohydrate kinase family protein		LOC_Os06g12600.1
GRMZM2G137029				-1.1		Transcribed locus, strongly similar to XP_002454489.1 hypothetical protein SORBIDRAFT_04g032000 [Sorghum bicolor]				AT3G61060	AtPP2-A13,PP2-A13	phloem protein 2-A13		LOC_Os02g45320.1
GRMZM2G098973				-1.1		LOC100284411				AT5G62840		Phosphoglycerate mutase family protein		LOC_Os01g47190.1
GRMZM2G141634				-1.1		catalytic activity				AT3G50520		Phosphoglycerate mutase family protein		LOC_Os08g37140.1
GRMZM2G033493				-1.1		hypothetical protein LOC100193314				AT2G20890	PSB29,THF1	photosystem II reaction center PSB29 protein		LOC_Os07g37250.1
GRMZM2G444075				-1.1		signal transducer activity				AT3G22104		Phototropic-responsive NPH3 family protein		LOC_Os07g36230.1
GRMZM2G091228				-1.1		hypothetical protein LOC100382428				AT5G44070	ARA8,ATPCS1,CAD1,PCS1	phytochelatin synthase 1 (PCS1)		LOC_Os06g01260.1
GRMZM2G146878				-1.1		hypothetical protein LOC100382233				AT1G66840		Plant protein of unknown function (DUF827)		LOC_Os01g49740.1
GRMZM2G026800				-1.1		homoiothermy				AT2G46910		Plastid-lipid associated protein PAP / fibrillin family protein
GRMZM2G171871				-1.1		structural molecule activity				AT1G51110		Plastid-lipid associated protein PAP / fibrillin family protein		LOC_Os07g28790.1
AC190628.4_FG007				-1.1						AT1G50140.1		P-loop containing nucleoside triphosphate hydrolases superfamily protein		LOC_Os02g51400.1
GRMZM2G026371				-1.1		nucleic acid binding				AT5G08610		P-loop containing nucleoside triphosphate hydrolases superfamily protein
GRMZM2G083820				-1.1		ATP binding				AT3G19740		P-loop containing nucleoside triphosphate hydrolases superfamily protein		LOC_Os02g51400.1
GRMZM5G862325				-1.1		transporter activity				AT3G18830	ATPLT5,ATPMT5,PMT5	polyol/monosaccharide transporter 5		LOC_Os11g41850.1
GRMZM2G003869				-1.1		LOC100273524				AT5G21222		protein kinase family protein		LOC_Os06g05920.1
GRMZM2G127984				-1.1		hypothetical protein LOC100272326				AT2G41970		Protein kinase superfamily protein		LOC_Os02g35760.1
GRMZM2G010389				-1.1		hypothetical protein LOC100276143				AT5G23040	CDF1	Protein of unknown function (DUF3353)		LOC_Os09g21250.1
GRMZM2G034120				-1.1		ubiquinol-cytochrome-c reductase activity				AT2G40400		Protein of unknown function (DUF399 and DUF3411)		LOC_Os05g39680.1
GRMZM2G026881				-1.1		Hypothetical protein LOC100273350				AT3G50220		Protein of unknown function (DUF579)		LOC_Os06g47310.1
GRMZM2G113159				-1.1		cp protein				AT2G03350		Protein of unknown function, DUF538		LOC_Os03g11210.1
GRMZM2G049661				-1.1		acid-amino acid ligase activity				AT5G62800		Protein with RING/U-box and TRAF-like domains		LOC_Os01g03170.1
GRMZM2G043948				-1.1		hypothetical protein LOC100193430				AT2G30320		Pseudouridine synthase family protein		LOC_Os03g21980.1
GRMZM2G315931				-1.1		hypothetical protein LOC100381708				AT4G33520	HMA6,PAA1	P-type ATP-ase 1		LOC_Os08g37950.1
GRMZM2G306345				-1.1		catalytic activity				AT4G15530	PPDK	pyruvate orthophosphate dikinase		LOC_Os05g33570.2
GRMZM2G142836				-1.1		quinolinate synthetase A activity				AT5G50210	OLD5,QS,SUFE3	quinolinate synthase		LOC_Os12g19304.2
GRMZM2G168412				-1.1		cytoplasm				AT2G39670		Radical SAM superfamily protein		LOC_Os01g74190.1
GRMZM2G301663				-1.1		RALF				AT1G02900	ATRALF1,RALF1,RALFL1	rapid alkalinization factor 1		LOC_Os12g35670.1
GRMZM2G151983				-1.1		Full-length cDNA clone ZM_BFb0313M06				AT3G23590	MED33A,RFR1	REF4-related 1		LOC_Os07g48350.1
GRMZM5G877708				-1.1		TSA: Zea mays contig35377, mRNA sequence				AT4G02260	AT-RSH1,ATRSH1,RSH1	RELA/SPOT homolog 1		LOC_Os03g22160.1
GRMZM2G035820				-1.1		chloroplast ribonuclease III domain protein				AT4G37510		Ribonuclease III family protein		LOC_Os01g59510.1
GRMZM2G108643				-1.1		hypothetical protein LOC100274150				AT3G54210		Ribosomal protein L17 family protein		LOC_Os03g60100.1
GRMZM2G109165				-1.1		structural constituent of ribosome				AT2G43030		Ribosomal protein L3 family protein		LOC_Os02g04460.1
GRMZM2G170870				-1.1		50S ribosomal protein L6				AT1G05190	emb2394	Ribosomal protein L6 family		LOC_Os03g24020.1
AC199526.5_FG003				-1.1						AT1G23400.1	ATCAF2,CAF2	RNA-binding CRS1 / YhbY (CRM) domain-containing protein		LOC_Os01g21990.1
GRMZM2G134439				-1.1		DNA binding		Trihelix		AT5G63420	emb2746	RNA-metabolising metallo-beta-lactamase family protein		LOC_Os02g33610.1
GRMZM2G123652				-1.1		potassium ion transport				AT1G50450		Saccharopine dehydrogenase		LOC_Os12g04260.1
GRMZM2G077486				-1.1		LOC100284203				AT3G62000		S-adenosyl-L-methionine-dependent methyltransferases superfamily protein		LOC_Os08g05790.1
GRMZM2G039583				-1.1		Transcribed locus, moderately similar to NP_001140673.1 hypothetical protein LOC100272748 [Zea mays]				AT2G02370		SNARE associated Golgi protein family		LOC_Os07g44020.1
GRMZM2G305048				-1.1						AT1G53210		sodium/calcium exchanger family protein / calcium-binding EF hand family protein		LOC_Os02g14980.1
GRMZM2G088753				-1.1		starch branching enzyme1				AT5G03650	SBE2.2	starch branching enzyme 2.2		LOC_Os06g51084.1
GRMZM2G310569				-1.1		ion channel activity				AT3G02850	SKOR	STELAR K+ outward rectifier		LOC_Os06g14030.1
GRMZM2G101142				-1.1		hypothetical protein LOC100274166				AT3G51420	ATSSL4,SSL4	strictosidine synthase-like 4		LOC_Os07g42250.1
GRMZM2G065083				-1.1		phosphohexose isomerase1				AT5G42740		Sugar isomerase (SIS) family protein		LOC_Os06g14510.1
GRMZM2G149576				-1.1		hypothetical protein LOC100382501				AT2G36630		Sulfite exporter TauE/SafE family protein		LOC_Os03g51650.1
GRMZM2G048672				-1.1		macrophage migration inhibitory factor				AT5G57170		Tautomerase/MIF superfamily protein		LOC_Os06g48600.1
GRMZM2G035594				-1.1		hypothetical protein LOC100384600				AT1G45110		Tetrapyrrole (Corrin/Porphyrin) Methylases		LOC_Os10g27450.1
AC215723.3_FG001				-1.1						AT1G62930.1		Tetratricopeptide repeat (TPR)-like superfamily protein		LOC_Os04g28300.1
GRMZM2G071986				-1.1		hypothetical protein LOC100383228				AT1G34160		Tetratricopeptide repeat (TPR)-like superfamily protein		LOC_Os12g17080.1
GRMZM2G079231				-1.1		hypothetical protein LOC100191472				AT2G36980		Tetratricopeptide repeat (TPR)-like superfamily protein		LOC_Os09g34870.1
GRMZM2G158839				-1.1		Transcribed locus, strongly similar to XP_002454621.1 hypothetical protein SORBIDRAFT_04g034420 [Sorghum bicolor]				AT1G05750	CLB19,PDE247	Tetratricopeptide repeat (TPR)-like superfamily protein		LOC_Os02g53050.1
GRMZM2G436199				-1.1		glycerol ether metabolic process				AT1G50320	ATHX,ATX,THX	thioredoxin X		LOC_Os04g57930.1
GRMZM2G007038				-1.1		translation initiation factor activity				AT1G17220	FUG1	Translation initiation factor 2, small GTP-binding protein		LOC_Os05g49970.2
GRMZM2G047298				-1.1		LOC100276997 (umc1273), mRNA				AT1G29050	TBL38	TRICHOME BIREFRINGENCE-LIKE 38		LOC_Os01g46350.1
GRMZM2G169593				-1.1		product:tryptophan synthase beta-subunit				AT5G54810	ATTSB1,TRP2,TRPB,TSB1	tryptophan synthase beta-subunit 1		LOC_Os08g04180.1
GRMZM2G002652				-1.1		hypothetical protein LOC100279205				AT5G53970		Tyrosine transaminase family protein		LOC_Os11g35040.1
AC210013.4_FG013				-1.1						AT5G62990.1	emb1692	Ubiquitin carboxyl-terminal hydrolase family protein		LOC_Os04g24710.1
GRMZM5G848550				-1.1						AT5G67030	ABA1,ATABA1,ATZEP,IBS3,LOS6,NPQ2,ZEP	zeaxanthin epoxidase (ZEP) (ABA1)		LOC_Os04g37619.1
GRMZM2G100794				-1.1		LOC100191923		C3H		AT3G02830	ZFN1	zinc finger protein 1		LOC_Os11g28270.1
AC188023.3_FG005				-1						AT5G52960.1				LOC_Os05g49410.1
AC217965.2_FG012				-1						AT3G27750.1				LOC_Os04g39970.1
GRMZM2G012126				-1		hypothetical protein LOC100275676				AT4G33780				LOC_Os03g12930.1
GRMZM2G025042				-1		hypothetical protein LOC100191815				AT1G27385				LOC_Os04g31690.1
GRMZM2G032348				-1		hypothetical protein LOC100279568				AT3G24630				LOC_Os01g12840.1
GRMZM2G061442				-1		hypothetical protein LOC100276583				AT1G44920				LOC_Os03g51930.2
GRMZM2G388420				-1						AT1G78995				LOC_Os02g04550.1
GRMZM2G463318				-1
GRMZM5G813783				-1		hypothetical protein LOC100277249 (LOC100277249), mRNA				AT4G33480				LOC_Os04g59570.1
GRMZM5G839422				-1		inner membrane protein ALBINO3				AT2G28800	ALB3	63 kDa inner membrane family protein		LOC_Os01g05800.1
GRMZM2G143756				-1		nucleotide binding				AT3G55090		ABC-2 type transporter family protein		LOC_Os01g61940.1
GRMZM2G009070				-1		hypothetical protein LOC100273534				AT1G63680	ATMURE,MURE,PDE316	acid-amino acid ligases;ligases;ATP binding;ATP binding;ligases		LOC_Os10g40130.1
GRMZM5G840002				-1		3-isopropylmalate dehydratase small subunit 2				AT2G43090		Aconitase/3-isopropylmalate dehydratase protein		LOC_Os02g43830.1
GRMZM2G466281				-1		ethanolaminephosphotransferase				AT1G13560	AAPT1,ATAAPT1	aminoalcoholphosphotransferase 1		LOC_Os02g02750.2
GRMZM2G164669				-1		protein binding				AT2G04740		ankyrin repeat family protein		LOC_Os06g21330.1
GRMZM2G062470				-1		hypothetical protein LOC100278535				AT2G32480	ARASP	ARABIDOPSIS SERIN PROTEASE		LOC_Os03g38230.1
GRMZM2G100118				-1		binding				AT1G51350		ARM repeat superfamily protein		LOC_Os11g41990.1
GRMZM2G024073				-1		thioredoxin-like 6				AT4G29670	ACHT2	atypical CYS HIS rich thioredoxin 2		LOC_Os05g11090.1
GRMZM2G069024				-1		LOC100216811				AT1G02850	BGLU11	beta glucosidase 11		LOC_Os05g30250.1
GRMZM2G071401				-1		histamine receptor activity				AT4G18160	ATKCO6,ATTPK3,KCO6,TPK3	Ca2+ activated outward rectifying K+ channel 6		LOC_Os09g12790.1
GRMZM2G084935				-1		polcalcin Jun o 2				AT1G18210		Calcium-binding EF-hand family protein		LOC_Os06g47640.1
GRMZM2G075974				-1		LOC100284640				AT2G23970		Class I glutamine amidotransferase-like superfamily protein		LOC_Os03g48060.1
GRMZM2G480850				-1		CP12-1				AT2G47400	CP12,CP12-1	CP12 domain-containing protein 1		LOC_Os01g19740.1
GRMZM2G162758				-1		hypothetical protein LOC100217282				AT5G23190	CYP86B1	cytochrome P450, family 86, subfamily B, polypeptide 1		LOC_Os10g34480.1
GRMZM2G022931				-1		LOC100192072				AT5G03170	ATFLA11,FLA11	FASCICLIN-like arabinogalactan-protein 11		LOC_Os01g47780.1
GRMZM2G480516				-1		Putative uncharacterized protein				AT5G22500	FAR1	fatty acid reductase 1		LOC_Os09g39410.1
GRMZM2G122793				-1		ferredoxin reductase activity				AT2G04700		ferredoxin thioredoxin reductase catalytic beta chain family protein		LOC_Os09g07570.1
GRMZM2G007651				-1		FMN binding				AT3G03890		FMN binding		LOC_Os07g38620.1
GRMZM2G113476				-1		Putative uncharacterized protein				AT3G11945	ATHST,HST,PDS2	homogentisate prenyltransferase		LOC_Os07g38850.1
GRMZM2G155077				-1		hsp20/alpha crystallin family protein				AT5G20970		HSP20-like chaperones superfamily protein		LOC_Os01g40550.1
GRMZM2G050548				-1		protein kinase activity				AT2G26730		Leucine-rich repeat protein kinase family protein		LOC_Os01g42294.1
GRMZM2G088196				-1		transmembrane transport				AT4G00370	ANTR2,PHT4;4	Major facilitator superfamily protein		LOC_Os09g39680.1
GRMZM2G141026				-1		LOC100272885				AT4G35150		O-methyltransferase family protein		LOC_Os05g43940.1
GRMZM2G346861				-1		Full-length cDNA clone ZM_BFb0236H08				AT4G38660		Pathogenesis-related thaumatin superfamily protein		LOC_Os03g14030.2
GRMZM2G438524				-1		hypothetical protein LOC100191385				AT5G46580		pentatricopeptide (PPR) repeat-containing protein		LOC_Os03g63910.1
GRMZM2G405581				-1		peroxidase activity				AT5G58400		Peroxidase superfamily protein		LOC_Os02g14170.1
GRMZM2G071288				-1		hypothetical protein LOC100384529				AT5G19750		Peroxisomal membrane 22 kDa (Mpv17/PMP22) family protein		LOC_Os12g03430.1
GRMZM2G092793				-1		sialin				AT2G29650	ANTR1,PHT4;1	phosphate transporter 4;1		LOC_Os01g17240.1
GRMZM2G174984				-1		photosystem II3				AT1G79040	PSBR	photosystem II subunit R		LOC_Os08g10020.2
GRMZM5G861678				-1		phytochromobilin biosynthetic process				AT3G09150	ATHY2,GUN3,HY2	phytochromobilin:ferredoxin oxidoreductase, chloroplast / phytochromobilin synthase (HY2)		LOC_Os01g72090.1
GRMZM2G020196				-1		ubiquitin ligase complex				AT1G29340	ATPUB17,PUB17	plant U-box 17		LOC_Os02g13960.1
GRMZM2G039930				-1		proteolysis				AT3G24590	PLSP1	plastidic type i signal peptidase 1		LOC_Os02g16709.1
GRMZM2G058250				-1		LOC100282000				AT2G38140	PSRP4	plastid-specific ribosomal protein 4		LOC_Os05g09400.2
GRMZM2G117401				-1		hypothetical protein LOC100382371				AT3G16630	ATKINESIN-13A,KINESIN-13A	P-loop containing nucleoside triphosphate hydrolases superfamily protein		LOC_Os05g06280.1
GRMZM2G113241				-1		LOC100277620				AT5G49800		Polyketide cyclase/dehydrase and lipid transport superfamily protein		LOC_Os11g14070.1
GRMZM2G344205				-1		hypothetical protein LOC100191642				AT1G64720	CP5	Polyketide cyclase/dehydrase and lipid transport superfamily protein		LOC_Os02g03230.1
GRMZM2G078210				-1		hypothetical protein LOC100275827				AT4G29310		Protein of unknown function (DUF1005)		LOC_Os01g53790.1
GRMZM2G076962				-1		LOC100194184				AT5G13610		Protein of unknown function (DUF155)		LOC_Os07g49410.2
GRMZM2G003090				-1		LOC100277623				AT2G31560		Protein of unknown function (DUF1685)		LOC_Os12g12880.1
GRMZM2G318010				-1		structural constituent of ribosome				AT2G46915		Protein of unknown function (DUF3754)		LOC_Os06g01460.1
GRMZM2G377131				-1		hypothetical protein LOC100277055				AT2G25690		Protein of unknown function (DUF581)		LOC_Os03g53520.1
GRMZM2G310283				-1		hypothetical protein LOC100280438				AT2G22010	RKP	related to KPC1		LOC_Os07g43380.1
GRMZM2G168335				-1		LOC100281034				AT1G06190		Rho termination factor		LOC_Os03g08480.1
GRMZM2G038833				-1		LOC100281641				AT2G33450		Ribosomal L28 family		LOC_Os05g01110.1
AC217300.3_FG005				-1						AT5G13510.1		Ribosomal protein L10 family protein		LOC_Os03g17580.1
GRMZM2G153476				-1		LOC100283244				AT5G14320		Ribosomal protein S13/S18 family		LOC_Os03g49710.1
AC234157.1_FG002				-1						AT1G74970.1	RPS9,TWN3	ribosomal protein S9		LOC_Os03g55930.1
GRMZM2G131245				-1		ubiquitin-protein ligase/ zinc ion binding protein				AT4G19670		RING/U-box superfamily protein		LOC_Os12g43560.1
GRMZM2G110289				-1		Transcribed locus, strongly similar to XP_002438133.1 hypothetical protein SORBIDRAFT_10g008560 [Sorghum bicolor]				AT1G10510	emb2004	RNI-like superfamily protein		LOC_Os06g13050.1
GRMZM2G010349				-1		protein kinase activity				AT1G68830	STN7	STT7 homolog STN7		LOC_Os05g47560.1
GRMZM2G066749				-1		hypothetical protein LOC100384672 (LOC100384672), mRNA				AT4G01570		Tetratricopeptide repeat (TPR)-like superfamily protein		LOC_Os03g50500.1
GRMZM2G077320				-1		hypothetical protein LOC100216817				AT3G29230		Tetratricopeptide repeat (TPR)-like superfamily protein		LOC_Os12g38880.1
GRMZM2G368755				-1						AT3G57430	OTP84	Tetratricopeptide repeat (TPR)-like superfamily protein		LOC_Os10g33730.1
GRMZM2G455587				-1		MAP kinase activity				AT1G15510	ATECB2,ECB2,VAC1	Tetratricopeptide repeat (TPR)-like superfamily protein		LOC_Os05g49920.1
GRMZM2G372297				-1		hypothetical protein LOC100383955				AT4G27800	PPH1,TAP38	thylakoid-associated phosphatase 38		LOC_Os01g37130.2
GRMZM2G159142				-1		LOC100277615				AT1G33230		TMPIT-like protein		LOC_Os02g01720.1
GRMZM2G033653				-1		ribosomal protein S6 containing protein				AT3G17170	RFC3	Translation elongation factor EF1B/ribosomal protein S6 family protein		LOC_Os12g37610.1
GRMZM2G008859				-1		hypothetical protein LOC100276039				AT2G15290	ATTIC21,CIA5,PIC1,TIC21	translocon at inner membrane of chloroplasts 21		LOC_Os02g09470.1
GRMZM2G403797				-1		hypothetical protein LOC100277394				AT4G01037	AtWTF1,WTF1	Ubiquitin carboxyl-terminal hydrolase family protein		LOC_Os05g49610.1
GRMZM2G043295				-1		hypothetical protein LOC100193773				AT3G16520	UGT88A1	UDP-glucosyl transferase 88A1		LOC_Os01g53350.1
GRMZM2G059363				-1		hypothetical protein LOC100273390				AT2G24020		Uncharacterised BCR, YbaB family COG0718		LOC_Os02g08380.1
GRMZM2G097674				-1		hypothetical protein LOC100273159				AT4G13590		Uncharacterized protein family (UPF0016)		LOC_Os11g34180.1
GRMZM2G128644				-1		hypothetical protein LOC100193660				AT3G56880		VQ motif-containing protein		LOC_Os03g20440.1
AC217293.3_FG007				-1						AT1G21270.1	WAK2	wall-associated kinase 2		LOC_Os10g06090.1
GRMZM2G064663				-1		YGGT family protein				AT5G21920	ATYLMG2,YLMG2	YGGT family protein		LOC_Os03g08080.1
GRMZM2G069106				-1		hypothetical protein LOC100273872				AT5G17790	VAR3	zinc finger (Ran-binding) family protein		LOC_Os01g59980.1
GRMZM2G145715				1		NADPH producing dehydrogenase of the oxidative pentose phosphate pathway				AT3G02360		6-phosphogluconate dehydrogenase family protein		LOC_Os06g02144.1
GRMZM2G173195				1		hypothetical protein LOC100191807				AT2G41540	GPDHC1	6-phosphogluconate dehydrogenase family protein		LOC_Os05g41590.1
GRMZM2G437445				1		protein binding				AT2G37620	AAc1,ACT1	actin 1		LOC_Os01g64630.1
GRMZM2G101287				1		LOC100273466				AT2G21620	RD2	Adenine nucleotide alpha hydrolases-like superfamily protein		LOC_Os02g47650.1
GRMZM2G419305				1		DNA binding				AT1G68580		agenet domain-containing protein / bromo-adjacent homology (BAH) domain-containing protein		LOC_Os08g33420.1
GRMZM2G079109				1		abhydrolase domain-containing protein 5				AT4G24160		alpha/beta-Hydrolases superfamily protein		LOC_Os09g34860.1
AC225193.3_FG003				1						AT2G33620.1		AT hook motif DNA-binding family protein		LOC_Os10g42230.1
GRMZM2G098904				1		LOC100192650		bZIP		AT5G24800	ATBZIP9,BZIP9,BZO2H2	basic leucine zipper 9		LOC_Os02g16680.1
GRMZM2G092129				1		hypothetical protein LOC100384434				AT3G61050	NTMC2T4,NTMC2TYPE4	Calcium-dependent lipid-binding (CaLB domain) family protein		LOC_Os07g22640.1
GRMZM2G456217				1		LOC100284911				AT5G50260		Cysteine proteinases superfamily protein		LOC_Os08g44270.1
GRMZM2G068465				1		hypothetical protein LOC100191975				AT1G11680	CYP51,CYP51A2,CYP51G1,EMB1738	CYTOCHROME P450 51G1		LOC_Os11g32240.1
GRMZM2G108384				1		LOC100284321				AT3G04970		DHHC-type zinc finger family protein		LOC_Os03g24900.1
GRMZM2G020772				1		hypothetical protein LOC100381953		MYB		AT2G38090		Duplicated homeodomain-like superfamily protein		LOC_Os01g04930.1
AC234201.1_FG003				1						AT5G63910.1	FCLY	farnesylcysteine lyase		LOC_Os04g59630.1
GRMZM2G118312				1		galactoside 2-alpha-L-fucosyltransferase activity				AT2G03220	ATFT1,ATFUT1,FT1,MUR2	fucosyltransferase 1		LOC_Os02g17534.1
GRMZM2G103939				1		core alpha 1,3-fucosyltransferase				AT3G19280	ATFUT11,FUCT1,FUCTA,FUT11	fucosyltransferase 11		LOC_Os08g36840.1
GRMZM2G096705				1		hypothetical protein LOC100194092				AT4G32720	AtLa1,La1	La protein 1		LOC_Os04g42010.1
GRMZM2G064594				1		hypothetical protein LOC100273980				AT2G15230	ATLIP1,LIP1	lipase 1		LOC_Os09g01590.1
GRMZM2G017426				1		hypothetical protein LOC100304309				AT5G09670		loricrin-related		LOC_Os04g38525.1
GRMZM2G131321				1		LOC100282505				AT2G39960		Microsomal signal peptidase 25 kDa subunit (SPC25)		LOC_Os04g36859.1
GRMZM2G176903				1		LOC100191240				AT1G60690		NAD(P)-linked oxidoreductase superfamily protein		LOC_Os01g43090.1
GRMZM2G342039				1		protein binding				AT1G32340	NHL8	NDR1/HIN1-like 8		LOC_Os04g50720.1
GRMZM2G097190				1		nucleotide-binding protein 1				AT5G50960	ATNBP35,NBP35	nucleotide binding protein 35		LOC_Os04g40880.3
GRMZM2G090981				1		hypothetical protein LOC100279801				AT5G51740		Peptidase family M48 family protein		LOC_Os02g50230.1
GRMZM2G106810				1		hypothetical protein LOC100274102				AT1G16560		Per1-like family protein		LOC_Os05g13330.1
GRMZM5G862817				1		TSA: Zea mays contig34841, mRNA sequence				AT2G02230	AtPP2-B1,PP2-B1	phloem protein 2-B1		LOC_Os02g56840.1
GRMZM2G043782				1		presenilin				AT1G08700	PS1	Presenilin-1		LOC_Os01g16930.1
GRMZM2G042380				1		protein kinase activity				AT3G09830		Protein kinase superfamily protein		LOC_Os02g57420.1
GRMZM2G179336				1		TSA: Zea mays contig19983, mRNA sequence				AT5G59020		Protein of unknown function (DUF3527)		LOC_Os03g16070.1
GRMZM2G111232				1		catalytic activity				AT4G28400		Protein phosphatase 2C family protein		LOC_Os04g52000.1
GRMZM2G377904				1		catalytic activity				AT4G33920		Protein phosphatase 2C family protein		LOC_Os03g55320.1
GRMZM2G128744				1		catalytic activity				AT1G55880		Pyridoxal-5\'-phosphate-dependent enzyme family protein		LOC_Os03g11660.1
GRMZM2G330430				1		GTP binding				AT4G17170	AT-RAB2,ATRAB-B1B,ATRAB2A,ATRABB1C,RAB-B1B,RAB2A,RABB1C	RAB GTPase homolog B1C		LOC_Os02g37420.1
GRMZM2G466835				1		hypothetical protein LOC100384111				AT4G04220	AtRLP46,RLP46	receptor like protein 46		LOC_Os08g16580.1
GRMZM2G169994				1		protein binding				AT4G03510	ATRMA1,RMA1	RING membrane-anchor 1		LOC_Os04g44820.1
GRMZM2G092244				1		hypothetical protein LOC100193667				AT4G32600		RING/U-box superfamily protein		LOC_Os05g08610.1
GRMZM2G148908				1		LOC100217218				AT3G47160		RING/U-box superfamily protein		LOC_Os10g30850.2
GRMZM2G047949				1		nucleotide binding				AT2G06990	HEN2	RNA helicase, ATP-dependent, SK12/DOB1 protein
GRMZM2G092182				1		hypothetical protein LOC100194222				AT4G26480		RNA-binding KH domain-containing protein		LOC_Os02g49080.1
GRMZM2G057131				1		RWP-RK domain containing protein		RWP-RK		AT4G35590		RWP-RK domain-containing protein		LOC_Os04g47640.1
GRMZM2G109429				1		LOC100282317				AT1G05720		selenoprotein family protein		LOC_Os01g66960.1
GRMZM2G109425				1		hypothetical protein LOC100193477				AT3G02530		TCP-1/cpn60 chaperonin family protein		LOC_Os05g05470.1
GRMZM2G089361				1		TSA: Zea mays contig58656, mRNA sequence		TCP		AT4G18390	TCP2	TEOSINTE BRANCHED 1, cycloidea and PCF transcription factor 2		LOC_Os03g57190.1
GRMZM2G074567				1		hypothetical protein LOC100280047				AT2G30050		transducin family protein / WD-40 repeat family protein		LOC_Os07g14280.1
GRMZM2G062154				1		tubby protein		TUB		AT1G53320	AtTLP7,TLP7	tubby like protein 7		LOC_Os01g48370.1
GRMZM2G070138				1		protein CYPRO4				AT4G33400		Vacuolar import/degradation, Vid27-related protein		LOC_Os02g54780.1
GRMZM2G049211				1		Clone 1062541 mRNA sequence				AT3G52850	ATELP,ATELP1,ATVSR1,BP-80,BP80,BP80-1;1,BP80B,GFS1,VSR1,VSR1;1	vacuolar sorting receptor homolog 1		LOC_Os03g21720.1
GRMZM2G059937				1		outer mitochondrial membrane protein porin				AT5G57490	ATVDAC4,VDAC4	voltage dependent anion channel 4		LOC_Os03g04460.1
GRMZM2G009144				1.1		hypothetical protein LOC100276181				AT3G21710				LOC_Os07g34020.1
GRMZM2G021885				1.1		Hypothetical protein LOC100279663				AT1G50660				LOC_Os04g53350.1
GRMZM2G055309				1.1		LOC100192710				AT3G07510				LOC_Os10g09930.1
GRMZM2G076810				1.1		hypothetical protein LOC100384419 (LOC100384419), mRNA								LOC_Os11g11980.1
GRMZM2G138077				1.1		hypothetical protein LOC100192888				AT1G56420				LOC_Os12g37390.1
GRMZM2G315769				1.1		hypothetical protein LOC100383263								LOC_Os05g39860.1
GRMZM2G356618				1.1		LOC100277495								LOC_Os12g04540.1
GRMZM2G370081				1.1		proteinaceous extracellular matrix				AT1G74160				LOC_Os07g41200.1
GRMZM2G566804				1.1
GRMZM5G812356				1.1						AT3G02420				LOC_Os05g51140.2
GRMZM5G869482				1.1		Transcribed locus, strongly similar to XP_002464124.1 hypothetical protein SORBIDRAFT_01g012790 [Sorghum bicolor]				AT1G60995				LOC_Os03g45770.1
GRMZM5G896560				1.1		GTP binding
GRMZM2G093557				1.1		LOC100282612				AT4G24820		26S proteasome, regulatory subunit Rpn7;Proteasome component (PCI) domain		LOC_Os04g40850.1
GRMZM2G136662				1.1		protein binding				AT1G13180	ARP3,ATARP3,DIS1	Actin-like ATPase superfamily protein		LOC_Os08g03440.1
GRMZM2G164649				1.1		ATPase				AT4G30490		AFG1-like ATPase family protein		LOC_Os08g16480.1
GRMZM2G118800				1.1		hypothetical protein LOC100382449				AT1G44170	ALDH3H1,ALDH4	aldehyde dehydrogenase 3H1		LOC_Os11g08300.1
GRMZM2G057823				1.1		aldolase1				AT2G36460		Aldolase superfamily protein		LOC_Os05g33380.1
GRMZM5G853854				1.1		oxidoreductase activity				AT4G18360		Aldolase-type TIM barrel family protein		LOC_Os04g53210.3
GRMZM2G152739				1.1		triglyceride lipase activity				AT3G52430	ATPAD4,PAD4	alpha/beta-Hydrolases superfamily protein		LOC_Os11g09010.3
GRMZM2G163796				1.1						AT3G04710		ankyrin repeat family protein		LOC_Os03g47650.1
GRMZM2G437912				1.1		hypothetical protein LOC100193934				AT1G08250	ADT6	arogenate dehydratase 6		LOC_Os04g33390.1
GRMZM2G475263				1.1		DNA binding				AT2G46530	ARF11	auxin response factor 11		LOC_Os01g13520.1
GRMZM2G089596				1.1		Hypothetical protein LOC100194340				AT1G05710		basic helix-loop-helix (bHLH) DNA-binding superfamily protein		LOC_Os04g41570.1
GRMZM2G025812				1.1		LOC100280864		bZIP		AT1G42990	ATBZIP60,BZIP60	basic region/leucine zipper motif 60		LOC_Os06g41770.1
GRMZM2G149150				1.1		hypothetical protein LOC100384258		bZIP		AT4G38900		Basic-leucine zipper (bZIP) transcription factor family protein		LOC_Os08g43090.1
GRMZM5G899390				1.1		serine/threonine-protein phosphatase PP1				AT3G05580		Calcineurin-like metallo-phosphoesterase superfamily protein		LOC_Os01g24750.1
GRMZM2G074689				1.1		LOC100274368				AT4G32060		calcium-binding EF hand family protein		LOC_Os04g42430.1
GRMZM2G039650				1.1		double-stranded RNA binding				AT5G01270	ATCPL2,CPL2	carboxyl-terminal domain (ctd) phosphatase-like 2		LOC_Os01g63820.2
GRMZM2G025592				1.1		DNA cytosine methyltransferase MET2a				AT1G69770	CMT3	chromomethylase 3		LOC_Os03g12570.1
GRMZM2G167613				1.1		hypothetical protein LOC100216819				AT4G39330	ATCAD9,CAD9	cinnamyl alcohol dehydrogenase 9		LOC_Os04g15920.1
GRMZM2G466298				1.1		protein kinase activity				AT5G55830		Concanavalin A-like lectin protein kinase family protein		LOC_Os02g48210.1
GRMZM2G140817				1.1		hypothetical protein LOC100274274				AT2G40890	CYP98A3	cytochrome P450, family 98, subfamily A, polypeptide 3		LOC_Os05g41440.1
GRMZM2G314652				1.1		3-dehydroquinate dehydratase activity				AT3G06350	EMB3004,MEE32	dehydroquinate dehydratase, putative / shikimate dehydrogenase, putative		LOC_Os01g27750.1
GRMZM2G703749				1.1		zinc ion binding				AT1G69420		DHHC-type zinc finger family protein		LOC_Os10g19180.1
GRMZM5G812923				1.1		LOC100191148				AT3G08950		electron transport SCO1/SenC family protein		LOC_Os02g06480.2
GRMZM2G145024				1.1		cytoskeleton				AT3G03610		ELMO/CED-12 family protein		LOC_Os03g20670.1
GRMZM2G132185				1.1		ethylene-responsive transcription factor 4		AP2-EREBP		AT5G44210	ATERF-9,ATERF9,ERF9	erf domain protein 9		LOC_Os01g58420.1
GRMZM2G025491				1.1		hypothetical protein LOC100384018				AT2G03200		Eukaryotic aspartyl protease family protein		LOC_Os06g10670.1
GRMZM2G125544				1.1		hypothetical protein LOC100280323				AT1G49050		Eukaryotic aspartyl protease family protein		LOC_Os02g49800.1
GRMZM2G090573				1.1		hypothetical protein LOC100191392				AT5G49830	EXO84B	exocyst complex component 84B		LOC_Os07g10110.1
GRMZM2G083317				1.1		protein binding protein				AT5G52340	ATEXO70A2,EXO70A2	exocyst subunit exo70 family protein A2		LOC_Os11g05880.1
GRMZM2G163200				1.1		transcription factor activity		C2C2-GATA		AT5G25830	GATA12	GATA transcription factor 12		LOC_Os02g56250.1
GRMZM2G087150				1.1		lipid metabolic process				AT1G28590		GDSL-like Lipase/Acylhydrolase superfamily protein		LOC_Os01g46080.1
GRMZM2G020096				1.1		hypothetical protein LOC100381846				AT4G23100	ATECS1,CAD2,GSH1,GSHA,PAD2,RML1	glutamate-cysteine ligase		LOC_Os05g03820.1
GRMZM2G005849				1.1		sugar binding				AT3G24090		glutamine-fructose-6-phosphate transaminase (isomerizing)s;sugar binding;transaminases		LOC_Os12g03720.1
GRMZM2G178261				1.1		LOC100285734		GRF		AT2G22840	AtGRF1,GRF1	growth-regulating factor 1		LOC_Os03g51970.1
GRMZM2G117507				1.1		Rab GDP-dissociation inhibitor activity				AT2G44100	AT-GDI1,ATGDI1,GDI1	guanosine nucleotide diphosphate dissociation inhibitor 1		LOC_Os05g23860.1
GRMZM2G178797				1.1		guanylyl cyclase-like protein				AT5G05930	ATGC1,GC1	guanylyl cyclase 1		LOC_Os05g37950.1
GRMZM2G372398				1.1		Transcribed locus, strongly similar to XP_002468152.1 hypothetical protein SORBIDRAFT_01g040530 [Sorghum bicolor]				AT1G18260		HCP-like superfamily protein		LOC_Os03g15350.1
GRMZM2G118485				1.1		hypothetical protein LOC100191641		HSF		AT4G17750	ATHSF1,ATHSFA1A,HSF1,HSFA1A	heat shock factor 1		LOC_Os03g12370.1
GRMZM2G023232				1.1		hypothetical protein LOC100217188				AT1G79920		Heat shock protein 70 (Hsp 70) family protein		LOC_Os01g08560.1
GRMZM2G022318				1.1		hypothetical protein LOC100382282				AT3G06130		Heavy metal transport/detoxification superfamily protein		LOC_Os11g05010.1
GRMZM2G149335				1.1		hypothetical protein LOC100275167				AT1G48620	HON5	high mobility group A5		LOC_Os03g50355.1
GRMZM2G081892				1.1		pathogenesis-related transcriptional activator PTI6		AP2-EREBP		AT1G68550		Integrase-type DNA-binding superfamily protein		LOC_Os01g04020.1
GRMZM2G391794				1.1		protein kinase activity				AT1G09970	LRR XI-23,RLK7	Leucine-rich receptor-like protein kinase family protein		LOC_Os12g43640.1
GRMZM2G070322				1.1		systemin receptor SR160				AT3G22800		Leucine-rich repeat (LRR) family protein		LOC_Os03g58110.1
AC217401.3_FG003				1.1						AT5G10290.1		leucine-rich repeat transmembrane protein kinase family protein		LOC_Os03g49620.2
GRMZM2G144985				1.1		serine palmitoyltransferase 1				AT4G36480	ATLCB1,EMB2779,FBR11,LCB1	long-chain base1		LOC_Os03g14800.4
GRMZM5G879665				1.1		carboxy-lyase				AT2G37210		lysine decarboxylase family protein		LOC_Os10g33900.1
GRMZM2G004259				1.1		mitochondrial ribosomal protein L43				AT3G59650		mitochondrial ribosomal protein L51/S25/CI-B8 family protein		LOC_Os03g10930.1
GRMZM2G161299				1.1		hypothetical protein LOC100191354				AT4G26180		Mitochondrial substrate carrier family protein		LOC_Os02g13300.1
GRMZM2G084477				1.1		MPPN domain containing protein (LOC100285840), mRNA				AT3G16310		mitotic phosphoprotein N\' end (MPPN) family protein		LOC_Os05g44380.1
GRMZM2G143886				1.1		metabolic process				AT4G21580		oxidoreductase, zinc-binding dehydrogenase family protein		LOC_Os02g56180.1
GRMZM2G024865				1.1		LOC100283156				AT1G06870		Peptidase S24/S26A/S26B/S26C family protein		LOC_Os09g28000.1
GRMZM2G060257				1.1		Transcribed locus, moderately similar to NP_001149956.1 ATPP2-A13 [Zea mays]				AT3G61060	AtPP2-A13,PP2-A13	phloem protein 2-A13		LOC_Os10g37830.1
GRMZM2G168087				1.1		dual specificity protein phosphatase Diacylglycerol kinase, catalytic region				AT2G35680		Phosphotyrosine protein phosphatases superfamily protein		LOC_Os01g64010.1
GRMZM2G387528				1.1		hypothetical protein LOC100279991 (LOC100279991), mRNA				AT1G09530	PAP3,PIF3,POC1	phytochrome interacting factor 3		LOC_Os05g04740.2
GRMZM2G130239				1.1		hypothetical protein LOC100194168				AT3G55350		PIF / Ping-Pong family of plant transposases		LOC_Os01g40070.1
GRMZM2G168257				1.1		LOC100280451				AT2G45010		PLAC8 family protein		LOC_Os03g01210.1
GRMZM2G017089				1.1		LOC100282926				AT4G15900	PRL1	pleiotropic regulatory locus 1		LOC_Os03g21990.1
GRMZM2G060183				1.1		hypothetical protein LOC100279532				AT3G18830	ATPLT5,ATPMT5,PMT5	polyol/monosaccharide transporter 5		LOC_Os12g32940.1
GRMZM2G439203				1.1		hypothetical protein LOC100280207				AT5G15860	ATPCME,PCME	prenylcysteine methylesterase		LOC_Os06g49440.1
GRMZM2G094541				1.1		hypothetical protein LOC100273808				AT4G00960		Protein kinase superfamily protein		LOC_Os10g12620.1
GRMZM2G472625				1.1		hypothetical protein LOC100193185				AT4G18710	ATSK21,BIN2,DWF12,SK21,UCU1	Protein kinase superfamily protein		LOC_Os01g10840.1
GRMZM2G430152				1.1						AT3G24740		Protein of unknown function (DUF1644)		LOC_Os06g47860.2
GRMZM2G086856				1.1		Putative uncharacterized protein				AT2G15760		Protein of unknown function (DUF1645)		LOC_Os07g42740.1
GRMZM2G075262				1.1		hypothetical protein LOC100383889				AT5G05190		Protein of unknown function (DUF3133)		LOC_Os03g21640.1
GRMZM2G163067				1.1		hypothetical protein LOC100277698				AT5G47060		Protein of unknown function (DUF581)		LOC_Os04g49660.1
GRMZM2G180021				1.1		hypothetical protein LOC100276367				AT1G29980		Protein of unknown function, DUF642		LOC_Os01g55190.1
GRMZM2G104468				1.1		Putative uncharacterized protein				AT2G02170		Remorin family protein		LOC_Os03g02840.1
GRMZM2G099797				1.1		response regulator 8		ARR-B		AT4G16110	ARR2,RR2	response regulator 2		LOC_Os03g12350.1
GRMZM2G041344				1.1		protein binding				AT4G33565		RING/U-box superfamily protein		LOC_Os02g36330.1
GRMZM2G023028				1.1		DNA-directed RNA polymerase II 14.5 kDa polypeptide				AT3G16980	NRPB9A,NRPD9A,NRPE9A	RNA polymerases M/15 Kd subunit		LOC_Os12g37370.1
GRMZM2G005659				1.1		nucleosome				AT5G46840		RNA-binding (RRM/RBD/RNP motifs) family protein		LOC_Os03g63730.1
GRMZM5G899787				1.1		nucleic acid binding				AT3G20930		RNA-binding (RRM/RBD/RNP motifs) family protein		LOC_Os02g49820.1
GRMZM2G006216				1.1		hypothetical protein LOC100304233				AT2G43320		S-adenosyl-L-methionine-dependent methyltransferases superfamily protein		LOC_Os04g41500.1
GRMZM2G106105				1.1		LSM7-like				AT2G03870		Small nuclear ribonucleoprotein family protein		LOC_Os08g08040.1
GRMZM2G000278				1.1		hypothetical LOC542190				AT1G60940	SNRK2-10,SNRK2.10,SRK2B	SNF1-related protein kinase 2.10		LOC_Os02g34600.1
GRMZM2G052581				1.1		LOC100273699				AT5G02820	BIN5,RHL2	Spo11/DNA topoisomerase VI, subunit A protein		LOC_Os03g17610.1
GRMZM2G162525				1.1		hypothetical protein LOC100193970				AT1G48410	AGO1	Stabilizer of iron transporter SufD / Polynucleotidyl transferase		LOC_Os04g47870.1
GRMZM2G050730				1.1		pop3 peptide				AT5G22580		Stress responsive A/B Barrel Domain		LOC_Os11g05290.1
GRMZM2G057466				1.1		Transcribed locus, strongly similar to NP_001174899.1 Os06g0612150 [Oryza sativa Japonica Group]				AT5G46910		Transcription factor jumonji (jmj) family protein / zinc finger (C5HC2 type) family protein		LOC_Os10g42690.1
GRMZM2G049091				1.1		ATP binding protein				AT1G75510		Transcription initiation factor IIF, beta subunit		LOC_Os05g43450.1
GRMZM2G060284				1.1		hypothetical protein LOC100216909				AT1G75510		Transcription initiation factor IIF, beta subunit		LOC_Os05g43450.1
GRMZM2G081013				1.1		LOC100286183				AT4G18905		Transducin/WD40 repeat-like superfamily protein		LOC_Os01g69970.1
AC217358.3_FG011				1.1						AT3G20920.1		translocation protein-related		LOC_Os02g23890.1
GRMZM2G025906				1.1		hypothetical protein LOC100194302				AT5G47420		Tryptophan RNA-binding attenuator protein-like		LOC_Os03g53600.1
GRMZM2G053574				1.1		LOC100191426				AT4G15420		Ubiquitin fusion degradation UFD1 family protein		LOC_Os01g35040.1
GRMZM2G181378				1.1		hypothetical protein LOC100279774				AT4G12570	UPL5	ubiquitin protein ligase 5		LOC_Os09g31090.2
GRMZM2G115049				1.1		voltage-dependent anion channel protein 2				AT5G15090	ATVDAC3,VDAC3	voltage dependent anion channel 3		LOC_Os05g45950.1
GRMZM2G063566				1.1		hypothetical protein LOC100217032				AT5G57560	TCH4,XTH22	Xyloglucan endotransglucosylase/hydrolase family protein		LOC_Os08g13920.1
GRMZM2G309568				1.1		protein serine/threonine kinase activity				AT1G21651		zinc ion binding		LOC_Os05g34880.1
GRMZM2G076437				1.2		LOC100278812				AT1G36380
GRMZM2G104456				1.2		nucleolin								LOC_Os02g09140.1
GRMZM2G139565				1.2		hypothetical protein LOC100277664				AT5G26230				LOC_Os05g32440.1
GRMZM2G162508				1.2		fatty acid elongase				AT2G26640	KCS11	3-ketoacyl-CoA synthase 11		LOC_Os10g28060.1
GRMZM2G093347				1.2		LOC100282568				AT1G27450	APT1,ATAPT1	adenine phosphoribosyl transferase 1		LOC_Os12g39860.1
GRMZM2G021816				1.2		LOC100285670				AT3G12050		Aha1 domain-containing protein		LOC_Os08g36150.1
AC218900.3_FG001				1.2						AT1G47480.1		alpha/beta-Hydrolases superfamily protein		LOC_Os08g37060.1
GRMZM2G074759				1.2		catalytic activity				AT3G48990		AMP-dependent synthetase and ligase family protein		LOC_Os04g58710.1
GRMZM2G024948				1.2		DNA binding		ABI3VP1		AT2G46870	NGA1	AP2/B3-like transcriptional factor family protein		LOC_Os02g45850.1
GRMZM2G132712				1.2		hypothetical protein LOC100383276				AT5G57110	ACA8,AT-ACA8	autoinhibited Ca2+ -ATPase, isoform 8		LOC_Os08g40530.1
GRMZM2G121715				1.2		LOC100283046				AT4G00330	CRCK2	calmodulin-binding receptor-like cytoplasmic kinase 2		LOC_Os03g61060.2
GRMZM2G013236				1.2		signal transduction				AT1G30270	ATCIPK23,CIPK23,LKS1,SnRK3.23	CBL-interacting protein kinase 23		LOC_Os07g05620.2
GRMZM2G312226				1.2						AT1G02360		Chitinase family protein		LOC_Os10g39730.1
GRMZM2G036861				1.2		LOC100272984				AT1G48850	EMB1144	chorismate synthase, putative / 5-enolpyruvylshikimate-3-phosphate phospholyase, putative		LOC_Os03g14990.1
GRMZM2G032282				1.2		coproporphyrinogen oxidase activity				AT1G03475	ATCPO-I,HEMF1,LIN2	Coproporphyrinogen III oxidase		LOC_Os04g52130.1
GRMZM2G120839				1.2		DNA binding				AT3G55950	ATCRR3,CCR3	CRINKLY4 related 3		LOC_Os05g03620.1
GRMZM2G010933				1.2		copper ion binding				AT3G15352	ATCOX17,COX17	cytochrome c oxidase 17		LOC_Os02g55134.1
GRMZM5G898471				1.2		hypothetical protein LOC100383011				AT3G08970	ATERDJ3A,TMS1	DNAJ heat shock N-terminal domain-containing protein		LOC_Os03g18200.1
GRMZM2G028218				1.2		dnaJ protein				AT5G22060	ATJ2,J2	DNAJ homologue 2		LOC_Os03g57340.1
GRMZM5G866918				1.2		LOC100277354				AT3G28970	AAR3	Domain of unknown function (DUF298)		LOC_Os07g43720.1
GRMZM2G013128				1.2		TSA: Zea mays contig59172, mRNA sequence				AT3G52490		Double Clp-N motif-containing P-loop nucleoside triphosphate hydrolases superfamily protein		LOC_Os04g23220.1
GRMZM2G033746				1.2		type I hypersensitivity				AT2G45830	DTA2	downstream target of AGL15 2		LOC_Os04g45140.1
GRMZM2G069018				1.2		hypothetical protein LOC100193039				AT3G05700		Drought-responsive family protein		LOC_Os01g48190.1
GRMZM5G847466				1.2		calmodulin				AT1G18530		EF hand calcium-binding protein family		LOC_Os05g50180.1
GRMZM2G052422				1.2		hypothetical protein LOC100191321				AT1G05010	ACO4,EAT1,EFE	ethylene-forming enzyme		LOC_Os02g53180.2
GRMZM2G031930				1.2		hypothetical protein LOC100193496				AT2G22475	GEM	GRAM domain family protein		LOC_Os06g11430.1
GRMZM2G072855				1.2		histone H4				AT3G53730		Histone superfamily protein		LOC_Os10g39410.1
GRMZM2G314898				1.2		LOC100283536				AT3G62160		HXXXD-type acyl-transferase family protein		LOC_Os01g09010.1
GRMZM2G141679				1.2		DNA binding		AP2-EREBP		AT4G39780		Integrase-type DNA-binding superfamily protein		LOC_Os09g20350.1
GRMZM2G435034				1.2		hypothetical protein LOC100383866				AT4G24290		MAC/Perforin domain-containing protein		LOC_Os07g07194.1
GRMZM2G396451				1.2		transcription factor activity				AT2G38700	ATMVD1,MVD1	mevalonate diphosphate decarboxylase 1		LOC_Os04g51920.1
GRMZM2G388576				1.2						AT5G23540		Mov34/MPN/PAD-1 family protein		LOC_Os05g30800.1
GRMZM2G112681				1.2		DNA binding		NAC		AT4G29230	anac075,NAC075	NAC domain containing protein 75		LOC_Os01g09550.1
GRMZM2G017603				1.2		hypothetical protein LOC100279616				AT3G14470		NB-ARC domain-containing disease resistance protein		LOC_Os05g34230.1
GRMZM2G047652				1.2		nucleotide binding				AT4G26090	RPS2	NB-ARC domain-containing disease resistance protein		LOC_Os01g58530.1
GRMZM2G068350				1.2		hypothetical protein LOC100192819				AT1G27600	I9H,IRX9-L	Nucleotide-diphospho-sugar transferases superfamily protein		LOC_Os04g01280.1
GRMZM2G009157				1.2		cell redox homeostasis				AT1G21750	ATPDI5,ATPDIL1-1,PDI5,PDIL1-1	PDI-like 1-1		LOC_Os10g24954.1
GRMZM2G015869				1.2		cystinosin				AT5G40670		PQ-loop repeat family protein / transmembrane family protein		LOC_Os12g18110.1
GRMZM2G059671				1.2		LOC100191496				AT5G03730	AtCTR1,CTR1,SIS1	Protein kinase superfamily protein		LOC_Os02g32610.2
GRMZM2G415772				1.2		hypothetical protein LOC100275175				AT1G25370		Protein of unknown function (DUF1639)		LOC_Os01g49410.1
GRMZM2G111394				1.2						AT2G26530	AR781	Protein of unknown function (DUF1645)		LOC_Os06g11150.1
GRMZM5G801369				1.2		LOC100284062				AT1G13000		Protein of unknown function (DUF707)		LOC_Os01g68260.1
GRMZM2G044382				1.2		catalytic/ protein phosphatase type 2C				AT1G47380		Protein phosphatase 2C family protein		LOC_Os04g37660.1
GRMZM2G026649				1.2		endoplasmic reticulum				AT3G54120		Reticulon family protein		LOC_Os01g63240.1
GRMZM2G083515				1.2		protein binding				AT5G44280	ATRING1A,RING1A	RING 1A		LOC_Os01g58400.2
GRMZM2G017940				1.2		hypothetical protein LOC100381443				AT3G07550		RNI-like superfamily protein		LOC_Os11g16280.1
GRMZM2G314679				1.2		LOC541628				AT4G08520		SNARE-like superfamily protein		LOC_Os02g21250.1
GRMZM2G063850				1.2		Full-length cDNA clone ZM_BFc0073G17				AT1G62740		stress-inducible protein, putative		LOC_Os02g43020.1
GRMZM2G063420				1.2		LOC100276126				AT4G14600		Target SNARE coiled-coil domain protein		LOC_Os07g38990.1
GRMZM2G043127				1.2		Transcribed locus				AT1G49410	TOM6	translocase of the outer mitochondrial membrane 6		LOC_Os03g42799.1
GRMZM2G046529				1.2		membrane				AT3G57280		Transmembrane proteins 14C		LOC_Os06g19690.1
GRMZM2G153999				1.2		Transcribed locus, strongly similar to NP_001168819.1 hypothetical protein LOC100382624 [Zea mays]				AT5G05240		Uncharacterised conserved protein (UCP030365)		LOC_Os02g03940.1
GRMZM2G034551				1.2		ZIP zinc/iron transport family protein				AT2G30080	ATZIP6,ZIP6	ZIP metal ion transporter family		LOC_Os05g07210.1
GRMZM2G145063				1.2		proteolysis				AT1G67420		Zn-dependent exopeptidases superfamily protein		LOC_Os07g19530.1
AC191009.3_FG004				1.3						AT5G47870.1				LOC_Os03g63450.1
GRMZM2G031420				1.3		Putative uncharacterized protein				AT5G20165
GRMZM2G073347				1.3		TSA: Zea mays contig22388, mRNA sequence								LOC_Os05g41500.1
GRMZM2G090788				1.3		hypothetical protein LOC100278306				AT5G16520				LOC_Os01g01040.1
GRMZM2G128466				1.3		Hypothetical protein LOC100279437
GRMZM2G145583				1.3		hypothetical protein LOC100278674
GRMZM2G491845				1.3
GRMZM2G117614				1.3		LOC100279085				AT5G07360		Amidase family protein		LOC_Os11g33090.1
GRMZM2G139329				1.3		hypothetical protein LOC100191243				AT2G41460	ARP	apurinic endonuclease-redox protein		LOC_Os01g58690.1
GRMZM2G038281				1.3		beta-galactosidase				AT5G63810	BGAL10	beta-galactosidase 10		LOC_Os01g65460.1
GRMZM2G137286				1.3		hydrolase activity				AT3G05580		Calcineurin-like metallo-phosphoesterase superfamily protein		LOC_Os01g24750.1
GRMZM2G350225				1.3						AT5G53750		CBS domain-containing protein		LOC_Os10g35630.1
GRMZM2G038485				1.3		LOC100282062				AT2G27970	CKS2	CDK-subunit 2		LOC_Os03g05300.1
GRMZM5G873586				1.3		protein kinase activity				AT4G23150	CRK7	cysteine-rich RLK (RECEPTOR-like protein kinase) 7		LOC_Os11g39490.1
GRMZM2G337845				1.3		protein folding				AT5G22060	ATJ2,J2	DNAJ homologue 2		LOC_Os03g57340.1
GRMZM2G027462				1.3		hypothetical protein LOC100274309				AT2G28380	DRB2	dsRNA-binding protein 2		LOC_Os10g33970.1
GRMZM2G410782				1.3		intracellular				AT2G38410		ENTH/VHS/GAT family protein		LOC_Os05g39760.1
GRMZM2G174554				1.3		hypothetical protein LOC100192078				AT5G39940		FAD/NAD(P)-binding oxidoreductase family protein		LOC_Os12g44160.1
GRMZM2G094579				1.3		transferase activity, transferring glycosyl groups				AT3G18180		Glycosyltransferase family 61 protein		LOC_Os02g04250.1
GRMZM2G174673				1.3		metal ion transport				AT3G06130		Heavy metal transport/detoxification superfamily protein		LOC_Os11g05010.1
GRMZM2G405662				1.3		metal ion transport				AT1G01490		Heavy metal transport/detoxification superfamily protein		LOC_Os10g38870.1
GRMZM2G027958				1.3		hypothetical protein LOC100274364				AT2G31880	EVR,SOBIR1	Leucine-rich repeat protein kinase family protein		LOC_Os06g18000.1
GRMZM2G017792				1.3		hypothetical protein LOC100272353				AT3G45640	ATMAPK3,ATMPK3,MPK3	mitogen-activated protein kinase 3		LOC_Os03g17700.1
GRMZM2G005452				1.3		NBS-LRR type disease resistance protein				AT3G07040	RPM1,RPS3	NB-ARC domain-containing disease resistance protein		LOC_Os11g11990.1
GRMZM2G452954				1.3		ATP binding				AT3G46730		NB-ARC domain-containing disease resistance protein		LOC_Os08g28540.1
GRMZM5G898898				1.3		nucleotide binding				AT3G46730		NB-ARC domain-containing disease resistance protein		LOC_Os12g37770.1
GRMZM2G313481				1.3		LOC100191821				AT1G14590		Nucleotide-diphospho-sugar transferase family protein		LOC_Os03g63270.1
GRMZM2G134889				1.3		protein disulfide isomerase3				AT5G60640	ATPDI2,ATPDIL1-4,PDI2,PDIL1-4	PDI-like 1-4		LOC_Os02g01010.1
GRMZM2G139828				1.3		hypothetical protein LOC100191454				AT3G16850		Pectin lyase-like superfamily protein		LOC_Os11g43750.1
GRMZM2G126261				1.3		LOC100101533				AT5G05340		Peroxidase superfamily protein		LOC_Os07g48050.1
GRMZM2G051677				1.3		fructokinase 2				AT4G10260		pfkB-like carbohydrate kinase family protein		LOC_Os08g02120.1
GRMZM2G180490				1.3		protein binding				AT3G49900		Phototropic-responsive NPH3 family protein		LOC_Os07g39850.1
GRMZM2G062541				1.3		nucleus		bHLH		AT1G09530	PAP3,PIF3,POC1	phytochrome interacting factor 3		LOC_Os05g04740.2
GRMZM2G086403				1.3		hypothetical protein LOC100277728		PLATZ		AT1G32700		PLATZ transcription factor family protein		LOC_Os04g50120.1
GRMZM2G136538				1.3		LOC100274889				AT2G15730		P-loop containing nucleoside triphosphate hydrolases superfamily protein		LOC_Os03g27760.1
GRMZM2G055982				1.3		structural constituent of ribosome				AT2G05940		Protein kinase superfamily protein		LOC_Os06g10160.1
GRMZM2G119725				1.3		hypothetical protein LOC100273464				AT1G67850		Protein of unknown function (DUF707)		LOC_Os02g19510.1
AC218035.3_FG001				1.3						AT5G49820.1	EMB1879,RUS6	Protein of unknown function, DUF647		LOC_Os05g34650.1
GRMZM2G013465				1.3		hypothetical protein LOC100279581				AT5G25510		Protein phosphatase 2A regulatory B subunit family protein		LOC_Os01g08310.1
GRMZM2G441541				1.3		peroxidase activity				AT5G47910	ATRBOHD,RBOHD	respiratory burst oxidase homologue D		LOC_Os11g33120.1
GRMZM2G007288				1.3		hypothetical protein LOC100276421				AT1G78420		RING/U-box superfamily protein		LOC_Os02g14720.1
GRMZM2G087728				1.3		hypothetical protein LOC100384003				AT5G45890	SAG12	senescence-associated gene 12		LOC_Os09g38920.1
GRMZM2G004582				1.3		hydrolase activity				AT5G63870	ATPP7,PP7	serine/threonine phosphatase 7		LOC_Os08g40200.1
GRMZM2G091558				1.3		hypothetical protein LOC100274280				AT5G27430		Signal peptidase subunit		LOC_Os09g38370.1
GRMZM5G806784				1.3		TSA: Zea mays contig02002, mRNA sequence				AT2G02370		SNARE associated Golgi protein family		LOC_Os03g25750.1
GRMZM2G149108				1.3		LOC100284284				AT4G24940	AT-SAE1-1,ATSAE1A,SAE1A	SUMO-activating enzyme 1A		LOC_Os11g30410.1
GRMZM2G161493				1.3		metabolic process				AT5G52560	ATUSP,USP	UDP-sugar pyrophosphorylase		LOC_Os06g48760.1
GRMZM2G139852				1.3		Hypothetical protein LOC100381746				AT4G16442		Uncharacterised protein family (UPF0497)		LOC_Os03g10030.1
GRMZM2G164141				1.3		purine base metabolic process				AT2G26230		uricase / urate oxidase / nodulin 35, putative		LOC_Os01g64520.1
GRMZM2G126413				1.3		structural constituent of ribosome				AT4G39720		VQ motif-containing protein		LOC_Os09g20460.1
GRMZM2G151763				1.3		hypothetical protein LOC100383722		WRKY		AT4G18170	ATWRKY28,WRKY28	WRKY DNA-binding protein 28		LOC_Os01g47560.1
GRMZM2G046155				1.4		TSA: Zea mays contig47880, mRNA sequence
GRMZM2G146173				1.4		hypothetical protein LOC100191733								LOC_Os09g38400.1
GRMZM2G150859				1.4						AT1G22030				LOC_Os01g65420.1
GRMZM5G879872				1.4		hypothetical protein LOC100272905								LOC_Os02g57350.1
GRMZM2G368411				1.4		iron ion binding				AT4G25420	AT2301,ATGA20OX1,GA20OX1,GA5	2-oxoglutarate (2OG) and Fe(II)-dependent oxygenase superfamily protein		LOC_Os01g66100.1
GRMZM2G070034				1.4		hypothetical protein LOC100382583				AT2G45660	AGL20,ATSOC1,SOC1	AGAMOUS-like 20		LOC_Os10g39130.1
GRMZM2G141848				1.4		adenosine 5'-phosphosulfate reductase6				AT3G03860	APRL5,ATAPRL5	APR-like 5		LOC_Os12g35640.1
GRMZM2G029065				1.4		hypothetical protein LOC100192880				AT4G12080	AHL1,ATAHL1	AT-hook motif nuclear-localized protein 1		LOC_Os02g03270.1
GRMZM2G131961				1.4		transcription factor activity		bZIP		AT5G65210	TGA1	bZIP transcription factor family protein		LOC_Os04g54474.1
GRMZM2G061537				1.4		protein kinase activity				AT2G11520	CRCK3	calmodulin-binding receptor-like cytoplasmic kinase 3		LOC_Os09g03620.1
GRMZM2G071871				1.4		nucleic acid binding				AT4G31180		Class II aminoacyl-tRNA and biotin synthetases superfamily protein		LOC_Os02g46130.1
GRMZM2G120814				1.4		snRK1-interacting protein 1				AT1G71310		cobalt ion binding		LOC_Os01g65560.1
GRMZM2G074634				1.4		LOC100285337				AT3G22260		Cysteine proteinases superfamily protein		LOC_Os02g07210.1
GRMZM2G458095				1.4		hypothetical protein LOC100273892				AT3G50930	BCS1	cytochrome BC1 synthesis		LOC_Os01g42030.1
GRMZM2G181551				1.4		Putative uncharacterized protein				AT2G41430	CID1,ERD15,LSR1	dehydration-induced protein (ERD15)		LOC_Os03g23010.2
GRMZM2G082976				1.4		derlin2-1				AT4G04860	DER2.2	DERLIN-2.2		LOC_Os03g63520.1
GRMZM2G469901				1.4		protein folding				AT4G39150		DNAJ heat shock N-terminal domain-containing protein		LOC_Os01g50700.1
GRMZM2G414140				1.4		protein folding				AT3G44110	ATJ,ATJ3	DNAJ homologue 3		LOC_Os03g57340.1
GRMZM2G177227				1.4		hypothetical protein LOC100192942				AT5G50380	ATEXO70F1,EXO70F1	exocyst subunit exo70 family protein F1		LOC_Os01g67820.1
GRMZM2G099101				1.4		endo-1,4-beta-glucanase				AT5G49720	ATGH9A1,DEC,GH9A1,IRX2,KOR,KOR1,RSW2,TSD1	glycosyl hydrolase 9A1		LOC_Os03g21210.1
GRMZM2G447347				1.4		transferase activity, transferring glycosyl groups				AT3G18180		Glycosyltransferase family 61 protein		LOC_Os02g22650.2
GRMZM2G020040				1.4		ATP binding				AT4G16660		heat shock protein 70 (Hsp 70) family protein		LOC_Os02g48110.1
GRMZM2G043932				1.4		metal ion binding protein				AT1G01490		Heavy metal transport/detoxification superfamily protein		LOC_Os04g57200.1
GRMZM2G341404				1.4		dnaJ subfamily C member 7				AT5G03160	ATP58IPK,P58IPK	homolog of mamallian P58IPK		LOC_Os01g74580.1
GRMZM2G092578				1.4		LOC100280583				AT4G14420		HR-like lesion-inducing protein-related		LOC_Os03g05520.1
GRMZM2G046885				1.4		m26 protein		MADS		AT2G22540	AGL22,SVP	K-box region and MADS-box transcription factor family protein		LOC_Os02g52340.1
GRMZM2G176394				1.4		receptor protein kinase CLAVATA1				AT4G18670		Leucine-rich repeat (LRR) family protein		LOC_Os07g07990.1
GRMZM2G080851				1.4		hypothetical protein LOC100192366				AT1G79620		Leucine-rich repeat protein kinase family protein		LOC_Os05g24010.1
GRMZM2G059214				1.4		protein kinase activity				AT1G34420		leucine-rich repeat transmembrane protein kinase family protein		LOC_Os12g08180.1
GRMZM2G099984				1.4		hydrophobic protein LTI6B				AT3G05880	RCI2A	Low temperature and salt responsive protein family		LOC_Os05g04700.1
GRMZM2G078757				1.4		structural constituent of ribosome				AT2G13100		Major facilitator superfamily protein		LOC_Os06g08170.1
GRMZM2G178533				1.4		hypothetical protein LOC100381673				AT2G37790		NAD(P)-linked oxidoreductase superfamily protein		LOC_Os01g62880.1
GRMZM2G308064				1.4		ATP binding				AT3G07040	RPM1,RPS3	NB-ARC domain-containing disease resistance protein		LOC_Os08g14850.1
GRMZM2G163494				1.4		high affinity nitrate transporter				AT5G50200	ATNRT3.1,NRT3.1,WR3	nitrate transmembrane transporters		LOC_Os02g38230.1
GRMZM2G144581				1.4		membrane				AT4G10850		Nodulin MtN3 family protein		LOC_Os02g19820.1
GRMZM2G133226				1.4		hypothetical protein LOC100272770				AT4G32272		Nucleotide/sugar transporter family protein		LOC_Os02g40030.1
GRMZM2G114126				1.4		hypothetical protein LOC100272570				AT5G59420	ORP3C	OSBP(oxysterol binding protein)-related protein 3C		LOC_Os03g16690.1
GRMZM2G072578				1.4		hypothetical protein LOC100191566				AT2G06925	ATSPLA2-ALPHA,PLA2-ALPHA	Phospholipase A2 family protein		LOC_Os03g50030.1
GRMZM2G166903				1.4		LOC100279618				AT5G18480	PGSIP6	plant glycogenin-like starch initiation protein 6		LOC_Os02g41520.1
AC215690.3_FG002				1.4						AT2G43710.1	FAB2,SSI2	Plant stearoyl-acyl-carrier-protein desaturase family protein		LOC_Os04g31070.1
GRMZM2G071478				1.4		hypothetical protein LOC100383329				AT2G23770		protein kinase family protein / peptidoglycan-binding LysM domain-containing protein		LOC_Os11g35330.1
GRMZM2G029184				1.4		fiber protein Fb34				AT1G68220		Protein of unknown function (DUF1218)		LOC_Os08g16130.1
GRMZM2G181637				1.4		hypothetical protein LOC100194275				AT1G31720		Protein of unknown function (DUF1218)		LOC_Os02g47450.1
GRMZM2G010298				1.4		LOC100191167				AT3G15260		Protein phosphatase 2C family protein		LOC_Os07g32380.1
GRMZM2G136765				1.4		LOC100281394				AT1G16220		Protein phosphatase 2C family protein		LOC_Os04g25570.1
GRMZM2G458075				1.4		protein kinase activity				AT1G11300		protein serine/threonine kinases;protein kinases;ATP binding;sugar binding;kinases;carbohydrate binding		LOC_Os10g02360.1
GRMZM2G171595				1.4		hypothetical protein LOC100383385				AT2G02170		Remorin family protein		LOC_Os03g02840.1
GRMZM2G031280				1.4		protein binding				AT1G20823		RING/U-box superfamily protein		LOC_Os04g49550.1
GRMZM2G101116				1.4		hypothetical protein LOC100217274				AT2G43120		RmlC-like cupins superfamily protein		LOC_Os08g27720.1
GRMZM2G015049				1.4		hypothetical protein LOC100381449				AT1G75580		SAUR-like auxin-responsive protein family		LOC_Os06g04590.1
GRMZM2G156470				1.4		auxin induced protein				AT1G29500		SAUR-like auxin-responsive protein family		LOC_Os09g37470.1
GRMZM2G312201				1.4		DNA binding				AT2G22410	SLO1	SLOW GROWTH 1		LOC_Os01g60000.1
GRMZM2G177314				1.4		ATP-binding cassette sub-family G member 2				AT1G17840	ABCG11,ATWBC11,COF1,DSO,WBC11	white-brown complex homolog protein 11		LOC_Os10g35180.1
GRMZM2G064608				1.4		LOC100284130				AT3G54826		Zim17-type zinc finger protein		LOC_Os02g57430.1
AC177924.2_FG003				1.5										LOC_Os04g31760.1
GRMZM2G009019				1.5		DNA binding protein
GRMZM2G052920				1.5		hypothetical protein LOC100277463								LOC_Os02g15540.1
GRMZM2G066197				1.5		adhesive/proline-rich protein
GRMZM2G104231				1.5		regulatory protein
GRMZM2G119287				1.5		Transcribed locus, moderately similar to XP_002451026.1 hypothetical protein SORBIDRAFT_05g022870 [Sorghum bicolor]				AT3G63430				LOC_Os11g37670.1
GRMZM2G134396				1.5		hypothetical protein LOC100384797
GRMZM2G323287				1.5		Hypothetical protein LOC100274640
GRMZM2G380015				1.5		hypothetical protein LOC100276468								LOC_Os03g11480.1
GRMZM5G823135				1.5		hypothetical protein LOC100275696								LOC_Os06g49700.1
GRMZM2G099010				1.5		catalytic activity				AT5G09430		alpha/beta-Hydrolases superfamily protein		LOC_Os10g22960.1
GRMZM2G386643				1.5		hypothetical protein LOC100381735				AT4G11610		C2 calcium/lipid-binding plant phosphoribosyltransferase family protein		LOC_Os04g58720.1
GRMZM2G001221				1.5		LOC100283705				AT5G24270	ATSOS3,CBL4,SOS3	Calcium-binding EF-hand family protein		LOC_Os05g45810.1
GRMZM2G140633				1.5		nucleus				AT5G65420	CYCD4;1	CYCLIN D4;1		LOC_Os09g29100.1
GRMZM2G154414				1.5		cyclin-dependent protein kinase inhibitor activity				AT1G49620	ICK5,ICN6,KRP7	Cyclin-dependent kinase inhibitor family protein		LOC_Os11g40030.1
GRMZM2G070553				1.5		structural constituent of ribosome				AT5G18590		Galactose oxidase/kelch repeat superfamily protein		LOC_Os11g43590.4
GRMZM2G150256				1.5		maize insect resistance2				AT5G43060		Granulin repeat cysteine protease family protein		LOC_Os04g57440.1
GRMZM2G152470				1.5		LOC541875				AT3G63250	ATHMT-2,HMT-2,HMT2	homocysteine methyltransferase 2		LOC_Os12g41390.1
GRMZM2G152781				1.5		YLS9				AT2G35460		Late embryogenesis abundant (LEA) hydroxyproline-rich glycoprotein family		LOC_Os12g06220.1
GRMZM2G135547				1.5		hypothetical protein LOC100276868				AT5G64550		loricrin-related		LOC_Os06g27830.1
AC152495.1_FG010				1.5						AT3G14460.1		LRR and NB-ARC domains-containing disease resistance protein		LOC_Os01g57340.1
GRMZM2G165746				1.5		hypothetical protein LOC100194020				AT5G15640		Mitochondrial substrate carrier family protein		LOC_Os01g22600.1
GRMZM2G060464				1.5		nucleoside diphosphate kinase				AT1G17410		Nucleoside diphosphate kinase family protein		LOC_Os02g35700.1
GRMZM2G414047				1.5		hypothetical protein LOC100384312				AT3G54950	PLA IIIA,PLP7	patatin-like protein 6		LOC_Os03g43880.1
GRMZM2G163826				1.5		hypothetical protein LOC100304265				AT3G56960	PIP5K4	phosphatidyl inositol monophosphate 5 kinase 4		LOC_Os07g46490.1
GRMZM2G003411				1.5		nucleotide binding				AT1G15520	ABCG40,ATABCG40,ATPDR12,PDR12	pleiotropic drug resistance 12		LOC_Os02g11760.1
GRMZM2G065665				1.5		serine-type endopeptidase activity				AT5G66960		Prolyl oligopeptidase family protein		LOC_Os09g29950.1
GRMZM2G051270				1.5		ATP sulfurylase				AT4G14680	APS3	Pseudouridine synthase/archaeosine transglycosylase-like family protein		LOC_Os03g53230.1
GRMZM2G105253				1.5		LOC100194277				AT4G38430	ATROPGEF1,ROPGEF1	rho guanyl-nucleotide exchange factor 1		LOC_Os09g37270.1
GRMZM2G112285				1.5		nucleic acid binding				AT1G49600	ATRBP47A,RBP47A	RNA-binding protein 47A		LOC_Os04g37690.1
GRMZM2G057113				1.5		LOC100277589				AT2G43320		S-adenosyl-L-methionine-dependent methyltransferases superfamily protein		LOC_Os04g41500.1
GRMZM5G889999				1.5		kinase interacting kinase1				AT4G21390	B120	S-locus lectin protein kinase family protein		LOC_Os07g36590.1
GRMZM2G089425				1.6		TSA: Zea mays contig49309, mRNA sequence
GRMZM2G147221				1.6		cellulase containing protein								LOC_Os05g15510.1
GRMZM2G162460				1.6		TSA: Zea mays contig09105, mRNA sequence				AT3G53490				LOC_Os03g17440.1
GRMZM2G172159				1.6
GRMZM2G700331				1.6		connexon complex
GRMZM5G803404				1.6						AT5G60740		ABC transporter family protein		LOC_Os04g11820.1
GRMZM2G019799				1.6		catalytic activity				AT3G43600	AAO2,AO3,AOgamma,atAO-2,AtAO3	aldehyde oxidase 2		LOC_Os03g57680.1
GRMZM2G127150				1.6		cationic amino acid transporter				AT3G13620		Amino acid permease family protein		LOC_Os03g25920.1
GRMZM2G178182				1.6		nucleus		bHLH		AT5G50915		basic helix-loop-helix (bHLH) DNA-binding superfamily protein		LOC_Os09g33580.1
GRMZM2G134023				1.6		LOC100217252				AT3G61460	BRH1	brassinosteroid-responsive RING-H2		LOC_Os02g45780.1
GRMZM2G044963				1.6		calmodulin				AT2G27030	ACAM-2,CAM5	calmodulin 5		LOC_Os07g48780.1
GRMZM2G358059				1.6		calreticulin2				AT1G56340	AtCRT1a,CRT1,CRT1a	calreticulin 1a		LOC_Os07g14270.3
GRMZM2G009506				1.6		serine/threonine-protein kinase receptor				AT4G23180	CRK10,RLK4	cysteine-rich RLK (RECEPTOR-like protein kinase) 10		LOC_Os02g48080.1
GRMZM2G086964				1.6		protein folding				AT3G62600	ATERDJ3B,ERDJ3B	DNAJ heat shock family protein		LOC_Os05g06440.1
GRMZM2G161019				1.6		hypothetical protein LOC100193691				AT1G36050		Endoplasmic reticulum vesicle transporter protein		LOC_Os05g41120.1
GRMZM2G072586				1.6		hypothetical protein LOC100274878				AT3G59210		F-box/RNI-like superfamily protein		LOC_Os02g06520.1
GRMZM2G153991				1.6		FK506-binding protein 2-1				AT3G25220	FKBP15-1	FK506-binding protein 15 kD-1		LOC_Os01g68710.1
GRMZM2G365810				1.6						AT5G14780	FDH	formate dehydrogenase		LOC_Os06g29220.1
GRMZM2G140669				1.6		GATA zinc finger family protein		C2C2-GATA		AT4G36240	GATA7	GATA transcription factor 7		LOC_Os02g43150.1
GRMZM2G121237				1.6		hypothetical protein LOC100275551				AT5G04500		glycosyltransferase family protein 47		LOC_Os05g46260.1
GRMZM2G055704				1.6		metal ion transport				AT1G01490		Heavy metal transport/detoxification superfamily protein		LOC_Os12g23280.4
GRMZM2G161780				1.6		integral to membrane				AT4G37680	HHP4	heptahelical protein 4		LOC_Os03g13040.1
GRMZM2G060210				1.6		transferase activity, transferring acyl groups other than amino-acyl groups				AT3G62160		HXXXD-type acyl-transferase family protein		LOC_Os05g08640.1
GRMZM2G356076				1.6		protein kinase activity				AT1G74360		Leucine-rich repeat protein kinase family protein		LOC_Os07g40630.1
GRMZM2G026447				1.6		MAC/Perforin domain containing protein				AT1G14780		MAC/Perforin domain-containing protein		LOC_Os02g27480.1
GRMZM2G170016				1.6		heme binding				AT3G48890	ATMAPR3,ATMP2,MAPR3,MSBP2	membrane-associated progesterone binding protein 3		LOC_Os02g42740.1
GRMZM2G079632				1.6		hypothetical protein LOC100273749		NAC		AT5G08790	anac081,ATAF2	NAC (No Apical Meristem) domain transcriptional regulator superfamily protein		LOC_Os07g12340.1
GRMZM2G055216				1.6		hypothetical protein LOC100384530				AT1G21070		Nucleotide-sugar transporter family protein		LOC_Os07g39280.1
GRMZM2G163421				1.6		protein disulfide isomerase				AT1G77510	ATPDI6,ATPDIL1-2,PDI6,PDIL1-2	PDI-like 1-2		LOC_Os11g09280.1
GRMZM2G093776				1.6		catalytic activity				AT2G28890	PLL4	poltergeist like 4		LOC_Os03g60650.1
GRMZM2G334165				1.6		DNA binding				AT1G70740		Protein kinase superfamily protein		LOC_Os09g24330.1
GRMZM2G172485				1.6		LOC100275369				AT5G05190		Protein of unknown function (DUF3133)		LOC_Os07g48280.1
GRMZM2G012413				1.6		hypothetical protein LOC100191296				AT4G35730		Regulator of Vps4 activity in the MVB pathway protein		LOC_Os09g37510.1
GRMZM2G113135				1.6		hypothetical protein LOC100191931				AT2G46690		SAUR-like auxin-responsive protein family		LOC_Os10g36703.1
GRMZM2G151656				1.6		SAUR52 - auxin-responsive SAUR family member				AT1G29500		SAUR-like auxin-responsive protein family		LOC_Os09g37470.1
GRMZM2G009627				1.6		hypothetical protein LOC100194325				AT5G64630	FAS2,MUB3.9,NFB01,NFB1	Transducin/WD40 repeat-like superfamily protein		LOC_Os08g01680.1
GRMZM2G305439				1.6		Transcribed locus, moderately similar to XP_002456067.1 hypothetical protein SORBIDRAFT_03g029760 [Sorghum bicolor]				AT5G15890	TBL21	TRICHOME BIREFRINGENCE-LIKE 21		LOC_Os01g46410.1
GRMZM2G075780				1.6		LOC100278810				AT1G67780		Zinc-finger domain of monoamine-oxidase A repressor R1 protein		LOC_Os05g23530.1
GRMZM2G065829				1.7		Hypothetical protein LOC100194332		MYB-related						LOC_Os05g51160.1
GRMZM2G060727				1.7
GRMZM2G114816				1.7		Putative uncharacterized protein								LOC_Os08g41840.1
GRMZM2G443525				1.7		nucleotide binding				AT4G33300	ADR1-L1	ADR1-like 1		LOC_Os12g39620.3
GRMZM2G357620				1.7		catalytic activity				AT3G57330	ACA11	autoinhibited Ca2+-ATPase 11		LOC_Os12g04220.1
GRMZM2G156238				1.7		Transcribed locus, moderately similar to NP_001046658.1 Os02g0313700 [Oryza sativa Japonica Group]				AT1G53590	NTMC2T6.1,NTMC2TYPE6.1	Calcium-dependent lipid-binding (CaLB domain) family protein		LOC_Os02g20970.1
GRMZM2G317770				1.7		hypothetical protein LOC100279924				AT3G21630	CERK1,LYSM RLK1	chitin elicitor receptor kinase 1		LOC_Os08g42580.1
GRMZM2G169890				1.7		superoxide dismutase4				AT1G08830	CSD1	copper/zinc superoxide dismutase 1		LOC_Os03g22810.1
GRMZM2G479038				1.7		cytokinin-O-glucosyltransferase 3				AT2G36800	DOGT1,UGT73C5	don-glucosyltransferase 1		LOC_Os10g09990.1
GRMZM2G036365				1.7		aspartic-type endopeptidase activity				AT2G03200		Eukaryotic aspartyl protease family protein		LOC_Os01g50170.1
GRMZM2G111657				1.7		protein binding protein				AT3G29400	ATEXO70E1,EXO70E1	exocyst subunit exo70 family protein E1		LOC_Os01g55799.1
GRMZM2G149024				1.7		transferase, transferring glycosyl groups				AT3G50760	GATL2	galacturonosyltransferase-like 2		LOC_Os03g47530.1
GRMZM2G111872				1.7		hypothetical protein LOC100304361				AT5G50740		Heavy metal transport/detoxification superfamily protein		LOC_Os02g30650.1
GRMZM2G105307				1.7		TSA: Zea mays contig53130, mRNA sequence				AT4G28820		HIT-type Zinc finger family protein		LOC_Os01g61430.1
GRMZM2G467640				1.7		hypothetical protein LOC100278683				AT2G33490		hydroxyproline-rich glycoprotein family protein		LOC_Os04g32370.1
GRMZM2G412436				1.7		homoiothermy				AT3G53040		late embryogenesis abundant protein, putative / LEA protein, putative		LOC_Os02g15250.1
GRMZM5G898755				1.7		nonspecific lipid-transfer protein 4				AT2G38540	ATLTP1,LP1,LTP1	lipid transfer protein 1		LOC_Os11g02369.1
GRMZM2G087275				1.7		biosynthetic process				AT4G36480	ATLCB1,EMB2779,FBR11,LCB1	long-chain base1		LOC_Os03g14800.4
AC215181.3_FG004				1.7						AT1G18350.1	ATMKK7,BUD1,MKK7	MAP kinase kinase 7		LOC_Os03g50550.1
GRMZM2G172512				1.7		TSA: Zea mays contig21447, mRNA sequence				AT1G45248		Nucleolar histone methyltransferase-related protein		LOC_Os09g02690.1
GRMZM2G091481				1.7		protein disulfide isomerase				AT1G21750	ATPDI5,ATPDIL1-1,PDI5,PDIL1-1	PDI-like 1-1		LOC_Os11g09280.1
GRMZM2G147210				1.7		cell redox homeostasis				AT1G77510	ATPDI6,ATPDIL1-2,PDI6,PDIL1-2	PDI-like 1-2		LOC_Os11g09280.1
GRMZM2G144109				1.7		catalytic activity				AT2G28890	PLL4	poltergeist like 4		LOC_Os03g60650.1
GRMZM2G180876				1.7		protein binding				AT1G14740		Protein of unknown function (DUF1423)		LOC_Os03g13590.1
GRMZM2G429840				1.7						AT5G05190		Protein of unknown function (DUF3133)		LOC_Os05g40170.1
GRMZM2G166064				1.7		hypothetical protein LOC100275570				AT5G02390		Protein of unknown function (DUF3741)		LOC_Os01g05660.1
GRMZM2G082293				1.7						AT2G19090		Protein of unknown function (DUF630 and DUF632)		LOC_Os08g40830.1
GRMZM2G138698				1.7		acid phosphatase activity				AT5G50400	ATPAP27,PAP27	purple acid phosphatase 27		LOC_Os01g58640.1
GRMZM2G150098				1.7		pyruvate kinase, cytosolic isozyme				AT5G08570		Pyruvate kinase family protein		LOC_Os04g58110.1
GRMZM2G364375				1.7		protein kinase activity				AT4G21380	ARK3,RK3	receptor kinase 3		LOC_Os01g57510.1
GRMZM2G087326				1.7		hypothetical protein LOC100274298				AT5G15650	ATRGP2,RGP2	reversibly glycosylated polypeptide 2		LOC_Os03g40270.1
GRMZM2G319634				1.7		catalytic activity				AT4G31460		Ribosomal L28 family		LOC_Os07g36090.1
AC220972.3_FG001				1.7						AT2G42360.1		RING/U-box superfamily protein		LOC_Os01g20910.1
GRMZM2G018820				1.7		hypothetical protein LOC100191201				AT3G02040	SRG3	senescence-related gene 3		LOC_Os02g31030.1
GRMZM2G176029				1.7		hypothetical protein LOC100216965				AT1G14360	ATUTR3,UTR3	UDP-galactose transporter 3		LOC_Os06g39260.1
GRMZM2G112190				1.7		cell wall				AT1G32170	XTH30,XTR4	xyloglucan endotransglucosylase/hydrolase 30		LOC_Os02g46910.1
AC209898.2_FG004				1.8										LOC_Os06g49700.1
GRMZM2G003937				1.8		TSA: Zea mays contig32092, mRNA sequence
GRMZM2G015818				1.8										LOC_Os06g09020.1
GRMZM2G043489				1.8		hypothetical protein LOC100280168				AT1G74160				LOC_Os07g41200.1
GRMZM2G054588				1.8		hypothetical protein LOC100275257 (LOC100275257), mRNA				AT4G08330				LOC_Os05g39060.1
GRMZM2G099136				1.8		hypothetical protein LOC100277953				AT1G24270				LOC_Os02g30420.1
GRMZM2G134878				1.8		Hypothetical protein LOC100277371				AT5G35090				LOC_Os06g43810.1
GRMZM2G342738				1.8		hypothetical protein LOC100276940								LOC_Os06g40210.1
GRMZM2G399073				1.8		hypothetical protein LOC100274819								LOC_Os06g50350.1
GRMZM2G443939				1.8		protein binding								LOC_Os01g57340.1
GRMZM2G006943				1.8		metallopeptidase activity				AT4G33090	APM1,ATAPM1	aminopeptidase M1		LOC_Os09g19790.1
GRMZM2G132116				1.8		hypothetical protein LOC100191291				AT4G32830	AtAUR1,AUR1	ataurora1		LOC_Os01g09580.2
GRMZM2G321239				1.8		CDPK protein				AT4G35310	ATCPK5,CPK5	calmodulin-domain protein kinase 5		LOC_Os04g49510.1
GRMZM2G055575				1.8		hypothetical protein LOC100381968				AT1G01140	CIPK9,PKS6,SnRK3.12	CBL-interacting protein kinase 9		LOC_Os03g03510.1
GRMZM2G363429				1.8		monooxygenase activity				AT1G19630	CYP722A1	cytochrome P450, family 722, subfamily A, polypeptide 1		LOC_Os05g01120.1
GRMZM2G493395				1.8		catalytic activity				AT4G15560	CLA,CLA1,DEF,DXPS2,DXS	Deoxyxylulose-5-phosphate synthase		LOC_Os07g09190.1
GRMZM2G071705				1.8		cyclin-like F-box				AT2G26850		F-box family protein		LOC_Os01g59180.1
GRMZM2G440543				1.8		F-box protein GID2				AT5G48170	SLY2	F-box family protein		LOC_Os03g10040.1
AC231745.1_FG003				1.8						AT5G45910.1		GDSL-like Lipase/Acylhydrolase superfamily protein		LOC_Os06g06290.1
GRMZM2G343828				1.8		hydrolase activity, hydrolyzing O-glycosyl compounds				AT1G78060		Glycosyl hydrolase family protein		LOC_Os11g19210.1
GRMZM2G017223				1.8		acid phosphatase activity				AT2G38600		HAD superfamily, subfamily IIIB acid phosphatase		LOC_Os03g21480.1
GRMZM2G181153				1.8		histone H4				AT5G59970		Histone superfamily protein		LOC_Os09g38020.1
GRMZM2G129189				1.8		endochitinase PR4				AT3G54420	ATCHITIV,ATEP3,CHIV,EP3	homolog of carrot EP3-3 chitinase		LOC_Os02g39330.1
GRMZM2G082302				1.8		nucleic acid binding				AT2G31510	ARI7,ATARI7	IBR domain-containing protein		LOC_Os09g38630.1
GRMZM2G039187				1.8		IQ calmodulin-binding motif family protein				AT4G14750	IQD19	IQ-domain 19		LOC_Os03g43580.1
GRMZM2G070673				1.8		Clone 298819 mRNA sequence				AT4G14750	IQD19	IQ-domain 19		LOC_Os10g28420.1
GRMZM2G151567				1.8		protein binding				AT1G56145		Leucine-rich repeat transmembrane protein kinase		LOC_Os08g10300.1
GRMZM2G477491				1.8		protein kinase activity				AT3G13530	MAP3KE1,MAPKKK7	mitogen-activated protein kinase kinase kinase 7		LOC_Os04g56530.1
GRMZM2G458533				1.8		Clone 380951 mRNA sequence				AT3G17030		Nucleic acid-binding proteins superfamily		LOC_Os03g61700.1
GRMZM2G034828				1.8		microtubule motor activity				AT3G23670	KINESIN-12B,PAKRP1L	phragmoplast-associated kinesin-related protein, putative		LOC_Os03g39020.1
AC233979.1_FG006				1.8						AT5G47060.1		Protein of unknown function (DUF581)		LOC_Os04g49620.1
GRMZM2G149952				1.8		product:ATP sulfurylase				AT4G14680	APS3	Pseudouridine synthase/archaeosine transglycosylase-like family protein		LOC_Os03g53230.1
GRMZM2G058954				1.8		hypothetical protein LOC100384162				AT2G19490		recA DNA recombination family protein		LOC_Os01g67510.1
GRMZM2G429940				1.8		CBL-interacting serine/threonine-protein kinase 15				AT4G30960	ATCIPK6,CIPK6,SIP3,SNRK3.14	SOS3-interacting protein 3		LOC_Os08g34240.1
GRMZM2G375153				1.8		hypothetical protein LOC100191688				AT3G60220	ATL4,TL4	TOXICOS EN LEVADURA 4		LOC_Os02g46340.1
GRMZM2G305822				1.8		ubiquitin ligase complex				AT5G57035		U-box domain-containing protein kinase family protein		LOC_Os06g37620.1
GRMZM2G072894				1.8		TSA: Zea mays contig31117, mRNA sequence				AT1G32230	ATP8,CEO,CEO1,RCD1	WWE protein-protein interaction domain protein family		LOC_Os03g63770.1
GRMZM2G047759				1.9						AT5G67390				LOC_Os03g55400.1
GRMZM2G063431				1.9		LOC100275673								LOC_Os01g45470.1
GRMZM2G111451				1.9		hypothetical protein LOC100274234				AT4G39630				LOC_Os08g19370.1
GRMZM5G812228				1.9		catalytic activity				AT4G23850	LACS4	AMP-dependent synthetase and ligase family protein		LOC_Os06g06350.2
GRMZM2G115834				1.9		intracellular				AT1G19980		cytomatrix protein-related		LOC_Os04g02680.1
GRMZM2G458718				1.9						AT2G24420		DNA repair ATPase-related		LOC_Os08g40790.1
GRMZM2G102069				1.9		hypothetical protein LOC100381631				AT3G13060	ECT5	evolutionarily conserved C-terminal region 5		LOC_Os04g51940.1
GRMZM2G162020				1.9		homoiothermy				AT4G00820	iqd17	IQ-domain 17		LOC_Os08g02250.1
GRMZM2G092465				1.9		DNA binding		NAC		AT2G46770	ANAC043,EMB2301,NST1	NAC (No Apical Meristem) domain transcriptional regulator superfamily protein		LOC_Os08g02300.1
GRMZM5G822317				1.9		SAG20				AT5G05350		PLAC8 family protein		LOC_Os05g27570.1
GRMZM2G038855				1.9		Clone 400411 mRNA sequence				AT3G55990	ESK1,TBL29	Plant protein of unknown function (DUF828)		LOC_Os12g01380.1
AC208201.3_FG002				1.9						AT2G30020.1		Protein phosphatase 2C family protein		LOC_Os03g18150.1
GRMZM2G134054				1.9		acid phosphatase activity				AT3G07130	ATPAP15,PAP15	purple acid phosphatase 15		LOC_Os03g63074.1
GRMZM2G093962				1.9		serine-type endopeptidase activity				AT1G63120	ATRBL2,RBL2	RHOMBOID-like 2		LOC_Os03g02530.1
AC185593.3_FG003				1.9						AT4G35783.1	DVL17,RTFL6	ROTUNDIFOLIA like 6		LOC_Os05g08620.1
GRMZM2G045243				1.9		hypothetical protein LOC100192664				AT5G20820		SAUR-like auxin-responsive protein family		LOC_Os09g26590.1
GRMZM2G025414				1.9		BCL-2 binding anthanogene-1				AT5G14360		Ubiquitin-like superfamily protein		LOC_Os01g67950.1
GRMZM2G117007				1.9		nucleic acid binding				AT5G58620		zinc finger (CCCH-type) family protein		LOC_Os05g03760.1
GRMZM2G031033				2		hypothetical protein LOC100278780				AT3G10020				LOC_Os11g05170.1
GRMZM2G038640				2		Hypothetical protein LOC100275441				AT5G16950				LOC_Os06g08510.1
GRMZM2G064631				2		mazG nucleotide pyrophosphohydrolase domain protein (LOC100284231), mRNA				AT3G25400				LOC_Os04g43550.1
GRMZM2G423669				2		hypothetical protein LOC100275047
GRMZM2G121210				2		hypothetical protein LOC100381789				AT3G10690	GYRA	DNA GYRASE A		LOC_Os02g47150.1
GRMZM2G089995				2		ethylene-responsive transcription factor 4		AP2-EREBP		AT3G20310	ATERF-7,ATERF7,ERF7	ethylene response factor 7		LOC_Os04g52090.1
GRMZM2G453575				2						AT4G22030		F-box family protein with a domain of unknown function (DUF295)		LOC_Os02g13220.1
GRMZM2G067000				2						AT1G19250	FMO1	flavin-dependent monooxygenase 1		LOC_Os04g14690.1
GRMZM2G463904				2		protein kinase activity				AT2G26330	ER,QRP1	Leucine-rich receptor-like protein kinase family protein		LOC_Os06g10230.1
GRMZM2G078954				2		DNA binding		NAC		AT1G25580	ANAC008,SOG1	NAC (No Apical Meristem) domain transcriptional regulator superfamily protein		LOC_Os06g36480.1
GRMZM2G472167				2		peptide transporter PTR2				AT5G46050	ATPTR3,PTR3	peptide transporter 3		LOC_Os03g04570.1
GRMZM2G115612				2		hypothetical protein LOC100279711				AT3G58490		Phosphatidic acid phosphatase (PAP2) family protein		LOC_Os03g59070.1
GRMZM2G095254				2		hypothetical protein LOC100278733				AT4G25835		P-loop containing nucleoside triphosphate hydrolases superfamily protein		LOC_Os09g27340.1
GRMZM2G150984				2		LOC100280432				AT4G14330		P-loop containing nucleoside triphosphate hydrolases superfamily protein		LOC_Os02g56540.1
GRMZM2G100121				2		Transcribed locus, weakly similar to XP_002442475.1 hypothetical protein SORBIDRAFT_08g020560 [Sorghum bicolor]				AT3G54650	FBL17	RNI-like superfamily protein		LOC_Os12g40860.1
GRMZM2G145045				2		protein kinase activity				AT1G21230	WAK5	wall associated kinase 5		LOC_Os04g29580.1
GRMZM2G145075				2		protein kinase activity				AT1G21230	WAK5	wall associated kinase 5		LOC_Os01g26174.1
GRMZM2G353734				2		structural constituent of ribosome				AT1G69600	ATHB29,ZFHD1	zinc finger homeodomain 1		LOC_Os09g24820.1
GRMZM2G065800				2.1		Transcribed locus
GRMZM2G143745				2.1		glycine-rich cell wall structural protein 2								LOC_Os10g31620.1
GRMZM2G161643				2.1		hypothetical protein LOC100194227				AT3G23600		alpha/beta-Hydrolases superfamily protein		LOC_Os05g33100.1
[truncated: 9,417 more rows]

## Sheet: Genotypic Comparisons
Gene	24h Cont					24h Sub					72h Sub					Maize Annotation		TF Family		Arabidopsis Best Hit				Rice Best Hit
[truncated: 15,180 more rows]

[truncated: 1 more sheets: RPKM]
