# Supplementary material for: Genetic and Molecular Characterization of Submergence Response Identifies Subtol6 as a Major Submergence Tolerance Locus in Maize
Source: PLOS journal article supplement (doi:10.1371/journal.pone.0120385), 2015-03-25
Supplement: S3 (10.1371/journal.pone.0120385.s003) [file journal.pone.0120385.s003]

M162W

B73

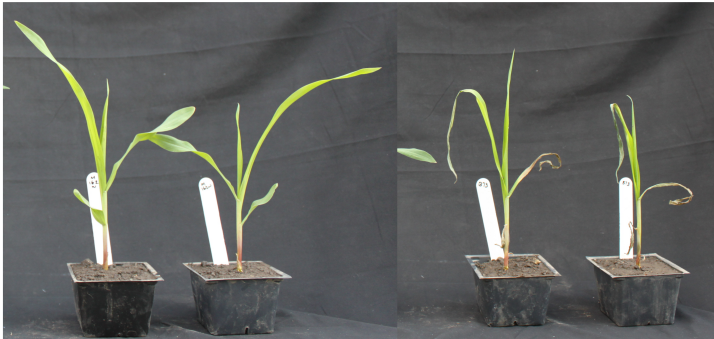

Mo18W

B97

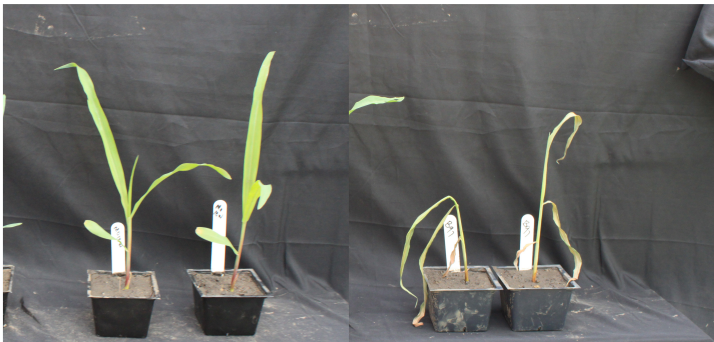

**S3 Figure.** Photographs showing tolerant (top and bottom left) and sensitive (top and bottom right pictures) inbreds. Photographs were taken on day 5 of recovery after 96 h of submergence.
